# Supplementary material
Source: PubMed Central journal article supplement (PMC3583361)
Supplement: NIHMS430780-supplement-supporting_info.pdf [file NIHMS430780-supplement-supporting_info.pdf]

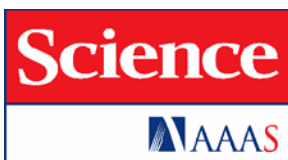

Supplementary Materials for  
**Enantioselective Heck Arylations of Acyclic Alkenyl Alcohols Using a Redox-Relay Strategy**

Erik W. Werner, Tian-Sheng Mei, Alexander J. Burckle, Matthew S. Sigman\*

\*To whom correspondence should be addressed. E-mail: sigman@chem.utah.edu

Published 14 December 2012, *Science* **338**, 1455 (2012)  
DOI: 10.1126/science.1229208

**This PDF file includes:**

Materials and Methods  
Fig. S1  
Tables S1 to S5  
References

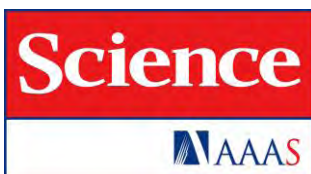

## Supplementary Materials for

# **Enantioselective Heck Arylations of Acyclic Alkenyl Alcohols Using a Redox-Relay Strategy**

Erik W. Werner, Tian-Sheng Mei, Alexander J. Burckle, Matthew S. Sigman

correspondence to: sigman@chem.utah.edu

### **Table of Contents**

|                                                             |       |
|-------------------------------------------------------------|-------|
| General Considerations                                      | 1–3   |
| Synthesis of alkene substrates                              | 3–15  |
| Synthesis of aryldiazonium salts                            | 15–16 |
| Synthesis of PyrOx ligands                                  | 16–24 |
| Identification of optimal PyrOx ligand                      | 24–26 |
| Optimization of the asymmetric Heck reaction                | 27–28 |
| General procedure, modifications, and characterization data | 28–53 |
| Determination of enantiomeric ratio                         | 54–56 |
| Chiral Separations                                          | 57–82 |

### General Considerations

Dry dimethylacetamide (DMA), and dimethylformamide (DMF) were purchased from Aldrich and stored over activated 3 angstrom molecular sieves (3 Å MS).

Tetrahydrofuran (THF) and dichloromethane (DCM) were dried before use by passing through a column of activated alumina. Alkene substrates were purchased from Aldrich, TCI or Acros, or synthesized according to the procedures referenced. Aldehyde precursors to alkene substrates were purchased from Aldrich. Propargyl magnesium bromide was purchased from Aldrich. Alkyne precursors to alkene substrates were purchased from Aldrich. Aniline precursors to aryldiazonium tetrafluoroborates and hexafluorophosphates were purchased from Aldrich. Palladium(II) chloride was purchased from Pressure Chemicals. Pd<sub>2</sub>dba<sub>3</sub> was synthesized according to the literature procedure.<sup>(35)</sup> Picolinic acid derivatives were purchased from Aldrich or Matrix scientific. Amino alcohols were synthesized according to the literature procedure. <sup>1</sup>H-NMR spectra were obtained at 300 MHz or 400 MHz, chemical shifts are reported in ppm, and referenced to the CHCl<sub>3</sub> singlet at 7.26 ppm. <sup>13</sup>C-NMR spectra were obtained at 75 MHz or 100 MHz and referenced to the center peak of the CDCl<sub>3</sub> triplet at 77.23 ppm. The abbreviations s, d, t, quint, dd, dt, and m stand for the resonance multiplicities singlet, doublet, triplet, quintet, doublet of doublets, doublet of triplets and multiplet, respectively. Thin-layer chromatography was performed with EMD silica gel 60 F254 plates eluting with solvents indicated, visualized by a 254 nm UV lamp and stained with phosphomolybdic acid. Flash chromatography was performed using EM reagent silica 60 (230-400 mesh). IR spectra were recorded using a Thermo Nicolet FT-IR. High resolution mass spectrometry (HRMS) data were obtained on a Waters LCP Premier XE instrument by ESI/TOF. Achiral GC (gas chromatography) was performed using a Hewlett Packard HP 6890 series GC system fitted with an Agilent HP-5 column. Chiral GC analysis was performed using a Hewlett Packard HP 6890 Series CG system fitted

with a HP-Chiral permethylated  $\beta$ -cyclodextrin column. SFC (supercritical fluid chromatography) analysis was performed at 40 °C, using a Thar instrument fitted with a chiral stationary phase as indicated. Optical rotations were measured (Na D line) on a Perkin Elmer Model 343 Polarimeter fitted with a micro cell with a 1 dm path length; concentrations are reported in g/100 mL. (*S*)-(+)-**3f** is a previously reported compound with a known optical rotation,(33, 34) and the absolute stereochemistry of products **3a-3m** were assigned based on analogy to this compound where possible. *It should be noted that while no incident occurred during this study, aryldiazonium salts can be explosive.*

### Synthesis of alkene substrates

#### General procedure for the synthesis of propargylic alcohol precursors to allylic alcohol substrates

##### Dodec-2-yn-4-ol (**S1**)

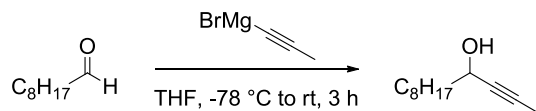

To a dry 100 mL round-bottom flask containing a stir bar was added nonanal (1.42 g, 10 mmol). The flask was placed under an  $N_2$  atmosphere, and cooled to  $-78\text{ }^\circ\text{C}$ . A solution of 1-propynyl magnesium bromide (22 mL, 0.5 M in THF, 1.1 equiv) was added slowly while stirring. The mixture was stirred at that temperature for 1 h, prior to allowing it to warm to room temperature, and stirring for an additional 2 h. Saturated ammonium chloride (20 mL) was added slowly, prior to transferring the mixture to a 250 mL separatory funnel with diethyl ether. The aqueous layer was extracted with ether (3 x 50 mL). The combined organic layers were washed with water (1 x 50 mL), then brine,

and then dried over sodium sulfate. The organic mixture was concentrated under reduced pressure, and the concentrate was purified by silica gel flash chromatography using 5% acetone in hexanes to give dodec-2-yn-4-ol as a colorless oil (1.24 g, 68%). The purity was confirmed by  $^1\text{H}$  NMR.(36)

#### 1-Phenylbut-2-yn-1-ol (S2)

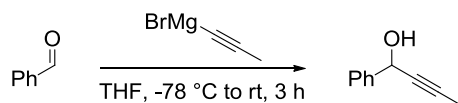

The procedure used for the preparation of dodec-2-yn-4-ol was used except benzaldehyde (1.06 g, 10 mmol) was used. The product was purified by silica gel chromatography using 5% acetone in hexanes to give 1-phenylbut-2-yn-1-ol (1.41 g, 97%). The purity was confirmed by  $^1\text{H}$  NMR.(37)

#### 1-Phenylpent-3-yn-2-ol (S3)

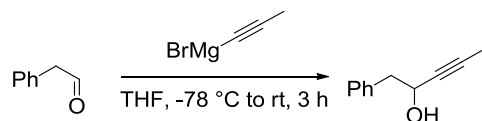

The procedure used for the preparation of dodec-2-yn-4-ol was used except 2-phenylacetaldehyde (1.20 g, 10 mmol) was used. The product was purified by silica gel chromatography using 5% acetone in hexanes to give 1-phenylpent-3-yn-2-ol (1.04 g, 65%). The purity was confirmed by  $^1\text{H}$  NMR.(38)

#### 6-Methylhept-2-yn-4-ol (S4)

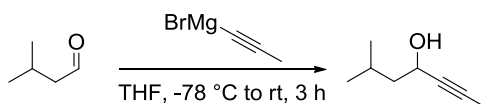

The procedure used for the preparation of dodec-2-yn-4-ol was used except 3-methylbutanal (860 mg, 10 mmol) was used. The product was purified by silica gel chromatography using 3% acetone in hexanes to give 6-methylhept-2-yn-4-ol (810 mg, 64%). The purity was confirmed by  $^1\text{H}$  NMR.(39)

#### 2-Methylhex-4-yn-3-ol (S5)

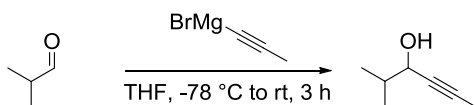

The procedure used for the preparation of dodec-2-yn-4-ol was used except isobutyraldehyde (360 mg, 5 mmol) was used. The product was purified by silica gel chromatography using 3% acetone in hexanes to give 6-methylhex-4-yn-2-ol (380 mg, 68%). The purity was confirmed by  $^1\text{H}$  NMR.(40)

#### Synthesis of dodec-7-yn-6-ol (S6)

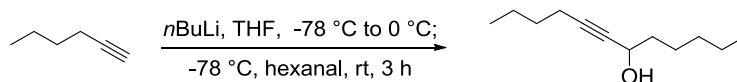

To a dry 100 mL round-bottom flask containing a stir bar and under an  $\text{N}_2$  atmosphere was added THF (15 mL). The solvent was cooled to  $-78\text{ }^\circ\text{C}$ , prior to adding 1-hexyne via syringe (870  $\mu\text{L}$ , 620 mg, 7.5 mmol). To this mixture was added *n*BuLi (3.2 mL of 2.5 M solution in THF, 8.0 mmol, 1.1 equiv) via syringe. The mixture was allowed to warm to  $0\text{ }^\circ\text{C}$ , and stirred at that temperature for 1 h. The mixture was then cooled to  $-78\text{ }^\circ\text{C}$ , and to this mixture hexanal (930  $\mu\text{L}$ , 650 mg, 7.5 mmol) was added dropwise via syringe. The mixture was allowed to warm to room temperature, and stirred for 3 h. Saturated ammonium chloride (15 mL) was added slowly, prior to transferring

the mixture to a 250 mL separatory funnel with diethyl ether. The aqueous layer was extracted with ether (3 x 40 mL). The combined organic layers were washed with water (1 x 40 mL), then brine (1 x 40 mL), and then dried over sodium sulfate. The organic mixture was concentrated under reduced pressure, and the concentrate was purified by silica gel flash chromatography using 2% acetone in hexanes to give dodec-7-yn-6-ol as a colorless oil (980 mg, 72% yield). Purity was confirmed by  $^1\text{H}$  NMR.(41)

#### Synthesis of 7-hydroxy-9-methyldec-5-ynoic acid (**S7**)

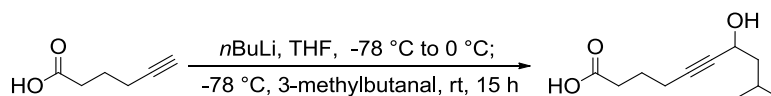

To a dry 100 mL round-bottom flask containing a stir bar was added 560 mg hex-5-ynoic acid (560 mg, 5 mmol). The flask was placed under an  $\text{N}_2$  atmosphere, prior to adding THF (50 mL) and cooling the mixture to  $-78\text{ }^\circ\text{C}$ . To the cooled solution was added  $n\text{BuLi}$  (5 mL of a 2.5 M solution in hexanes, 11 mmol, 2.2 equiv) dropwise via syringe. The mixture was allowed to warm to room temperature and stirred for 1 h. The mixture was cooled to  $-78\text{ }^\circ\text{C}$ , and then to this mixture 3-methylbutanal (600  $\mu\text{L}$ , 470 mg, 5.5 mmol, 1.1 equiv) was added dropwise via syringe. The mixture was allowed to warm to room temperature, and stirred for 15 h. Saturated ammonium chloride (15 mL) was added slowly, prior to transferring the mixture to a 250 mL separatory funnel with diethyl ether. The aqueous layer was extracted with ether (3 x 40 mL). The combined organic layers were washed with water (1 x 40 mL), then brine (1 x 40 mL), and then dried over sodium sulfate. The organic mixture was concentrated under reduced pressure, and the concentrate was purified by silica gel flash chromatography using 20% acetone in

hexanes to give 7-hydroxy-9-methyldec-5-ynoic (800 mg) with minor impurities. This mixture was carried forward without further purification.

#### Synthesis of hept-3-yn-2-ol (**S8**)

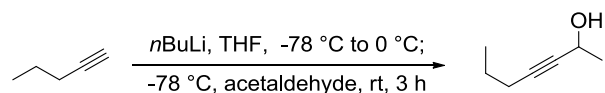

The procedure used for the preparation of dodec-7-yn-6-ol was followed except 1-pentyne (990  $\mu$ L, 680 mg, 10 mmol) and acetaldehyde (620  $\mu$ L, 480 mg, 11 mmol) were used. The product was purified by silica gel chromatography using 5% acetone in hexanes to give hept-3-yn-2-ol (670 mg, 60%). The purity was confirmed by  $^1\text{H}$  NMR.<sup>(42)</sup>

#### Synthesis of 1-phenyloct-4-yn-2-ol (**S9**)

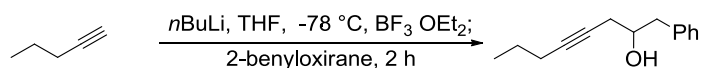

A dry 50 mL round bottom flask containing a stir bar was placed under an  $\text{N}_2$  atmosphere prior to adding THF (10 mL). The mixture was cooled to  $-78\text{ }^\circ\text{C}$ , and to it was added 1-pentyne (740  $\mu$ L, 510 mg, 7.5 mmol). To this mixture was added *n*BuLi (3.0 mL of a 2.5 M solution in hexanes, 7.5 mmol) dropwise via syringe. To this mixture was added borontrifluoride etherate (930  $\mu$ L, 7.5 mmol) dropwise via syringe, and the resulting mixture was stirred for 30 min. To this mixture was added 2-benzyloxirane (810  $\mu$ L, 1.00 g, 7.5 mmol), and the resulting mixture was stirred for 2 h. Saturated ammonium chloride (15 mL) was added slowly, prior to transferring the mixture to a 250 mL separatory funnel with diethyl ether. The aqueous layer was extracted with ether (3 x



40 mL). The combined organic layers were washed with water (1 x 40 mL), then brine (1 x 40 mL), and then dried over sodium sulfate. The organic mixture was concentrated under reduced pressure, and the concentrate was purified by silica gel flash chromatography using hexanes to 5% acetone in hexanes to give 1-phenyloct-4-yn-2-ol (1.26 g) with minor impurities. This mixture was carried forward without further purification.

#### Synthesis of methyl 7-hydroxy-9-methyldec-5-ynoate (**S10**)

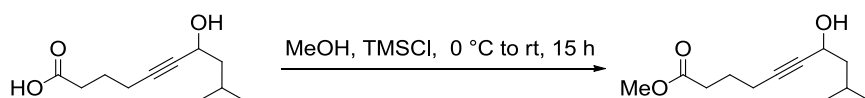

To a dry 25 mL round-bottom flask containing a stir bar was added 7-hydroxy-9-methyldec-5-ynoic (570 mg, 2.9 mmol). The flask was placed under an N<sub>2</sub> atmosphere, prior to add methanol (2 mL). The mixture was cooled to 0 °C, and to the cooled mixture was added chlorotrimethylsilane (560 uL, 480 mg, 4.4 mmol, 1.5 equiv). The mixture was allowed to warm to room temperature, and stirred for 15 h. The solvent was removed under reduced pressure, resulting in a yellow oil. The residue was transferred to a separatory funnel using 50 mL diethyl ether. The organic mixture was washed with water (3 x 10 mL), then brine (1 x 10 mL), and was then dried over sodium sulfate. The organic layer was concentrated under reduced pressure to give a light yellow oil (620 mg), which was carried forward without purification.

#### General procedure for the synthesis of (*E*)-allylic alcohol substrates

##### Synthesis of (*E*)-dodec-2-en-4-ol (**S11**)

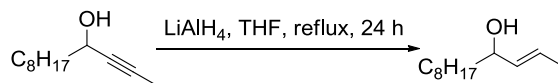

To a dry 100 mL round-bottom flask equipped with a stir bar was added lithium aluminum hydride (230 mg, 6 mmol, 3 equiv). The flask was equipped with a condenser, and the apparatus was placed under an N<sub>2</sub> atmosphere. To this flask was added THF (30 mL), and the mixture was stirred. To this mixture was slowly added dodec-2-yn-4-ol (360 mg, 2 mmol) in THF (10 mL). The mixture was heated to gentle reflux using a heating mantle, and stirred for 24 h. The mixture was cooled to 0 °C, the condenser was removed, and the mixture was diluted with diethyl ether (10 mL). To this mixture was added water (230 μL), dropwise via syringe. To the resulting mixture was added 20 wt% KOH (230 μL), then water (690 μL). This mixture was stirred for 1 h, then placed in a sonicating water bath for an additional 1 h. The mixture was then filtered through Celite, and the resulting homogeneous organic solution was concentrated under reduced pressure. The mixture was purified by silica gel flash chromatography using 2% acetone in hexanes to give (*E*)-dodec-2-en-4-ol (260 mg, 69%). The purity was confirmed by <sup>1</sup>H NMR.(43)

#### Synthesis of (*E*)-6-methylhept-2-en-4-ol (**S12**)

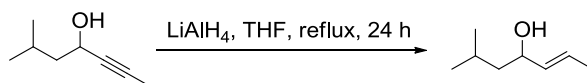

The procedure used for the preparation of (*E*)-dodec-2-en-4-ol was followed except 6-methylhept-2-yn-4-ol (250 mg, 2 mmol) was used. The product was purified by silica gel flash chromatography using 2% acetone in hexanes to give (*E*)-6-methylhept-2-en-4-ol (95 mg, 37%). The purity was confirmed by <sup>1</sup>H NMR.(44)

### Synthesis of (*E*)-2-methylhex-4-en-3-ol (**S13**)

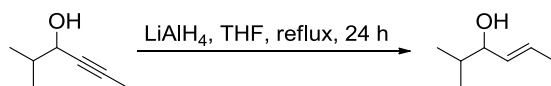

The procedure used for the preparation of (*E*)-dodec-2-en-4-ol was followed except 2-methylhex-4-yn-3-ol (330 mg, 2.9 mmol) was used. The product was purified by silica gel flash chromatography using 2% acetone in hexanes to give (*E*)-2-methylhex-4-en-3-ol (180 mg, 54%). The purity was confirmed by <sup>1</sup>H NMR.(45)

### Synthesis of (*E*)-dodec-7-en-6-ol (**S14**)

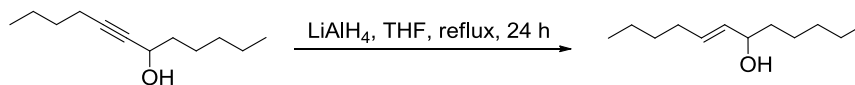

The procedure used for the preparation of (*E*)-dodec-2-en-4-ol was followed except dodec-7-yn-6-ol (540 mg, 3.0 mmol) was used. The product was purified by silica gel flash chromatography using 2% acetone in hexanes to give (*E*)-dodec-7-en-6-ol (420 mg, 76%). The purity was confirmed by <sup>1</sup>H NMR.(46)

### Synthesis of (*E*)-9-methyldec-5-ene-1,7-diol (**S15**)

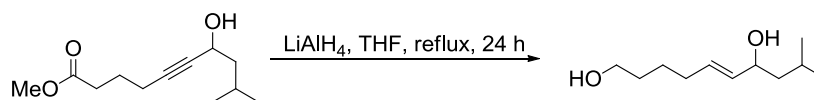

The procedure used for the preparation of (*E*)-dodec-2-en-4-ol was followed except methyl-7-hydroxy-9-methyldec-5-ynoate (370 mg, 1.7 mmol), and 330 mg LiAlH<sub>4</sub> (8.8 mmol 5.0 equiv) were used. The product was purified by silica gel flash chromatography using 10% acetone in hexanes to give (*E*)-9-methyldec-5-ene-1,7-diol

(280 mg, 86%) as a colorless oil.  $R_f = 0.31$  w/ 20% acetone:hexanes.  $^1\text{H-NMR}$  (300 MHz,  $\text{CDCl}_3$ )  $\delta = 5.69\text{-}5.60$  (m, 1 H),  $5.51\text{-}5.43$  (m, 1 H),  $4.16\text{-}4.08$  (m, 1 H),  $3.65$  (q,  $J = 6.2$  Hz, 2 H),  $2.08$  (dt,  $J = 7.3, 6.7$  Hz, 2 H),  $1.76\text{-}1.21$  (m, 8 H),  $0.92$  (d,  $J = 6.6$  Hz, 3 H),  $0.91$  (d,  $J = 6.6$  Hz, 3 H).  $^{13}\text{C-NMR}$  (75 MHz,  $\text{CDCl}_3$ )  $\delta = 134.0, 131.6, 71.5, 63.0, 46.7, 32.4, 32.1, 25.5, 24.8, 23.1, 22.7$ . IR (neat):  $3313, 2953, 2929, 2968, 1467, 1366, 1056, 968\text{ cm}^{-1}$ . HRMS  $\text{C}_{11}\text{H}_{22}\text{O}_2$  ( $\text{M}+\text{Na}$ ) $^+$  calcd. 209.1517, obsvd. 209.1520.

#### Synthesis of (*E*)-hept-3-en-2-ol (**S16**)

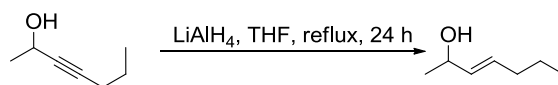

The procedure used for the preparation of (*E*)-dodec-2-en-4-ol was followed except hept-3-yn-2-ol (1.84 g, 16.4 mmol) was used. The product was purified by silica gel flash chromatography using 2% acetone in hexanes to give (*E*)-hept-3-en-ol (330 mg, 29%). The purity was confirmed by  $^1\text{H NMR}$ .(47)

#### General procedure for the synthesis of (*E*)-homoallylic alcohol substrates

#### Synthesis of (*E*)-hept-4-en-2-ol (**S17**)

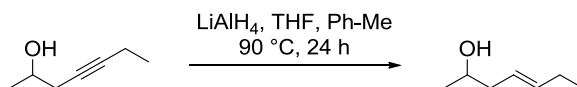

To a dry 100 mL round-bottom flask equipped with a stir bar was added lithium aluminum hydride (1.20 g, 32 mmol, 3.2 equiv). The flask was equipped with a condenser, and the apparatus was placed under an  $\text{N}_2$  atmosphere. To this flask was added toluene (13 mL), and THF (6 mL) and the mixture was stirred. To this mixture was slowly added hept-4-yn-2-ol (1.12 g, 10 mmol) in THF (7 mL). The mixture was

heated to 90 °C, using a temperature-regulated oil bath, and stirred for 24 h. The mixture was cooled to 0 °C, the condenser was removed, and the mixture was diluted with diethyl ether (20 mL). To this mixture was added water (1.2 mL), dropwise via syringe. To the resulting mixture was added 20 wt% KOH (1.2 mL), then water (3.6 mL). This mixture was stirred for 1 h, then placed in a sonicating water bath for an additional 1 h. The mixture was then filtered through Celite, and the resulting homogeneous organic mixture was concentrated under reduced pressure to give a mixture containing toluene. The mixture was purified by silica gel flash chromatography using 0% to 10% to 20% diethyl ether in pentane to give (*E*)-hept-4-en-2-ol (760 mg, 67%). The purity was confirmed by <sup>1</sup>H NMR.(48)

#### Synthesis of (*E*)-1-phenyloct-4-en-2-ol (**S18**)

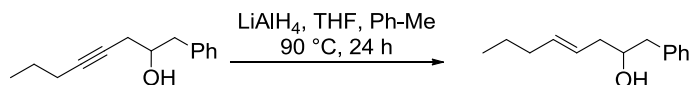

The procedure used for the preparation of (*E*)-hept-4-en-2-ol was followed except 1-phenyloct-4-yn-2-ol (400 mg, 2 mmol) was used. The product was purified by silica gel flash chromatography using 0 to 3% acetone in hexanes to give (*E*)-1-phenyloct-4-en-2-ol (240 mg, 59%) as a colorless oil.  $R_f = 0.34$  w/ 10% acetone in hexanes. <sup>1</sup>H-NMR (300 MHz, CDCl<sub>3</sub>)  $\delta = 7.34$ - $7.21$  (m, 5 H),  $5.61$ - $5.52$  (m, 1 H),  $5.49$ - $5.39$  (m, 1 H),  $3.88$ - $3.78$  (m, 1 H),  $2.84$ - $2.68$  (m, 2 H),  $2.32$ - $2.10$  (m, 2 H),  $2.01$  (dt,  $J = 7.3, 6.6$  Hz, 2 H),  $1.70$  (d,  $J = 3.4$  Hz, 1 H),  $1.39$  (sextet,  $J = 7.4$  Hz, 2 H),  $0.90$  (t,  $J = 7.3$  Hz, 3 H). <sup>13</sup>C-NMR (75 MHz, CDCl<sub>3</sub>)  $\delta = 138.8, 134.7, 129.6, 128.6, 126.6, 126.0, 72.2, 43.4, 40.2, 35.0, 22.7, 13.9$ . IR (neat):  $3933, 3027, 2956, 2925, 1496, 1436, 1078, 970, 741, 699$  cm<sup>-1</sup>. HRMS C<sub>14</sub>H<sub>20</sub>O (M+Na)<sup>+</sup> calcd. 227.1412, obsvd. 227.1411.

General procedure for the synthesis of (Z)-allylic alcohol and (Z)-homoallylic alcohol substrates

Synthesis of (Z)-dodec-2-en-4-ol (**S19**)

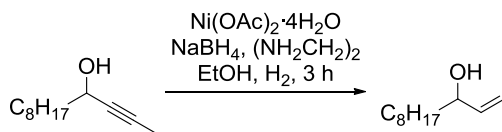

The 95:5 by weight mixture of ethanol and water that was used as solvent was prepared by diluting absolute ethanol (95 g) with water (5 g). To a 50 mL Schlenk flask containing a stir bar was added nickel(II) acetate tetrahydrate (124 mg, 0.5 mmol, 25 mol %), and sodium borohydride (20 mg, 0.5 mmol, 25 mol %). To this mixture was added 95 wt% ethanol (15 mL), and the mixture was stirred for 10 min. To this mixture was added ethylenediamine (80 mL, 1 mmol, 50 mol%) via syringe. A three-way joint was fitted with a balloon of H<sub>2</sub> and attached to the flask. The apparatus was evacuated and refilled with hydrogen three times. The mixture was stirred under H<sub>2</sub> atmosphere for 10 min. To the mixture was added dodec-2-yn-4-ol (360 mg, 2.0 mmol) in 95 wt% ethanol (5 mL). The mixture was stirred at room temperature for 3 h, before it was filtered through Celite with diethyl ether. The resulting homogeneous mixture was transferred to a separatory funnel using ether (10 mL) and water (10 mL). The aqueous layer was extracted with ether (3 x 15 mL), and the combined organic layers were washed with water (3 x 15 mL), then brine (1 x 15 mL). The combined organic layers were dried over sodium sulfate, before they were concentrated under reduced pressure. The mixture was purified by silica gel flash chromatography using 2% acetone in hexanes to give (Z)-dodec-2-en-4-ol (260 mg, 69%). The purity was confirmed by <sup>1</sup>H NMR.(43)

### Synthesis of (Z)-1-phenylbut-2-en-1-ol (**S20**)

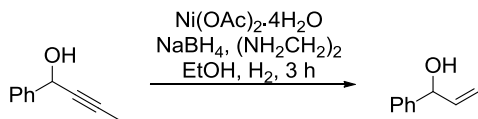

The procedure used for the preparation of (Z)-dodec-2-en-4-ol was followed except 1-phenylbut-2-yn-1-ol (290 mg, 2.0 mmol) was used. The product was purified by silica gel flash chromatography using 3% acetone in hexanes to give (Z)-1-phenylbut-2-en-1-ol (170 mg, 58%). The purity was confirmed by  $^1\text{H}$  NMR.(49)

### Synthesis of (Z)-2-methylhex-4-en-3-ol (**S21**)

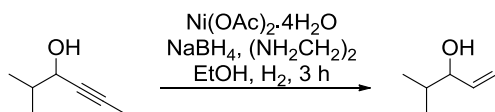

The procedure used for the preparation of (Z)-dodec-2-en-4-ol was followed except 2-methylhex-4-yn-3-ol (450 mg, 4.0 mmol) was used. The product was purified by silica gel flash chromatography using 3% acetone in hexanes to give (Z)-2-methylhex-4-en-2-ol (180 mg, 39%). The purity was confirmed by  $^1\text{H}$  NMR.(50)

### Synthesis of (Z)-methyl 7-hydroxy-9-methyldec-5-enoate (**S22**)

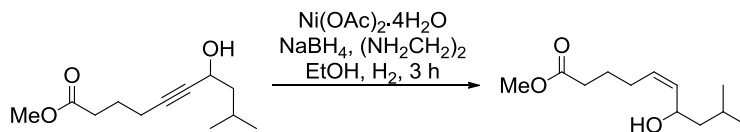

The procedure used for the preparation of (Z)-dodec-2-en-4-ol was followed except methyl 7-hydroxy-9-methyldec-5-ynoate (230 mg, 1.1 mmol) was used, and the mixture was stirred for 15 h under  $\text{H}_2$ . The product was purified by silica gel flash

chromatography using 10% acetone in hexanes to give (*Z*)-methyl 7-hydroxy-9-methyldec-5-enoate (170 mg, 72%) containing minor amounts of the (*E*)-isomer.  $R_f = 0.34$  w/ 10% acetone in hexanes. Major isomer:  $^1\text{H-NMR}$  (300 MHz,  $\text{CDCl}_3$ )  $\delta = 5.46$ -5.36 (m, 2 H), 4.51-4.34 (m, 1 H), 3.67 (s, 3 H), 2.33 (t,  $J = 7.3$  Hz, 2 H) 2.34-2.06 (m, 2 H), 1.78-1.61 (m, 4 H), 1.55-1.46 (m, 2 H), 1.33-1.20 (m, 2 H), 0.94-0.90 (m, 6 H).  $^{13}\text{C-NMR}$  (75 MHz,  $\text{CDCl}_3$ )  $\delta = 174.3$ , 134.5, 130.6, 65.8, 51.8, 46.7, 33.5, 27.0, 25.0, 23.2, 22.8. IR (neat): 3417, 2953, 2869, 1734, 1437, 1214, 1163, 1053, 1013.  $\text{cm}^{-1}$ . HRMS  $\text{C}_{12}\text{H}_{22}\text{O}_3$  ( $\text{M}+\text{Na}$ ) $^+$  calcd. 237.1467, obsvd. 237.1472.

#### Synthesis of (*Z*)-hept-4-en-2-ol (**23**)

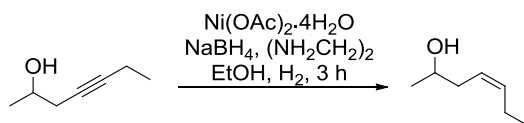

The procedure used for the preparation of (*Z*)-dodec-2-en-4-ol was followed except hept-4-yn-2-ol (330 mg, 3.0 mmol) was used. The product was purified by silica gel flash chromatography using 5% diethyl ether in pentane to give (*Z*)-hept-4-en-2-ol (200 mg, 58%). The purity was confirmed by  $^1\text{H NMR}$ . (50)

#### Synthesis of aryldiazonium salts

##### Synthesis of benzenediazonium tetrafluoroborate (**S24**)

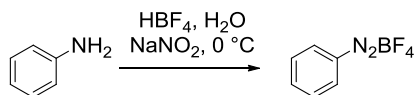

Benzene diazonium tetrafluoroborate was synthesized by a previously reported procedure.(13)



## Synthesis of aryldiazonium hexafluorophosphates (S25)

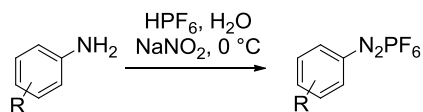

Aryl diazonium hexafluorophosphate reagents were synthesized by a previously reported procedure.<sup>(51)</sup>

## General procedure for the synthesis of PyrOx ligands-Anderson coupling

### Synthesis of (*S*)-*N*-(1-hydroxy-3-methylbutan-2-yl)-4-methylpicolinamide (S26)

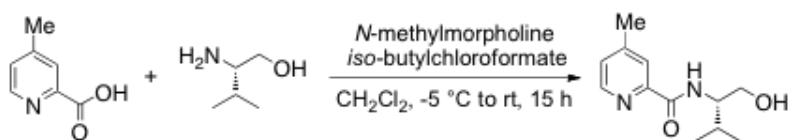

To a dry 100 mL round-bottom flask containing a stir bar was added 4-methylpicolinic acid (140 mg, 1.0 mmol). The flask was placed under an N<sub>2</sub> atmosphere. Dichloromethane (20 mL) was added via syringe, followed by *N*-methylmorpholine (170 mL, 1.5 mmol, 1.15 equiv). The reaction mixture was cooled to 0 °C, then *iso*-butyl chloroformate was added (160 uL, 1.2 mmol, 1.2 equiv). The mixture was stirred for 20 min, then (*S*)-leucinol (120 mg, 1.2 mmol, 1.2 equiv) was added in dichloromethane (15 mL). The mixture was allowed to warm to rt and stirred for 15 h). The mixture was transferred to a separatory funnel with dichloromethane (10 mL) and water (10 mL). The aqueous layer was extracted with dichloromethane (1 x 15 mL), and the combined organic layers were washed with water (1 x 20 mL), and brine (1 x 20 mL), then dried over sodium sulfate. The dried organic mixture was concentrated under reduced pressure

and purified by silica gel flash chromatography with 2:1 hexanes:ethyl acetate to give (*S*)-*N*-(1-hydroxy-3-methylbutan-2-yl)-4-methylpicolinamide (70 mg, 30%).

Synthesis of (*S*)-*N*-(1-hydroxy-3,3-dimethylbutan-2-yl)-4-methyl picolinamide (**S27**)

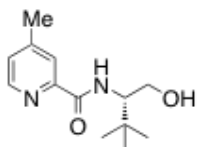

(*S*)-*N*-(1-Hydroxy-3,3-dimethylbutan-2-yl)-4-methylpicolinamide was prepared by following a literature procedure.(29)

Synthesis of (*S*)-4-chloro-*N*-(1-hydroxypropan-2-yl) picolinamide (**S28**)

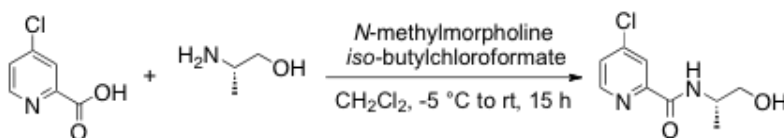

The procedure used for the preparation of (*S*)-*N*-(1-hydroxy-3-methylbutan-2-yl)-4-methylpicolinamide was used except 4-chloropicolinic acid (320 mg, 2.0 mmol) and (*S*)-alinol (140 mg, 2.4 mmol, 1.2 equiv) were used. The mixture was purified by silica gel flash chromatography with 2:1 hexanes:ethyl acetate to give (*S*)-4-chloro-*N*-(1-hydroxypropan-2-yl)picolinamide (246 mg, 58%).

Synthesis of (*S*)-4-chloro-*N*-(1-hydroxy-3-methylbutan-2-yl)picolinamide (**S29**)

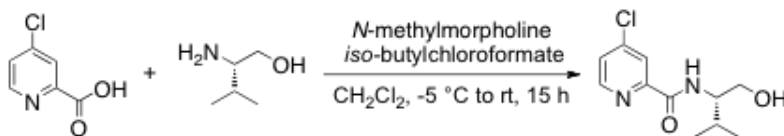

The procedure used for the preparation of (*S*)-*N*-(1-hydroxy-3-methylbutan-2-yl)-4-methylpicolinamide was used except 4-chloropicolinic acid (630 mg, 4.0 mmol) and (*S*)-leucinol (500 mg, 4.8 mmol, 1.2 equiv) were used. The mixture was purified by silica gel flash chromatography with 2:1 hexanes:ethyl acetate to give (*S*)-4-chloro-*N*-(1-hydroxy-3-methylbutan-2-yl)picolinamide (830 mg, 87%).

Synthesis of (*S*)-4-chloro-*N*-(1-hydroxy-3,3-dimethylbutan-2-yl)picolinamide (**S30**)

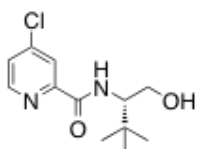

(*S*)-4-Chloro-*N*-(1-hydroxy-3,3-dimethylbutan-2-yl)picolinamide was prepared by following a literature procedure.(29)

Synthesis of (*S*)-*N*-(1-hydroxypropan-2-yl)-4-(trifluoromethyl)picolinamide (**S31**)

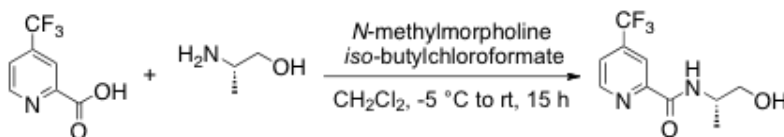

The procedure used for the preparation of (*S*)-*N*-(1-hydroxy-3-methylbutan-2-yl)-4-methylpicolinamide was used except 4-trifluoromethylpicolinic acid (380 mg, 2.0 mmol) and (*S*)-alinol (180 mg, 2.4 mmol, 1.2 equiv) were used. The mixture was purified by silica gel flash chromatography with 2:1 hexanes:ethyl acetate to give (*S*)-*N*-(1-hydroxypropan-2-yl)-4-(trifluoromethyl)picolinamide (370 mg, 75%).

Synthesis of (*S*)-*N*-(1-hydroxy-3-methylbutan-2-yl)-4-(trifluoromethyl) picolinamide (**S32**)

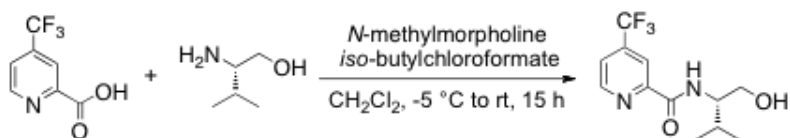

The procedure used for the preparation of (*S*)-*N*-(1-hydroxy-3-methylbutan-2-yl)-4-methylpicolinamide was used except 4-trifluoromethylpicolinic acid (380 mg, 2.0 mmol) and (*S*)-leucinol (250 mg, 2.4 mmol, 1.2 equiv) were used. The mixture was purified by silica gel flash chromatography with 2:1 hexanes:ethyl acetate to give (*S*)-*N*-(1-hydroxy-3-methylbutan-2-yl)-4-(trifluoromethyl)picolinamide (350 mg, 72%).

Synthesis of (*S*)-*N*-(1-hydroxy-3,3-dimethylbutan-2-yl)-4-(trifluoromethyl) picolinamide (**S33**)

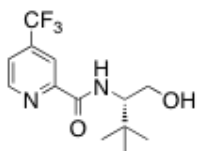

(*S*)-*N*-(1-Hydroxy-3,3-dimethylbutan-2-yl)-4-(trifluoromethyl)picolinamide was prepared by following a literature procedure.(29)

Synthesis of (*S*)-*N*-(1-hydroxy-3,3-dimethylbutan-2-yl)-5-(trifluoromethyl) picolinamide (**S34**)

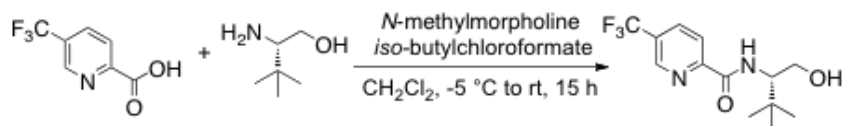

The procedure used for the preparation of (*S*)-*N*-(1-hydroxy-3-methylbutan-2-yl)-4-methylpicolinamide was used except 5-trifluoromethylpicolinic acid (280 mg, 1.5 mmol) and (*S*)-*tert*-leucinol (190 mg, 1.6 mmol, 1.1 equiv) were used. The mixture was

purified by silica gel flash chromatography with 2:1 hexanes:ethyl acetate to give (*S*)-*N*-(1-hydroxy-3,3-dimethylbutan-2-yl)-5-(trifluoromethyl)picolinamide (410 mg, 94%).  $[\alpha]_D^{20} = -10^\circ$  ( $c = 0.113$ ,  $\text{CHCl}_3$ ).  $R_f = 0.14$  w/ 2:1 hexanes:EtOAc.  $^1\text{H-NMR}$  (300 MHz,  $\text{CDCl}_3$ )  $\delta = 8.83$  (br s, 1 H), 8.31 (d,  $J = 8.1$  Hz, 1 H), 8.25 (br d,  $J = 9.1$  Hz, 1 H), 8.09 (dd,  $J = 8.1, 1.7$  Hz, 1 H), 4.06-3.97 (m, 2 H), 3.73-3.67 (m, 1 H), 2.57 (br s, 1 H), 1.04 (s, 3 H).  $^{13}\text{C-NMR}$  (75 MHz,  $\text{CDCl}_3$ )  $\delta = 164.1, 152.7, 145.4$  (q,  $J = 4.0$  Hz), 135.0 (q,  $J = 3.6$  Hz), 129.0 (q,  $J = 33.1$  Hz), 123.3 (q,  $J = 272.7$  Hz), 122.4, 63.2, 60.5, 34.1, 27.1. IR (neat): 3379, 2964, 1673, 1528, 1327, 1166, 1135, 1076, 1054, 1018  $\text{cm}^{-1}$ . HRMS  $\text{C}_{13}\text{H}_{17}\text{F}_3\text{N}_2\text{O}_2$  ( $\text{M}+\text{Na}$ ) $^+$  calcd. 313.1140, obsvd. 313.1147.

#### General procedure for the synthesis of PyrOx ligands-oxazoline formation

##### Synthesis of (*S*)-4-isopropyl-2-(4-methylpyridin-2-yl)-4,5-dihydrooxazole (**S35**)

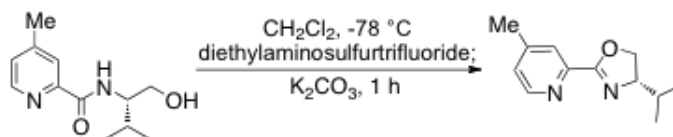

To a dry 25 mL round-bottom flask containing a stir bar was added (*S*)-*N*-(1-hydroxy-3,3-dimethylbutan-2-yl)-4-methylpicolinamide (60 mg, 0.3 mmol). The flask was placed under an  $\text{N}_2$  atmosphere, then dichloromethane (4 mL) was added via syringe. The reaction mixture was cooled to  $-78^\circ\text{C}$  and diethylaminosulfur trifluoride (50 mL, 0.4 mmol, 1.4 equiv) was added. The reaction mixture was stirred for 1 h, then potassium carbonate (80 mg, 0.6 mmol, 2 equiv) was added. The mixture was warmed to rt, transferred to a separatory funnel with dichloromethane (10 mL) and water (10 mL). The organic layer was washed with saturated sodium bicarbonate (1 x 10 mL), and brine (1 x 10 mL), then dried over sodium sulfate. The dried organic layer was concentrated under

reduced pressure, and the mixture purified by silica gel flash chromatography using 2:1 hexanes:ethyl acetate + 0.1% triethylamine to give the product (10 mg, 18%). This material decomposed rapidly, and was used immediately as ligand.

#### Synthesis of (*S*)-4-(*tert*-butyl)-2-(4-methylpyridin-2-yl)-4,5-dihydrooxazole (**S36**)

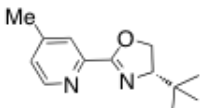

(*S*)-*N*-(1-Hydroxy-3,3-dimethylbutan-2-yl)-4-methylpicolinamide was prepared by following a literature procedure.(29) The material decomposed rapidly, and was used immediately as ligand.

#### Synthesis of (*S*)-2-(4-chloropyridin-2-yl)-4-methyl -4,5-dihydrooxazole (**S37**)

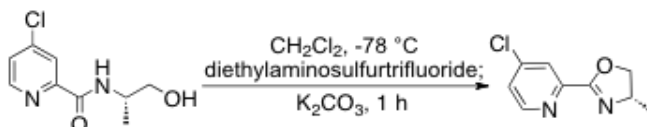

The procedure used for the preparation for the preparation of (*S*)-4-isopropyl-2-(4-methylpyridin-2-yl)-4,5-dihydrooxazole was used except (*S*)-4-chloro-*N*-(1-hydroxy-3,3-dimethylbutan-2-yl)picolinamide (110 mg, 0.5 mmol) was used. The product was purified in the same fashion, to give a material (10 mg, 11%) that decomposed rapidly, and was used immediately as ligand.

#### Synthesis of (*S*)-2-(4-chloropyridin-2-yl)-4-isopropyl-4,5-dihydrooxazole (**S38**)

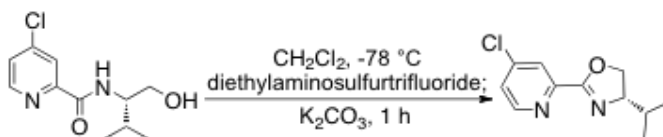

The procedure used for the preparation for the preparation of (*S*)-4-isopropyl-2-(4-methylpyridin-2-yl)-4,5-dihydrooxazole was used except (*S*)-4-chloro-*N*-(1-hydroxy-3-methylbutan-2-yl)picolinamide (110 mg, 0.4 mmol) was used. The product was purified in the same fashion, to give a material (70 mg, 62%) that was used immediately as ligand.

Synthesis of (*S*)-4-(*tert*-butyl)-2-(4-chloropyridin-2-yl)-4,5-dihydrooxazole (**S39**)

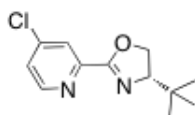

*S*-4-(*tert*-butyl)-2-(4-chloropyridin-2-yl)-4,5-dihydrooxazole was prepared by following a literature procedure.(29)

Synthesis of (*S*)-4-methyl-2-(4-(trifluoromethyl)pyridin-2-yl)-4,5-dihydrooxazole (**S40**)

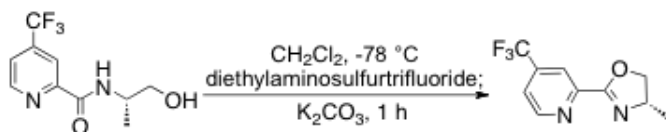

The procedure used for the preparation for the preparation of (*S*)-4-isopropyl-2-(4-methylpyridin-2-yl)-4,5-dihydrooxazole was used except (*S*)-*N*-(1-hydroxypropan-2-yl)-4-(trifluoromethyl)picolinamide (110 mg, 0.4 mmol) was used. The product was purified in the same fashion, to give a material (32 mg, 28%) that decomposed rapidly and was used immediately as ligand.

Synthesis of (*S*)-4-isopropyl-2-(4-(trifluoromethyl)pyridin-2-yl)-4,5-dihydrooxazole (**S41**)

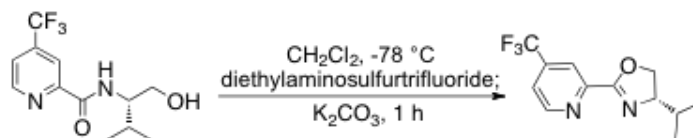

The procedure used for the preparation for the preparation of (*S*)-4-isopropyl-2-(4-methylpyridin-2-yl)-4,5-dihydrooxazole was used except (*S*)-*N*-(1-hydroxy-3-methylbutan-2-yl)-4-(trifluoromethyl)picolinamide (140 mg, 0.5 mmol) was used. The product was purified in the same fashion, to give a material (70 mg, 51%) that was used immediately as ligand.

Synthesis of (*S*)-4-(*tert*-butyl)-2-(4-(trifluoromethyl)pyridin-2-yl)-4,5-dihydrooxazole (**1a**)

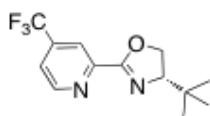

(*S*)-4-(*tert*-Butyl)-2-(4-(trifluoromethyl)pyridin-2-yl)-4,5-dihydrooxazole was prepared following a literature procedure.(29)

Synthesis of (*S*)-4-(*tert*-Butyl)-2-(5-(trifluoromethyl)pyridin-2-yl)-4,5-dihydrooxazole (**1b**)

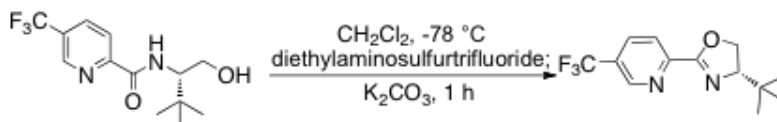



The procedure used for the preparation for the preparation of (*S*)-4-isopropyl-2-(4-methylpyridin-2-yl)-4,5-dihydrooxazole was used except (*S*)-*N*-(1-hydroxy-3-methylbutan-2-yl)-5-(trifluoromethyl)picolinamide (290 mg, 1.0 mmol) was used. The product was purified in the same fashion, to give (*S*)-*N*-(1-hydroxy-3,3-dimethylbutan-2-yl)-5-(trifluoromethyl)picolinamide (230 mg, 85%).  $[\alpha]_D^{20} = -73^\circ$  ( $c = 0.100$ ,  $\text{CHCl}_3$ ).  $R_f = 0.57$  w/ 2:1 hexanes:EtOAc.  $^1\text{H-NMR}$  (300 MHz,  $\text{CDCl}_3$ )  $\delta = 8.95$  (d,  $J = 5.2$  Hz, 1 H), 8.22 (d,  $J = 8.2$  Hz, 1 H), 8.01 (ddd,  $J = 8.2, 2.3, 0.6$  Hz, 1 H), 4.48 (dd,  $J = 10.3, 8.8$  Hz, 1 H), 4.34 (t,  $J = 8.5$  Hz, 1H), 4.16 (dd,  $J = 10.3, 8.4$  Hz, 1 H), 0.98 (s, 9 H).  $^{13}\text{C-NMR}$  (75 MHz,  $\text{CDCl}_3$ )  $\delta = 161.6, 150.2, 146.7$  (q,  $J = 4.0$  Hz) 134.0 (q,  $J = 3.6$  Hz), 128.1 (q,  $J = 33.4$  Hz), 123.4 (q,  $J = 272.7$  Hz), 123.9, 76.9, 69.8, 34.2, 26.1. IR (neat): 2963, 1645, 1399, 1329, 1166, 1127, 1098, 1012, 668  $\text{cm}^{-1}$ . HRMS  $\text{C}_{13}\text{H}_{15}\text{F}_3\text{N}_2\text{O}$  ( $\text{M}+\text{Na}$ ) $^+$  calcd. 295.1034, obsvd. 295.1038.

General procedure for the identification of optimal PyrOx ligand in the asymmetric Heck reaction

Figure 2, use of (*S*)-4-isopropyl-2-(4-methylpyridin-2-yl)-4,5-dihydrooxazole (ligand **S35**)

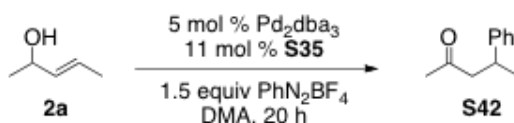

In the dry box, a 1 M solution of (*E*)-pent-3-en-2-ol (**2a**), containing 10 wt% tetradecane, in DMA was prepared. To a 20 mL scintillation vial equipped with a stir bar was added benzenediazonium tetrafluoroborate (14 mg, 0.08 mmol, 1.5 equiv). To a separate vial was added  $\text{Pd}_2\text{dba}_3$  (2 mg, 0.003 mmol, 0.05 equiv). To a separate vial was

added (*S*)-4-isopropyl-2-(4-methylpyridin-2-yl)-4,5-dihydrooxazole (**S35**) (1 mg, 0.006 mmol, 0.11 equiv). To the vial containing palladium was added DMA (0.25 mL), and to the vial containing the ligand was added DMA (0.20 mL). With a pipet, the mixture containing the ligand was added to the mixture containing palladium. With a pipet, the resulting mixture was perturbed several times to ensure mixing, and it was allowed to sit for 10 min. To this mixture was added 50  $\mu$ L of the mixture containing the substrate and tetradecane (0.05 mmol, 1 equiv). This mixture was added to the vial containing the aryldiazonium salt, and the vial was fitted with a lid, removed from the dry box, and stirred for 20 h. The mixture was then passed through a silica gel pipet with diethyl ether, and analyzed for product formation and enantiomeric ratio by gas chromatography. The modifications described below were applied in order to identify the optimal ligand.

## Modifications

**Table S1.** Yield and enantiomeric ratio for the asymmetric Heck reaction of substrate **2a**, using the nine-membered ligand P<sub>yr</sub>Ox ligand library

| Ligand                                            | yield | er        |
|---------------------------------------------------|-------|-----------|
| E = Me, R = Me, <b>S43*</b>                       | NA    | NA        |
| E = Me, R = <i>i</i> Pr, <b>S35</b>               | 38.1  | 91.5:8.5  |
| E = Me, R = <i>t</i> Bu, <b>S36</b>               | 47.7  | 90.0:10   |
| E = Cl, R = Me, <b>S37</b>                        | 27.3  | 64.0:36.0 |
| E = Cl, R = <i>i</i> Pr, <b>S38</b>               | 35.7  | 72.7:27.3 |
| E = Cl, R = <i>t</i> Bu, <b>S39</b>               | 58.7  | 90.9:8.1  |
| E = CF <sub>3</sub> , R = Me, <b>S40</b>          | 25.5  | 63.5:35.5 |
| E = CF <sub>3</sub> , R = <i>i</i> Pr, <b>S41</b> | 43.8  | 70.2:29.8 |
| E = CF <sub>3</sub> , R = <i>t</i> Bu, <b>1a</b>  | 57.4  | 91.5:8.5  |

Yield was calculated by comparing product peak integration to integration of an internal standard using corrected GC analysis. er was determined by comparing enantiomer product peak integrations using chiral GC analysis. \*Ligand was synthetically inaccessible.

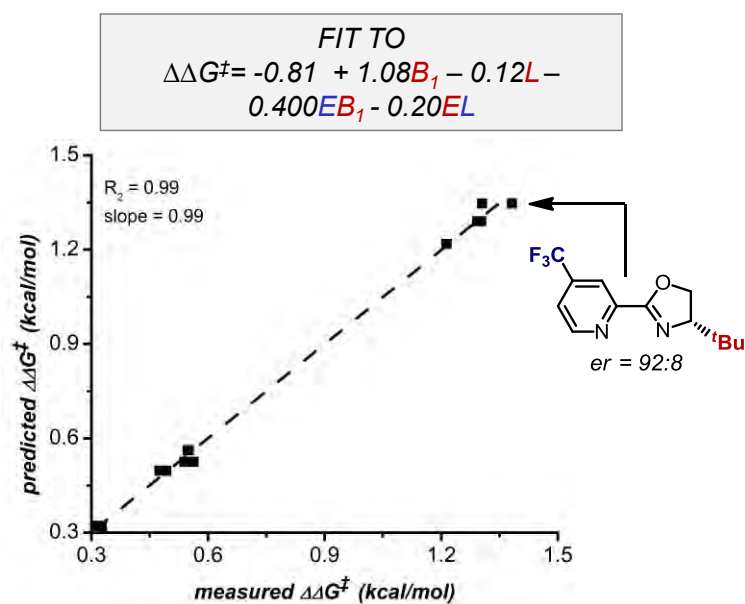

Figure S1. Multi-parameter optimization output.

Optimization of the asymmetric Heck reaction using (S)-4-(tert-butyl)-2-(5-(trifluoromethyl)pyridin-2-yl)-4,5-dihydrooxazole (ligand **1b**)

In the dry box, to a 20 mL scintillation vial equipped with a stir bar was added benzenediazonium tetrafluoroborate (28 mg, 0.15 mmol, 1.5 equiv). To a separate vial was added Pd<sub>2</sub>dba<sub>3</sub> (3 mg, 0.003 mmol, 0.03 equiv). To a separate vial was added (S)-4-(tert-butyl)-2-(5-(trifluoromethyl)pyridin-2-yl)-4,5-dihydrooxazole (**1b**) (2 mg, 0.007 mmol, 0.07 equiv). To the vial containing palladium was added DMA (0.5 mL), and to the vial containing the ligand was added DMA (0.45 mL). With a pipet, the mixture containing the ligand was added to the mixture containing palladium. With a pipet, the resulting mixture was perturbed several times to ensure mixing, and it was allowed to sit for 10 min. To this mixture was added 100 μL of the mixture containing the substrate (**2a**) and tetradecane (0.1 mmol, 1 equiv). This mixture was added to the vial containing the aryldiazonium salt, and the vial was fitted with a lid, removed from the dry box, and stirred for 20 h. The mixture was then passed through a silica gel pipet with diethyl ether, and analyzed for product formation and enantiomeric ratio by gas chromatography. The modifications described below were applied in order to optimize the reaction.

## Modifications

**Table S2.** Optimization of the asymmetric Heck reaction using ligand **1b**

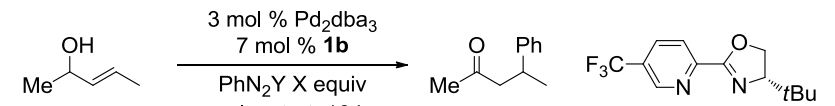

| 2a    |     |                 |         |             | S42    | 1b       |  |
|-------|-----|-----------------|---------|-------------|--------|----------|--|
| entry | X   | Y               | Solvent | %conversion | %yield | er       |  |
| 1     | 1.1 | BF <sub>4</sub> | DMA     | 85.6        | 41.2   | 91.2:8.8 |  |
| 2     | 1.1 | BF <sub>4</sub> | DMF     | 100         | 58.7   | 92.7:7.3 |  |
| 3     | 1.1 | PF <sub>6</sub> | DMF     | 100         | 41.9   | 93.8:6.2 |  |
| 4     | 2.2 | PF <sub>6</sub> | DMF     | 100         | 70.5   | 93.7:6.3 |  |

Yield was calculated by comparing product peak integration to integration of an internal standard using corrected GC analysis. er was determined by comparing enantiomer product peak integrations using chiral GC analysis.

General procedure for the preparation of (*S*)-methyl 4-(4-oxopentan-2-yl) benzoate (**3a**) under optimized conditions (Table 1, entry 1)

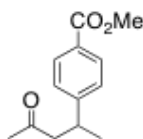

In the dry box, to a 25 mL round-bottom flask equipped with a stir bar was added the aryldiazonium hexafluorophosphate salt (360 mg, 1.1 mmol, 2.2 equiv) derived from methyl-4-aminobenzoate. To a separate vial was added Pd<sub>2</sub>dba<sub>3</sub> (14 mg, 0.02 mmol, 0.03 equiv). To a separate vial was added **1b** (10 mg, 0.04 mmol, 0.07 equiv). To a separate vial was added **2a** (43 mg, 0.5 mmol). To the vial containing palladium was added DMF (2 mL), to the vial containing the ligand was added DMF (2 mL), and to the vial containing the alkene was added DMF (1 mL). With a pipet, the mixture containing the ligand was added to the mixture containing palladium. With a pipet, the resulting mixture was perturbed several times to ensure mixing, and it was allowed to sit for 10 min. To this mixture was added the mixture containing the alkene. The mixture

containing both the catalyst and the alkene was added to the flask containing the aryldiazonium salt, and the flask was fitted with a septum, removed from the dry box, and stirred for 3 h. The mixture was diluted with diethyl ether (10 mL) and water (10 mL). The aqueous layer was extracted with diethyl ether (2 x 15 mL). The combined organic layers were washed with water (3 x 15 mL), brine (1 x 15 mL), and dried over sodium sulfate. The dry organic solution was concentrated under reduced pressure, then purified by silica gel flash chromatography using 3 to 6% acetone in hexanes. The product was isolated as a clear oil in 71-72% yield (78 and 79 mg).  $[\alpha]_D^{20} = +40^\circ$  ( $c = 0.183$ ,  $\text{CHCl}_3$ ).  $R_f = 0.25$  w/ 10% acetone in hexanes.  $^1\text{H-NMR}$  (300 MHz,  $\text{CDCl}_3$ )  $\delta = 7.96$  (d,  $J = 8.4$  Hz, 2 H), 7.28 (d,  $J = 8.1$  Hz, 2 H), 3.90 (s, 3 H), 3.37 (sextet,  $J = 7.0$  Hz, 1 H), 2.73 (m, 2 H), 2.07 (s, 3 H), 1.27 (d,  $J = 6.9$  Hz, 3 H).  $^{13}\text{C-NMR}$  (75 MHz,  $\text{CDCl}_3$ )  $\delta = 207.4$ , 167.2, 151.8, 130.1, 128.5, 127.1, 52.2, 51.7, 35.5, 30.8, 21.9. IR (neat): 2958, 1712, 1610, 1435, 1256, 1163, 1110, 1018, 773, 707  $\text{cm}^{-1}$ . HRMS  $\text{C}_{13}\text{H}_{16}\text{O}_3$  ( $\text{M}+\text{H}$ ) $^+$  calcd. 221.1178, obsvd. 221.1180.

Table 1, entry 2 ((*S*)-4-(4-acetylphenyl)pentan-2-one) (**3b**)

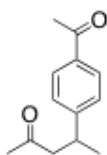

The general procedure for the preparation of **3a** was used with the modifications that the aryldiazonium hexafluorophosphate (330 mg 1.1 mmol, 2.2 equiv) derived from 4-aminoacetophenone was used. Following the aqueous workup described above and concentration, the product was purified by silica gel flash chromatography using 3 to 6% acetone in hexanes to give the product as a clear oil in 64-66% yield (65 mg and 67 mg).

$[\alpha]_D^{20} = + 51^\circ$  ( $c = 0.113$ ,  $\text{CHCl}_3$ ).  $R_f = 0.18$  w/ 10% acetone in hexanes.  $^1\text{H-NMR}$  (300 MHz,  $\text{CDCl}_3$ )  $\delta = 7.89$  (d,  $J = 8.5$  Hz, 2 H), 7.30 (d,  $J = 8.2$  Hz, 2 H), 3.38 (sextet,  $J = 7.0$  Hz, 1 H), 2.82-2.65 (m, 2 H), 2.58 (s, 3 H), 2.08 (s, 3 H), 1.27 (d,  $J = 7.0$  Hz, 3H).  $^{13}\text{C-NMR}$  (75 MHz,  $\text{CDCl}_3$ )  $\delta = 207.3$  197.9, 152.1, 135.6, 128.9, 127.2, 51.6, 35.4, 30.8, 26.8, 22.0. IR (neat): 2963, 2928, 1713, 1677, 1603, 1415, 1358, 1267, 1163, 957, 831, 598  $\text{cm}^{-1}$ . HRMS  $\text{C}_{13}\text{H}_{16}\text{O}_2$  ( $\text{M}+\text{Na}$ ) $^+$  calcd. 227.1048, obsvd. 227.1043.

Table 1, entry 3 ((*S*)-methyl 4-(4-oxododecan-2-yl)benzoate) (**3c**)

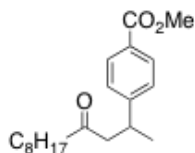

The general procedure for the preparation of **3a** was used with the following modifications. (*E*)-Dodec-2-en-4-ol (73 mg, 0.4 mmol) and the aryldiazonium hexafluorophosphate (280 mg 0.9 mmol, 2.2 equiv) derived from methyl 4-aminobenzoate were used, in a total of 4 mL DMF. Following the aqueous workup described above and concentration, the product was purified by silica gel flash chromatography using 2% acetone in hexanes to give the product as a clear oil in 71-80% yield (91 mg and 102 mg).  $[\alpha]_D^{20} = + 33^\circ$  ( $c = 0.112$ ,  $\text{CHCl}_3$ ).  $R_f = 0.50$  w/ 10% acetone in hexanes.  $^1\text{H-NMR}$  (300 MHz,  $\text{CDCl}_3$ )  $\delta = 7.96$  (d,  $J = 8.4$  Hz, 2H), 7.27 (d,  $J = 8.3$  Hz, 2 H), 3.90 (s, 3 H), 3.39 (sextet,  $J = 7.1$  Hz, 1 H), 2.77-2.60 (m, 2 H), 2.38-2.20 (m, 2 H), 1.48 (pentet,  $J = 7.2$  Hz, 2 H) 1.32-1.16 (m, 13 H), 0.86 (t,  $J = 7.0$  Hz, 3 H).  $^{13}\text{C-NMR}$  (75 MHz,  $\text{CDCl}_3$ )  $\delta = 209.8$ , 167.2, 152.0, 130.1, 128.4, 127.1, 52.2, 50.8, 43.7, 35.5, 32.0, 29.5, 29.3, 29.3, 23.8, 22.8, 21.9, 14.3. IR (neat): 2954, 2926, 2855, 1720, 1611, 1279, 1113, 775, 708  $\text{cm}^{-1}$

<sup>1</sup>. HRMS C<sub>20</sub>H<sub>30</sub>O<sub>3</sub> (M+H)<sup>+</sup> calcd. 319.2273, obsvd. 319.2272.

Table 1, entry 4 ((*S*)-2-(4-acetylphenyl)dodecan-4-one) (**3d**) from (*E*)-alkene

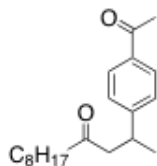

The general procedure for the preparation of **3a** was used with the following modifications. (*E*)-Dodec-2-en-4-ol (73 mg, 0.4 mmol) and the aryldiazonium hexafluorophosphate (280 mg 0.9 mmol, 2.2 equiv) derived from 4-aminoacetophenone were used, in a total of 4 mL DMF. Following the aqueous workup described above and concentration, the product was purified by silica gel flash chromatography using 2% acetone in hexanes to give the product as a clear oil in 67-68% yield (81 mg and 82 mg).  $[\alpha]_D^{20} = +28^\circ$  (c = 28, CHCl<sub>3</sub>). R<sub>f</sub> = 0.44 w/ 10% acetone in hexanes. <sup>1</sup>H-NMR (300 MHz, CDCl<sub>3</sub>) δ = 7.89 (d, *J* = 8.5 Hz, 2H), 7.30 (d, *J* = 8.1 Hz, 2H), 3.40 (sextet, *J* = 7.2 Hz, 1 H), 2.78-2.61 (m, 2 H), 2.58 (s, 3 H), 2.39-2.22 (m, 2 H), 1.49 (pentet, *J* = 6.8 Hz, 2 H), 1.35-1.15 (m, 13 H), 0.86 (t, *J* = 7.0 Hz, 3 H). <sup>13</sup>C-NMR (75 MHz, CDCl<sub>3</sub>) δ = 209.8, 197.9, 152.2, 135.6, 128.9, 127.3, 50.7, 43.7, 35.4, 32.0, 29.5, 29.3, 29.3, 26.8, 23.8, 22.8, 21.9, 14.3. IR (neat): 2956, 2925, 2824, 1713, 1682, 1610, 1557, 1414, 1358, 1267, 830, 599 cm<sup>-1</sup>. HRMS C<sub>20</sub>H<sub>30</sub>O<sub>2</sub> (M+H)<sup>+</sup> calcd. 303.2324, obsvd. 303.2320.

Table 1, entry 5 ((*S*)-4-(4-acetylphenyl)-1-phenylpentan-2-one) (**3e**)

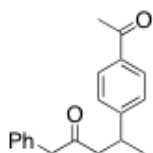



The general procedure for the preparation of **3a** was used with the following modifications. The ligated catalyst mixture contained 10 mg Pd<sub>2</sub>dba<sub>3</sub> (0.011 mmol, 0.03 equiv), and 7 mg ligand **1b** (0.04 mmol, 0.07 equiv). (*E*)-1-phenylpent-3-en-2-ol (57 mg, 0.35 mmol) and the aryldiazonium hexafluorophosphate (230 mg 0.8 mmol, 2.2 equiv) derived from 4-aminoacetophenone were used, in a total of 3.5 mL DMF. Following the aqueous workup described above and concentration, the product was purified by silica gel flash chromatography using 3% acetone in hexanes to give the product as a clear oil in 71-74% yield (70 mg and 73 mg).  $[\alpha]_D^{20} = +10^\circ$  (c = 0.097, CHCl<sub>3</sub>). R<sub>f</sub> = 0.38 w/ 10% acetone in hexanes. <sup>1</sup>H-NMR (300 MHz, CDCl<sub>3</sub>) δ = 7.85 (d, *J* = 8.4 Hz, 2 H), 7.33-7.21 (m, 5 H), 7.10 (dd, *J* = 8.0, 3.0 Hz, 2 H), 3.59 (s, 2 H), 3.67 (sextet, *J* = 7.1 Hz, 1 H), 2.84-2.64 (m, 2 H), 2.57 (s, 3 H), 1.21 (d, *J* = 6.9 Hz, 3 H). <sup>13</sup>C-NMR (75 MHz, CDCl<sub>3</sub>) δ = 206.7, 198.0, 152.0, 135.6, 133.9, 129.6, 128.9, 128.9, 127.3, 127.2, 51.0, 49.7, 35.4, 26.8, 21.8. IR (neat): 3029, 2963, 2928, 1713, 1680, 1607, 1269, 1013, 835, 702 cm<sup>-1</sup>. HRMS C<sub>19</sub>H<sub>20</sub>O<sub>2</sub> (M+Na)<sup>+</sup> calcd. 303.1361, obsvd. 303.1362.

Table 1, entry 6 ((*S*)-methyl 4-(6-methyl-4-oxoheptan-2-yl)benzoate) (**3f**)

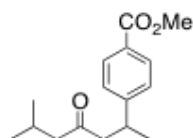

The general procedure for the preparation of **3a** was used with the following modifications. The ligated catalyst mixture contained 10 mg Pd<sub>2</sub>dba<sub>3</sub> (0.01 mmol, 0.03 equiv), and 7 mg ligand **1b** (0.04 mmol, 0.07 equiv). (*E*)-6-methylhept-2-en-4-ol (45 mg, 0.35 mmol) and the aryldiazonium hexafluorophosphate (240 mg 0.8 mmol, 2.2 equiv) derived from methyl 4-aminobenzoate were used, in a total of 3.5 mL DMF. Following

the aqueous workup described above and concentration, the product was purified by silica gel flash chromatography using 2% acetone in hexanes to give the product as a white solid in 65-69% yield (60 mg and 63 mg). This product was the only entry in Tables 4.3-4.5 that was previously known,(33, 34) and had reported the optical rotation of either enantiomer. The optical rotation reported in the literature for (*S*)- methyl 4-(6-methyl-4-oxoheptan-2-yl)benzoate (also known as *ar*-(+)-juvabione) is  $[\alpha]_{\text{D}}^{27} = + 23^{\circ}$  (concentration and solvent not provided). This value was used to assign the absolute configuration of compounds **3a-3m** by analogy.  $[\alpha]_{\text{D}}^{20} = + 27^{\circ}$  ( $c = 0.117$ ,  $\text{CHCl}_3$ ).  $R_f = 0.72$  w/ 10% acetone in hexanes.  $^1\text{H-NMR}$  (300 MHz,  $\text{CDCl}_3$ )  $\delta = 7.96$  (d,  $J = 8.4$  Hz, 2 H), 7.28 (d,  $J = 9.1$  Hz, 2 H), 3.90 (s, 3 H), 3.39 (sextet,  $J = 7.1$  Hz, 1 H), 2.76-2.59 (m, 2 H), 2.26-2.00 (m, 3 H), 1.26 (d,  $J = 7.0$  Hz, 3 H), 0.84 (d,  $J = 6.5$  Hz, 3 H), 0.83 (d,  $J = 6.5$  Hz, 3 H).  $^{13}\text{C-NMR}$  (75 MHz,  $\text{CDCl}_3$ )  $\delta = 209.4, 167.2, 152.0, 130.1, 128.4, 127.1, 52.7, 52.2, 51.3, 35.4, 24.7, 22.7, 21.9$ . IR (neat): 2956, 2872, 1713, 1610, 1435, 1277, 1112, 1012, 856, 774, 708  $\text{cm}^{-1}$ . HRMS  $\text{C}_{16}\text{O}_{22}\text{O}_3$  ( $\text{M}+\text{H}$ ) $^+$  calcd. 263.1647, obsvd. 263.1639.

Table 1, entry 7 ((*S*)-methyl 4-(1-hydroxy-9-methyl-7-oxodecan-5-yl)benzoate) (**3g**)

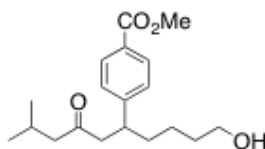

The general procedure for the preparation of **3a** was used with the following modifications. The ligated catalyst mixture contained 10 mg  $\text{Pd}_2\text{dba}_3$  (0.01 mmol, 0.03 equiv), and 7 mg ligand **1b** (0.02 mmol, 0.07 equiv). (*E*)-9-Methyldec-5-ene-1,7-diol (65 mg, 0.35 mmol) and the aryldiazonium hexafluorophosphate (240 mg 0.8 mmol, 2.2

equiv) derived from methyl 4-aminobenzoate were used, in a total of 3.5 mL DMF. The reaction was stirred for 15 h. Following the aqueous workup described above and concentration, the product was purified by silica gel flash chromatography using 10% acetone in hexanes to give the product as a yellow oil in 71-75% yield (80 mg and 84 mg).  $[\alpha]_D^{20} = +14^\circ$  (c = 0.107, CHCl<sub>3</sub>).  $R_f = 0.08$  w/ 10% acetone in hexanes. <sup>1</sup>H-NMR (300 MHz, CDCl<sub>3</sub>)  $\delta = 7.95$  (d,  $J = 8.4$  Hz, 2 H), 7.24 (d,  $J = 8.7$  Hz, 2 H), 3.90 (s, 3 H), 3.58-5.53 (m, 2 H), 3.28-3.18 (m, 1 H), 2.69 (dd,  $J = 7.1, 7.0$  Hz, 2 H), 2.20-1.99 (m, 3 H), 1.69-1.43 (m, 4 H), 1.29-1.05 (m, 3 H), 0.81 (d,  $J = 6.5$  Hz, 3 H), 0.80 (d,  $J = 6.5$  Hz, 3 H). <sup>13</sup>C-NMR (75 MHz, CDCl<sub>3</sub>)  $\delta = 209.5, 167.2, 150.3, 130.0, 128.5, 127.8, 62.8, 52.7, 52.2, 50.2, 41.0, 36.0, 32.7, 24.6, 23.8, 22.7, 22.6$ . IR (neat): 3512, 2953, 2870, 1717, 1610, 1436, 1280, 1113, 774, 668 cm<sup>-1</sup>. HRMS C<sub>19</sub>H<sub>28</sub>O<sub>4</sub> (M+Na)<sup>+</sup> calcd. 343.1885, obsvd. 343.1880.

Table 1, entry 8 ((*S*)-methyl 4-(8-oxododecan-6-yl)benzoate) (**3h**)

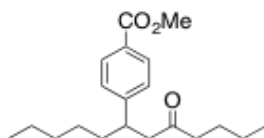

The general procedure for the preparation of **3a** was used with the following modifications. The ligated catalyst mixture contained 10 mg Pd<sub>2</sub>dba<sub>3</sub> (0.01 mmol, 0.03 equiv), and 7 mg ligand **1b** (0.02 mmol, 0.07 equiv). (*E*)-Dodec-6-en-5-ol (65 mg, 0.35 mmol) and the aryldiazonium hexafluorophosphate (240 mg 0.8 mmol, 2.2 equiv) derived from methyl 4-aminobenzoate were used, in a total of 3.5 mL DMF. Following the aqueous workup described above and concentration, the product was purified by silica gel flash chromatography using 1% acetone in hexanes to give the product as a clear oil

in 61-68% yield (68 mg and 76 mg).  $[\alpha]_D^{20} = + 15^\circ$  (c = 0.100, CHCl<sub>3</sub>). R<sub>f</sub> = 0.63 w/ 10% acetone in hexanes. <sup>1</sup>H-NMR (300 MHz, CDCl<sub>3</sub>) δ = 7.95 (d, *J* = 8.5 Hz, 2 H), 7.24 (d, *J* = 8.2 Hz, 2 H), 3.90 (s, 3 H), 3.25-3.16 (m, 1 H), 2.69 (d, *J* = 7.1 Hz, 2 H), 2.35-2.15 (m, 2 H), 1.67-1.42 (m, 4 H), 1.35-1.00 (m, 8 H), 0.82 (q, *J* = 7.0 Hz, 6 H). <sup>13</sup>C-NMR (75 MHz, CDCl<sub>3</sub>) δ = 210.0, 167.3, 150.6, 130.0, 128.4, 127.8, 52.2, 50.0, 43.8, 41.3, 36.1, 31.4, 29.7, 23.4, 22.7, 22.6, 14.1, 14.1. IR (neat): 2955, 2930, 2859, 1721, 1610, 1279, 1113 cm<sup>-1</sup>. HRMS C<sub>20</sub>H<sub>30</sub>O<sub>3</sub> (M+H)<sup>+</sup> calcd. 319.2273, obsvd. 319.2272.

Table 1, entry 9 ((*S*)-2-methyl-5-(4-nitrophenyl)hexan-3-one (**3i**) from (*E*)-alkene)

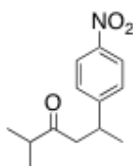

The general procedure for the preparation of **3a** was used with the following modifications. The ligated catalyst mixture contained 14 mg Pd<sub>2</sub>dba<sub>3</sub> (0.011 mmol, 0.03 equiv), and 10 mg ligand **1b** (0.04 mmol, 0.07 equiv). (*E*)-2-methylhex-4-en-3-ol (57 mg, 0.5 mmol) and the aryldiazonium hexafluorophosphate (330 mg 1.1 mmol, 2.2 equiv) derived from 4-nitroaniline were used, in a total of 5 mL DMF. Following the aqueous workup described above and concentration, the product was purified by silica gel flash chromatography using 4% acetone in hexanes to give the product as a clear oil in 58-59% yield (68 mg and 69 mg).  $[\alpha]_D^{20} = + 24^\circ$  (c = 0.100, CHCl<sub>3</sub>). R<sub>f</sub> = 0.36 w/ 10% acetone in hexanes. <sup>1</sup>H-NMR (300 MHz, CDCl<sub>3</sub>) δ = 8.25 (d, *J* = 8.8 Hz, 2 H), 7.38, (d, *J* = 8.7 Hz, 2 H), 3.48 (sextet, *J* = 7.0 Hz, 1 H), 2.84-2.69 (m, 2 H), 2.50 (septet, *J* = 7.0 Hz, 1 H), 1.28 (d, *J* = 7.0 Hz, 3 H), 1.05 (d, *J* = 6.9 Hz, 3 H), 0.99 (d, *J* = 7.0 Hz, 3 H). <sup>13</sup>C-

NMR (75 MHz, CDCl<sub>3</sub>)  $\delta$  = 212.6, 154.5, 129.2, 128.0, 124.0, 48.3, 41.4, 35.1, 21.8, 18.2, 18.1. IR (neat): 2969, 2933, 1710, 1599, 1517, 1345, 1110, 1008, 855, 700 cm<sup>-1</sup>. HRMS C<sub>13</sub>H<sub>17</sub>NO<sub>3</sub> (M)<sup>+</sup> calcd. 235.1208, obsvd. 235.1212.

Table 1, entry 10 ((*R*)-2-(4-acetylphenyl)dodecan-4-one) (**3d**) from (*Z*)-alkene

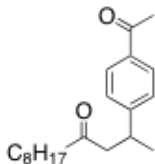

The general procedure for the preparation of **3a** was used with the following modifications. The ligated catalyst mixture contained 15 mg Pd<sub>2</sub>dba<sub>3</sub> (0.02 mmol, 0.04 equiv), and 10 mg ligand **1b** (0.04 mmol, 0.09 equiv). (*Z*)-Dodec-2-en-4-ol (73 mg, 0.4 mmol) and the aryldiazonium hexafluorophosphate (280 mg 0.9 mmol, 2.2 equiv) derived from 4-aminoacetophenone were used, in a total of 4 mL DMF. The mixture was stirred for 15 h. Following the aqueous workup described above and concentration, the product was purified by silica gel flash chromatography using 2% acetone in hexanes to give the product as a clear oil in 74-75% yield (90 mg and 92 mg).  $[\alpha]_D^{20} = -28^\circ$  (c = 0.114, CHCl<sub>3</sub>). The <sup>1</sup>H NMR spectrum, see below, was compared with that of the product arising from the (*E*)-isomer of the same alkene.

Table 1, entry 11 ((*R*)-2-methyl-5-(4-nitrophenyl)hexan-3-one) (**3i**) from (*Z*)-alkene)

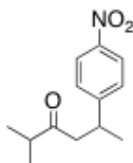

The general procedure for the preparation of **3a** was used with the following modifications. The ligated catalyst mixture contained 18 mg Pd<sub>2</sub>dba<sub>3</sub> (0.02 mmol, 0.04 equiv), and 12 mg ligand **1b** (0.05 mmol, 0.09 equiv). (*E*)-Methylhex-4-en-3-ol (57 mg, 0.5 mmol) and the aryldiazonium hexafluorophosphate (330 mg 1.1 mmol, 2.2 equiv) derived from 4-nitroaniline were used, in a total of 5 mL DMF. The reaction was stirred for 24 h. Following the aqueous workup described above and concentration, the product was purified by silica gel flash chromatography using 4% acetone in hexanes to give the product as a clear oil in 70-80% yield (82 mg and 94 mg).  $[\alpha]_D^{20} = -24^\circ$  (c = 0.117, CHCl<sub>3</sub>). The <sup>1</sup>H NMR spectrum, see below, was compared to that of the product arising from the (*E*)-isomer of the same alkene.

Table 1, entry 12 ((*R*)-2-(3-iodophenyl)dodecan-4-one) (**3j**)

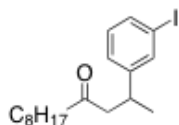

The general procedure for the preparation of **3a** was used with the following modifications. The ligated catalyst mixture contained 13 mg Pd<sub>2</sub>dba<sub>3</sub> (0.01 mmol, 0.04 equiv), and 9 mg ligand **1b** (0.03 mmol, 0.09 equiv). (*Z*)-Dodec-2-en-4-ol (65 mg, 0.35 mmol) and the aryldiazonium hexafluorophosphate (300 mg 0.8 mmol, 2.2 equiv) derived from 3-iodoaniline one were used, in a total of 3.5 mL DMF. The mixture was stirred for 15 h. Following the aqueous workup described above and concentration, the product was purified by silica gel flash chromatography using 1% acetone in hexanes to give the product as a yellow oil in 85-88% yield (115 mg and 119 mg).  $[\alpha]_D^{20} = -21^\circ$  (c = 0.213, CHCl<sub>3</sub>). R<sub>f</sub> = 0.71 w/ 10% acetone in hexanes. <sup>1</sup>H-NMR (300 MHz, CDCl<sub>3</sub>)  $\delta$  = 7.55-

7.50 (m, 2 H), 7.17 (d,  $J = 7.8$  Hz, 1 H), 7.02 (t,  $J = 7.7$  Hz, 1 H), 3.26 (sextet,  $J = 7.1$  Hz, 1 H), 2.73-2.56 (m, 2 H), 2.39-2.22 (m, 2 H), 1.50 (pentet,  $J = 7.1$  Hz, 2 H), 1.36-1.06 (m, 3 H), 0.87 (t,  $J = 7.0$  Hz, 3 H).  $^{13}\text{C-NMR}$  (75 MHz,  $\text{CDCl}_3$ )  $\delta = 209.8, 149.1, 136.0, 135.5, 130.4, 126.5, 94.8, 50.9, 43.8, 35.1, 32.0, 29.5, 29.3, 29.3, 23.8, 22.8, 22.0, 14.3$ . IR (neat): 2955, 2925, 2854, 1714, 1563, 1465, 994, 782, 696  $\text{cm}^{-1}$ . HRMS  $\text{C}_{18}\text{H}_{27}\text{IO}$  ( $\text{M}+\text{H}$ ) $^+$  calcd. 387.1185, obsvd. 387.1194.

Table 1, entry 13 ((+)-methyl 4-(4-oxo-4-phenylbutan-2-yl)benzoate) (**3k**)

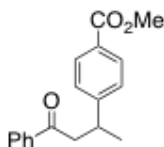

The general procedure for the preparation of **3a** was used with the following modifications. The ligated catalyst mixture contained 14 mg  $\text{Pd}_2\text{dba}_3$  (0.02 mmol, 0.03 equiv), and 10 mg ligand **1b** (0.04 mmol, 0.07 equiv). (*Z*)-1-Phenylbut-2-en-1-ol (89 mg, 0.5 mmol) and the aryldiazonium hexafluorophosphate (350 mg 1.1 mmol, 2.2 equiv) derived from methyl 4-aminobenzoate were used, in a total of 5 mL DMF. The mixture was stirred for 15 h. Following the aqueous workup described above and concentration, the product was purified by silica gel flash chromatography using 1% acetone in hexanes to give the product as a white solid in 50-53% yield (71 mg and 75 mg). This product could not be fully purified, and the characterization data that follows pertains to a mixture of the desired product and unknown impurities.  $[\alpha]_D^{20} = + 7^\circ$  ( $c = 0.097$ ,  $\text{CHCl}_3$ ).  $R_f = 0.38$  w/ 10% acetone in hexanes.  $^1\text{H-NMR}$  (300 MHz,  $\text{CDCl}_3$ )  $\delta = 7.98-7.90$  (m, 4 H), 7.58-7.53 (m, 1 H), 7.47-7.42 (m, 2 H), 7.36-7.33 (m, 2 H). 3.59 (s, 3 H), 3.62-3.55 (m, 1 H), 3.59-3.17 (m, 2 H), 1.35 (d,  $J = 7.0$  Hz, 3 H).  $^{13}\text{C-NMR}$  (75 MHz,  $\text{CDCl}_3$ )  $\delta = 198.7,$

167.2, 152.1, 137.2, 133.3, 130.1, 128.8, 128.2, 127.2, 120.4, 52.2, 46.7, 35.7, 22.0. IR (neat): 2953, 1716, 1684, 1610, 1435, 1276, 1111, 1000, 753, 691  $\text{cm}^{-1}$ . HRMS  $\text{C}_{18}\text{H}_{18}\text{O}_3$   $(\text{M}+\text{H})^+$  calcd. 283.1334, obsvd. 283.1328.

Table 1, entry 14 ((*S*)-methyl 4-(2-oxoheptan-4-yl)benzoate) (**31**)

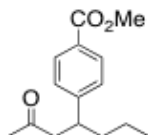

The general procedure for the preparation of **3a** was used with the following modifications. The ligated catalyst mixture contained 14 mg  $\text{Pd}_2\text{dba}_3$  (0.02 mmol, 0.03 equiv), and 10 mg ligand **1b** (0.04 mmol, 0.07 equiv). (*E*)-Hept-3-en-2-ol (57 mg, 0.5 mmol) and the aryldiazonium hexafluorophosphate (350 mg 1.1 mmol, 2.2 equiv) derived from methyl 4-aminobenzoate were used, in a total of 5 mL DMF. Following the aqueous workup described above and concentration, the product was purified by silica gel flash chromatography using 5% acetone in hexanes to give the product as a colorless oil in 70-77% yield (87 mg and 96 mg).  $[\alpha]_{\text{D}}^{20} = +21^\circ$  ( $c = 0.123$ ,  $\text{CHCl}_3$ ).  $R_f = 0.39$  w/10% acetone in hexanes.  $^1\text{H-NMR}$  (300 MHz,  $\text{CDCl}_3$ )  $\delta = 7.95$  (d,  $J = 8.4$  Hz, 2 H), 7.25 (d,  $J = 7.7$  Hz, 2 H), 3.89 (s, 3 H), 3.26-3.16 (m, 1 H), 2.73 (d,  $J = 7.1$  Hz, 2 H), 2.03 (s, 3 H), 1.65-1.48 (m, 2 H), 1.25-1.04 (m, 2 H), 0.84 (t,  $J = 7.3$  Hz, 3 H).  $^{13}\text{C-NMR}$  (75 MHz,  $\text{CDCl}_3$ )  $\delta = 207.5, 167.2, 150.4, 130.0, 128.5, 127.7, 52.2, 50.6, 41.0, 38.6, 30.8, 20.6, 14.1$ . IR (neat): 2956, 2931, 2872, 1719, 1610, 1436, 1729, 1113, 773, 668  $\text{cm}^{-1}$ . HRMS  $\text{C}_{15}\text{H}_{20}\text{O}_3$   $(\text{M}+\text{H})^+$  calcd. 249.1491, obsvd. 249.1492.



Table 1, entry 15 ((*R*)-methyl 4-(1-methoxy-9-methyl-1,7-dioxodecan-5-yl)benzoate)  
**(3m)**

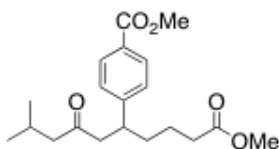

The general procedure for the preparation of **3a** was used with the following modifications. The ligated catalyst mixture contained 11 mg Pd<sub>2</sub>dba<sub>3</sub> (0.01 mmol, 0.04 equiv), and 7 mg ligand **1b** (0.03 mmol, 0.09 equiv). (*Z*)-Methyl 7-hydroxy-9-methyldec-5-enoate (64 mg, 0.3 mmol) and the aryldiazonium hexafluorophosphate (210 mg 0.7 mmol, 2.2 equiv) derived from methyl 4-aminobenzoate were used, in a total of 3 mL DMF. The reaction was stirred for 22 h. Following the aqueous workup described above and concentration, the product was purified by silica gel flash chromatography using 3% acetone in hexanes to give the product as a clear oil in 78-88% yield (82 mg and 92 mg).  $[\alpha]_D^{20} = -10^\circ$  (c = 0.097, CHCl<sub>3</sub>).  $R_f = 0.48$  w/ 10% acetone in hexanes. <sup>1</sup>H-NMR (300 MHz, CDCl<sub>3</sub>)  $\delta = 7.92$  (d,  $J = 8.4$  Hz, 2 H), 7.22 (d,  $J = 8.2$  Hz, 2 H), 3.87 (s, 3 H), 3.59 (s, 3 H), 3.25-3.15 (m, 1 H), 2.66 (dd,  $J = 7.3, 6.9$  Hz, 2 H), 2.24 – 1.93 (m, 5 H), 1.65-1.34 (m, 4 H), 0.77 (d,  $J = 6.5$  Hz, 3 H), 0.76 (d,  $J = 6.6$  Hz, 3 H). <sup>13</sup>C-NMR (75 MHz, CDCl<sub>3</sub>)  $\delta = 209.2, 173.9, 167.2, 149.9, 130.1, 128.6, 127.8, 52.7, 52.2, 51.7, 50.1, 40.8, 35.6, 33.9, 24.6, 22.9, 22.7, 22.6$ . IR (neat): 2954, 1718, 1653, 1436, 1281, 1182, 1112, 668 cm<sup>-1</sup>. HRMS C<sub>20</sub>H<sub>28</sub>O<sub>5</sub> (M+H)<sup>+</sup> calcd. 349.2015, obsvd. 349.2018.

Table 2, entry 1 ((+)-methyl 4-(6-oxoheptan-3-yl)benzoate) (**4a**) from (*Z*)-alkene

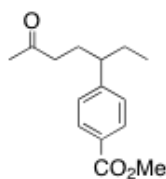

The general procedure for the preparation of **3a** was used with the following modifications. The ligated catalyst mixture contained 14 mg Pd<sub>2</sub>dba<sub>3</sub> (0.02 mmol, 0.03 equiv), and 10 mg ligand **1b** (0.04 mmol, 0.07 equiv). (*Z*)-Hept-4-en-2-ol (57 mg, 0.5 mmol) and the aryldiazonium hexafluorophosphate (350 mg 1.1 mmol, 2.2 equiv) derived from methyl 4-aminobenzoate were used, in a total of 5 mL DMF. The reaction was stirred for 15 h. Following the aqueous workup described above and concentration, the product was purified by silica gel flash chromatography using 5% acetone in hexanes to give the product as a clear oil in 79% yield (98 mg and 98 mg). The  $\gamma$ -isomer shown was isolated along with approximately 3% of the  $\beta$ -isomer.  $[\alpha]_D^{20} = +4^\circ$  ( $c = 0.113$ , CHCl<sub>3</sub>).  $R_f = 0.39$  w/ 10% acetone in hexanes. <sup>1</sup>H-NMR (300 MHz, CDCl<sub>3</sub>)  $\delta = 7.97$  (d,  $J = 8.4$  Hz, 2 H), 7.19 (d,  $J = 8.1$  Hz, 2 H), 3.91 (s, 3 H), 2.52-2.43 (m, 1 H), 2.33-2.13 (m, 2 H), 2.07-1.93 (m, 4 H), 1.82-1.51 (m, 3 H), 0.75 (t,  $J = 7.3$  Hz, 3 H). <sup>13</sup>C-NMR (75 MHz, CDCl<sub>3</sub>)  $\delta = 209.0, 167.2, 150.6, 129.9, 128.4, 127.9, 52.2, 47.3, 41.7, 30.1, 30.0, 30.0, 12.2$ . IR (neat): 2958, 1718, 1609, 1436, 1280, 1113, 776, 709 cm<sup>-1</sup>. HRMS C<sub>15</sub>H<sub>20</sub>O<sub>3</sub> (M+H)<sup>+</sup> calcd. 249.1491, obsvd. 249.1488.

Table 2, entry 2 ((-)-methyl 4-(6-oxoheptan-3-yl)benzoate) (**4a**) from (*E*)-alkene

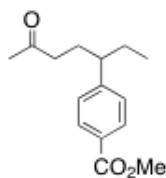

The general procedure for the preparation of **3a** was used with the following modifications. The ligated catalyst mixture contained 14 mg Pd<sub>2</sub>dba<sub>3</sub> (0.02 mmol, 0.03 equiv), and 10 mg ligand **1b** (0.04 mmol, 0.07 equiv). (*E*)-Hept-4-en-2-ol (57 mg, 0.5 mmol) and the aryldiazonium hexafluorophosphate (350 mg 1.1 mmol, 2.2 equiv) derived from methyl 4-aminobenzoate were used, in a total of 5 mL DMF. The reaction was stirred for 15 h. Following the aqueous workup described above and concentration, the product was purified by silica gel flash chromatography using 5% acetone in hexanes to give the product as a colorless oil in 56-59% yield (70 mg and 73 mg).  $[\alpha]_D^{20} = -4^\circ$  (c = 0.09, CHCl<sub>3</sub>). The  $\gamma$ -isomer shown was isolated along with approximately 14% of the  $\beta$ -isomer. The <sup>1</sup>H NMR spectrum, see below, was compared to that of the product arising from the (*Z*)-isomer of the same alkene.

Table 2, entry 3 ((+)-5-(*p*-tolyl)heptan-2-one) (**4b**)

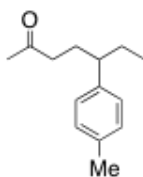

The general procedure for the preparation of **3a** was used with the following modifications. The ligated catalyst mixture contained 14 mg Pd<sub>2</sub>dba<sub>3</sub> (0.02 mmol, 0.03 equiv), and 10 mg ligand **1b** (0.04 mmol, 0.07 equiv). (*Z*)-Hept-4-en-2-ol (57 mg, 0.5 mmol) and the aryldiazonium hexafluorophosphate (320 mg 1.1 mmol, 2.2 equiv) derived from *p*-toluidine were used, in a total of 5 mL DMF. The reaction was stirred for 15 h. Following the aqueous workup described above and concentration, the product was purified by silica gel flash chromatography using 1% acetone in hexanes to give the

product as a colorless oil in 70-74% yield (72 mg and 76 mg).  $[\alpha]_D^{20} = + 2^\circ$  ( $c = 0.120$ ,  $\text{CHCl}_3$ ). The  $\gamma$ -isomer shown was isolated along with approximately 10% of the  $\beta$ -isomer.  $R_f = 0.50$  w/ 10% acetone in hexanes.  $^1\text{H-NMR}$  (300 MHz,  $\text{CDCl}_3$ )  $\delta = 7.12$ - $7.07$  (m, 2 H),  $7.01$ - $6.99$  (m, 2 H),  $2.38$ - $2.17$  (m, 6 H),  $2.03$ - $1.91$  (m, 4 H),  $1.78$ - $1.50$  (m, 3 H),  $0.77$  (t,  $J = 7.4$  Hz, 3 H).  $^{13}\text{C-NMR}$  (75 MHz,  $\text{CDCl}_3$ )  $\delta = 209.5$ ,  $141.8$ ,  $135.8$ ,  $129.3$ ,  $127.8$ ,  $47.0$ ,  $42.1$ ,  $30.3$ ,  $30.2$ ,  $30.1$ ,  $21.2$ ,  $12.4$ . IR (neat):  $2960$ ,  $2926$ ,  $2873$ ,  $1717$ ,  $1514$ ,  $1357$ ,  $1161$ ,  $816$ ,  $668$   $\text{cm}^{-1}$ . HRMS  $\text{C}_{14}\text{H}_{20}\text{O}$  ( $\text{M}+\text{Na}$ ) $^+$  calcd.  $227.1412$ , obsvd.  $227.1413$ .

Table 2, entry 4 ((+)-methyl 4-(7-oxo-8-phenyloctan-4-yl)benzoate) (**4c**)

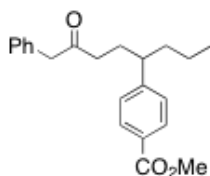

The general procedure for the preparation of **3a** was used with the following modifications. The ligated catalyst mixture contained 11 mg  $\text{Pd}_2\text{dba}_3$  (0.01 mmol, 0.03 equiv), and 8 mg ligand **1b** (0.03 mmol, 0.07 equiv). (*E*)-1-Phenyloct-3-en-2-ol (82 mg, 0.4 mmol) and the aryldiazonium hexafluorophosphate (280 mg 0.9 mmol, 2.2 equiv) derived from methyl 4-aminobenzoate were used, in a total of 4 mL DMF. The reaction was stirred for 15 h. Following the aqueous workup described above and concentration, the product was purified by silica gel flash chromatography using 3% acetone in hexanes to give the product as a colorless oil in 64-68% yield (87 mg and 92 mg).  $[\alpha]_D^{20} = + 5^\circ$  ( $c = 0.107$ ,  $\text{CHCl}_3$ ).  $R_f = 0.39$  w/ 10% acetone in hexanes.  $^1\text{H-NMR}$  (300 MHz,  $\text{CDCl}_3$ )  $\delta = 7.92$  (d,  $J = 8.4$  Hz, 2 H),  $7.32$ - $7.25$  (m, 4 H),  $7.11$ - $7.07$  (m, 3 H),  $3.91$  (s, 3 H),  $3.55$  (s, 2 H),  $2.57$ - $2.46$  (m, 1 H),  $2.32$ - $2.16$  (m, 2 H),  $2.03$ - $1.92$  (m, 1 H),  $1.76$ - $1.54$  (m, 3 H),  $1.25$ -

1.00 (m, 2 H), 0.80 (t,  $J = 7.3$  Hz, 3 H).  $^{13}\text{C}$ -NMR (75 MHz,  $\text{CDCl}_3$ )  $\delta = 208.2, 167.3, 150.8, 134.3, 130.0, 129.5, 128.9, 128.4, 127.9, 127.2, 52.2, 50.4, 45.1, 39.9, 39.1, 30.3, 20.7, 14.2$ . IR (neat): 2954, 2929, 2871, 1719, 1609, 1436, 1280, 1123, 774, 700, 668  $\text{cm}^{-1}$ . HRMS  $\text{C}_{22}\text{H}_{26}\text{O}_3$  ( $\text{M}+\text{Na}$ ) $^+$  calcd. 361.1780, obsvd. 362.2784.

Table 2, entry 5 ((+)-methyl 4-(5-hydroxypentan-2-yl)benzoate derived from corresponding aldehyde, **4d**)

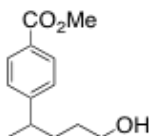

The general procedure for the preparation of **3a** was used with the following modifications. The ligated catalyst mixture contained 14 mg  $\text{Pd}_2\text{dba}_3$  (0.02 mmol, 0.03 equiv), and 10 mg ligand **1b** (0.04 mmol, 0.07 equiv). (*E*)-Pent-3-en-1-ol (43 mg, 0.5 mmol) and the aryldiazonium hexafluorophosphate (350 mg 1.1 mmol, 2.2 equiv) derived from methyl 4-aminobenzoate were used, in a total of 5 mL DMF. The reaction was stirred for 15 h. Following the aqueous workup described above and concentration, the product was purified by silica gel flash chromatography using 3% acetone in hexanes containing 0.1 % triethylamine to give an aldehyde product as a colorless oil in 67-74% yield (74 mg and 81 mg). This product was dissolved in MeOH, (3 mL) in a 20 mL scintillation vial equipped with a stir bar. The mixture was cooled to 0 °C. Sodium borohydride (19 mg, 0.5 mmol, 1.5 equiv) was added, and the resulting mixture was stirred for 30 min. The solvent was removed under reduced pressure, and the resulting residue was transferred to a separatory funnel using diethyl ether (10 mL) and water (10 mL). The aqueous layer was extracted with diethyl ether (2 x 15 mL), and the combined

organic layers were washed with water (2 x 10 mL), and brine (1 x 10 mL). The organic layer was then dried over sodium sulfate, and concentrated under reduced pressure. The resulting mixture was purified using silica gel flash chromatography using 7% acetone in hexanes to give the alcohol product. The product was isolated along with regioisomeric products.  $[\alpha]_D^{20} = +10^\circ$  (c = 0.125, CHCl<sub>3</sub>).  $R_f = 0.33$  w/ 20% acetone in hexanes. <sup>1</sup>H-NMR (300 MHz, CDCl<sub>3</sub>) (major product)  $\delta$  7.99-7.95 (m, 2 H), 7.27-7.24 (m, 2 H), 3.90 (s, 3 H), 3.60 (t,  $J = 6.6$  Hz, 2 H), 2.78 (sextet,  $J = 6.9$  Hz, 1 H), 1.75-1.37 (m, 4 H), 1.27 (d,  $J = 7$  Hz, 3 H). <sup>13</sup>C-NMR (75 MHz, CDCl<sub>3</sub>) (all resonances)  $\delta = 153.1, 130.1, 130.0, 129.9, 129.8, 128.2, 128.0, 127.3, 127.3, 126.3, 125.9, 125.7, 63.1, 62.4, 61.1, 52.2, 48.0, 44.4, 40.1, 39.2, 3.1, 24.4, 32.6, 31.0, 29.8, 24.1, 22.3, 12.2$ . IR (neat): 3420, 2954, 1719, 1436, 1280, 1114, 773, 668 cm<sup>-1</sup>. HRMS C<sub>13</sub>H<sub>18</sub>O<sub>3</sub> (M+Na)<sup>+</sup> calcd. 245.1154, obsvd. 245.1137.

Table 2, entry 6 ((+)-4-(4-methoxyphenyl)hexanal) (**4e**)

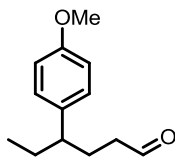

The general procedure for the preparation of **3a** was used with the following modifications. The ligated catalyst mixture contained 14 mg Pd<sub>2</sub>dba<sub>3</sub> (0.02 mmol, 0.03 equiv), and 10 mg ligand **1b** (0.04 mmol, 0.07 equiv). (*Z*)-Hex-3-en-1-ol (50 mg, 0.5 mmol) and the aryldiazonium hexafluorophosphate (308 mg 1.1 mmol, 2.2 equiv) derived from *p*-anisidine were used, in a total of 5 mL DMF. The reaction was stirred for 15 h. Following the aqueous workup described above and concentration, the product was purified by silica gel flash chromatography using 3% acetone in hexanes containing 0.1

% triethylamine to give an aldehyde product as a colorless oil in 73% yield (75 mg). The product **4e** was isolated along with regioisomeric product.  $[\alpha]_D^{20} = + 4^\circ$  (c = 0.090, CHCl<sub>3</sub>). R<sub>f</sub> = 0.52 w/ 20% acetone in hexanes. <sup>1</sup>H-NMR (300 MHz, CDCl<sub>3</sub>) δ = 9.64 (t, *J* = 1.5 Hz, 1 H), 7.03 (d, *J* = 8.7 Hz, 2 H), 6.84 (d, *J* = 8.7 Hz, 2 H), 3.79 (s, 3 H), 2.42–2.28 (m, 1 H), 2.30–2.23 (m, 2 H), 2.06–1.95 (m, 1 H), 1.83–1.53 (m, 3 H), 0.77 (t, *J* = 7.5 Hz, 3 H). <sup>13</sup>C-NMR (75 MHz, CDCl<sub>3</sub>) δ = 202.6, 158.1, 136.1, 128.5, 113.8, 55.1, 46.3, 42.2, 29.8, 28.7, 12.1. IR (neat): 2957, 1721, 1610, 1510, 1245, 1177, 1034, 829 cm<sup>-1</sup>. HRMS (M+H)<sup>+</sup> calcd. 207.1385, obsvd. 207.1390.

In order to determine the er of the product, the corresponding primary alcohol was prepared by the following protocol. This product, **4e** was dissolved in MeOH, (3 mL) in a 20 mL scintillation vial equipped with a stir bar. The mixture was cooled to 0 °C. Sodium borohydride (19 mg, 0.5 mmol, 1.5 equiv) was added, and the resulting mixture was stirred for 30 min. The solvent was removed under reduced pressure, and the resulting residue was transferred to a separatory funnel using diethyl ether (10 mL) and water (10 mL). The aqueous layer was extracted with diethyl ether (2 x 15 mL), and the combined organic layers were washed with water (2 x 10 mL), and brine (1 x 10 mL). The organic layer was then dried over sodium sulfate, and concentrated under reduced pressure. The resulting mixture was purified using silica gel flash chromatography using 7% acetone in hexanes to give the alcohol product, **4ea**. The product was isolated along with regioisomeric products.  $[\alpha]_D^{20} = + 7^\circ$  (c = 0.130, CHCl<sub>3</sub>). R<sub>f</sub> = 0.40 w/ 20% acetone in hexanes. <sup>1</sup>H-NMR (300 MHz, CDCl<sub>3</sub>) 7.03 (d, *J* = 8.7 Hz, 2 H), 6.83 (d, *J* = 8.7 Hz, 2 H), 3.79 (s, 3 H), 3.57 (t, *J* = 6.3 Hz, 2 H), 2.42–2.31 (m, 1 H), 1.81–1.34 (m, 6 H), 0.76 (t, *J* = 7.5 Hz, 3 H). <sup>13</sup>C-NMR (75 MHz, CDCl<sub>3</sub>) δ = 157.7, 137.4, 128.5, 113.6, 63.1,

55.2, 46.8, 32.7, 30.9, 29.9, 12.2. IR (neat): 2929, 1611, 1511, 1457, 1245, 1036, 829, 681  $\text{cm}^{-1}$ . HRMS (M+Na)<sup>+</sup> calcd. 231.1361, obsvd. 231.1362.

Table 2, entry 7 ((+)-4-(4-acetylphenyl)hexanal) (**4f**)

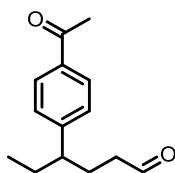

The general procedure for the preparation of **3a** was used with the following modifications. The ligated catalyst mixture contained 14 mg Pd<sub>2</sub>dba<sub>3</sub> (0.02 mmol, 0.03 equiv), and 10 mg ligand **1b** (0.04 mmol, 0.07 equiv). (*Z*)-Hex-3-en-1-ol (50 mg, 0.5 mmol) and the aryldiazonium hexafluorophosphate (321 mg 1.1 mmol, 2.2 equiv) derived from 4-aminoacetophenone were used, in a total of 5 mL DMF. The reaction was stirred for 15 h. Following the aqueous workup described above and concentration, the product was purified by silica gel flash chromatography using 3% acetone in hexanes containing 0.1 % triethylamine to give an aldehyde product as a colorless oil in 71% yield (77 mg).  $[\alpha]_D^{20} = + 7^\circ$  (c = 0.10, CHCl<sub>3</sub>). R<sub>f</sub> = 0.40 w/ 20% acetone in hexanes. <sup>1</sup>H-NMR (300 MHz, CDCl<sub>3</sub>)  $\delta$  = 9.66 (t, *J* = 1.5 Hz, 1 H), 7.90 (d, *J* = 8.1 Hz, 2 H), 7.22 (d, *J* = 8.1 Hz, 2 H), 2.58 (s, 3 H), 2.55–2.48 (m, 1 H), 2.28–2.24 (m, 2 H), 2.12–2.03 (m, 1 H), 1.90–1.57 (m, 3 H), 0.77 (t, *J* = 7.5 Hz, 3 H). <sup>13</sup>C-NMR (75 MHz, CDCl<sub>3</sub>)  $\delta$  = 202.0, 197.8, 150.2, 135.6, 128.7, 127.9, 47.1, 42.0, 29.5, 28.2, 26.6, 12.0. IR (neat): 2961, 1721, 1680, 1606, 1415, 1266, 1113, 733, 600  $\text{cm}^{-1}$ . HRMS (M+H)<sup>+</sup> calcd. 219.1385, obsvd. 219.1390.

In order to determine the er of the product, the corresponding primary alcohol was prepared by the following protocol. This product, **4f** was dissolved in MeOH, (3 mL) in



a 20 mL scintillation vial equipped with a stir bar. The mixture was cooled to 0 °C. Sodium borohydride (19 mg, 0.5 mmol, 1.5 equiv) was added, and the resulting mixture was stirred for 30 min. The solvent was removed under reduced pressure, and the resulting residue was transferred to a separatory funnel using diethyl ether (10 mL) and water (10 mL). The aqueous layer was extracted with diethyl ether (2 x 15 mL), and the combined organic layers were washed with water (2 x 10 mL), and brine (1 x 10 mL). The organic layer was then dried over sodium sulfate, and concentrated under reduced pressure. The resulting mixture was purified using silica gel flash chromatography using 7% acetone in hexanes to give the alcohol product, **4fa**. The product was isolated along with regioisomeric products.  $[\alpha]_D^{20} = +14^\circ$  (c = 0.099, CHCl<sub>3</sub>). R<sub>f</sub> = 0.36 w/ 20% acetone in hexanes. <sup>1</sup>H-NMR (300 MHz, CDCl<sub>3</sub>) δ = 7.90 (d, *J* = 8.4 Hz, 2 H), 7.24 (d, *J* = 8.4 Hz, 2 H), 3.58 (t, *J* = 6.3 Hz, 2 H), 2.59 (s, 3H), 2.54–2.46 (m, 1 H), 1.83–1.26 (m, 6 H), 0.77 (t, *J* = 7.5 Hz, 3 H). <sup>13</sup>C-NMR (75 MHz, CDCl<sub>3</sub>) δ = 198.0, 151.5, 135.2, 128.5, 127.9, 62.8, 47.8, 32.3, 30.7, 29.5, 26.5, 12.1. IR (neat): 2958, 1677, 1605, 1415, 1268, 1059, 834, 601 cm<sup>-1</sup>. HRMS (M+H)<sup>+</sup> calcd. 221.1542, obsvd. 221.1538.

Table 2, entry 8 ((+)-methyl 4-(6-oxohexan-3-yl)benzoate (**4g**))

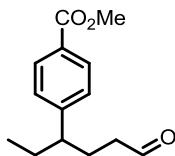

The general procedure for the preparation of **3a** was used with the following modifications. The ligated catalyst mixture contained 14 mg Pd<sub>2</sub>dba<sub>3</sub> (0.02 mmol, 0.03 equiv), and 10 mg ligand **1b** (0.04 mmol, 0.07 equiv). (*Z*)-Hex-3-en-1-ol (50 mg, 0.5 mmol) and the aryldiazonium hexafluorophosphate (339 mg 1.1 mmol, 2.2 equiv) derived

from methyl 4-aminobenzoate were used, in a total of 5 mL DMF. The reaction was stirred for 15 h. Following the aqueous workup described above and concentration, the product was purified by silica gel flash chromatography using 3% acetone in hexanes containing 0.1 % triethylamine to give an aldehyde product as a colorless oil in 63% yield (74 mg). The product was isolated along with regioisomeric products.  $[\alpha]_D^{20} = +13^\circ$  (c = 0.11, CHCl<sub>3</sub>).  $R_f = 0.40$  w/ 20% acetone in hexanes. <sup>1</sup>H-NMR (300 MHz, CDCl<sub>3</sub>)  $\delta = 9.65$  (t,  $J = 1.5$  Hz, 1 H), 7.96 (d,  $J = 8.7$  Hz, 2 H), 7.20 (d,  $J = 8.7$  Hz, 2 H), 3.89 (s, 3 H), 2.53–2.46 (m, 1 H), 2.29–2.22 (m, 2 H), 2.09–2.01 (m, 1 H), 1.88–1.54 (m, 3 H), 0.77 (t,  $J = 7.5$  Hz, 3 H). <sup>13</sup>C-NMR (75 MHz, CDCl<sub>3</sub>)  $\delta = 202.0, 167.0, 149.9, 129.8, 128.4, 127.7, 52.0, 47.1, 42.0, 29.5, 28.3, 12.0$ . IR (neat): 2957, 1716, 1609, 1435, 1275, 1111, 771, 708 cm<sup>-1</sup>. HRMS (M+H)<sup>+</sup> calcd. 235.1334, obsvd. 235.1339.

In order to determine the er of the product, the corresponding primary alcohol was prepared by the following protocol. This product, **4g** was dissolved in MeOH, (3 mL) in a 20 mL scintillation vial equipped with a stir bar. The mixture was cooled to 0 °C. Sodium borohydride (19 mg, 0.5 mmol, 1.5 equiv) was added, and the resulting mixture was stirred for 30 min. The solvent was removed under reduced pressure, and the resulting residue was transferred to a separatory funnel using diethyl ether (10 mL) and water (10 mL). The aqueous layer was extracted with diethyl ether (2 x 15 mL), and the combined organic layers were washed with water (2 x 10 mL), and brine (1 x 10 mL). The organic layer was then dried over sodium sulfate, and concentrated under reduced pressure. The resulting mixture was purified using silica gel flash chromatography using 7% acetone in hexanes to give the alcohol product, **4ga**. The product was isolated along with regioisomeric products.  $[\alpha]_D^{20} = +17^\circ$  (c = 0.089, CHCl<sub>3</sub>).  $R_f = 0.33$  w/ 20%

acetone in hexanes.  $^1\text{H-NMR}$  (300 MHz,  $\text{CDCl}_3$ )  $\delta = 7.95$  (d,  $J = 8.4$  Hz, 2 H),  $7.20$  (d,  $J = 8.4$  Hz, 2 H),  $3.88$  (s, 3 H),  $3.54$  (t,  $J = 6.6$  Hz, 2 H),  $2.54$ – $2.44$  (m, 1 H),  $1.83$ – $1.25$  (m, 6 H),  $0.75$  (t,  $J = 7.5$  Hz, 3 H).  $^{13}\text{C-NMR}$  (75 MHz,  $\text{CDCl}_3$ )  $\delta = 157.7$ ,  $137.4$ ,  $128.5$ ,  $113.6$ ,  $63.1$ ,  $55.2$ ,  $46.8$ ,  $32.7$ ,  $30.9$ ,  $29.9$ ,  $12.2$ . IR (neat):  $2931$ ,  $1718$ ,  $1609$ ,  $1435$ ,  $1275$ ,  $1111$ ,  $773$ ,  $707$   $\text{cm}^{-1}$ . HRMS ( $\text{M}+\text{H}$ ) $^+$  calcd.  $237.1491$ , obsvd.  $237.1490$ .

Table 2, entry 9 ((-)-4-(4-nitrophenyl)hexanal) (**4h**)

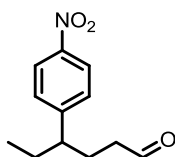

The general procedure for the preparation of **3a** was used with the following modifications. The ligated catalyst mixture contained 14 mg  $\text{Pd}_2\text{dba}_3$  (0.02 mmol, 0.03 equiv), and 10 mg ligand **1b** (0.04 mmol, 0.07 equiv). (*Z*)-Hex-3-en-1-ol (50 mg, 0.5 mmol) and the aryldiazonium hexafluorophosphate (325 mg 1.1 mmol, 2.2 equiv) derived from methyl 4-nitroaniline were used, in a total of 5 mL DMF. The reaction was stirred for 15 h. Following the aqueous workup described above and concentration, the product was purified by silica gel flash chromatography using 3% acetone in hexanes containing 0.1 % triethylamine to give an aldehyde product as a colorless oil in 61% yield (67 mg).  $[\alpha]_D^{20} = -16^\circ$  ( $c = 0.110$ ,  $\text{CHCl}_3$ ).  $R_f = 0.37$  w/ 20% acetone in hexanes.  $^1\text{H-NMR}$  (300 MHz,  $\text{CDCl}_3$ )  $\delta = 9.68$  (t,  $J = 1.5$  Hz, 1 H),  $8.16$  (d,  $J = 8.7$  Hz, 2 H),  $7.30$  (d,  $J = 8.7$  Hz, 2 H),  $3.79$  (s, 3 H),  $2.66$ – $2.52$  (m, 1 H),  $2.32$ – $2.26$  (m, 2 H),  $2.10$ – $2.06$  (m, 1 H),  $1.86$ – $1.60$  (m, 3 H),  $0.78$  (t,  $J = 7.5$  Hz, 3 H).  $^{13}\text{C-NMR}$  (75 MHz,  $\text{CDCl}_3$ )  $\delta = 201.6$ ,  $152.4$ ,  $146.7$ ,  $128.5$ ,  $123.8$ ,  $47.0$ ,  $41.8$ ,  $29.4$ ,  $28.1$ ,  $11.9$ . IR (neat):  $2961$ ,  $1720$ ,  $1596$ ,  $1515$ ,  $1343$ ,  $1110$ ,  $853$ ,  $701$   $\text{cm}^{-1}$ . HRMS ( $\text{M}+\text{H}$ ) calcd.  $222.1130$ , obsvd.  $222.1133$ .

In order to determine the er of the product, the corresponding primary alcohol was prepared by the following protocol. This product, **4h** was dissolved in MeOH, (3 mL) in a 20 mL scintillation vial equipped with a stir bar. The mixture was cooled to 0 °C. Sodium borohydride (19 mg, 0.5 mmol, 1.5 equiv) was added, and the resulting mixture was stirred for 30 min. The solvent was removed under reduced pressure, and the resulting residue was transferred to a separatory funnel using diethyl ether (10 mL) and water (10 mL). The aqueous layer was extracted with diethyl ether (2 x 15 mL), and the combined organic layers were washed with water (2 x 10 mL), and brine (1 x 10 mL). The organic layer was then dried over sodium sulfate, and concentrated under reduced pressure. The resulting mixture was purified using silica gel flash chromatography using 7% acetone in hexanes to give the alcohol product, **4ha**.  $[\alpha]_D^{20} = -12^\circ$  (c = 0.110, CHCl<sub>3</sub>).  $R_f = 0.30$  w/ 20% acetone in hexanes. <sup>1</sup>H-NMR (300 MHz, CDCl<sub>3</sub>) 8.12 (d,  $J = 8.7$  Hz, 2 H), 7.28 (d,  $J = 8.7$  Hz, 2 H), 3.55 (t,  $J = 6.3$  Hz, 2 H), 2.59–2.50 (m, 1 H), 1.84–1.22 (m, 6 H), 0.74 (t,  $J = 7.5$  Hz, 3 H). <sup>13</sup>C-NMR (75 MHz, CDCl<sub>3</sub>)  $\delta = 153.7, 146.4, 128.5, 123.6, 62.7, 47.7, 32.3, 30.6, 29.5, 12.0$ . IR (neat): 2931, 1596, 1514, 1342, 851, 700 cm<sup>-1</sup>. HRMS (M+H)<sup>+</sup> calcd. 224.1287, obsvd. 224.1288.

Figure 3 ((+)-methyl 4-(6-oxoheptan-2-yl)benzoate) (**5a**)

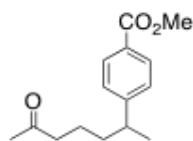

The general procedure for the preparation of **3a** was used with the following modifications. The ligated catalyst mixture contained 14 mg Pd<sub>2</sub>dba<sub>3</sub> (0.02 mmol, 0.03 equiv), and 10 mg ligand **1b** (0.04 mmol, 0.07 equiv). (*E*)-Hept-5-en-2-ol (57 mg, 0.5

mmol) and the aryldiazonium hexafluorophosphate (350 mg, 1.1 mmol, 2.2 equiv) derived from methyl 4-aminobenzoate were used, in a total of 5 mL DMF. The reaction was stirred for 15 h. Following the aqueous workup described above and concentration, the product was purified by silica gel flash chromatography using 3% acetone in hexanes to give **5a** as a colorless oil in 48-54% yield (60 mg and 67 mg).  $[\alpha]_D^{20} = +8^\circ$  ( $c = 0.230$ ,  $\text{CHCl}_3$ ).  $R_f = 0.39$  w/ 10% acetone in hexanes.  $^1\text{H-NMR}$  (300 MHz,  $\text{CDCl}_3$ )  $\delta$  7.96 (d,  $J = 8.4$  Hz, 2 H), 7.24 (d,  $J = 8.2$  Hz, 2 H), 3.90 (s, 3 H), 2.75 (sextet,  $J = 7.0$  Hz, 1 H), 2.38 (t,  $J = 6.9$  Hz, 2 H), 2.08 (s, 3 H), 1.61-1.35 (m, 4 H), 1.24 (d,  $J = 6.9$  Hz, 3H).  $^{13}\text{C-NMR}$  (75 MHz,  $\text{CDCl}_3$ )  $\delta = 209.1, 153.0, 130.0, 130.0, 128.2, 127.2, 52.2, 43.8, 40.2, 37.7, 30.1, 22.2, 22.1$ . IR (neat): 2953, 1713, 1609, 1435, 1275, 1111, 1019, 857, 775, 708  $\text{cm}^{-1}$ . HRMS  $\text{C}_{15}\text{H}_{20}\text{O}_3$  ( $\text{M}+\text{Na}$ ) $^+$  calcd. 271.1310, obsvd. 271.1315.

Figure 3 ((+)-methyl 4-(6-hydroxyhexan-2-yl)benzoate derived from corresponding aldehyde, **5b**)

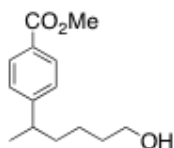

The general procedure for the preparation of **3a** was used with the following modifications. The ligated catalyst mixture contained 14 mg  $\text{Pd}_2\text{dba}_3$  (0.02 mmol, 0.03 equiv), and 10 mg ligand **1b** (0.04 mmol, 0.07 equiv). (*E*)-Hex-4-en-1-ol (50 mg, 0.5 mmol) and the aryldiazonium hexafluorophosphate (350 mg 1.1 mmol, 2.2 equiv) derived from methyl 4-aminobenzoate were used, in a total of 5 mL DMA. The reaction was stirred for 15 h. Following the aqueous workup described above and concentration, the product was purified by silica gel flash chromatography using 3% acetone in hexanes

containing 0.1 % triethylamine to give an aldehyde product as a colorless oil in 56-61% yield (65 mg and 71 mg). This product was dissolved in MeOH, (3 mL) in a 20 mL scintillation vial equipped with a stir bar. The mixture was cooled to 0 °C. Sodium borohydride (17 mg, 0.43 mmol, 1.5 equiv) was added, and the resulting mixture was stirred for 30 min. The solvent was removed under reduced pressure, and the resulting residue was transferred to a separatory funnel using diethyl ether (10 mL) and water (10 mL). The aqueous layer was extracted with diethyl ether (2 x 15 mL), and the combined organic layers were washed with water (2 x 10 mL), and brine (1 x 10 mL). The organic layer was then dried over sodium sulfate, and concentrated under reduced pressure. The resulting mixture was purified using silica gel flash chromatography using 7% acetone in hexanes to give the alcohol product. The product was isolated along with regioisomeric products.  $[\alpha]_D^{20} = +10^\circ$  (c = 0.105, CHCl<sub>3</sub>). R<sub>f</sub> = 0.33 w/ 20% acetone in hexanes. <sup>1</sup>H-NMR (300 MHz, CDCl<sub>3</sub>) (major product) δ 7.96 (d, *J* = 8.2 Hz, 2 H), 7.21 (d, *J* = 8.7 Hz, 2 h), 3.90 (s, 3 H), 3.63-3.51 (m, 2 H), 2.75 (sextet, *J* = 7.2 Hz, 1 H), 1.83-1.17 (m, 9 H). <sup>13</sup>C-NMR (75 MHz, CDCl<sub>3</sub>) (all resonances) δ = 167.4, 153.3, 151.4, 129.9, 129.9, 128.1, 128.0, 127.2, 63.1, 63.0, 52.2, 48.0, 40.3, 38.1, 32.9, 32.6, 31.0, 30.0, 24.0, 22.3, 12.3. IR (neat): 3446, 2933, 2873, 1718, 1700, 1559, 1457, 1114, 668 cm<sup>-1</sup>. HRMS C<sub>14</sub>H<sub>20</sub>O<sub>3</sub> (M+Na)<sup>+</sup> calcd. 259.1310, obsvd. 259.1310.

### **Preparation of racemic products in Tables 1 and 2 and Figure 3**

The procedure for the preparation of each product in Tables 1 and 2 and Figure 3 was used with the modification that the ligand was omitted from the reaction mixture. The reactions were performed in otherwise identical fashion as the enantiomerically enriched products. The products were worked up and purified in the same fashion as described for the enantiomerically enriched products.

## Determination of enantiomeric ratio

**Table S3.** Products shown in Table 1

| entry | compound                                                                                      | conditions                                        | retention time    | er   |
|-------|-----------------------------------------------------------------------------------------------|---------------------------------------------------|-------------------|------|
| 1     | 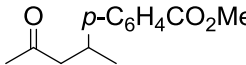 <b>3a</b>   | SFC, AD-Y column<br>2% MeOH, 2 mL/min             | 7.9 and 9.8 min   | 95:5 |
| 2     |  <b>3b</b>   | SFC, AD-H column<br>5-50% MeOH, 2 mL/min          | 3.5 and 3.9 min   | 91:9 |
| 3     |  <b>3c</b>   | SFC, AD-H column<br>5-50% MeOH, 2 mL/min          | 3.9 and 5.5 min   | 97:3 |
| 4     |  <b>3d</b>   | SFC, AD-H column<br>5-50% MeOH, 2 mL/min          | 5.0 and 6.3 min   | 96:4 |
| 5     |  <b>3e</b>   | SFC, AD-H column<br>5-50% MeOH, 2 mL/min          | 4.9 and 6.0 min   | 97:3 |
| 6     |  <b>3f</b>   | SFC, AD-H column<br>5-50% MeOH, 2 mL/min          | 3.6 and 4.9 min   | 96:4 |
| 7     |  <b>3g</b>   | SFC, AD-H column<br>5-50% <i>i</i> PrOH, 2 mL/min | 6.5 and 6.8 min   | 94:6 |
| 8     |  <b>3h</b>  | SFC, AD-H column<br>5-50% <i>i</i> PrOH, 2 mL/min | 4.0 and 4.5 min   | 95:5 |
| 9     |  <b>3i</b> | SFC, AD-Y column<br>2% MeOH, 2 mL/min             | 7.9 and 10.5 min  | 95:5 |
| 10*   |  <b>3d</b> | SFC, AD-H column<br>5-50% MeOH, 2 mL/min          | 4.8 and 6.1 min   | 4:96 |
| 11*   |  <b>3i</b> | SFC, AD-Y column<br>2% MeOH, 2 mL/min             | 7.5 and 9.6 min   | 3:97 |
| 12*   |  <b>3j</b> | SFC, AD-H column<br>5-15% <i>i</i> PrOH, 1 mL/min | 14.3 and 14.7 min | 3:97 |
| 13*   |  <b>3k</b> | SFC, AD-H column<br>5-50% MeOH, 2 mL/min          | 5.6 and 7.6 min   | 3:97 |
| 14*   |  <b>3l</b> | SFC, AD-H column<br>5-50% MeOH, 2 mL/min          | 3.5 and 3.8 min   | 4:96 |
| 15*   |  <b>3m</b> | SFC, AD-H column<br>5-50% <i>i</i> PrOH, 2 mL/min | 4.2 and 4.4 min   | 7:93 |

All compounds are products of the asymmetric Heck reaction using (*E*)-allylic alcohol starting materials unless otherwise noted. \*Compounds are the products of the asymmetric Heck reaction using (*Z*)-allylic alcohol starting materials.



**Table S4.** Products shown in Table 2

| entry | compound                                                                            | conditions                                                  | retention time    | er       |
|-------|-------------------------------------------------------------------------------------|-------------------------------------------------------------|-------------------|----------|
| 1*    | 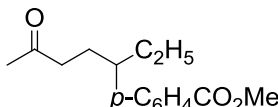   | <b>4a</b> SFC, AD-H column<br>5-15% <i>i</i> PrOH, 1 mL/min | 13.2 and 14.9 min | 96:4     |
| 2     |    | <b>4a</b> SFC, AD-H column<br>5-15% <i>i</i> PrOH, 1 mL/min | 13.5 and 14.9 min | 10:90    |
| 3*    |    | <b>4b</b> SFC, AD-H column<br>1-50% MeOH, 2 mL/min          | 22.8 and 27.9 min | 97:3     |
| 4     |    | <b>4c</b> SFC, AD-H column<br>5-50% <i>i</i> PrOH, 2 mL/min | 5.3 and 5.4 min   | 6:94     |
| 5†    |    | <b>4d</b> SFC, AS-H column<br>5-15% <i>i</i> PrOH, 1 mL/min | 14.0 and 14.6 min | 3:97     |
| 6†    |   | <b>4e</b> SFC, AD-H column<br>5-15% MeOH, 2 mL/min          | 5.4 and 5.6 min   | 2:98     |
| 7†    |  | <b>4f</b> SFC, AD-H column<br>5-15% MeOH, 2 mL/min          | 8.4 and 9.8 min   | 1:99     |
| 8†    |  | <b>4g</b> SFC, AD-H column<br>5-15% MeOH, 2 mL/min          | 7.6 and 8.2 min   | 2:98     |
| 9†    |  | <b>4h</b> SFC, AD-H column<br>5-15% MeOH, 2 mL/min          | 7.5 and 8.2 min   | 2.5:97.5 |

All compounds are products of the asymmetric Heck reaction using (*E*)-allylic alcohol starting materials unless otherwise noted. \*Compounds are the products of the asymmetric Heck reaction using (*Z*)-allylic alcohol starting materials. †All compounds are alcohol derivatives of aldehydes synthesized using the asymmetric Heck reaction using (*Z*)-allylic alcohol starting materials

**Table S5.** Product shown in Figure 3

| entry | compound                                                                            | conditions                                                  | retention time  | er   |
|-------|-------------------------------------------------------------------------------------|-------------------------------------------------------------|-----------------|------|
| 1     | 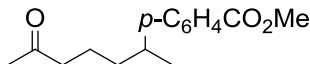 | <b>5a</b> SFC, AD-H<br>5-50% <i>i</i> PrOH, 2 mL/min        | 4.0 and 4.2 min | 96:4 |
| 2     |  | <b>5b</b> SFC, AD-H column<br>5-50% <i>i</i> PrOH, 2 mL/min | 5.9 and 6.1 min | 94:6 |

# Chiral Separations

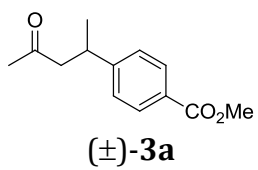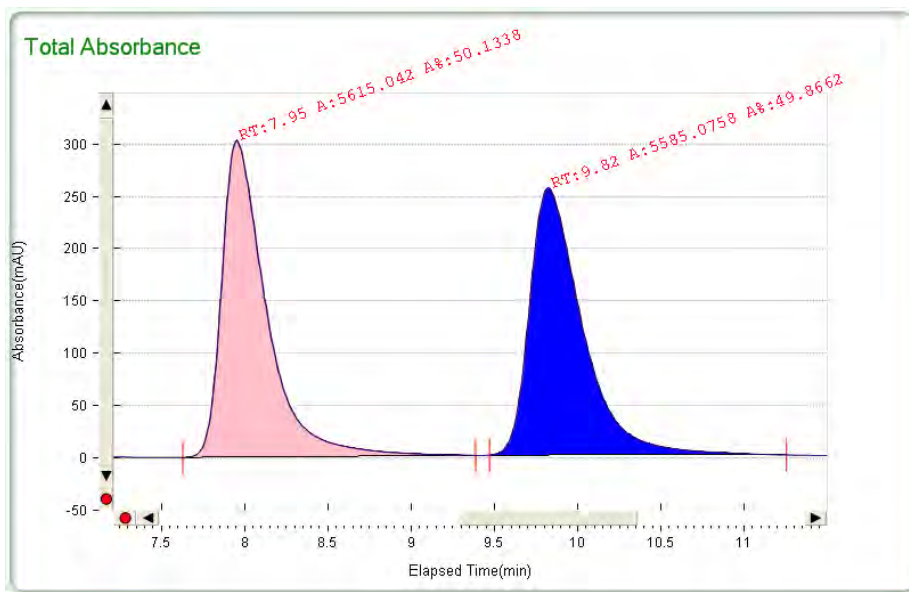

(+)-**3a**

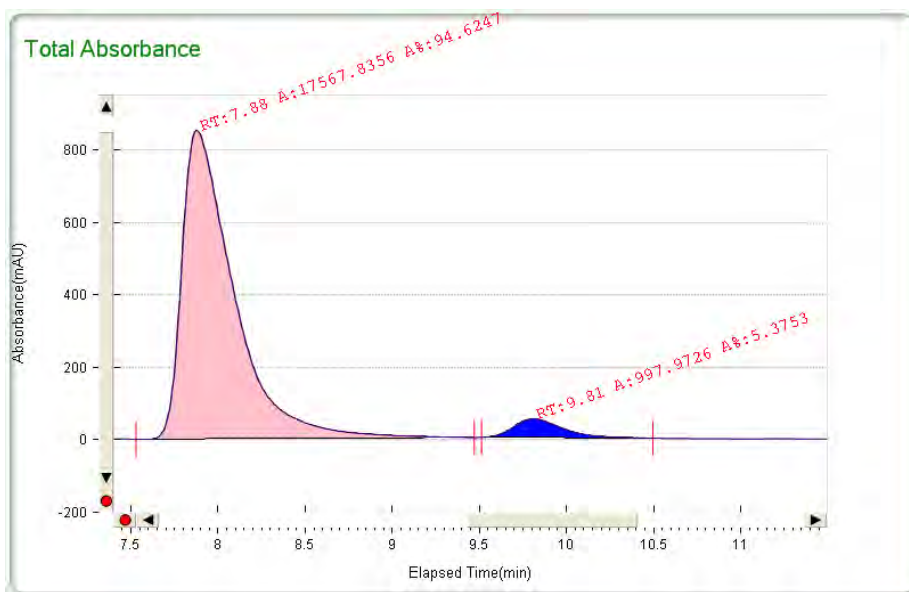

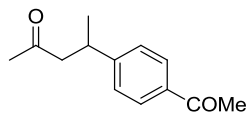

(±)-3b

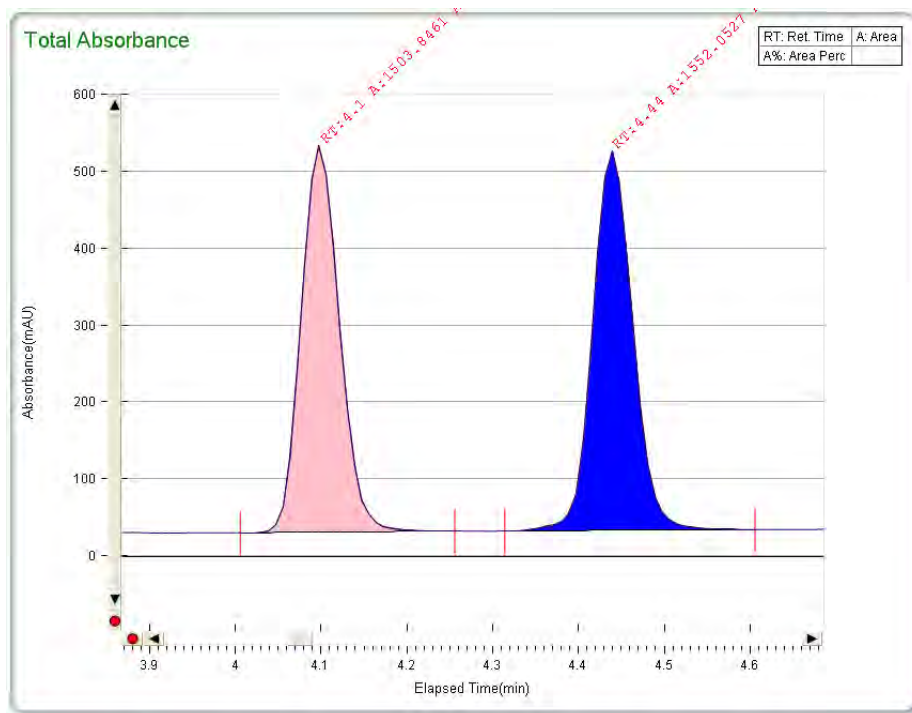

(+)-3b

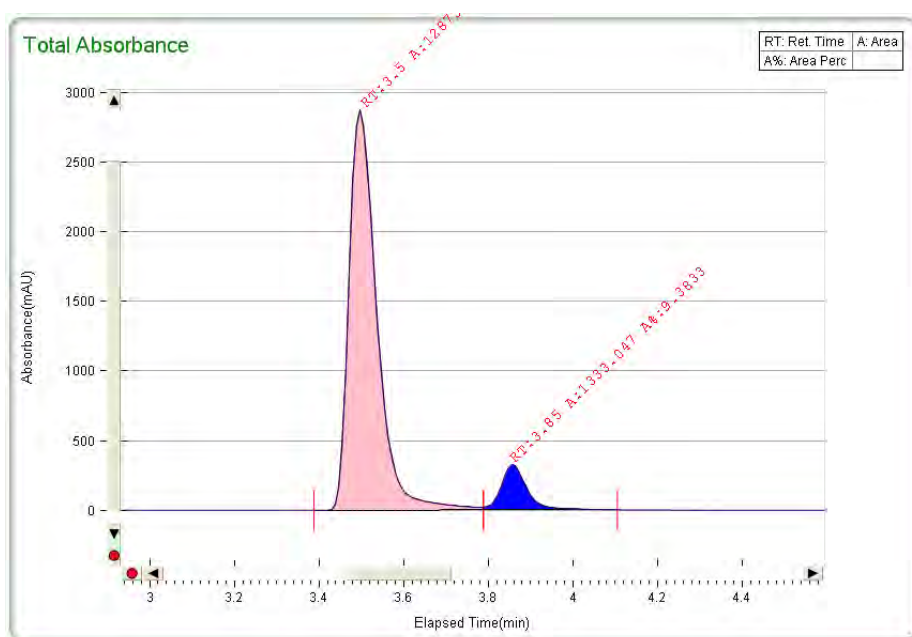

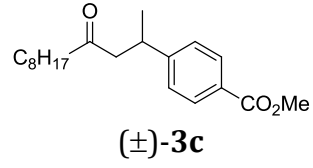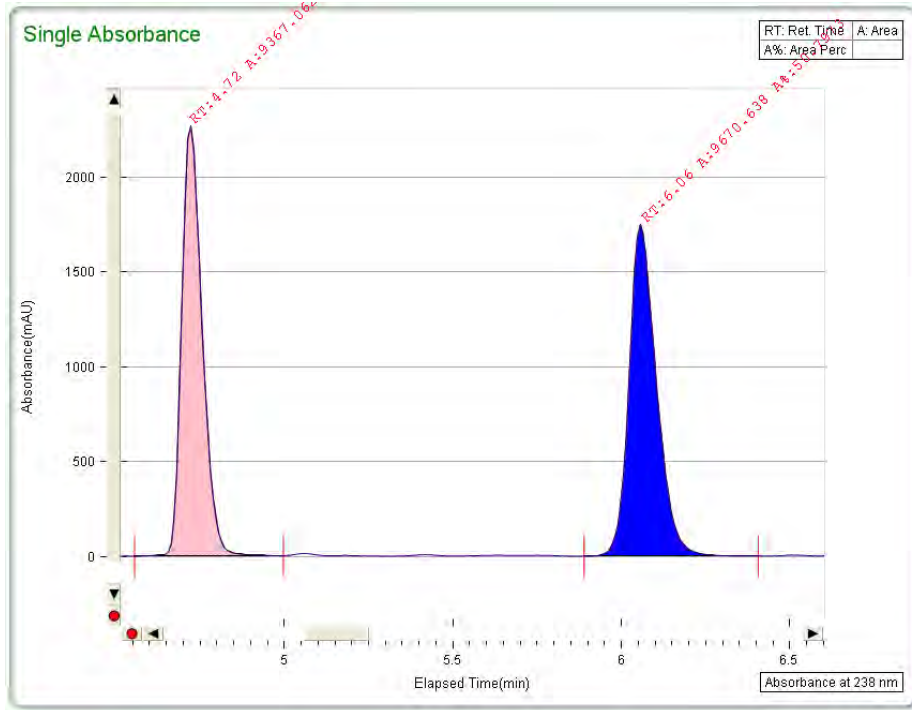

(+)-3c

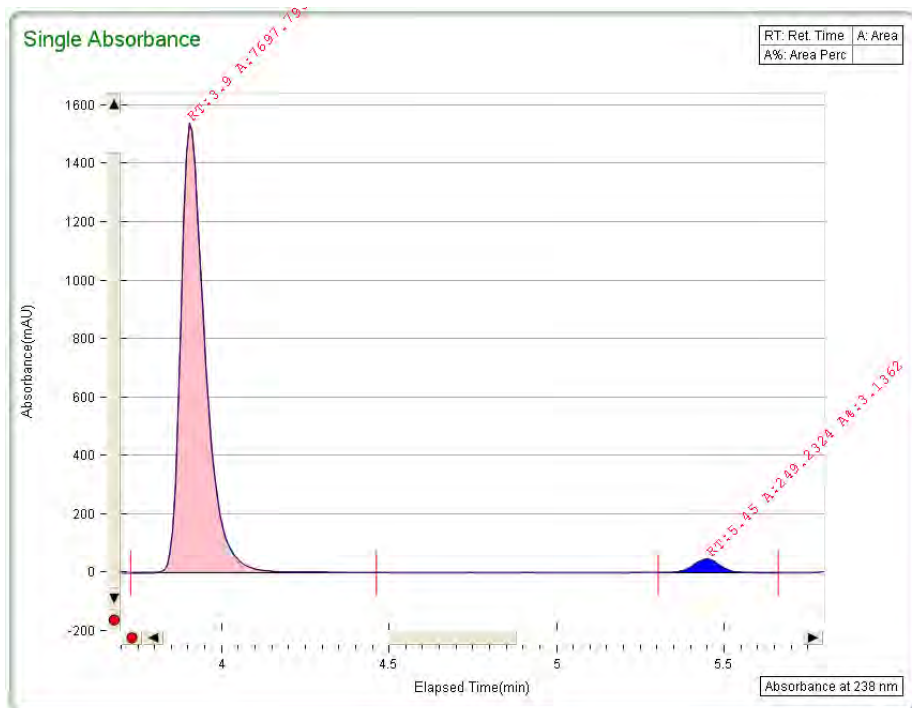

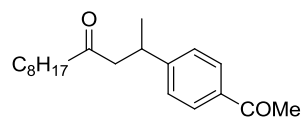

(±)-3d

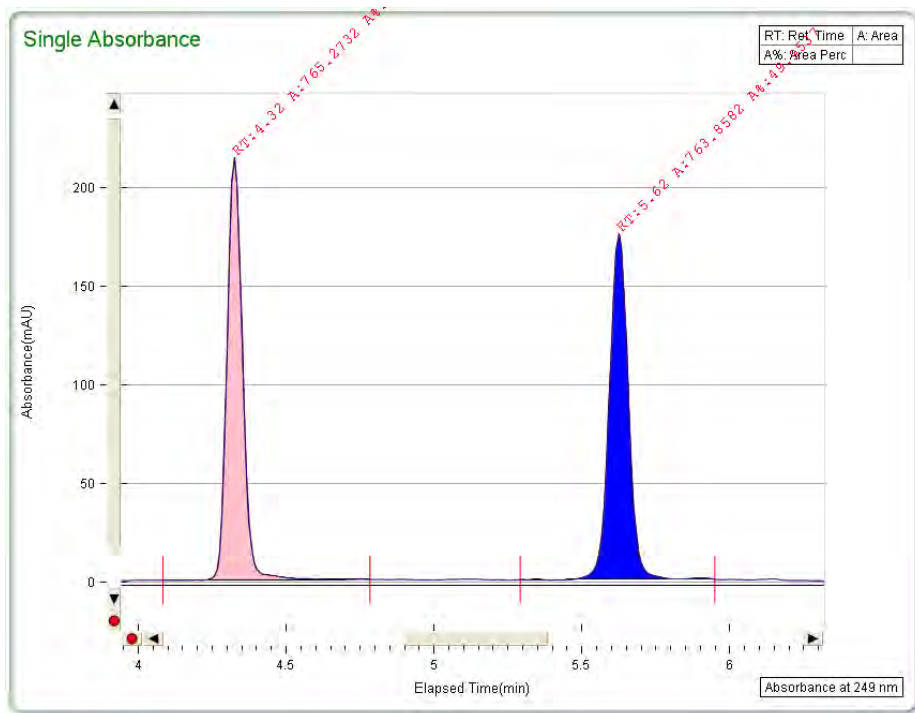

(+)-3d

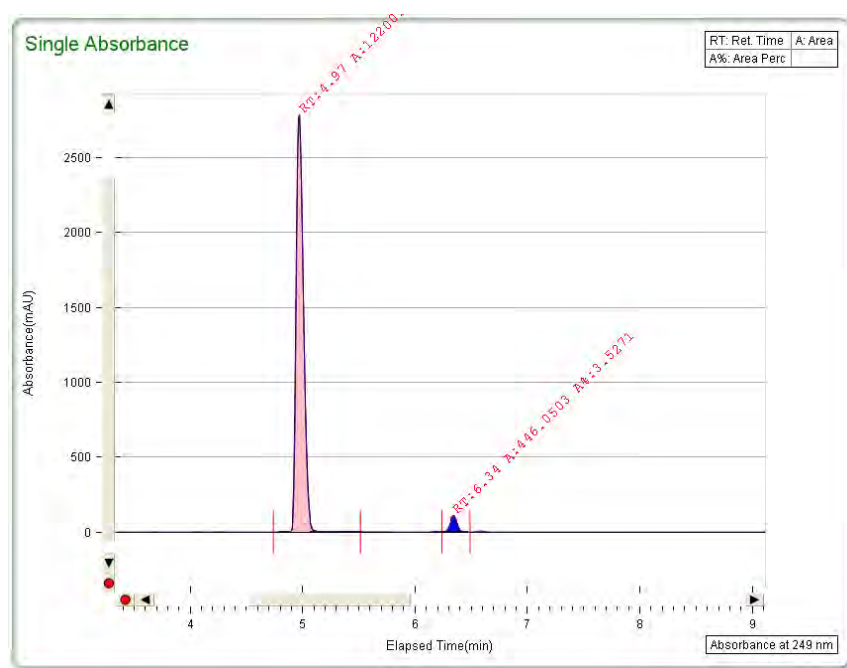

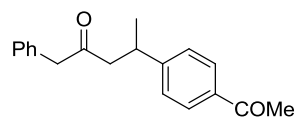

(±)-3e

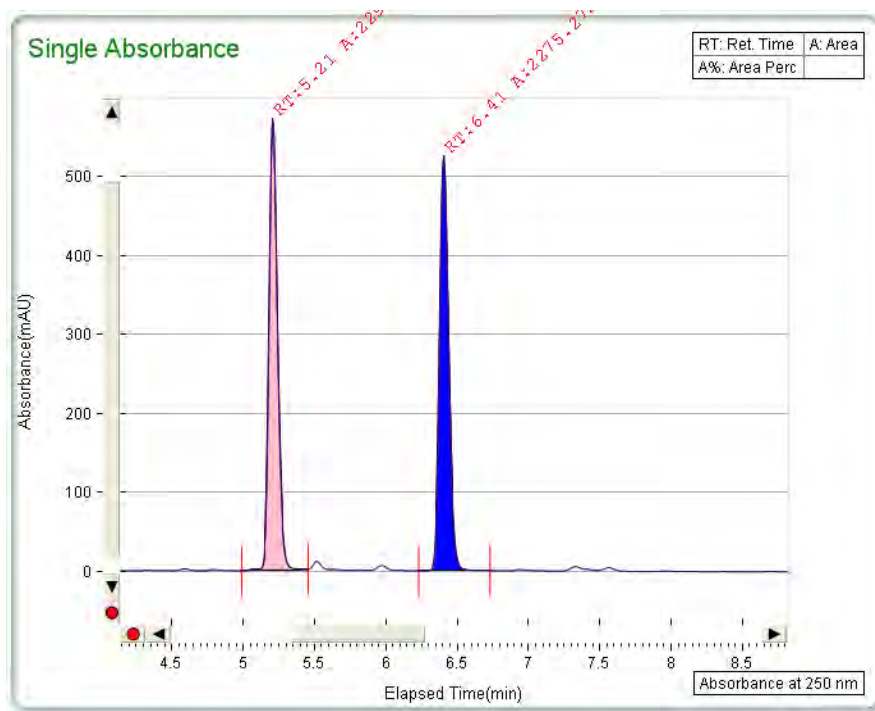

(+)-3e

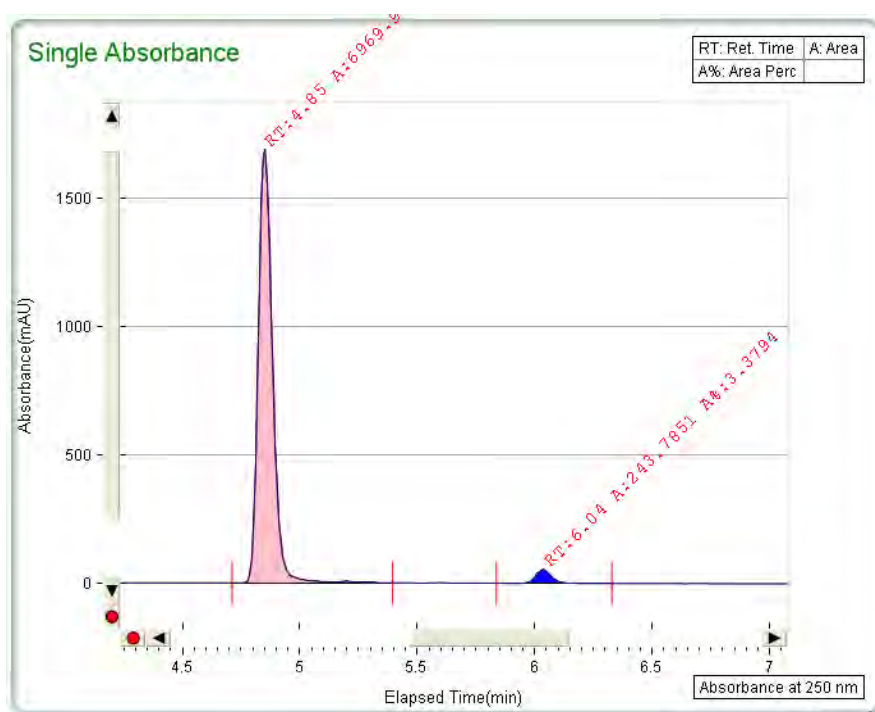

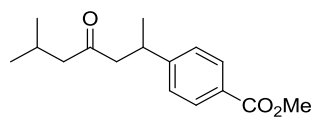

(±)-3f

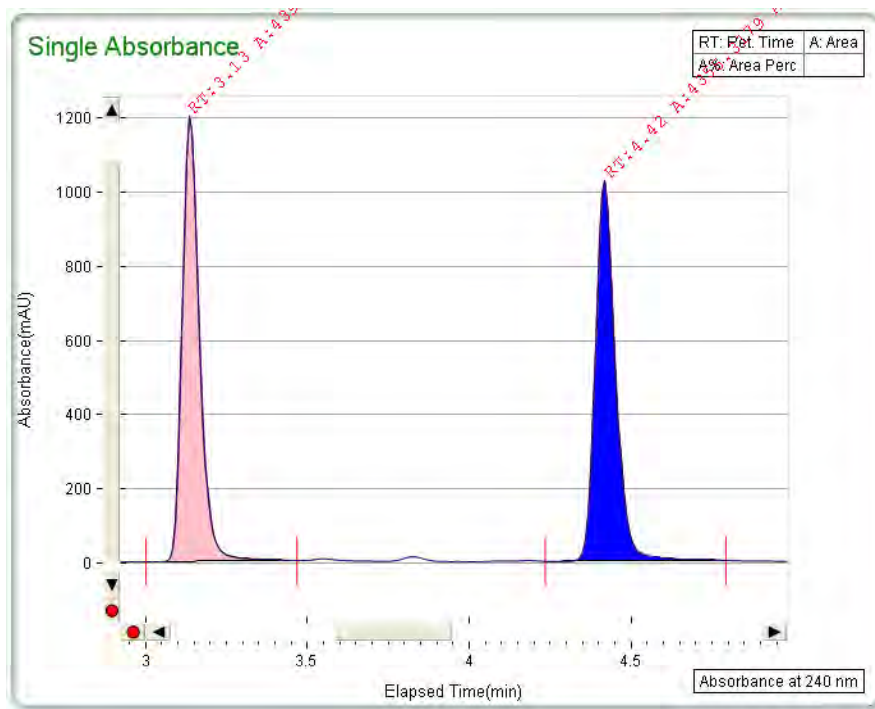

(+)-3f

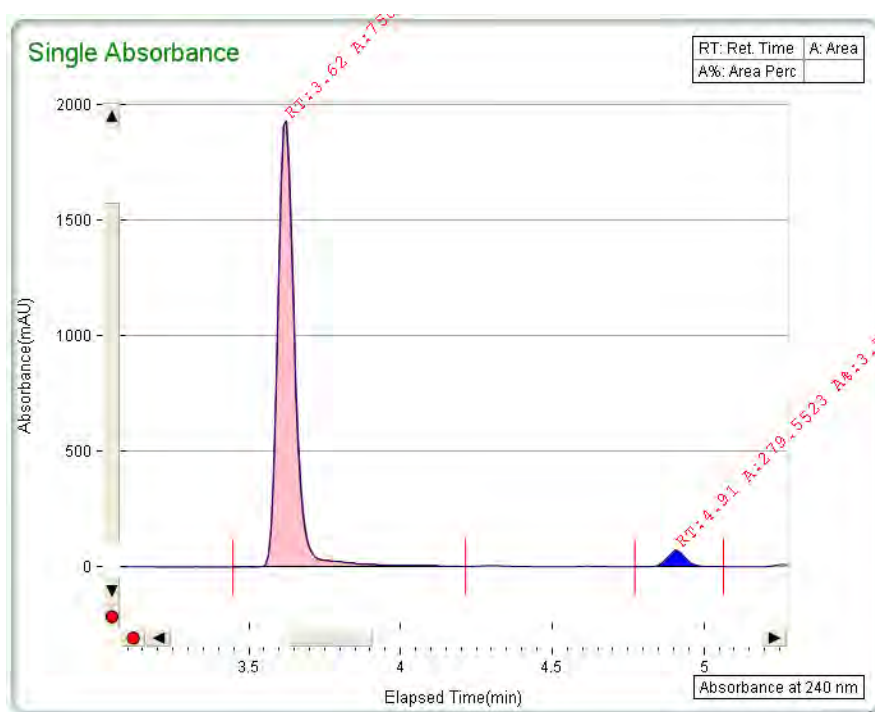

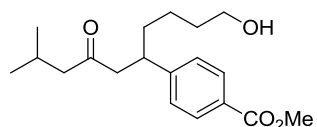

(±)-3g

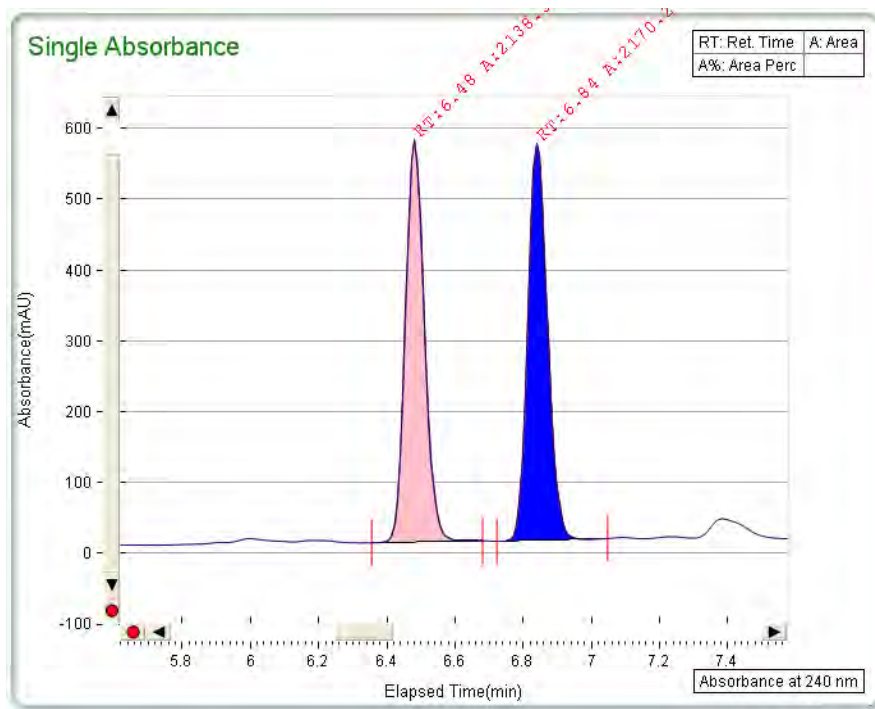

(+)-3g

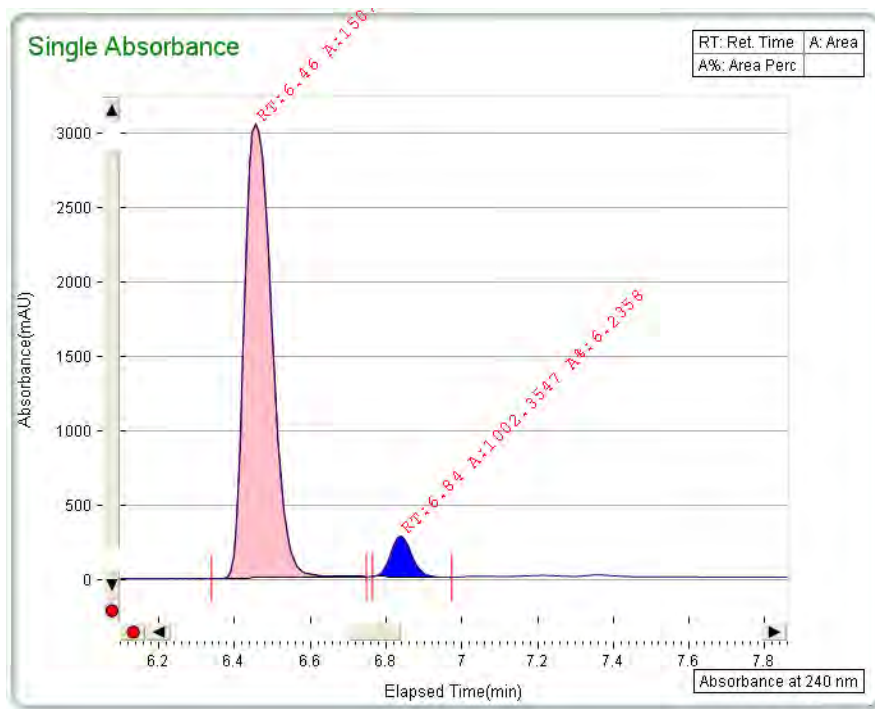



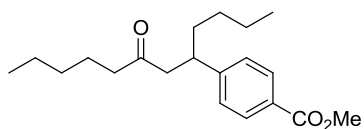

(±)-3h

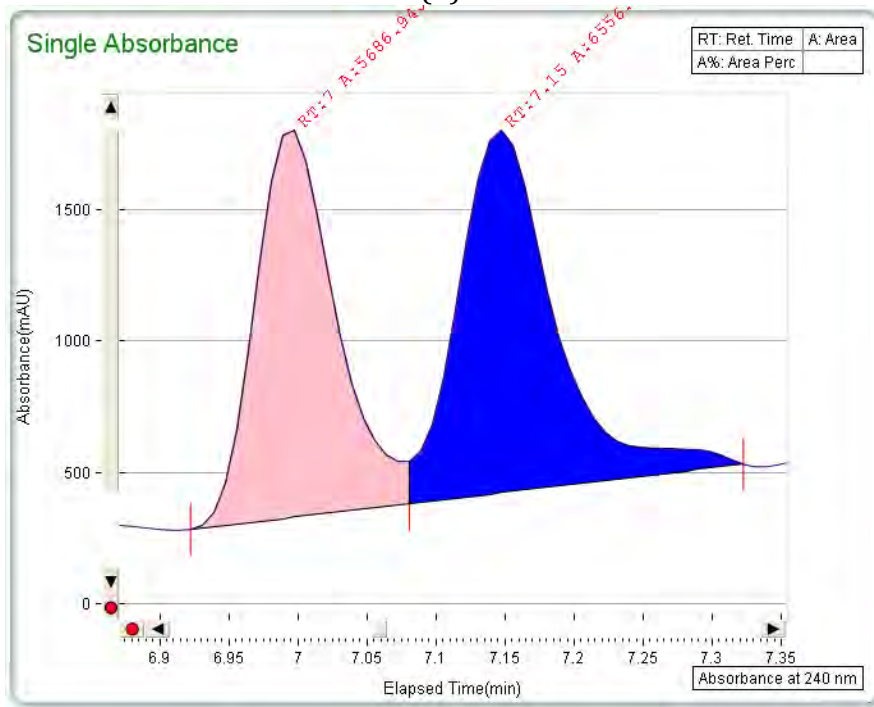

(+)-3h

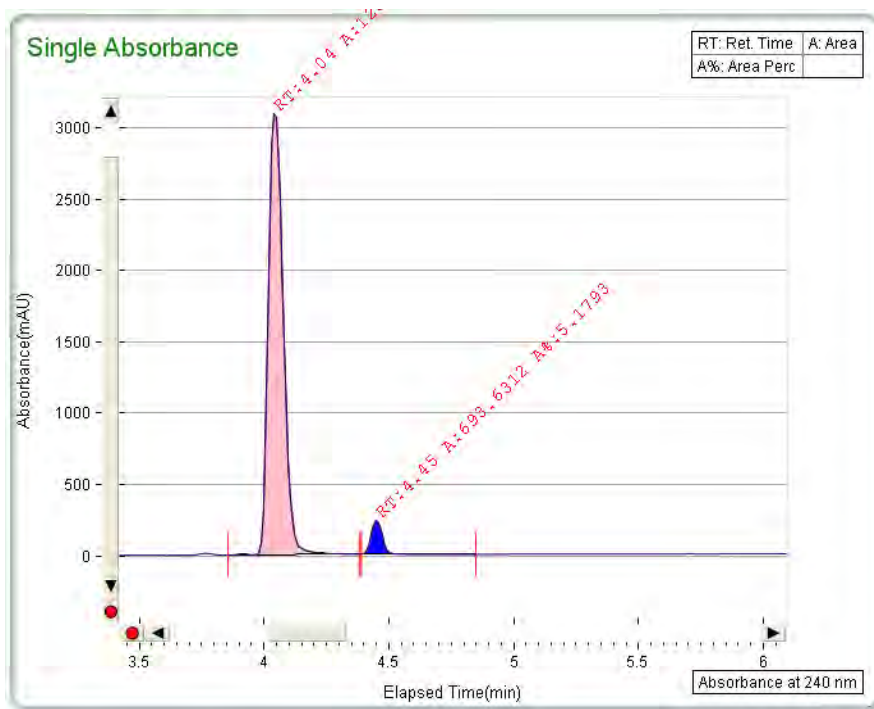

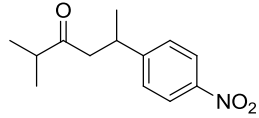

(±)-3i

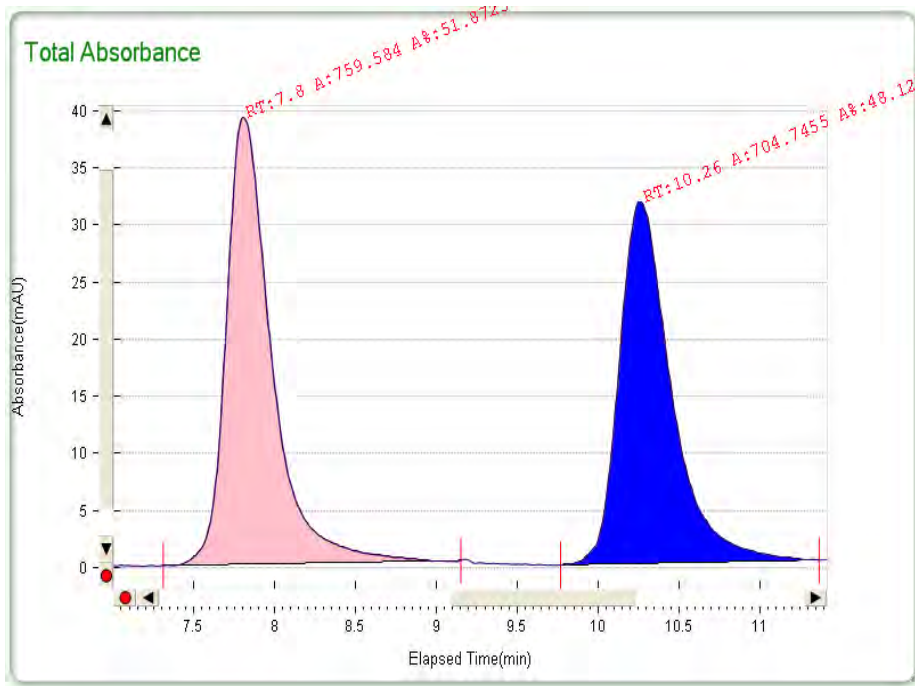

(+)-3i

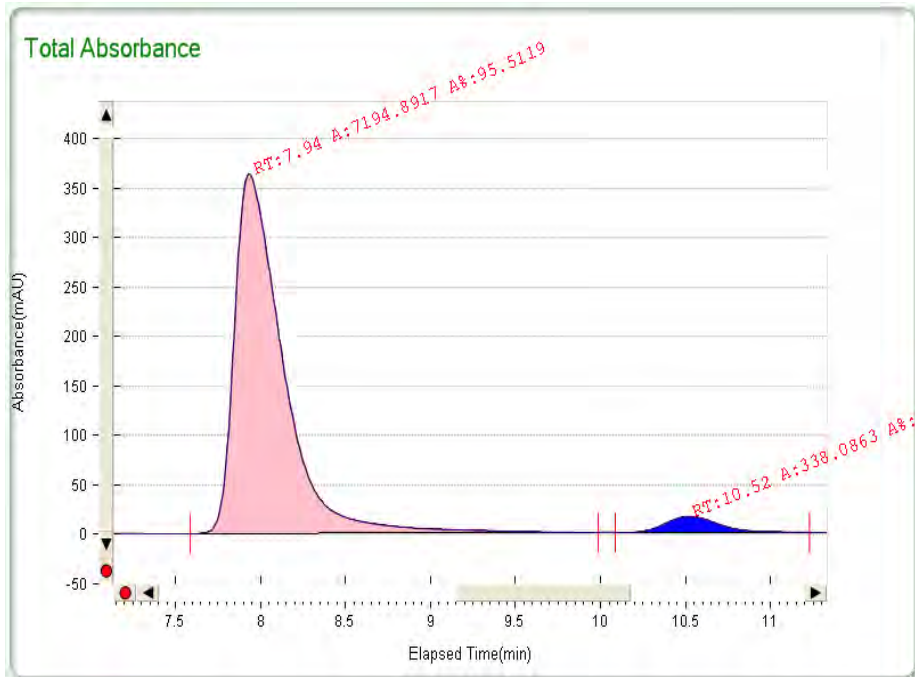

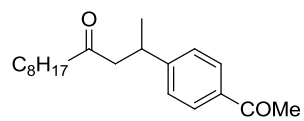

(±)-3d

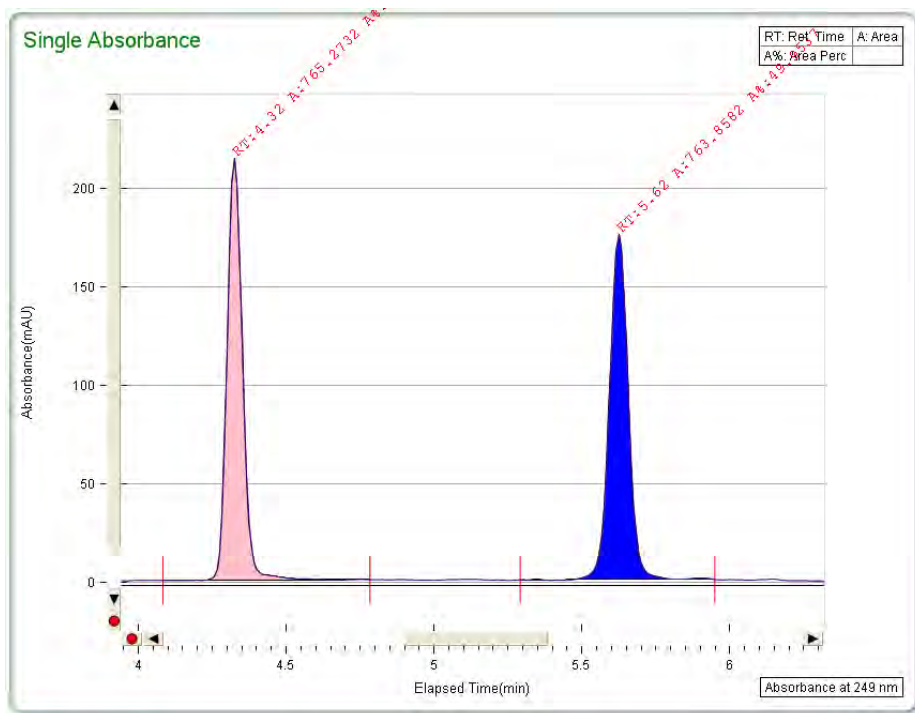

(-)-3d

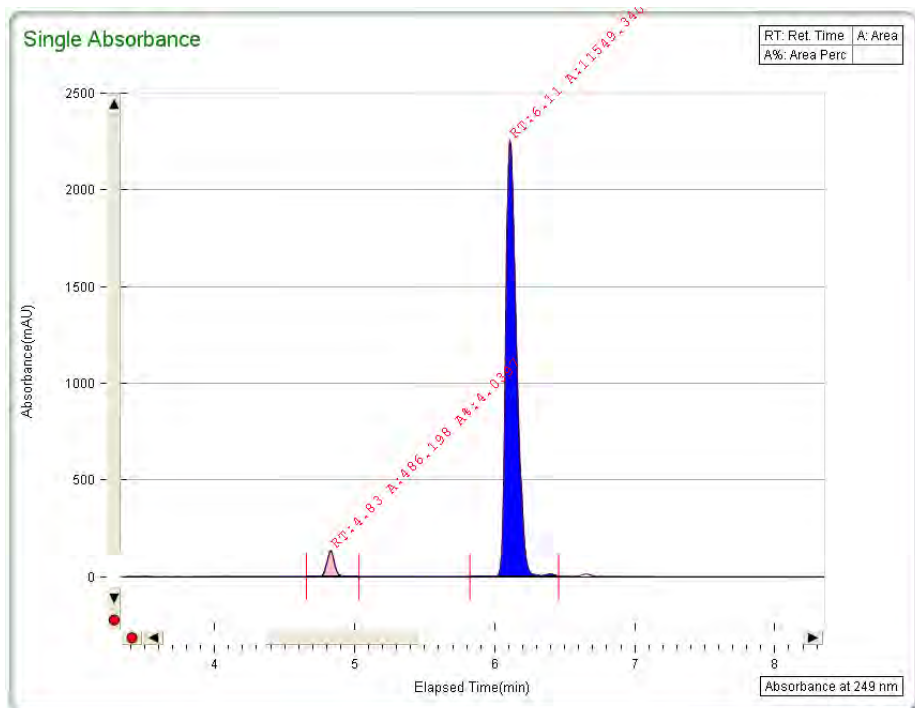

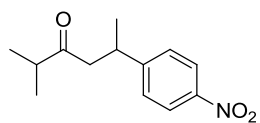

(±)-3i

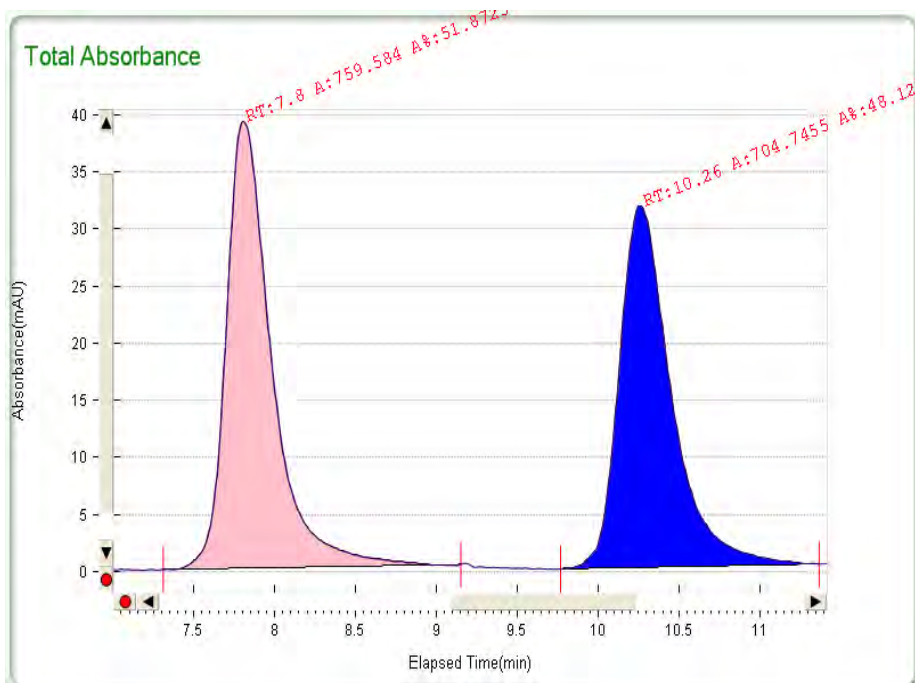

(-)-3i

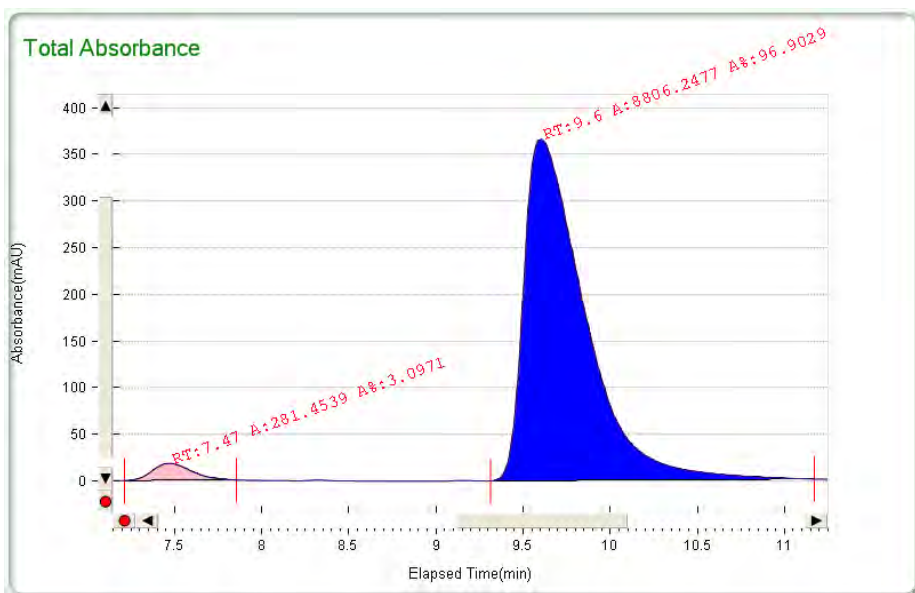

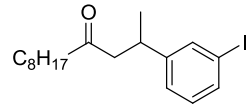

(±)-3j

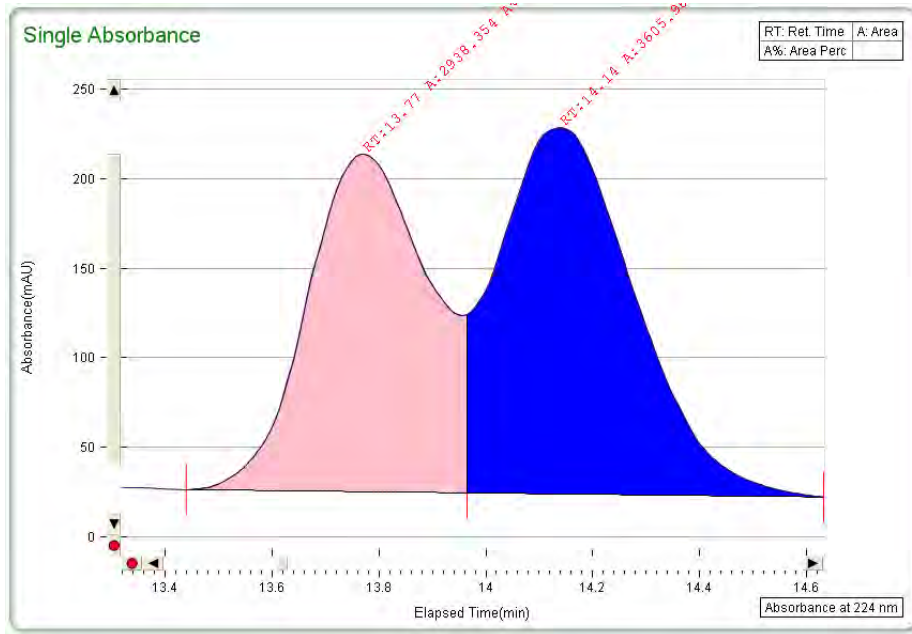

(-)-3j

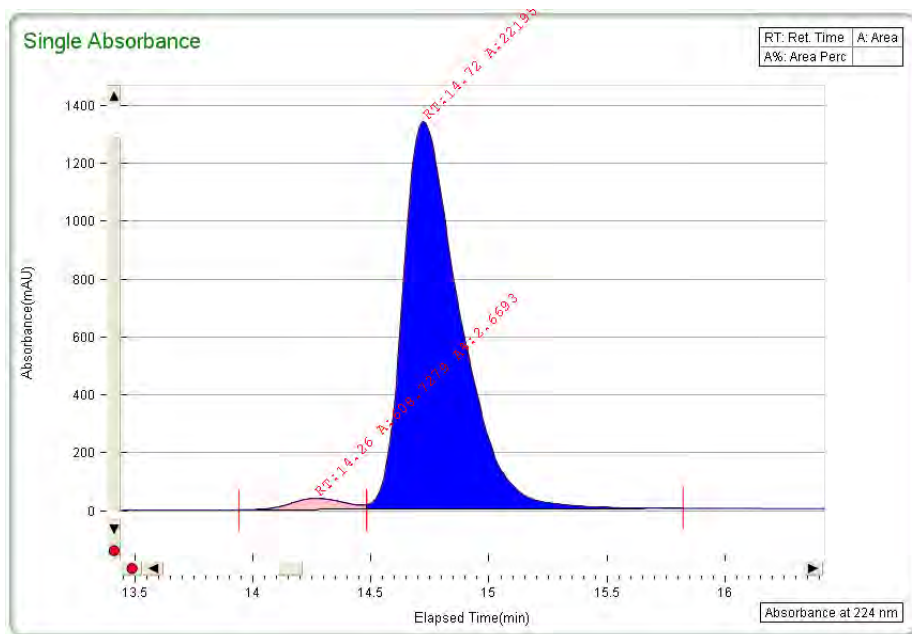

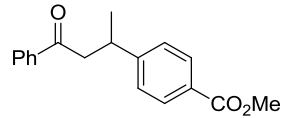

(±)-3k

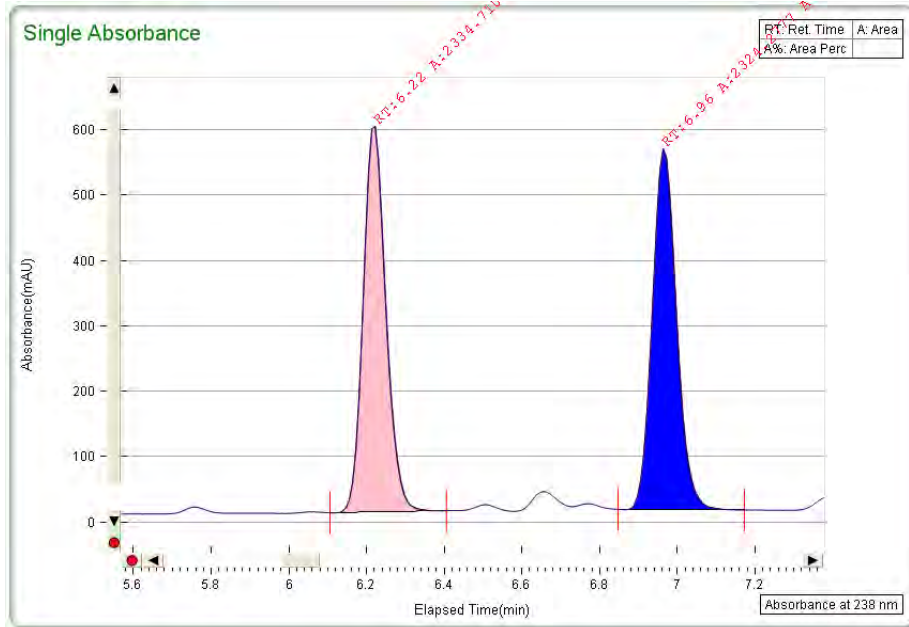

(+)-3k

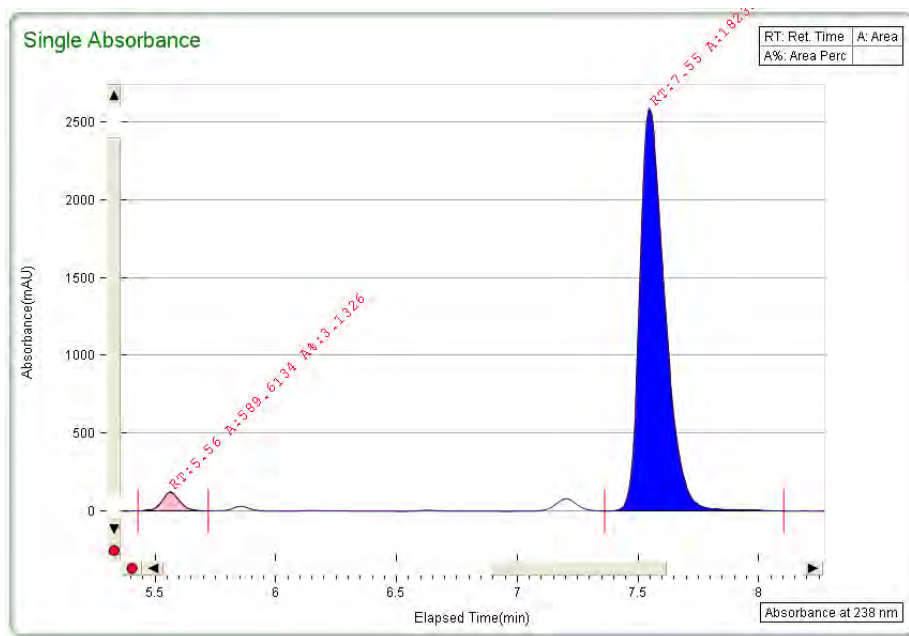

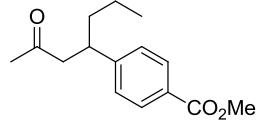

(±)-31

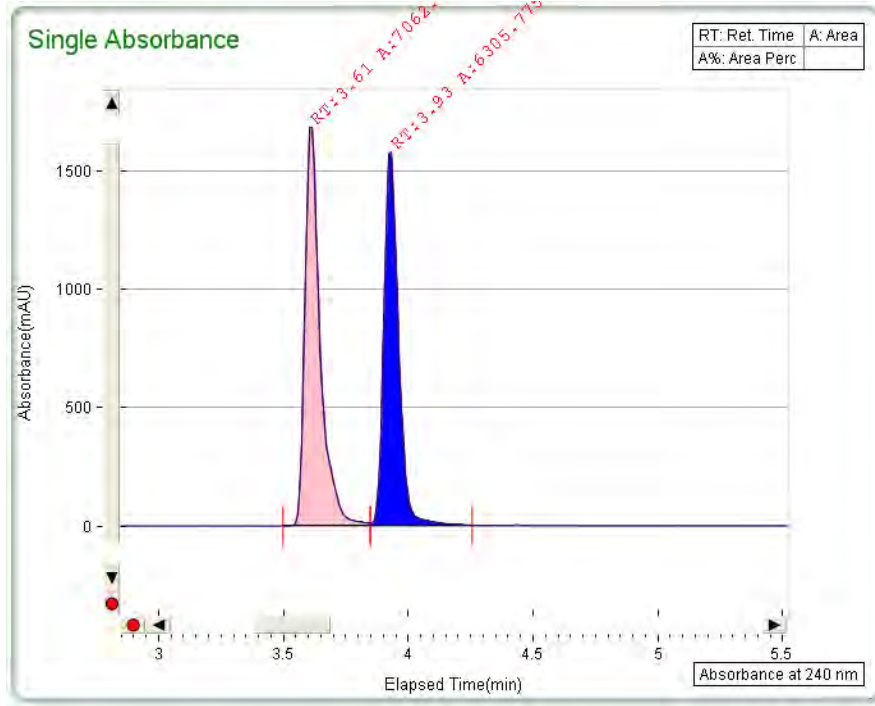

(+)-31

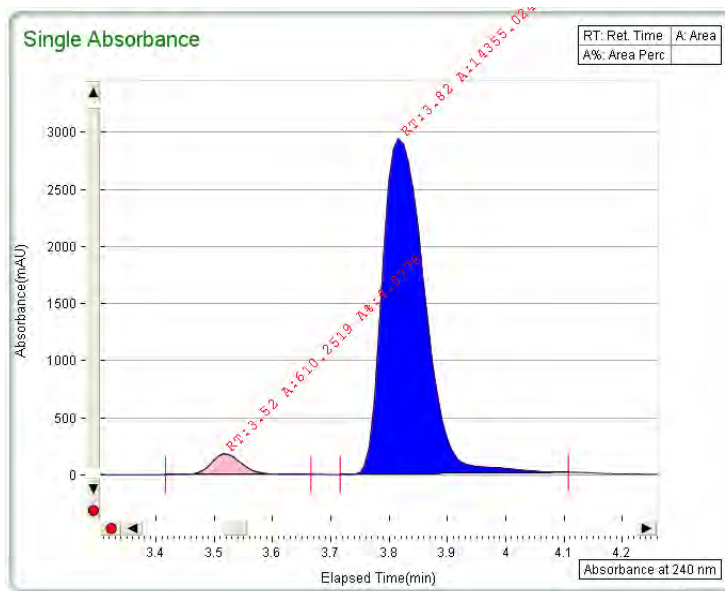

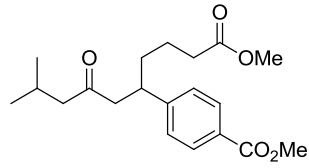

(±)-3m

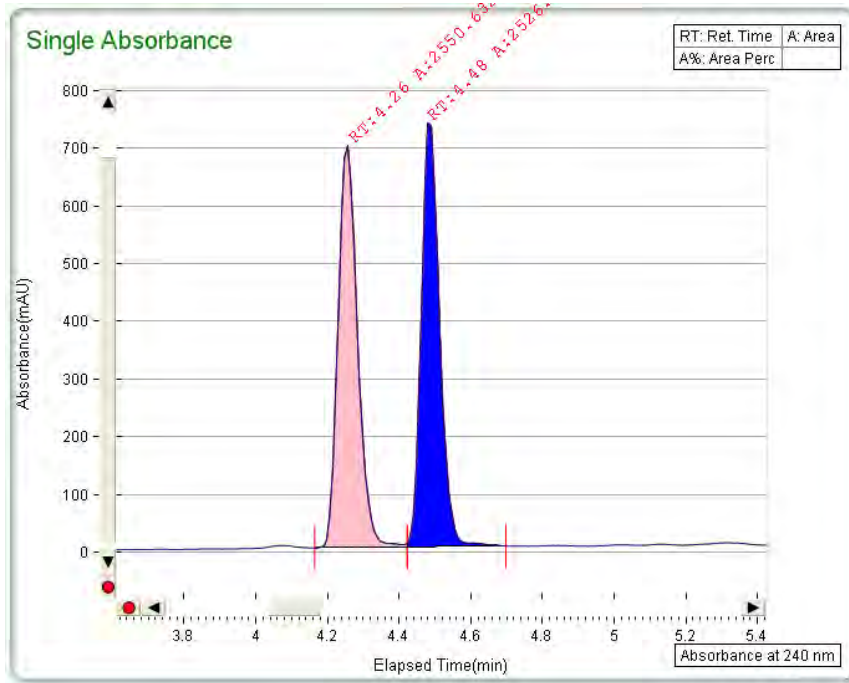

(-)-3m

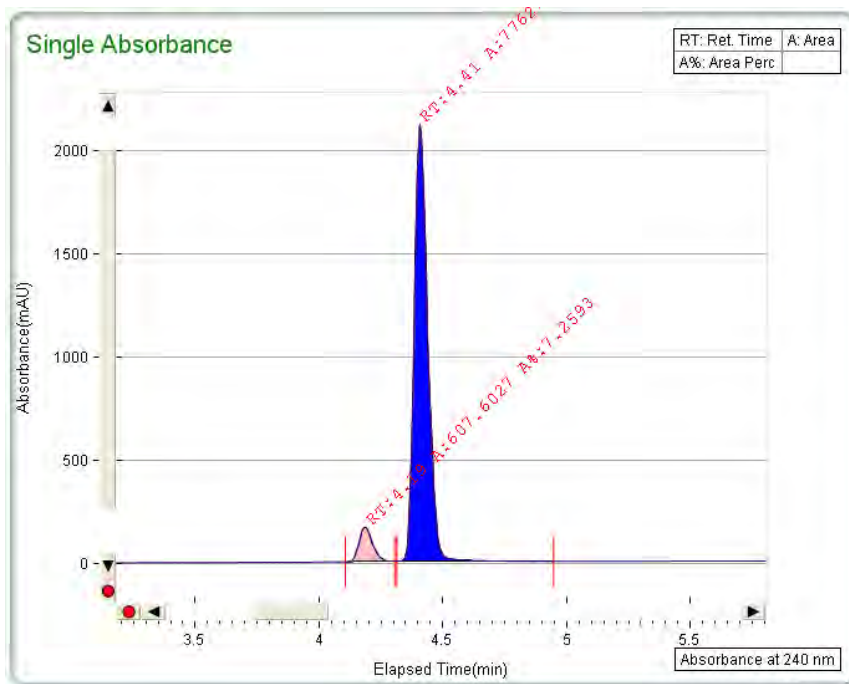



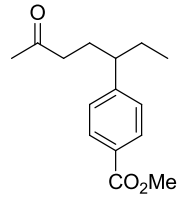

(±)-4a

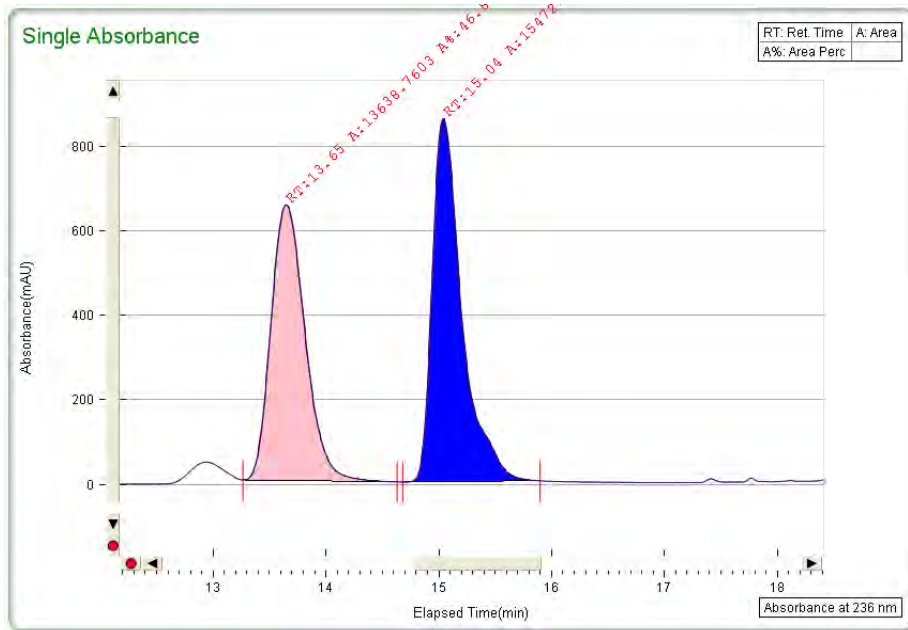

(+)-4a

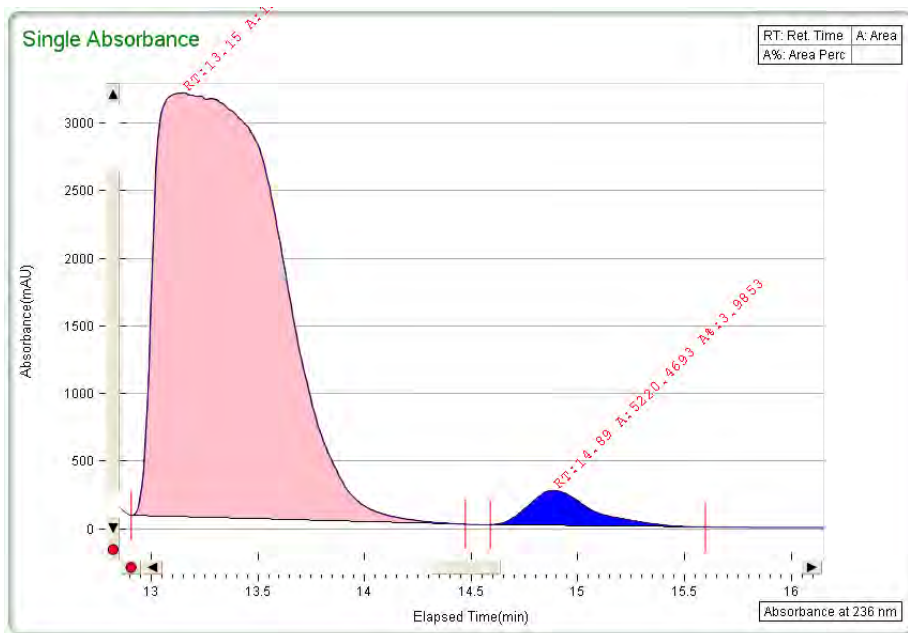

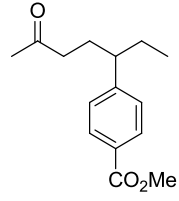

(±)-4a

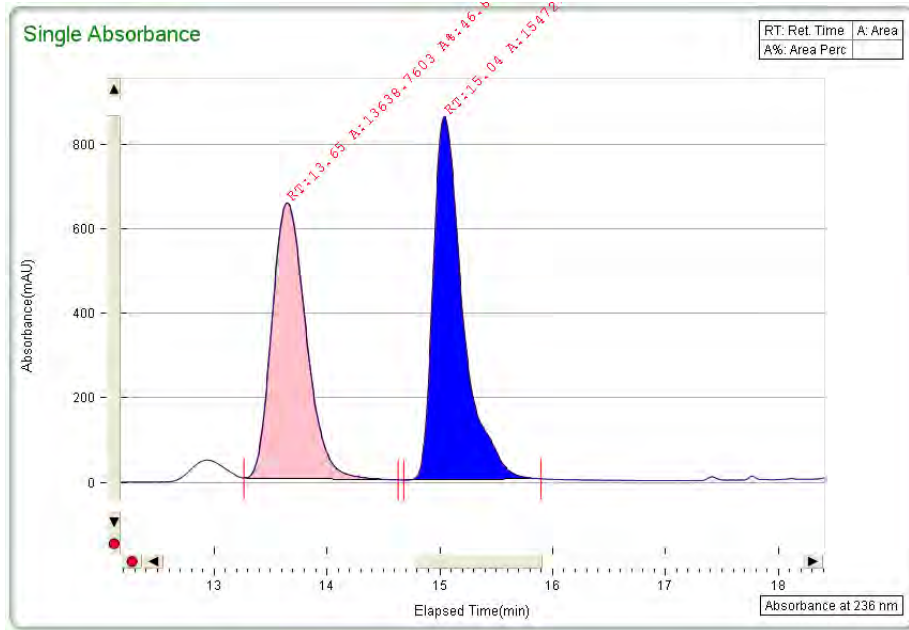

(-)-4a

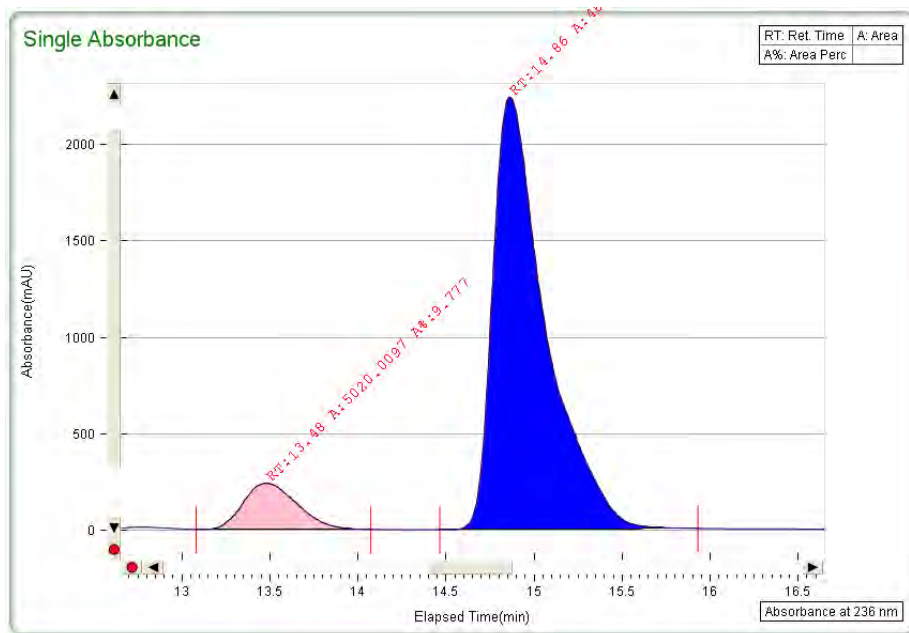

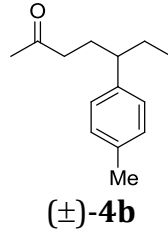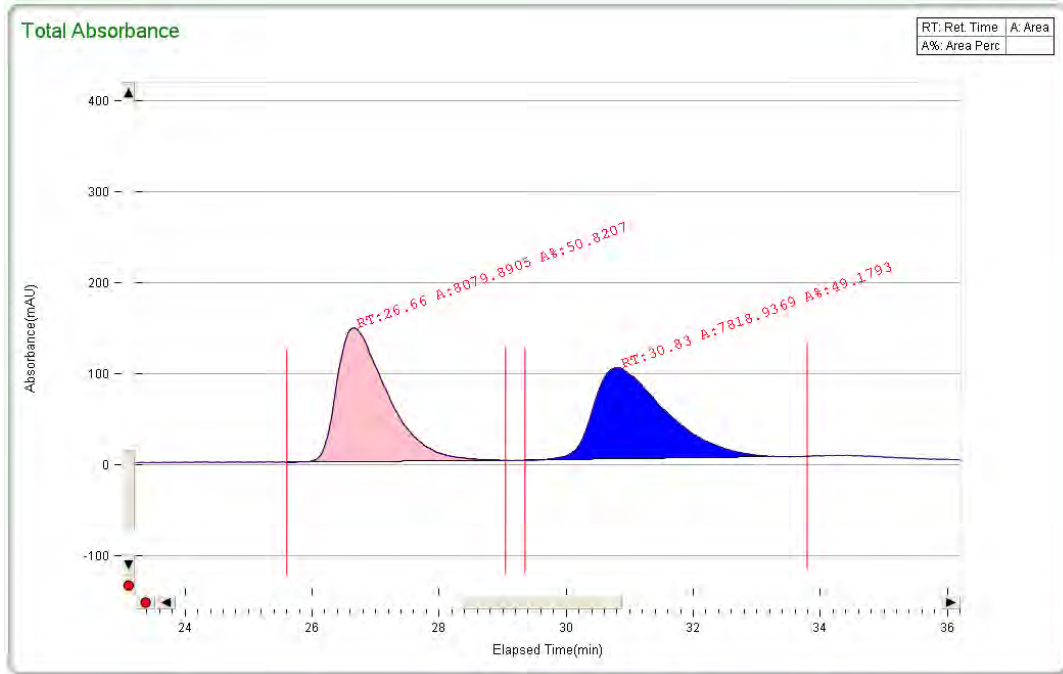

(-)-4b

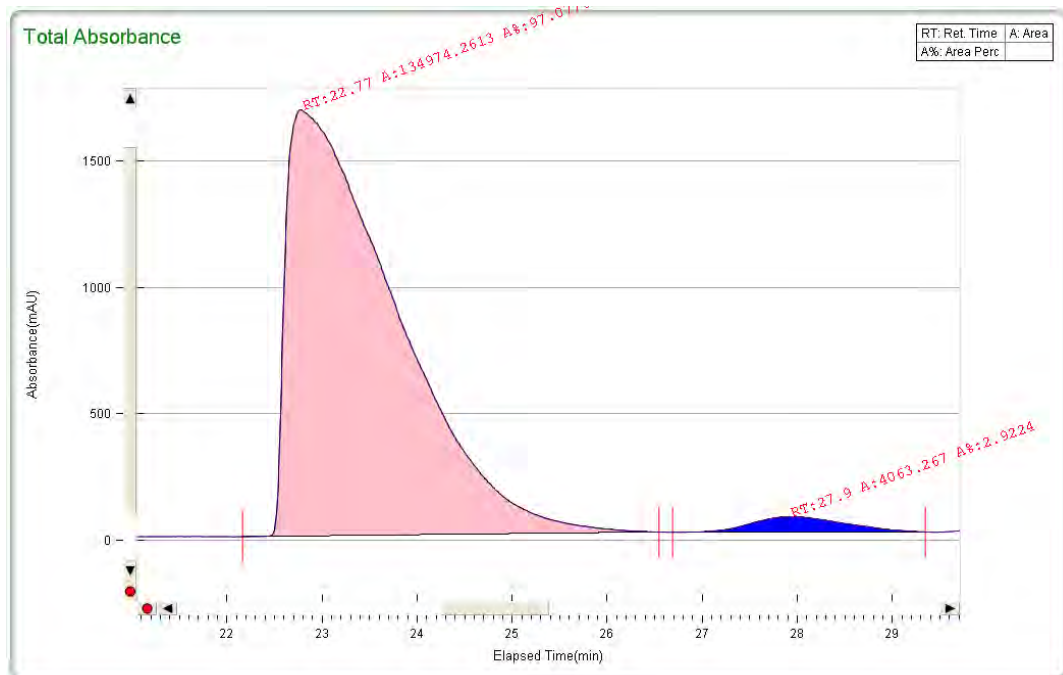

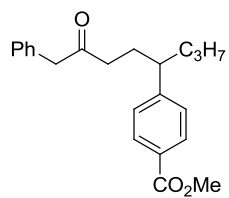

(±)-4c

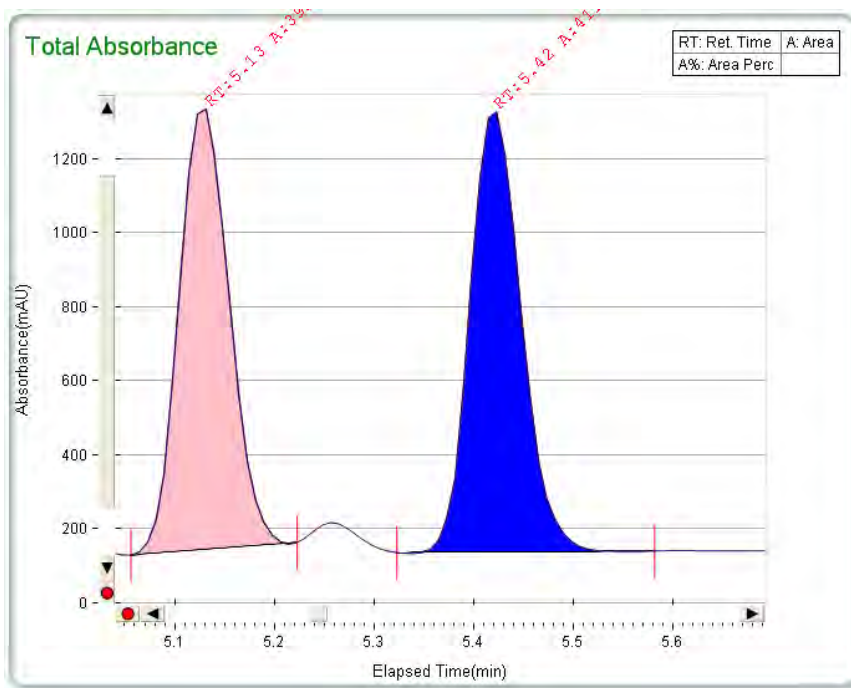

(+)-4c

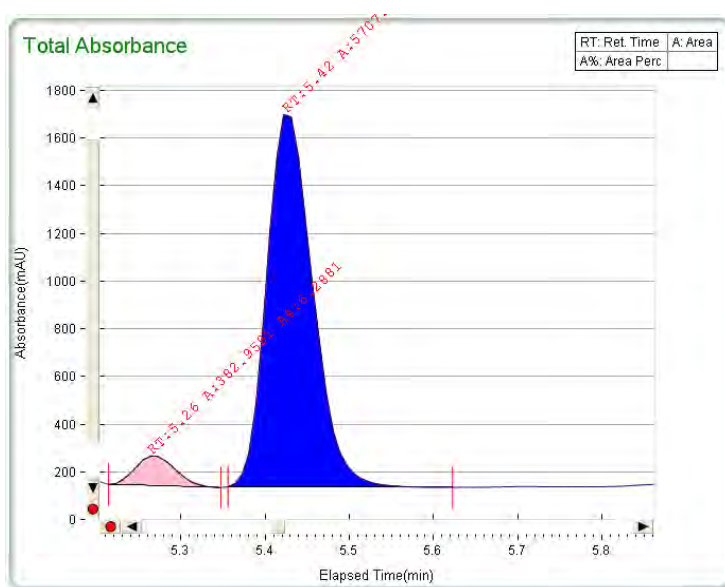

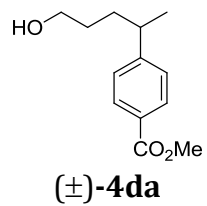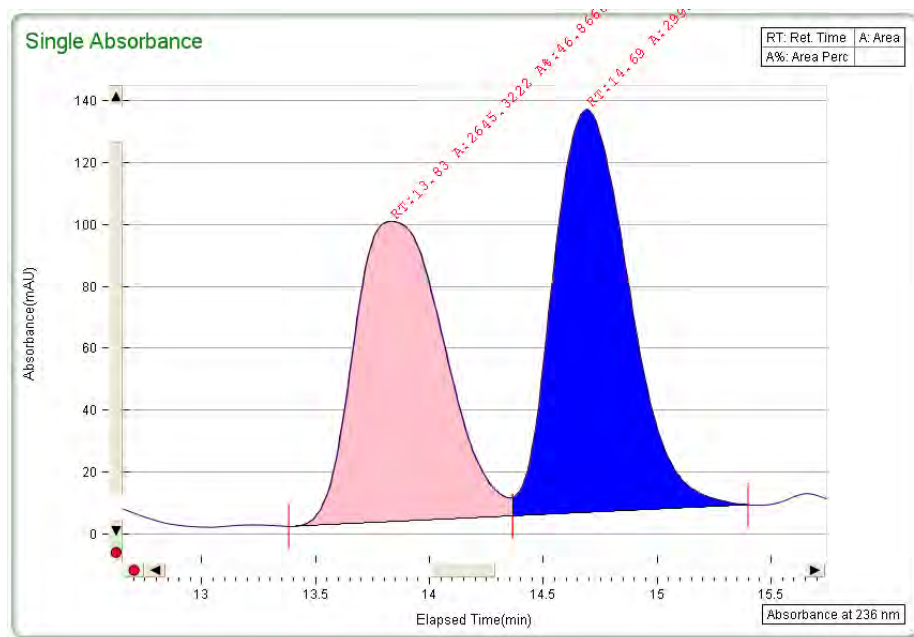

(+)-4da

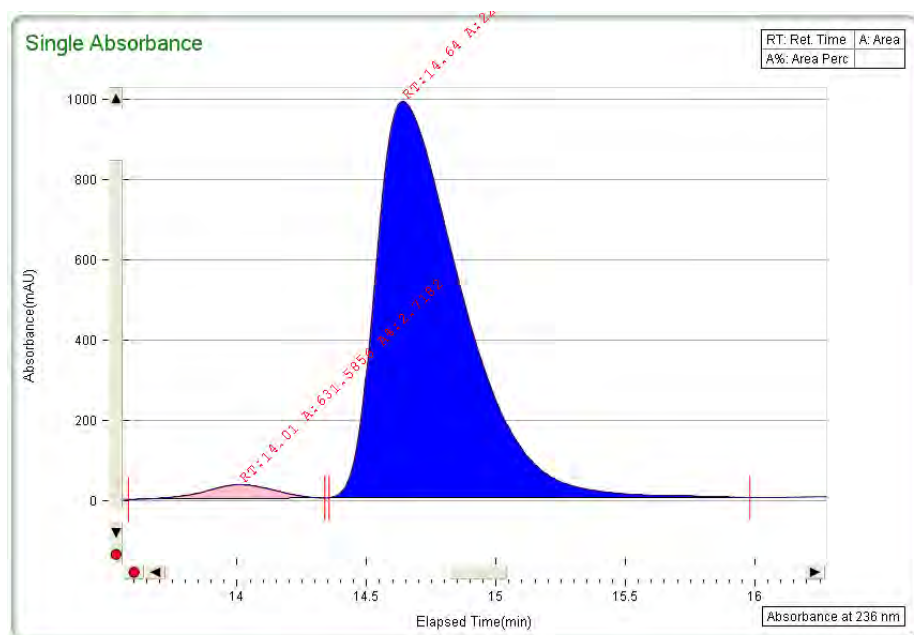

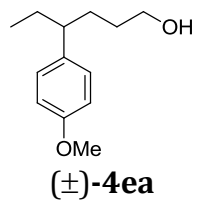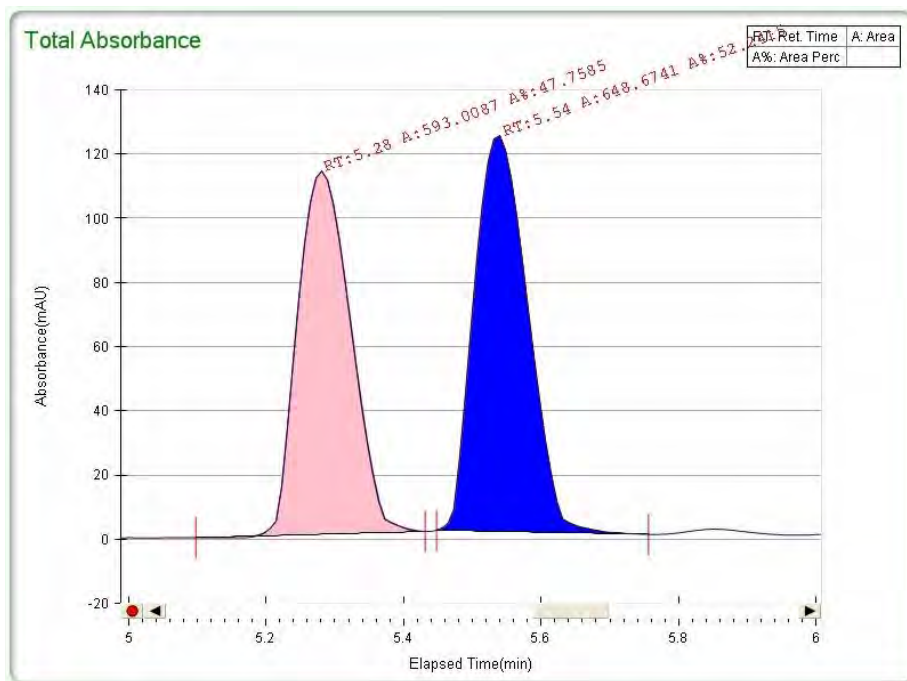

(+)-4ea

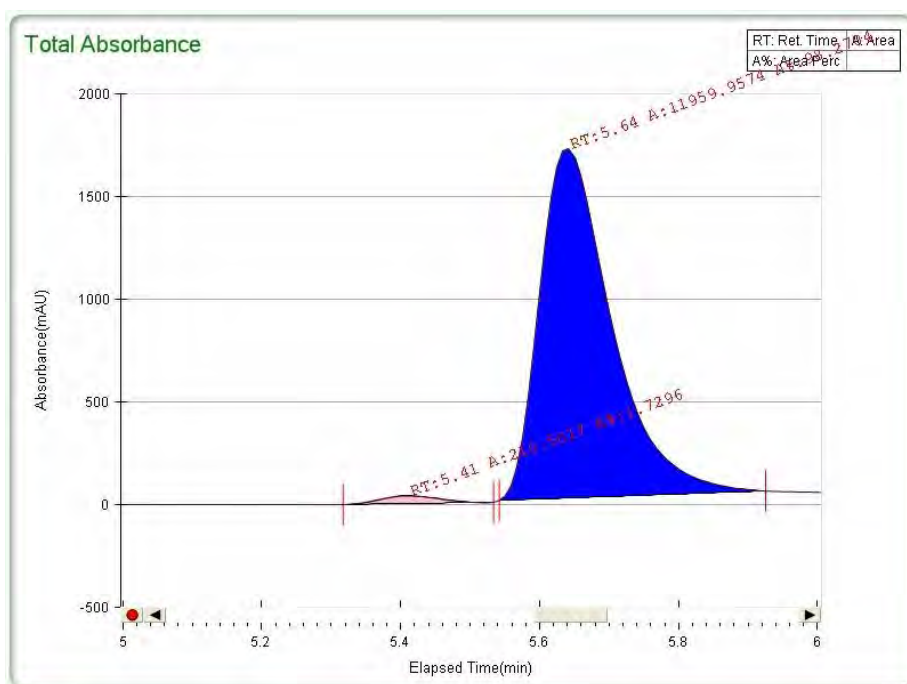

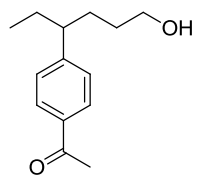

(±)-4fa

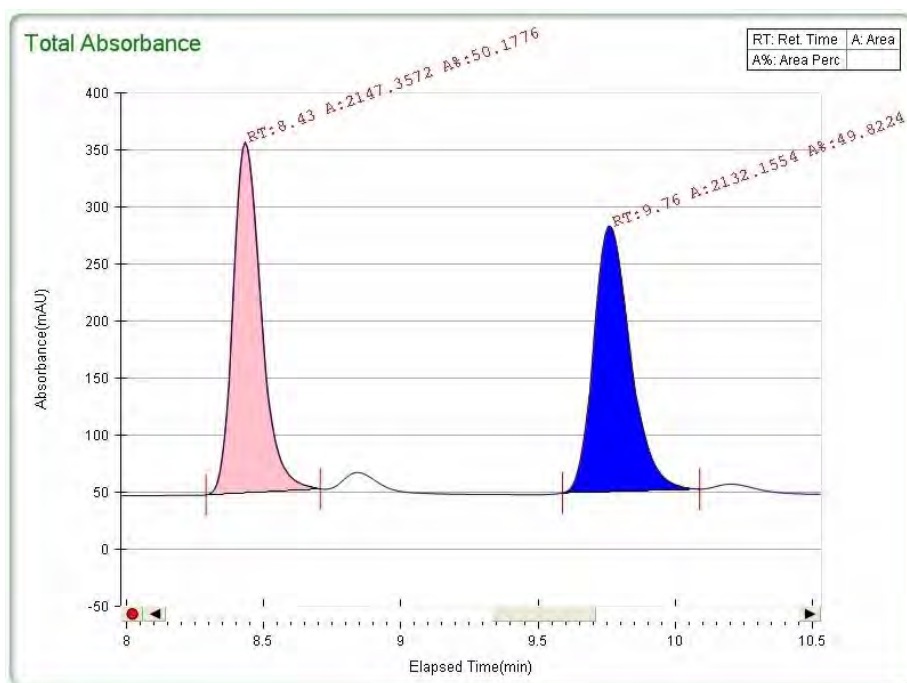

(+)-4fa

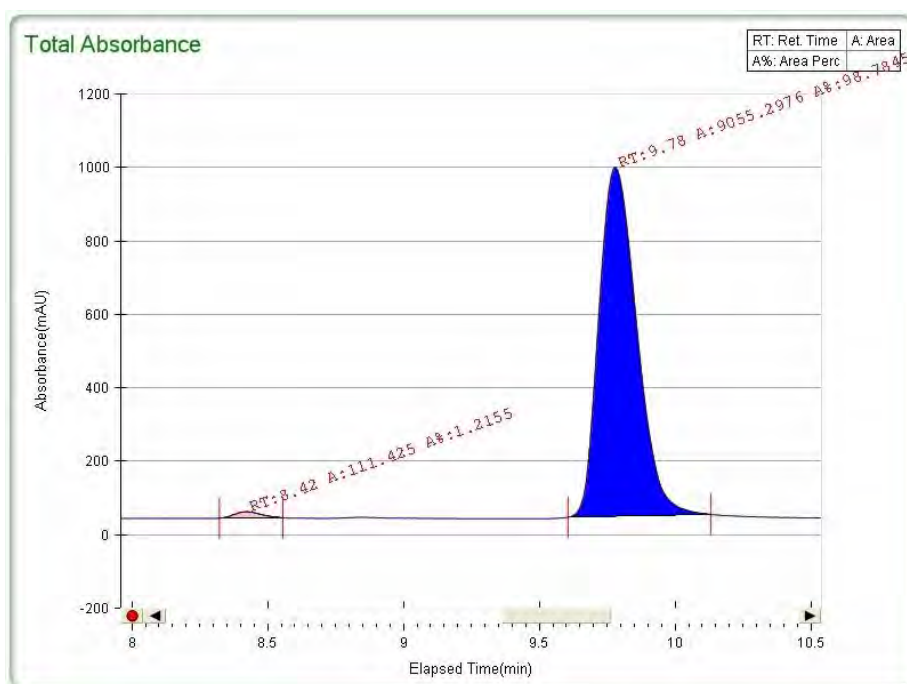

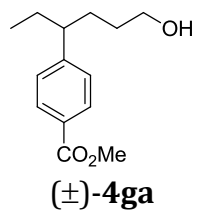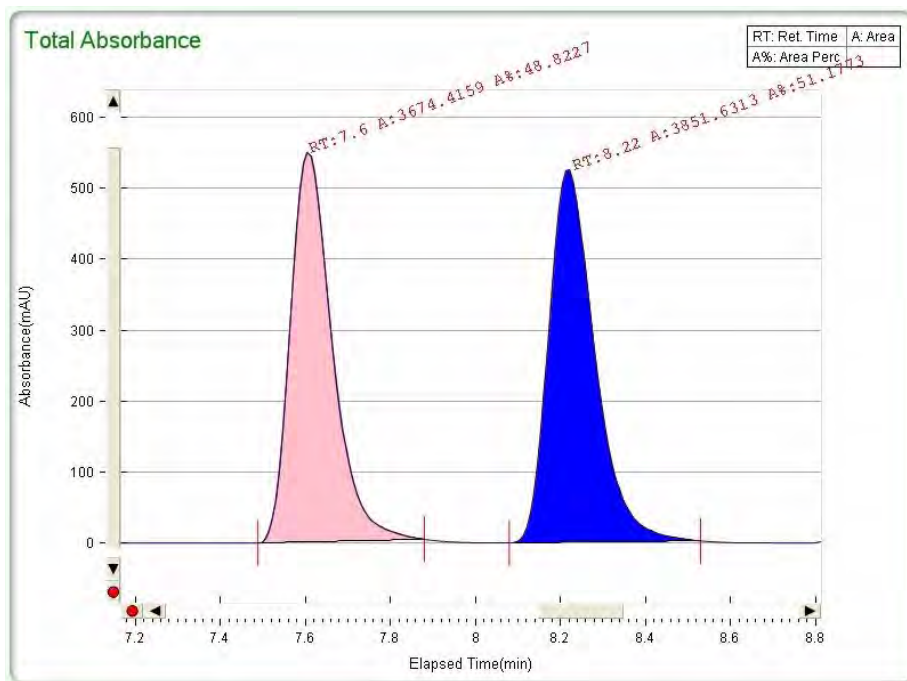

(+)-4ga

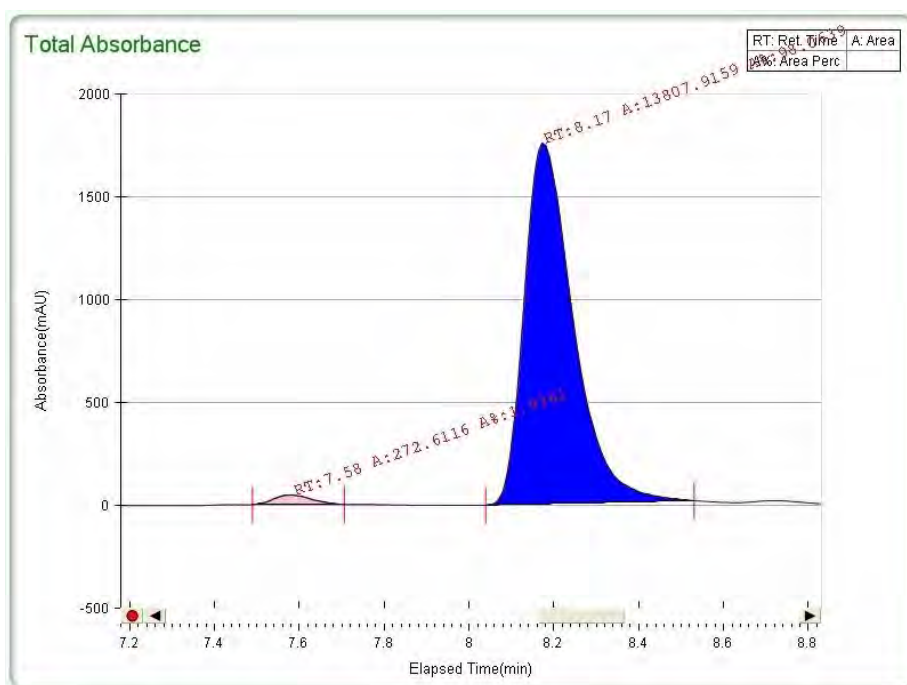



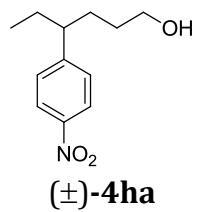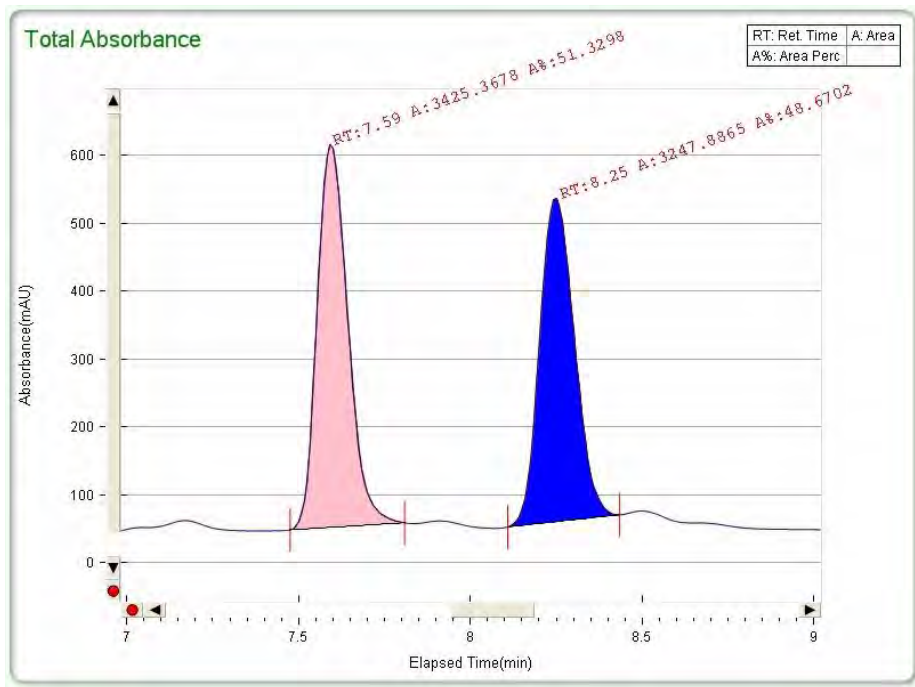

(-)-4ha

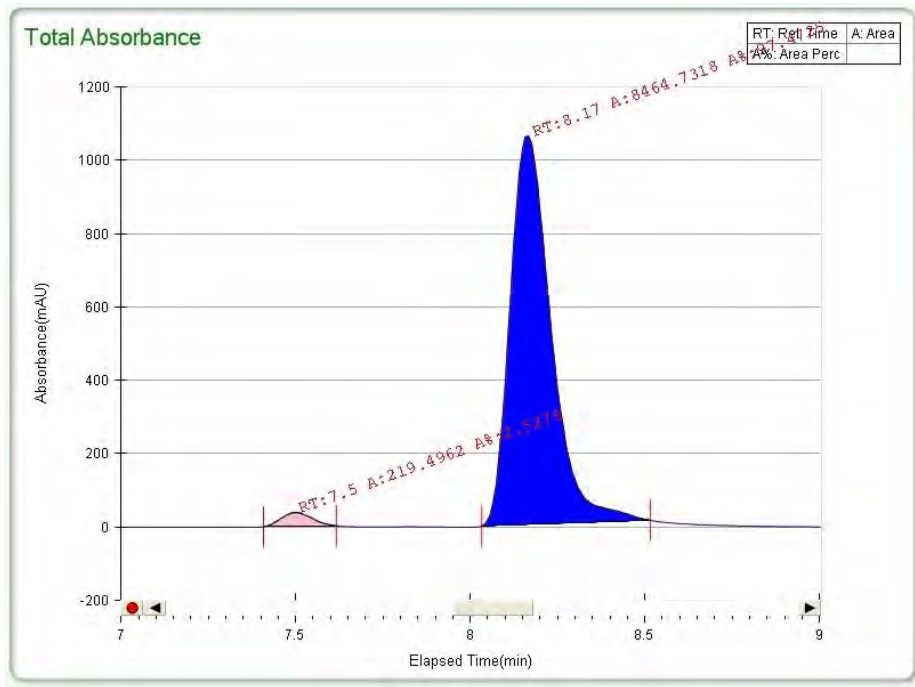

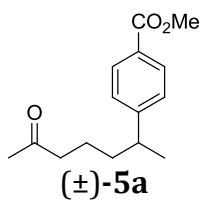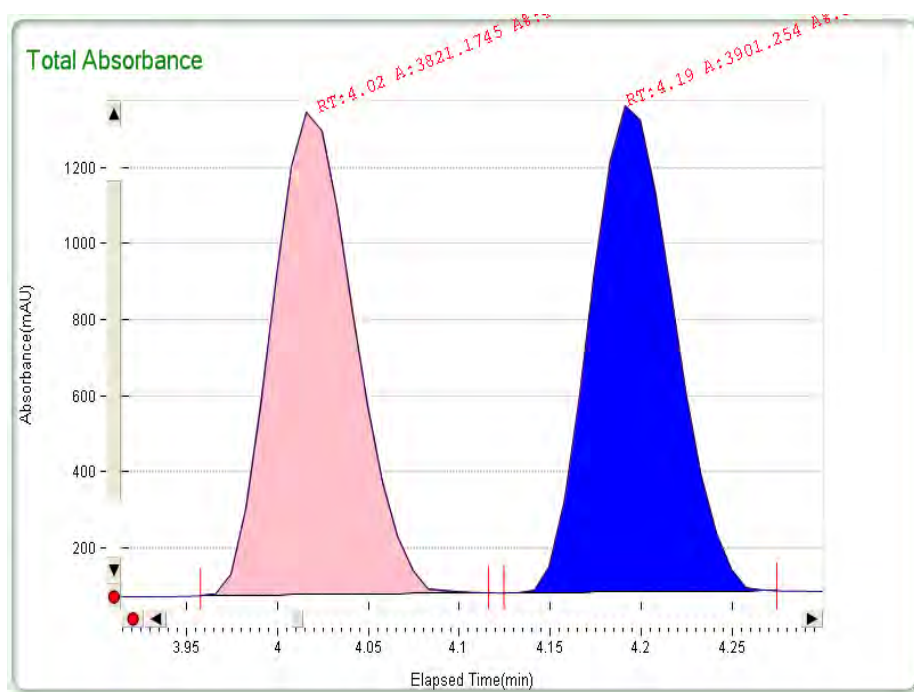

(+)-5a

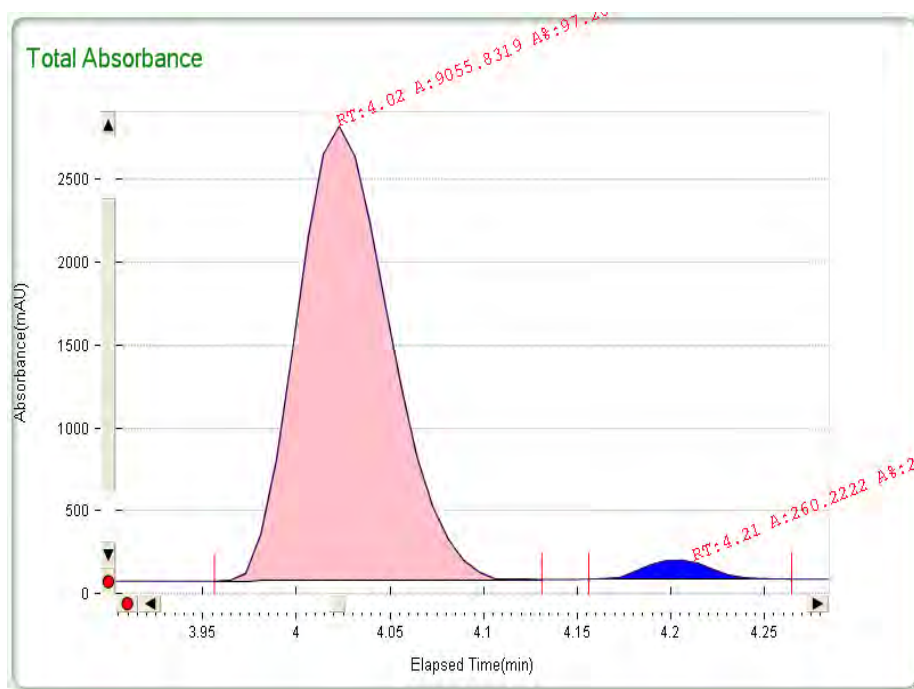

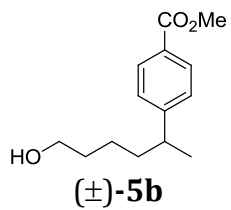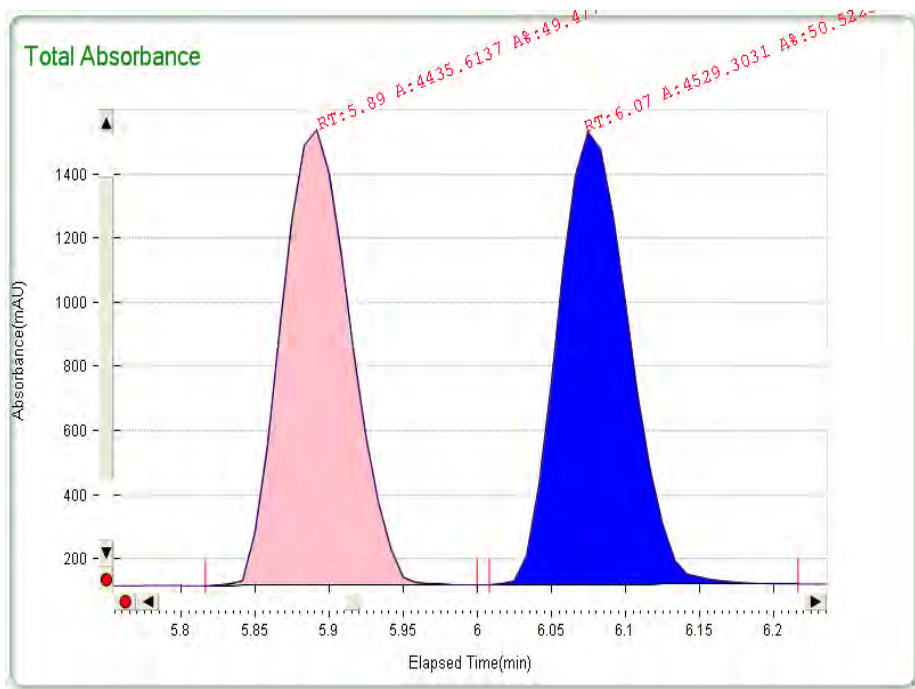

(+)-5b

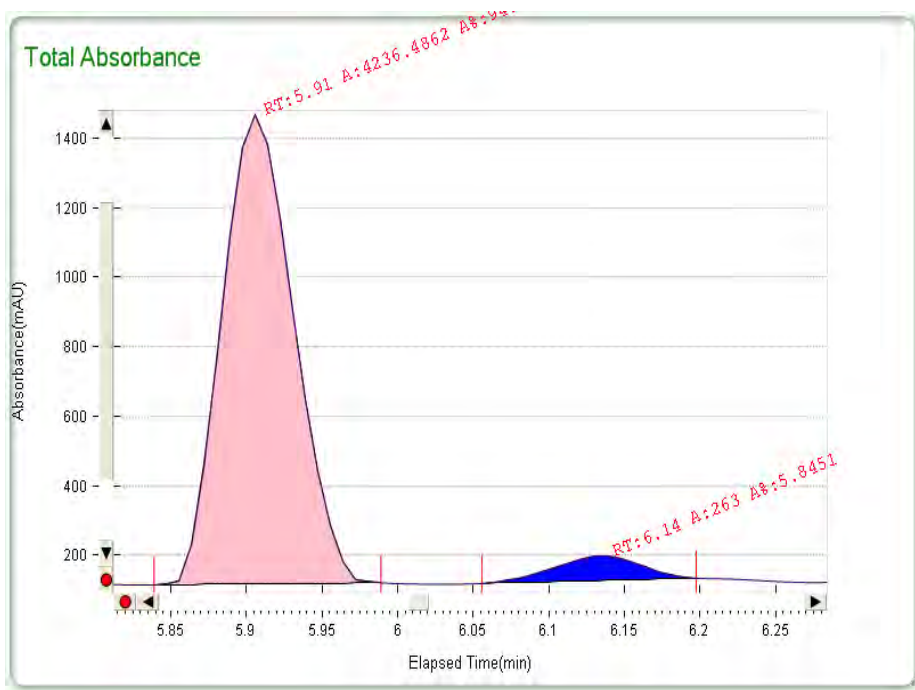

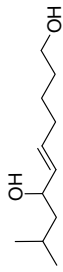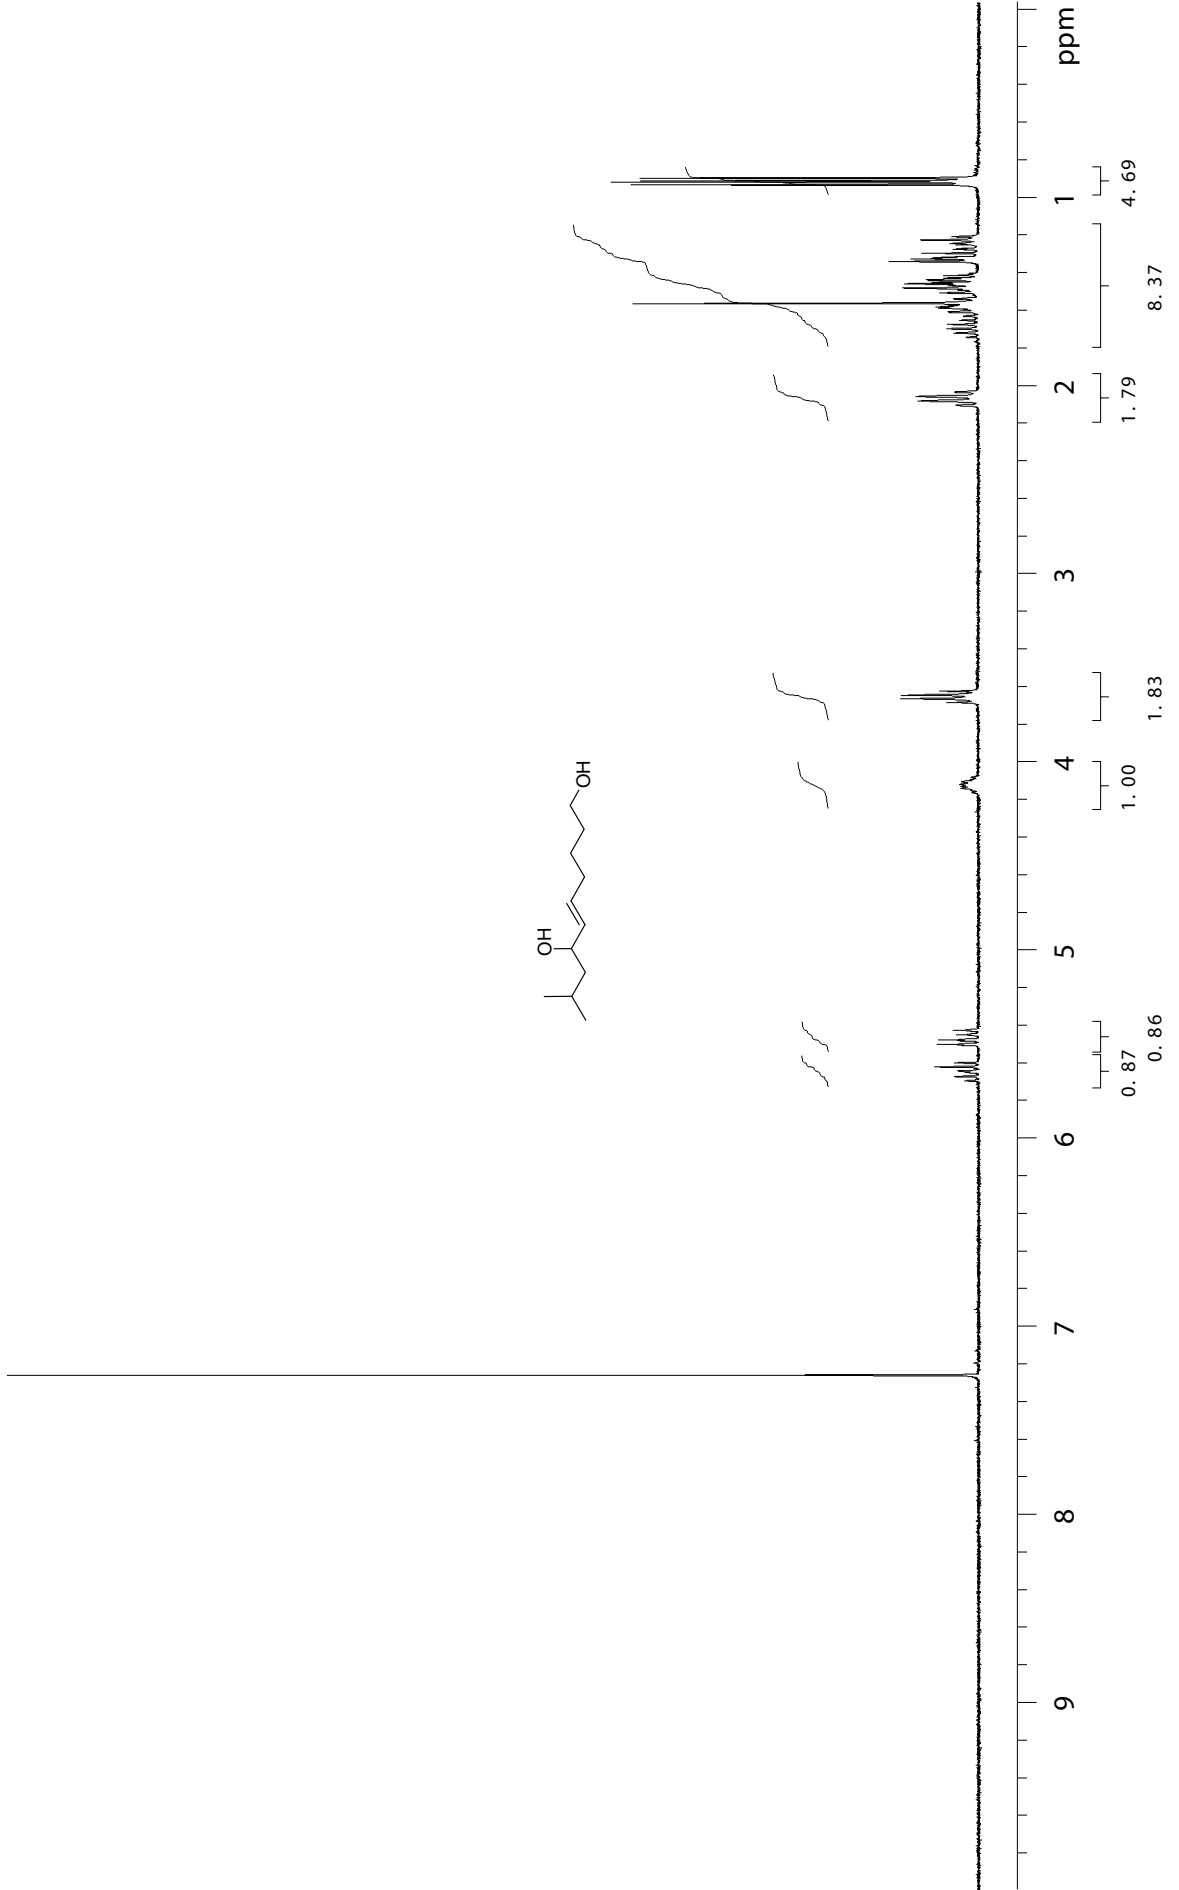

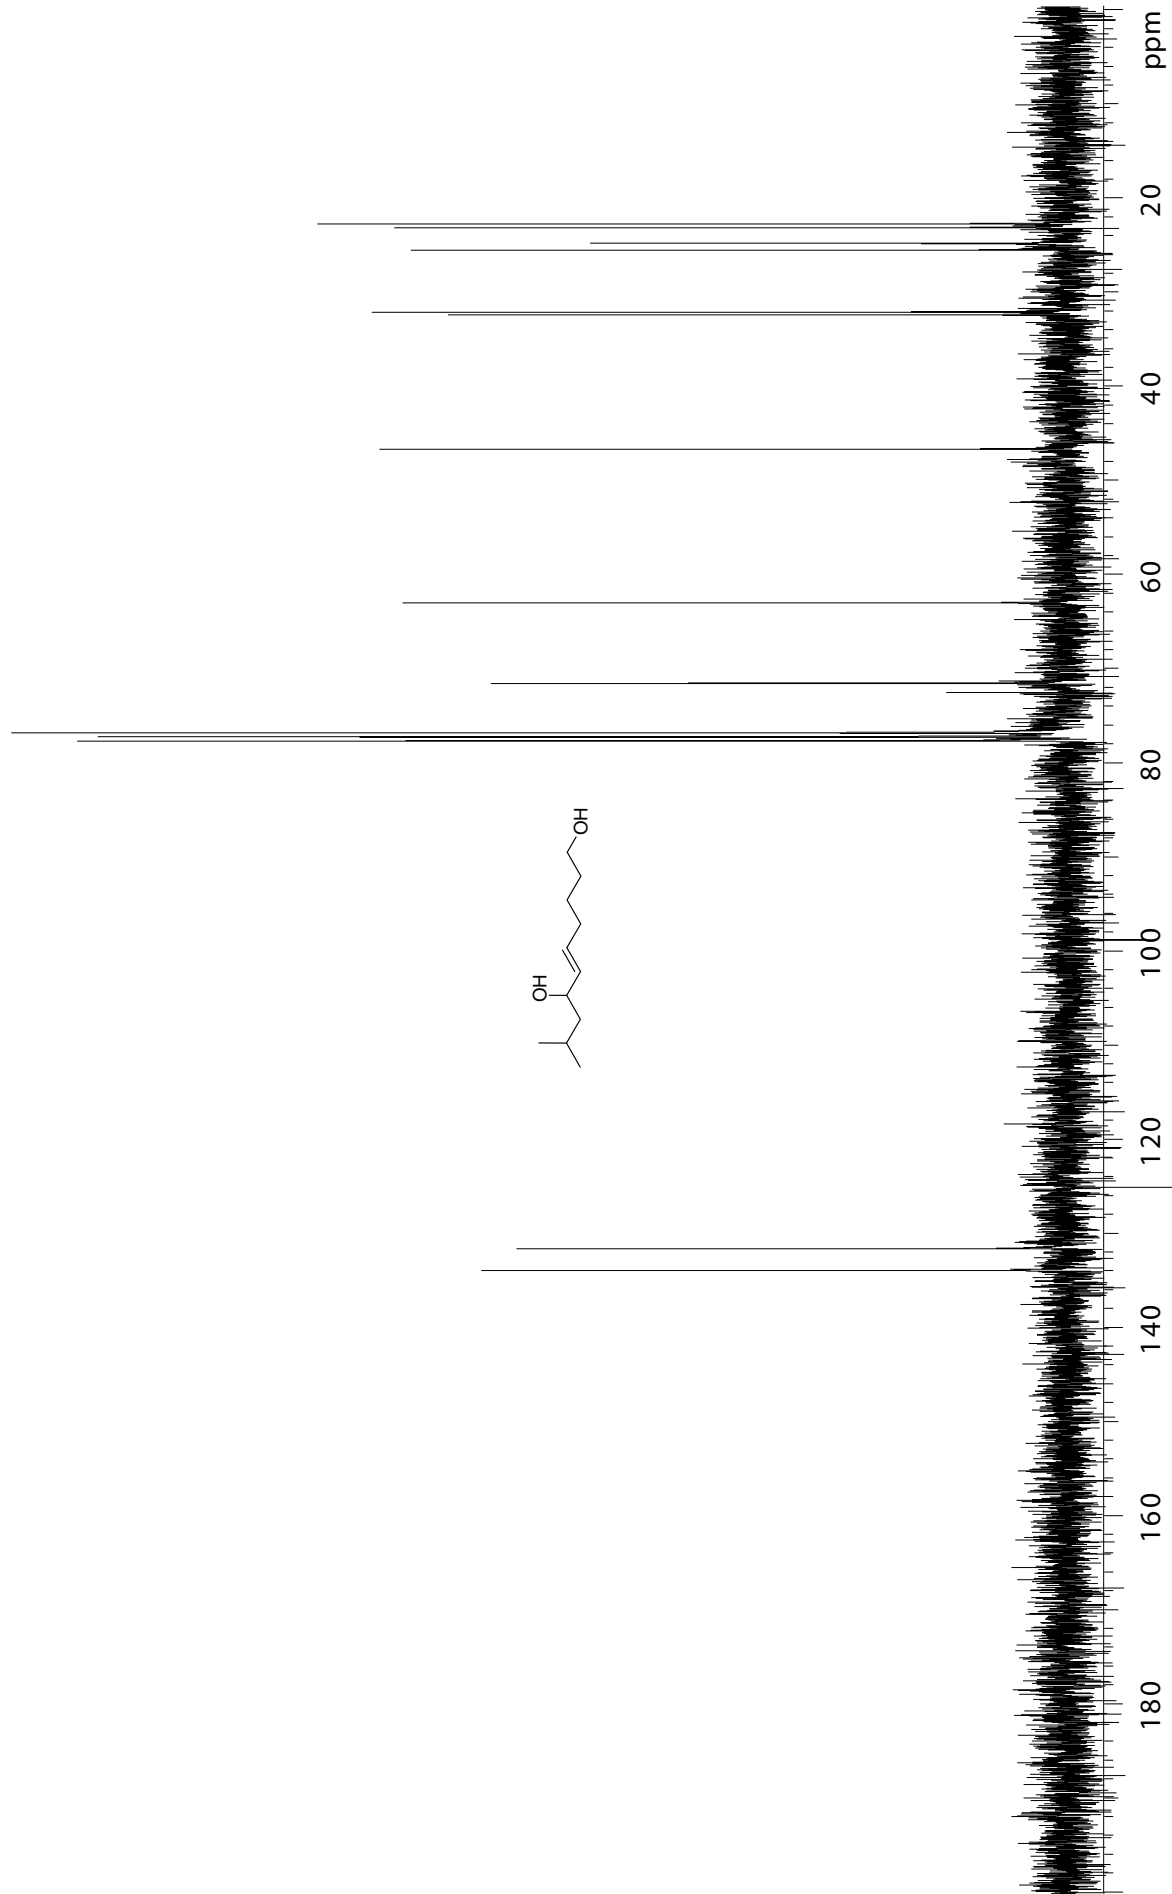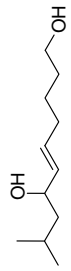

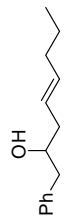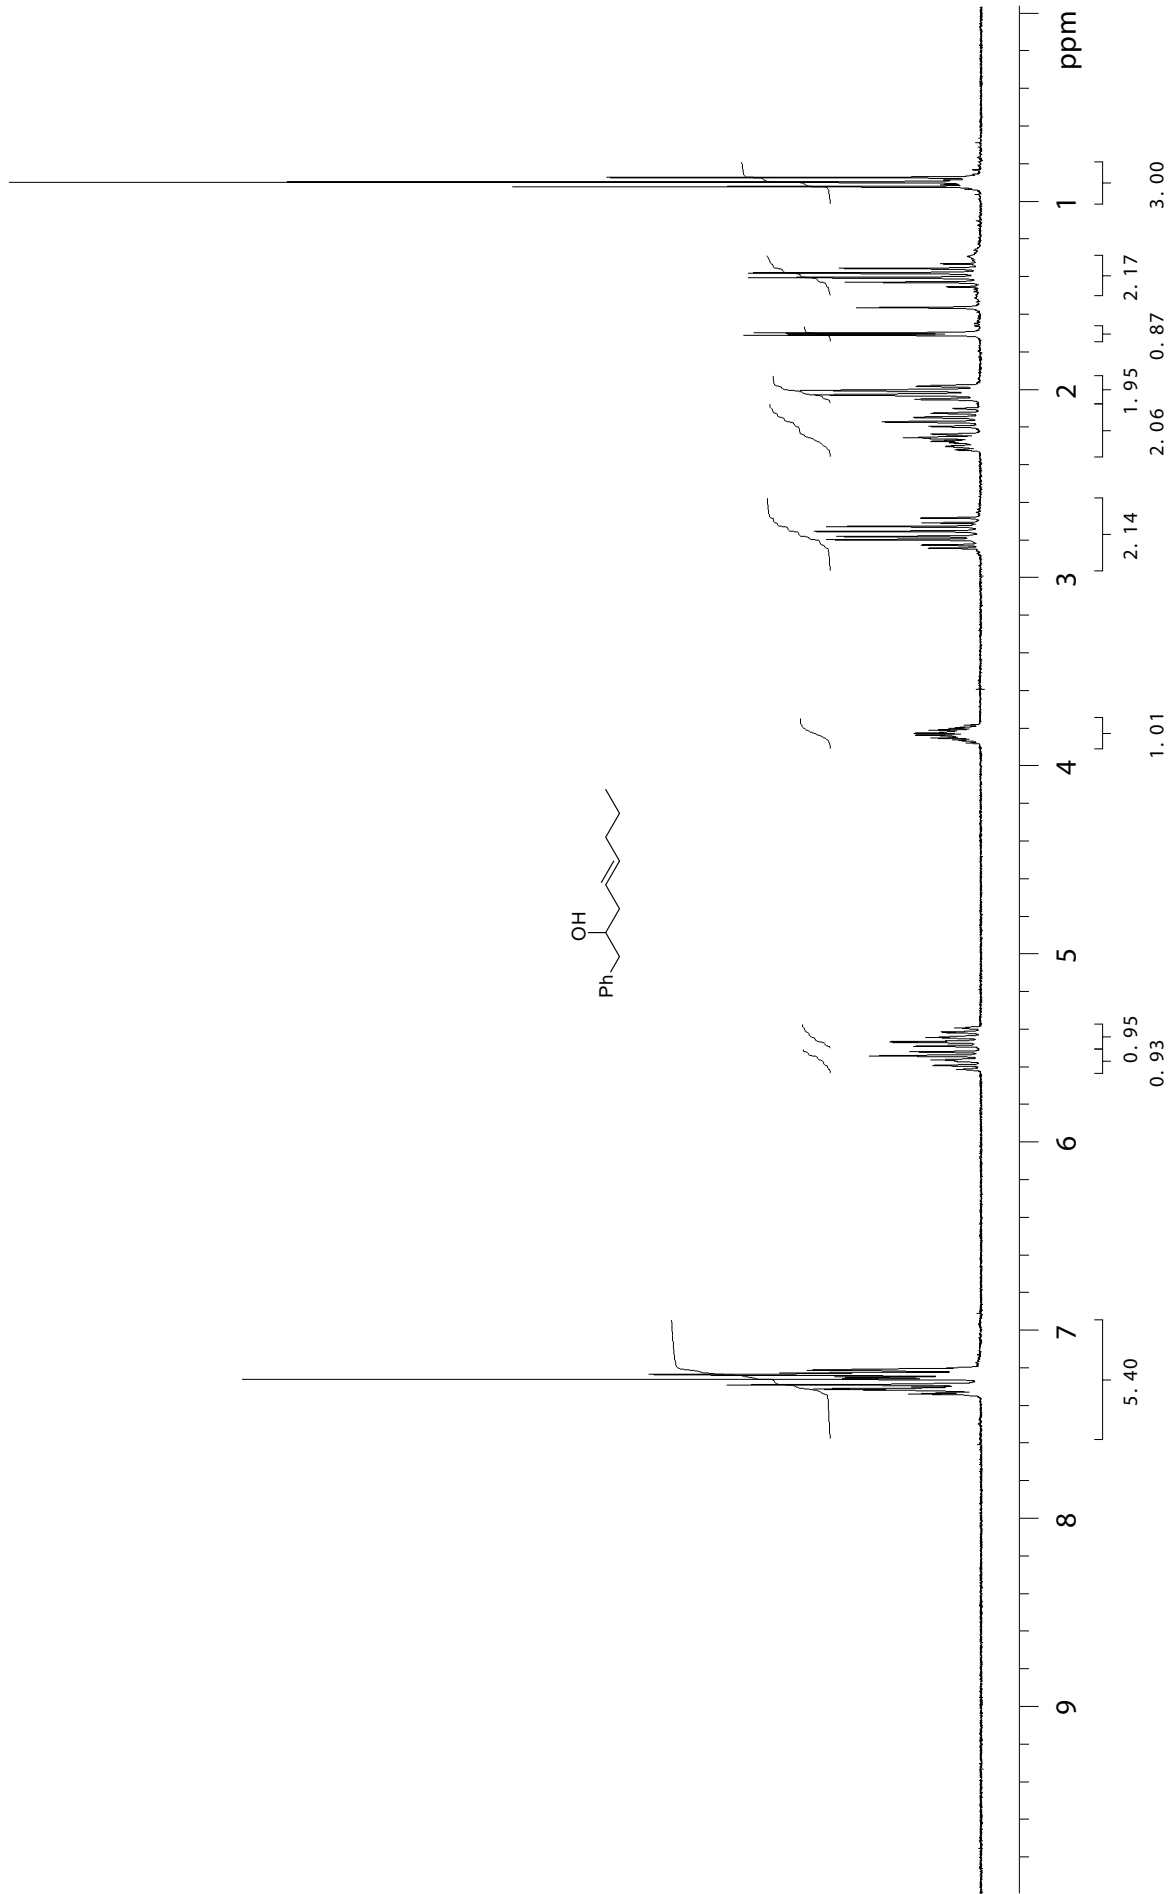

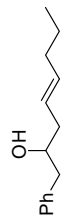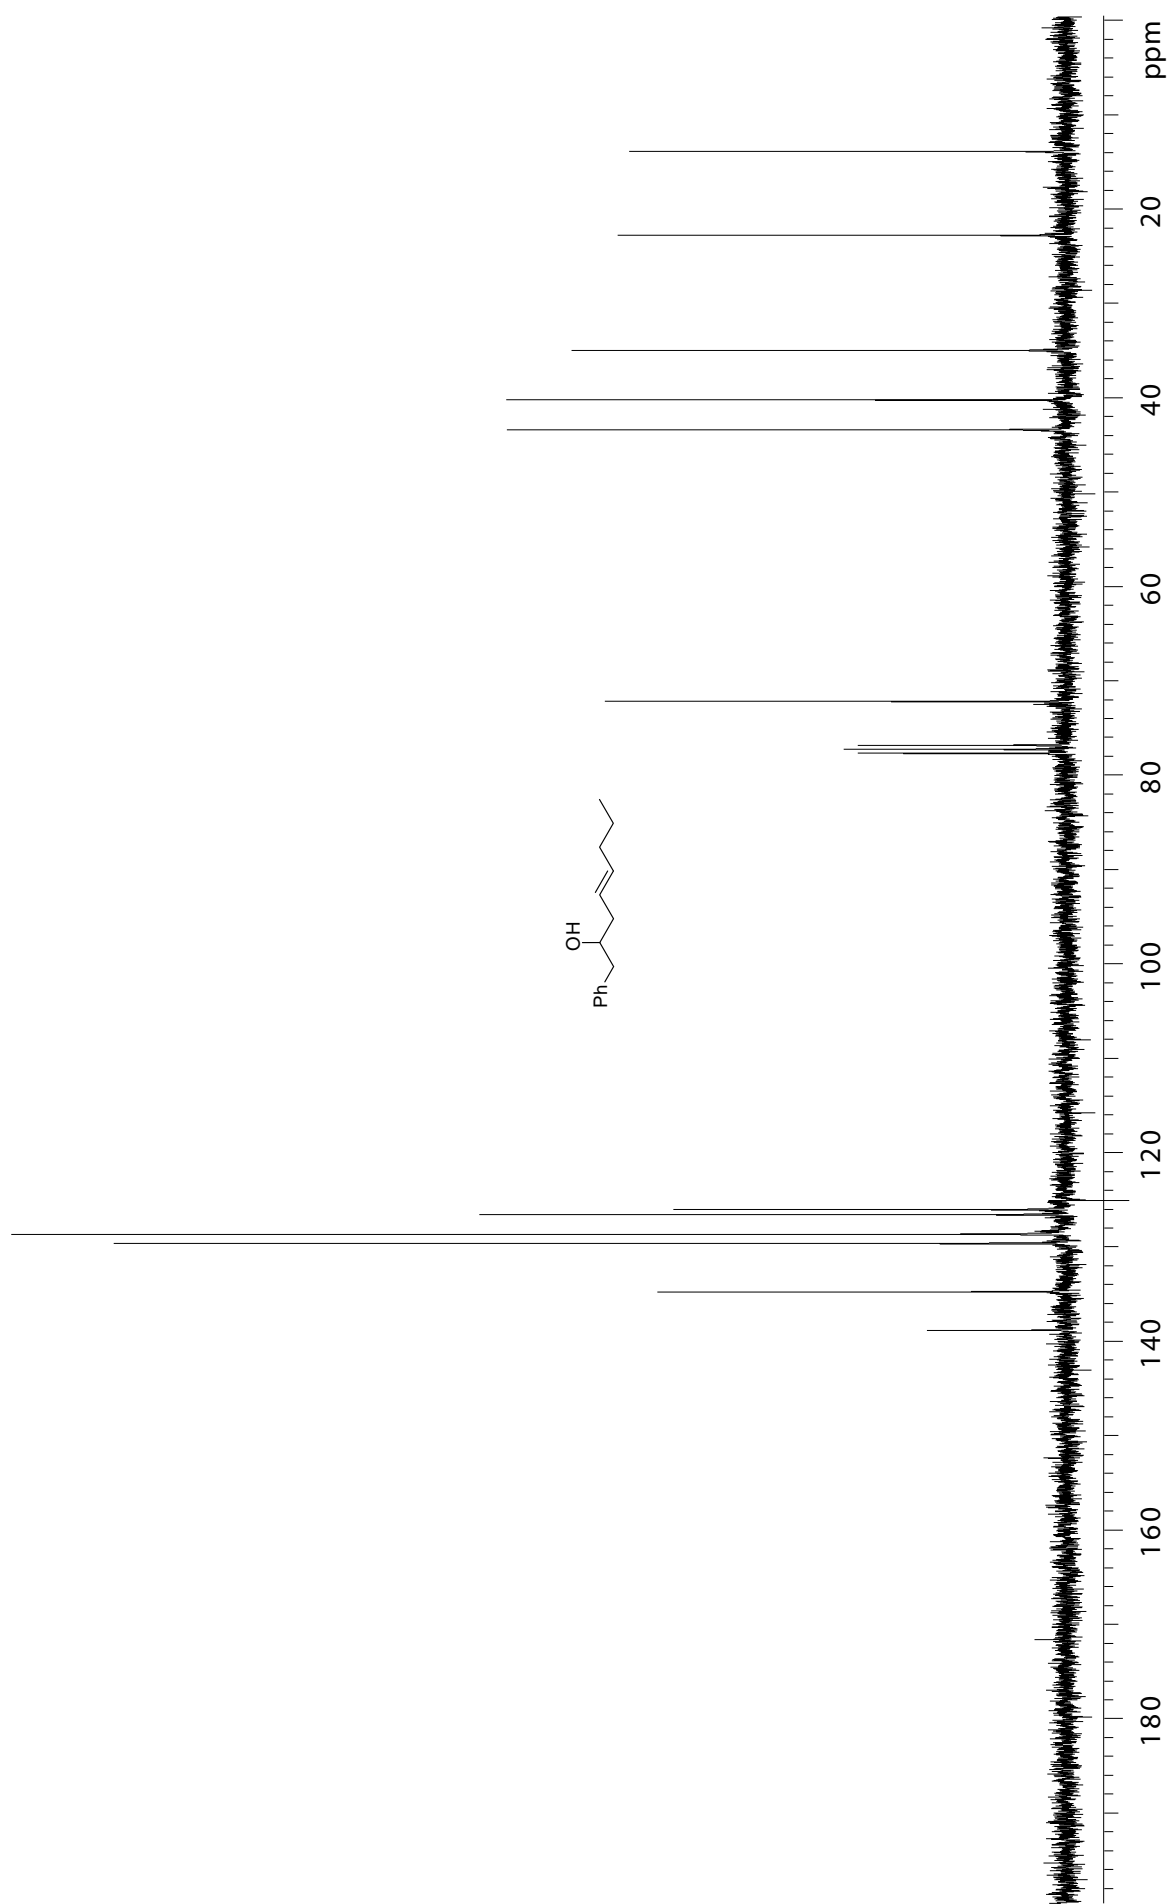

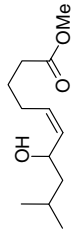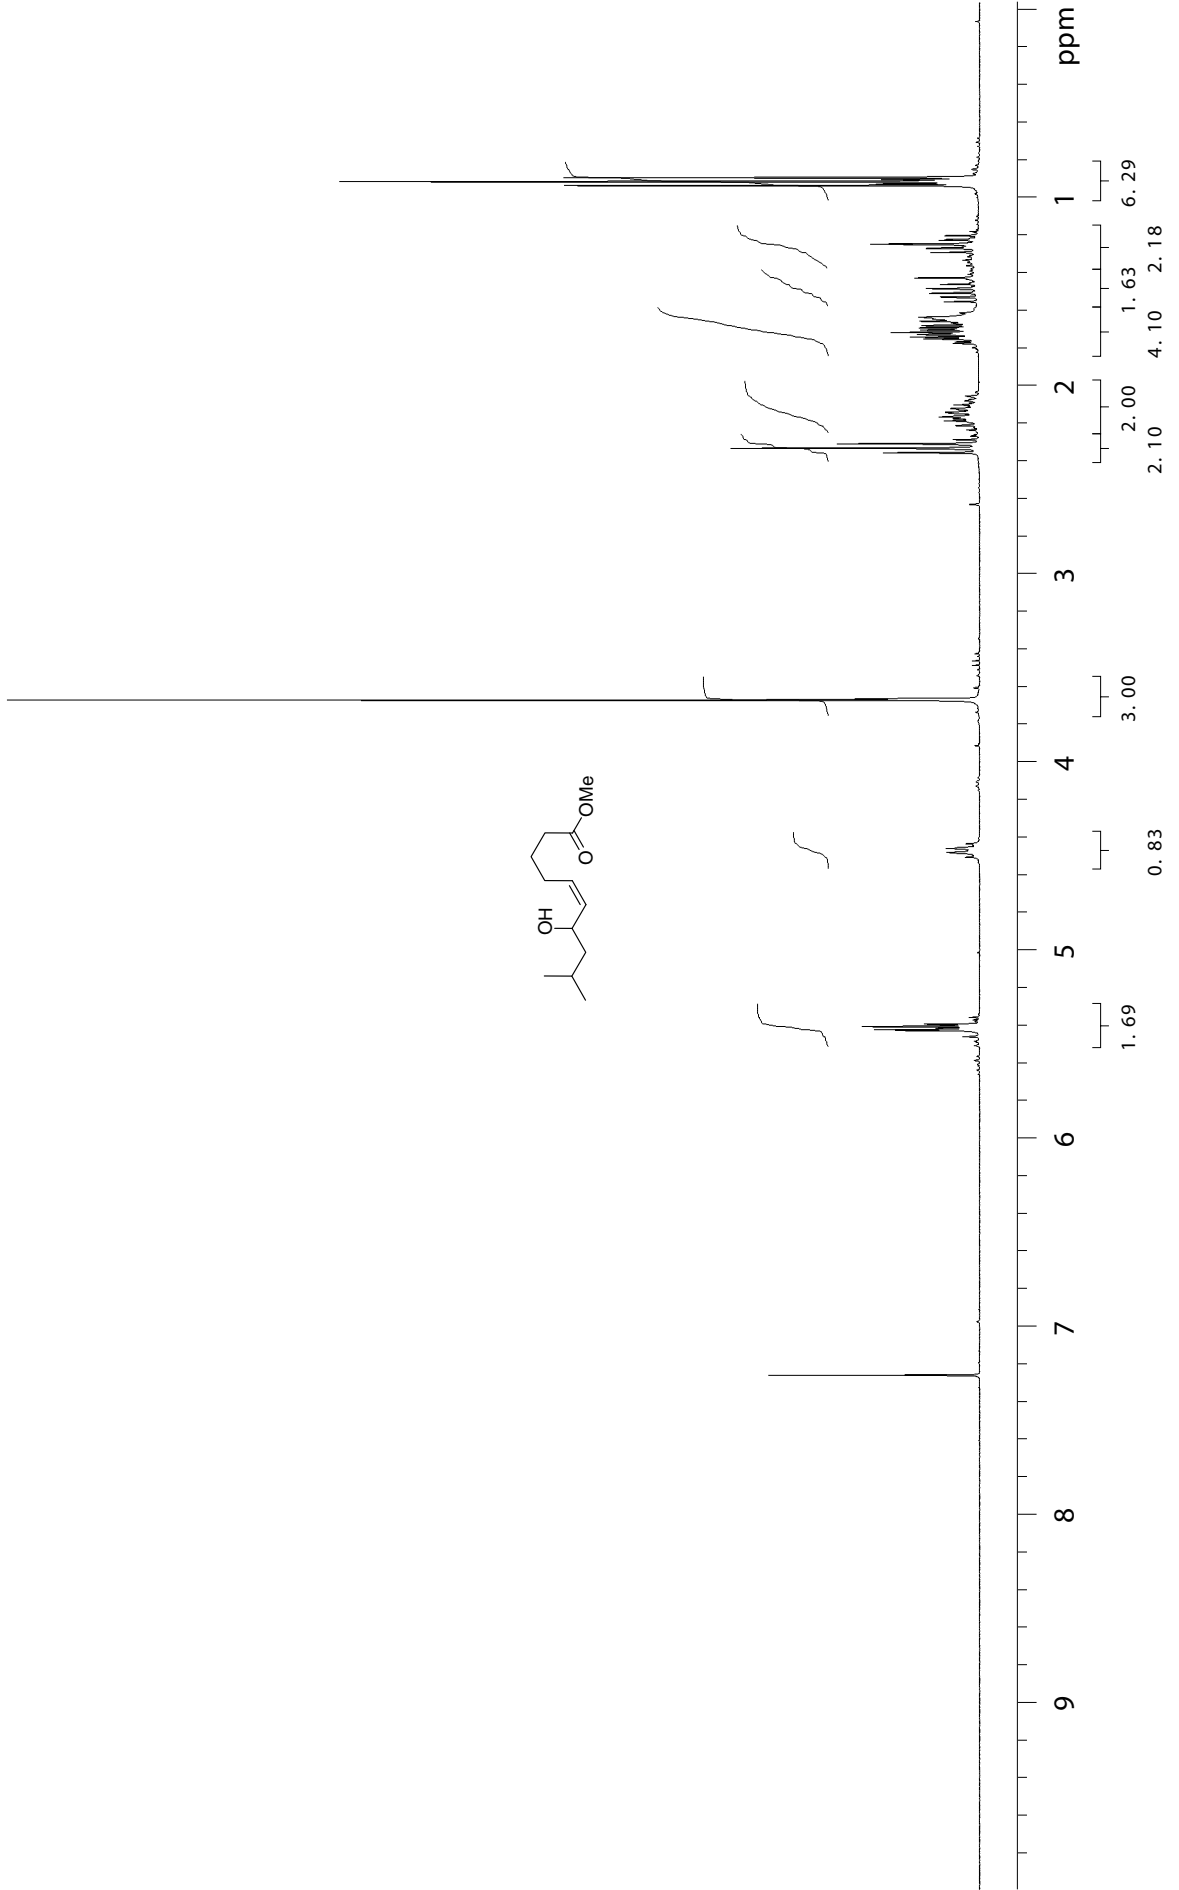



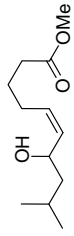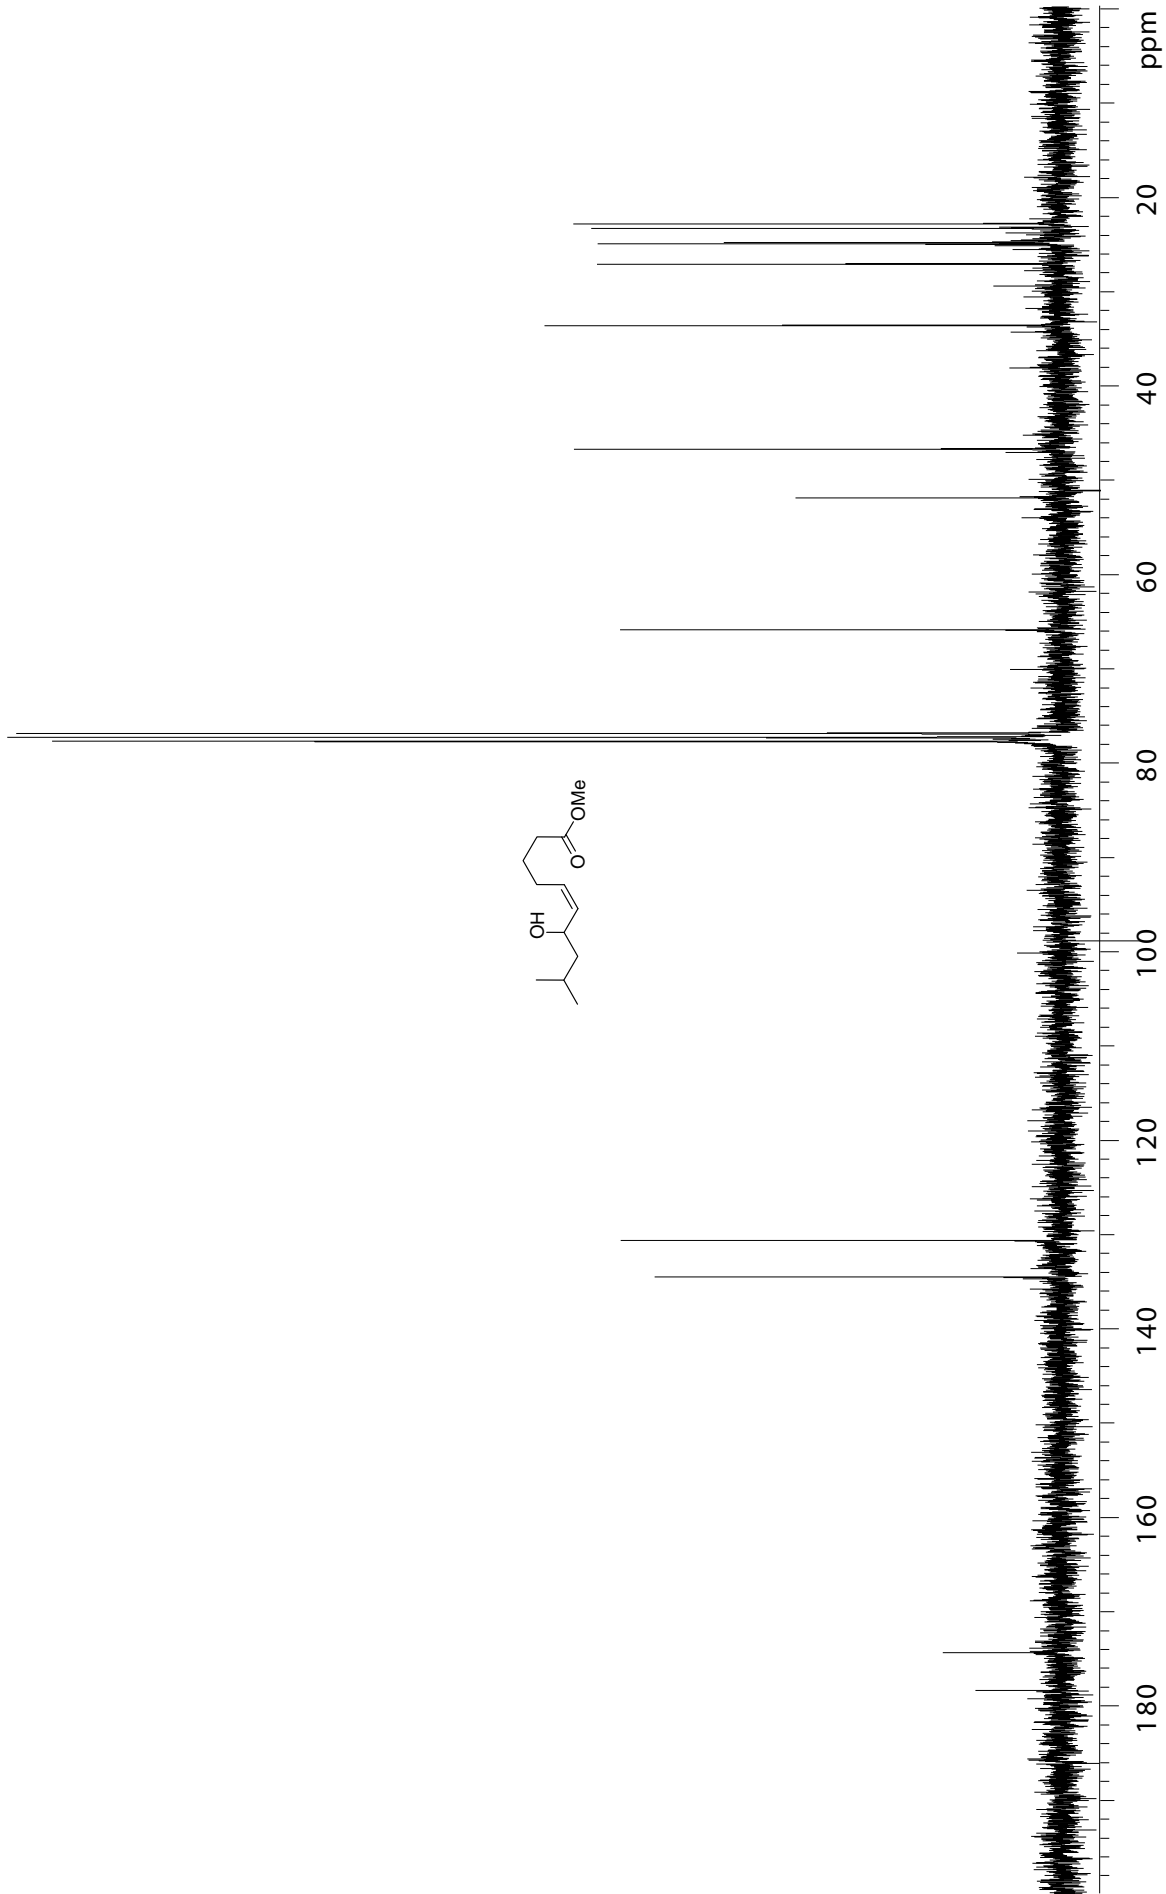

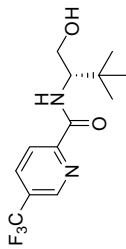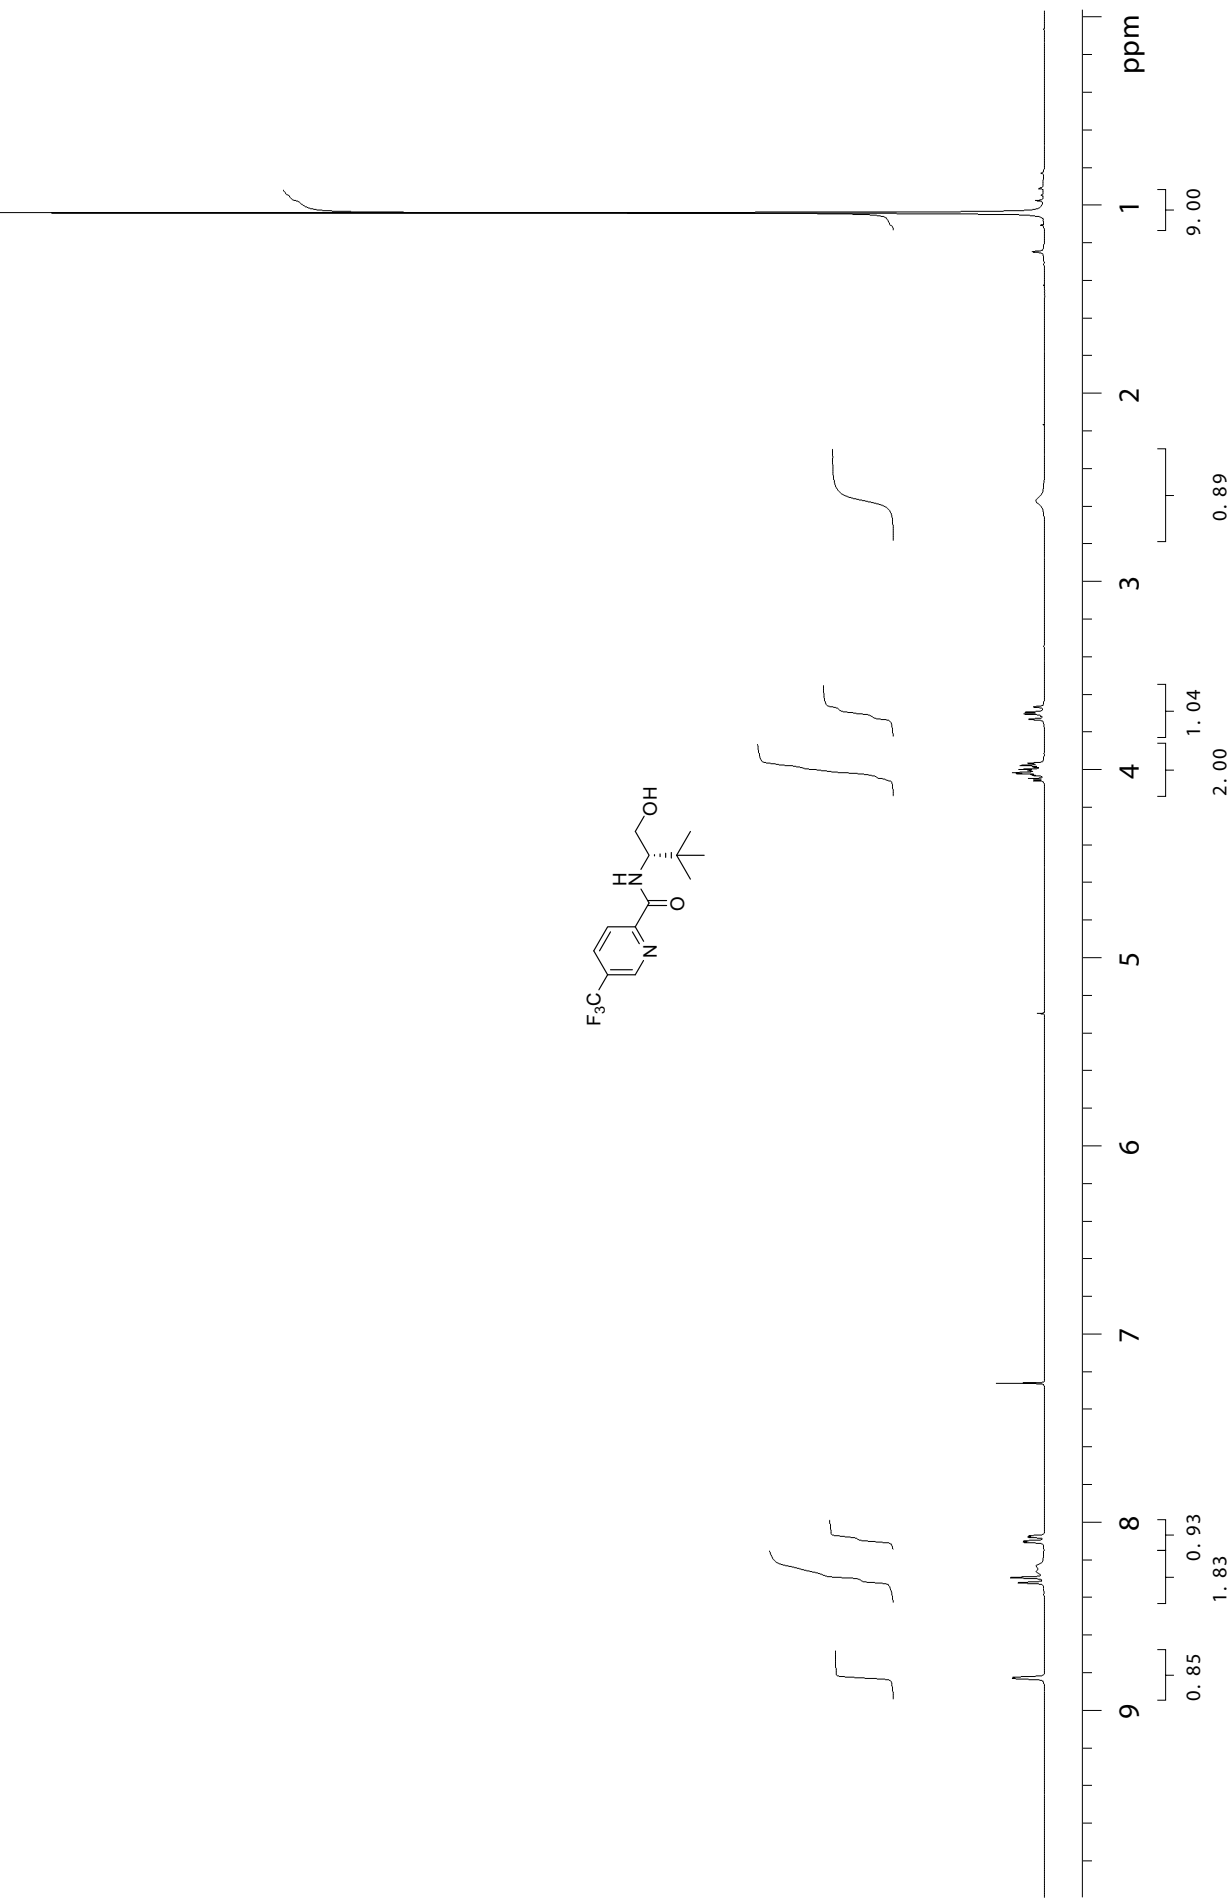

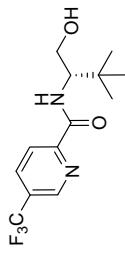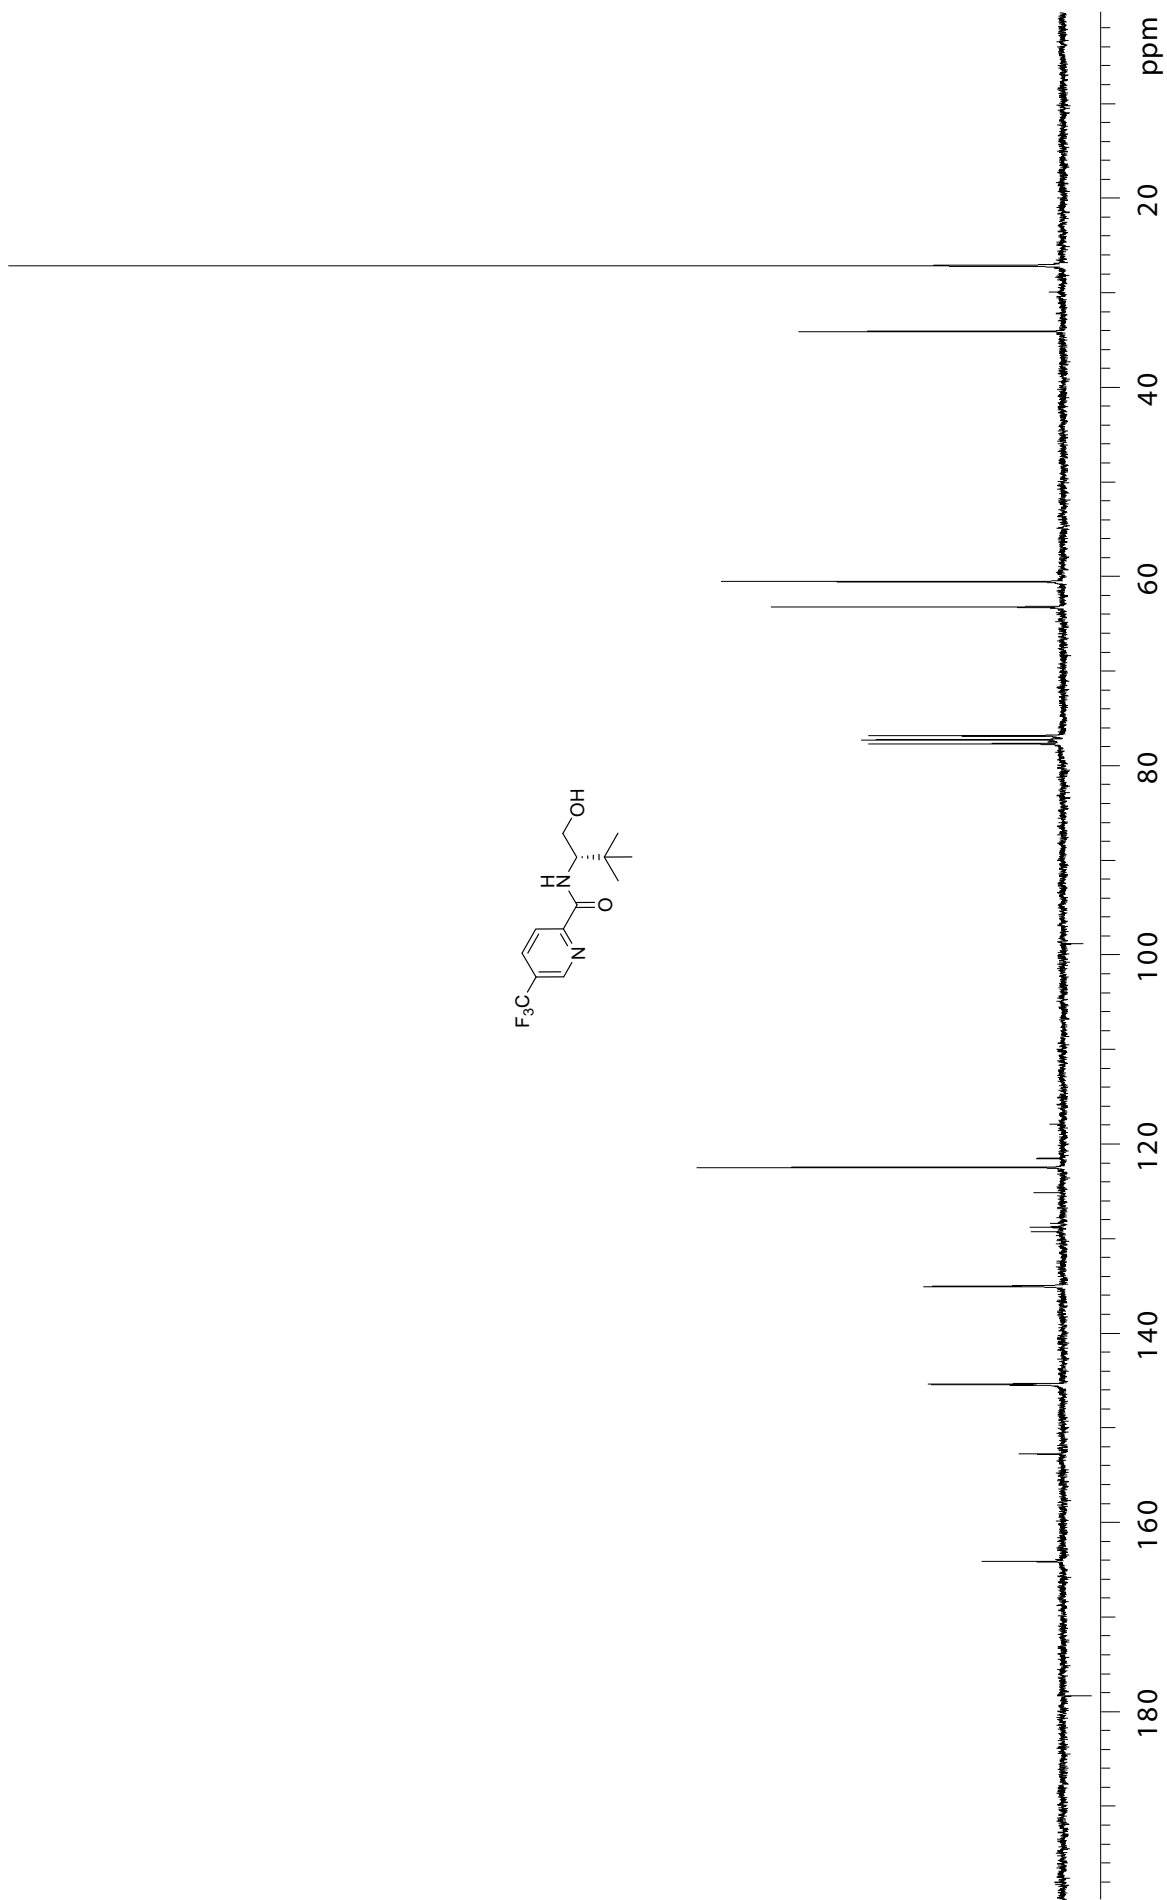

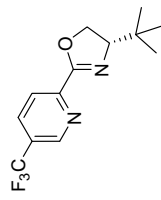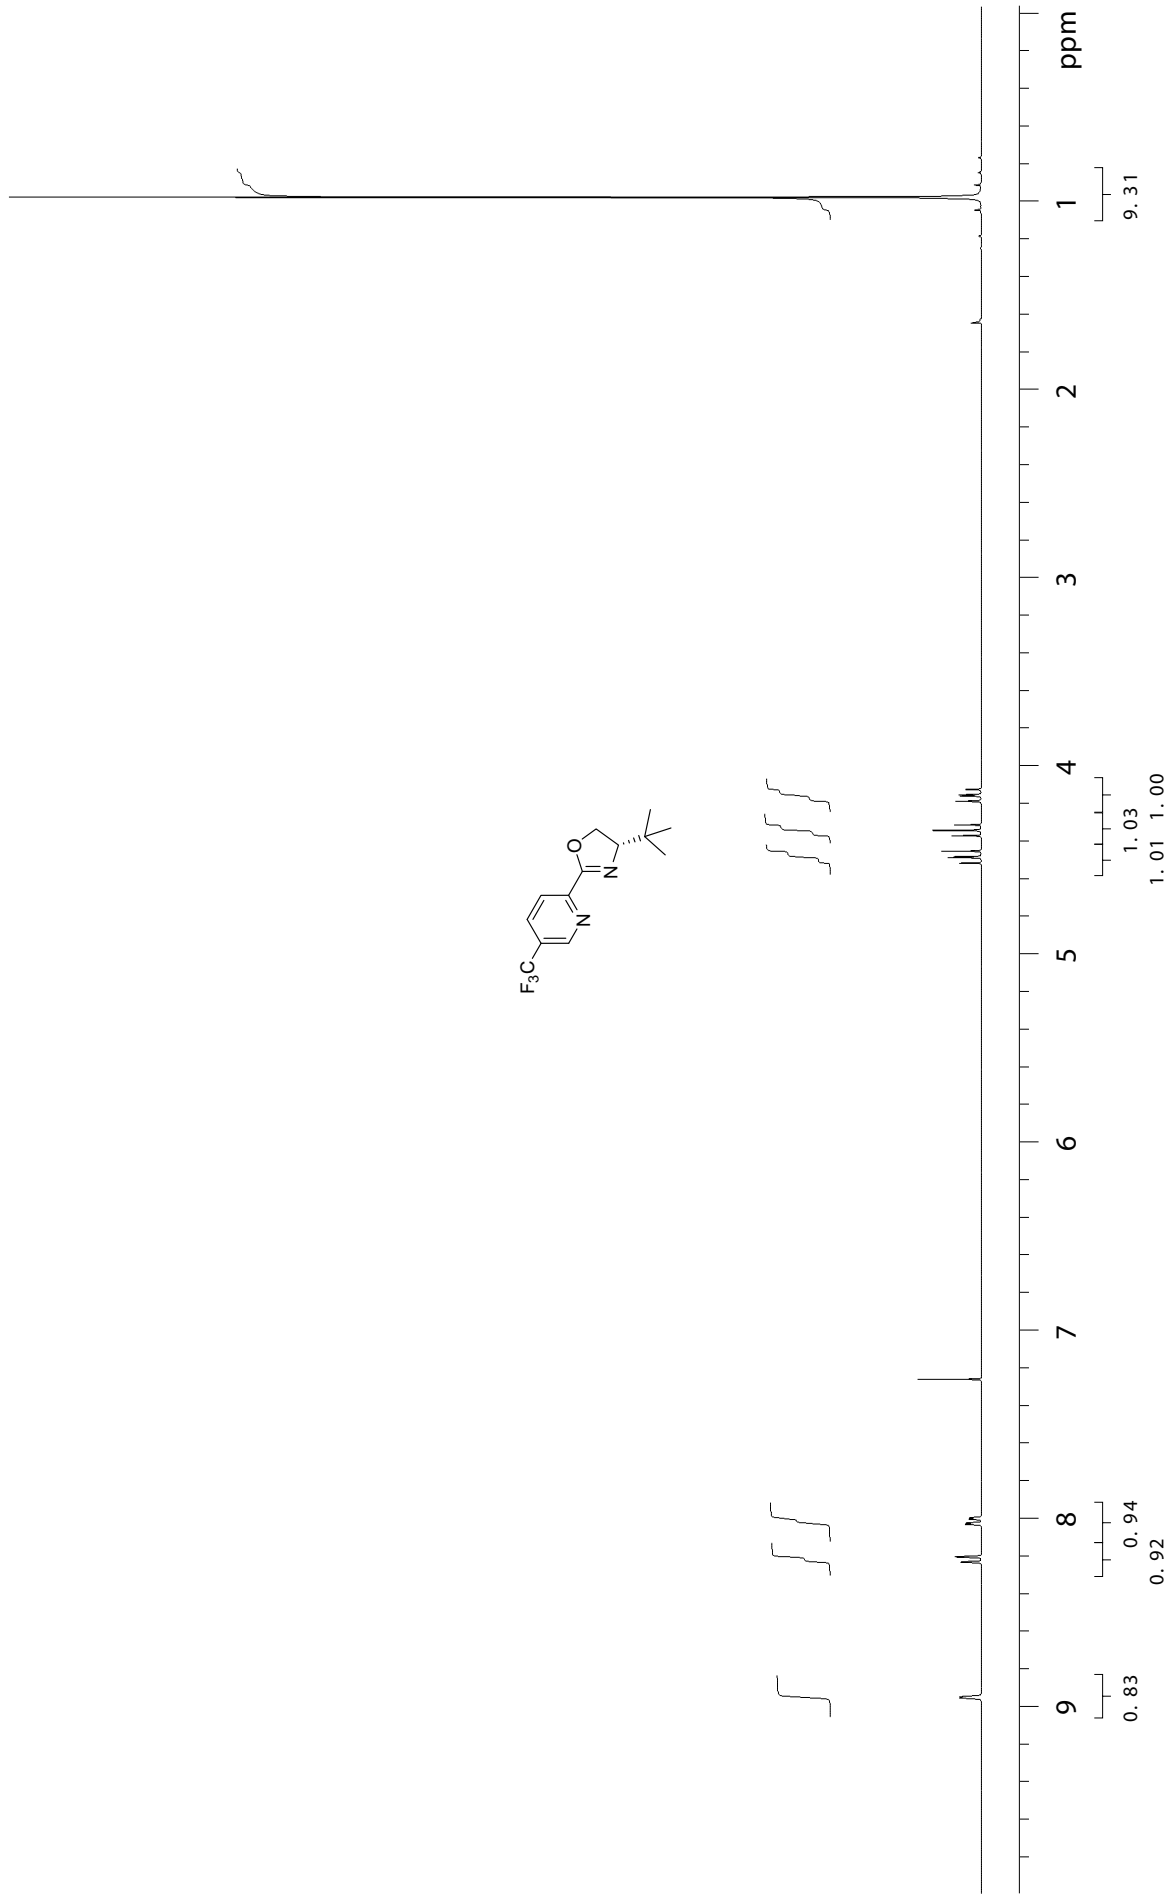

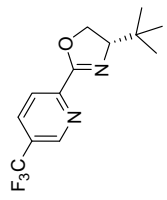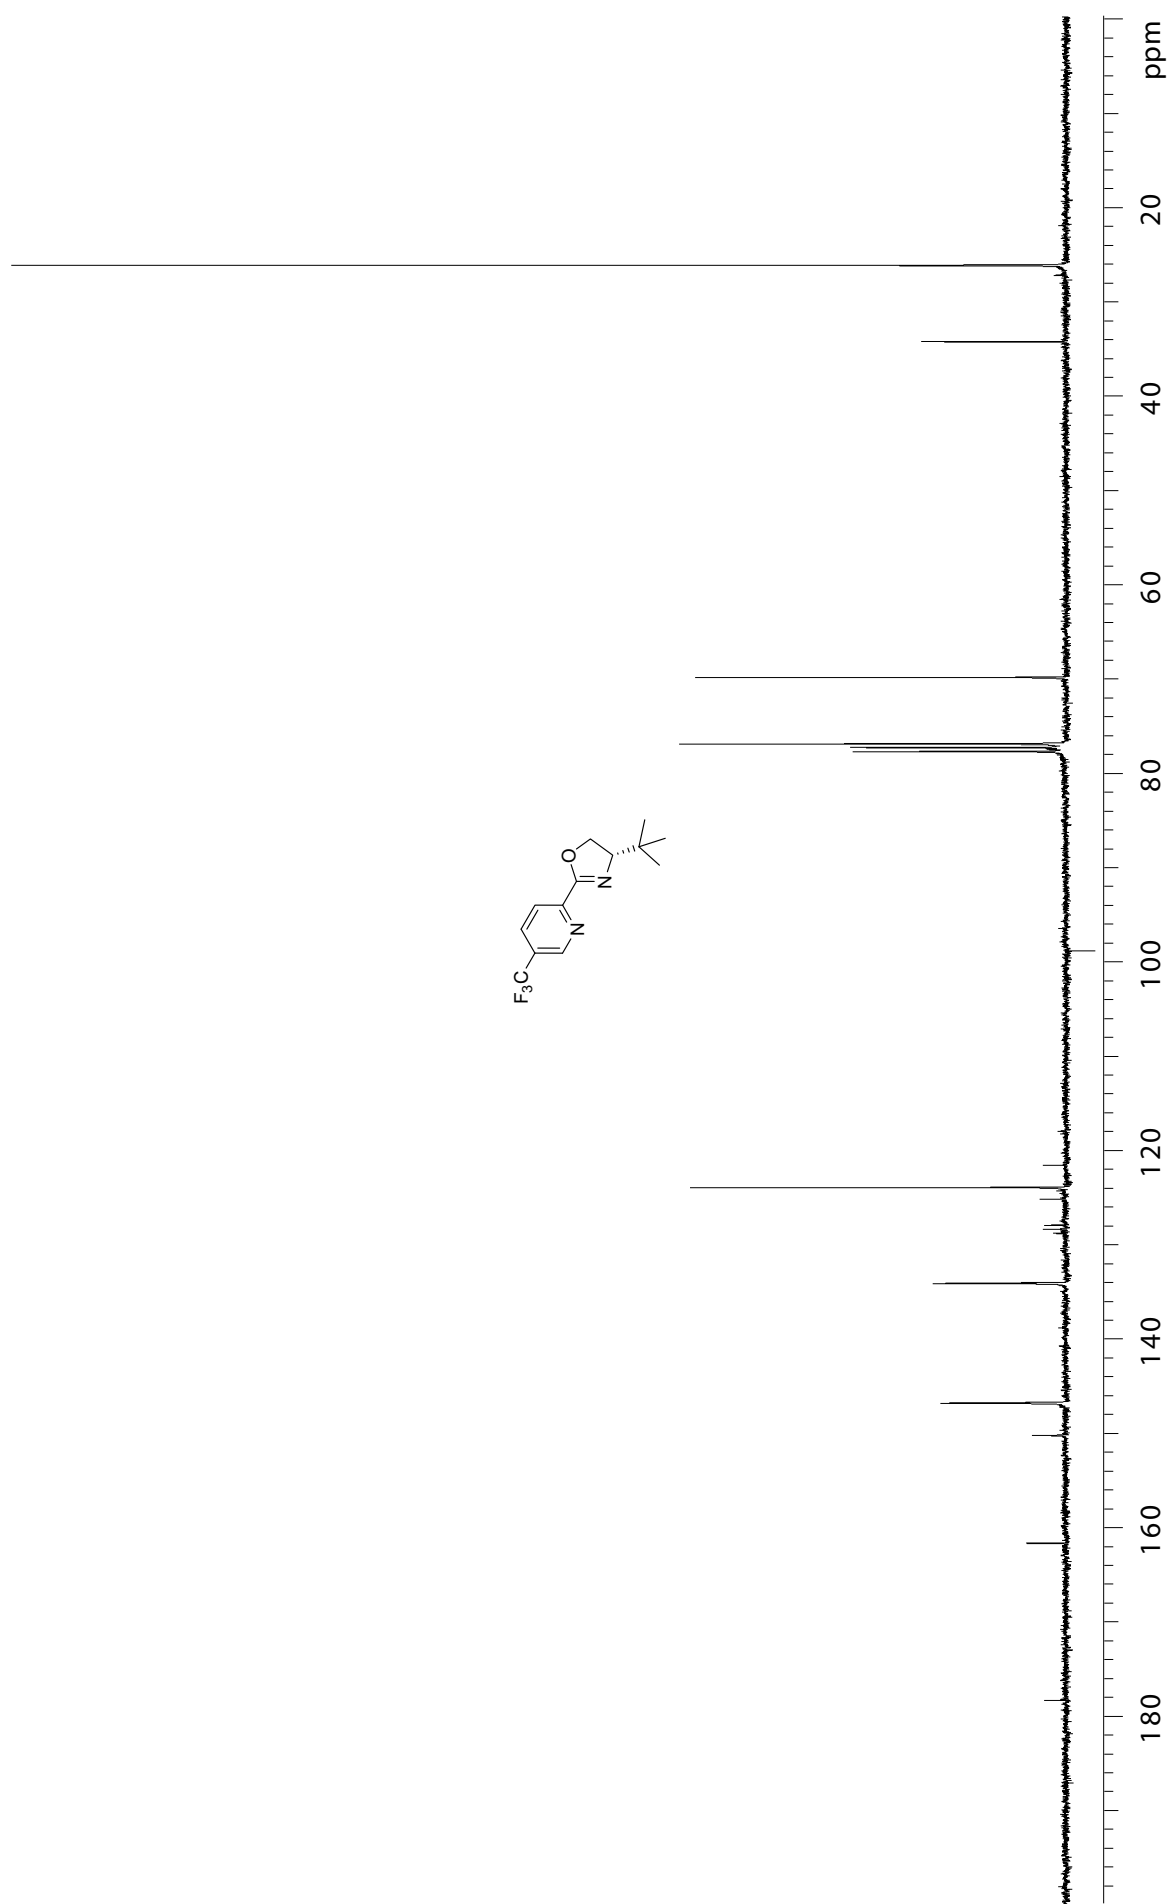

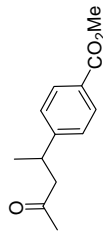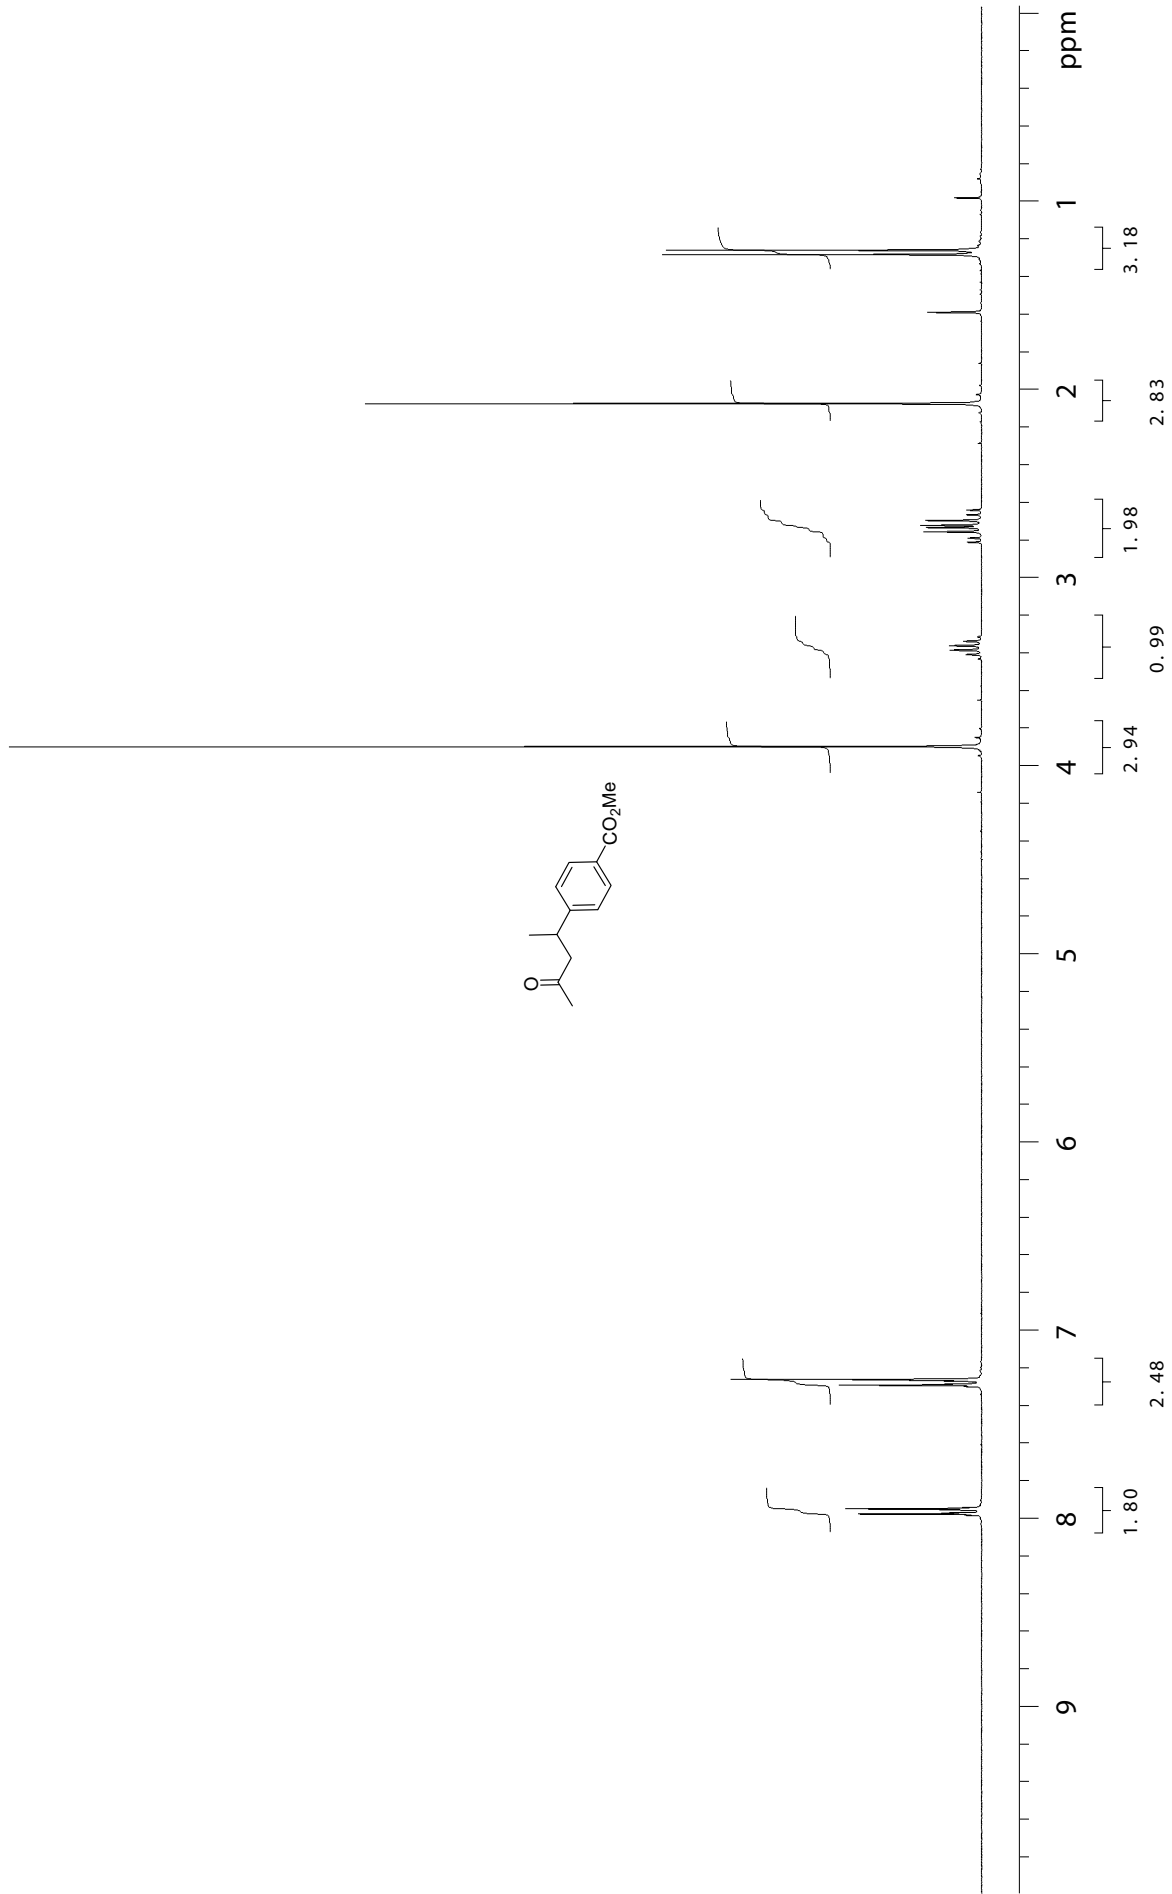

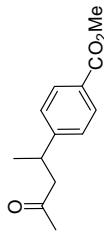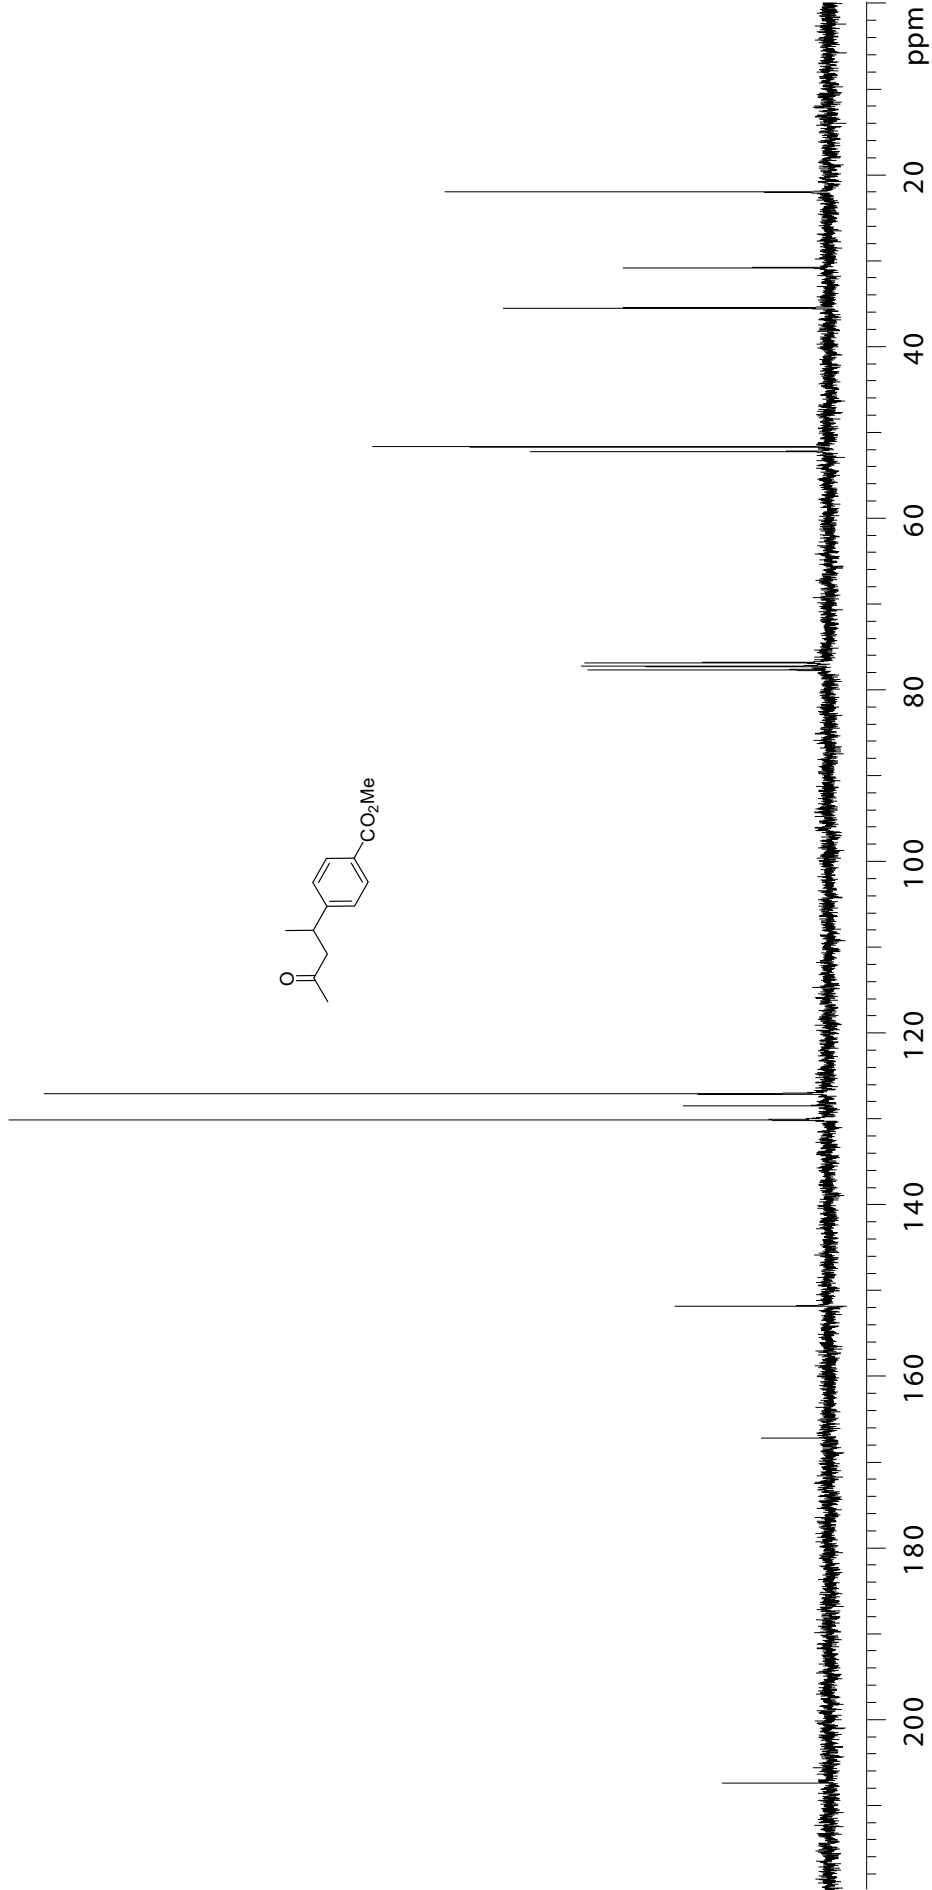

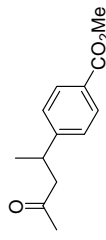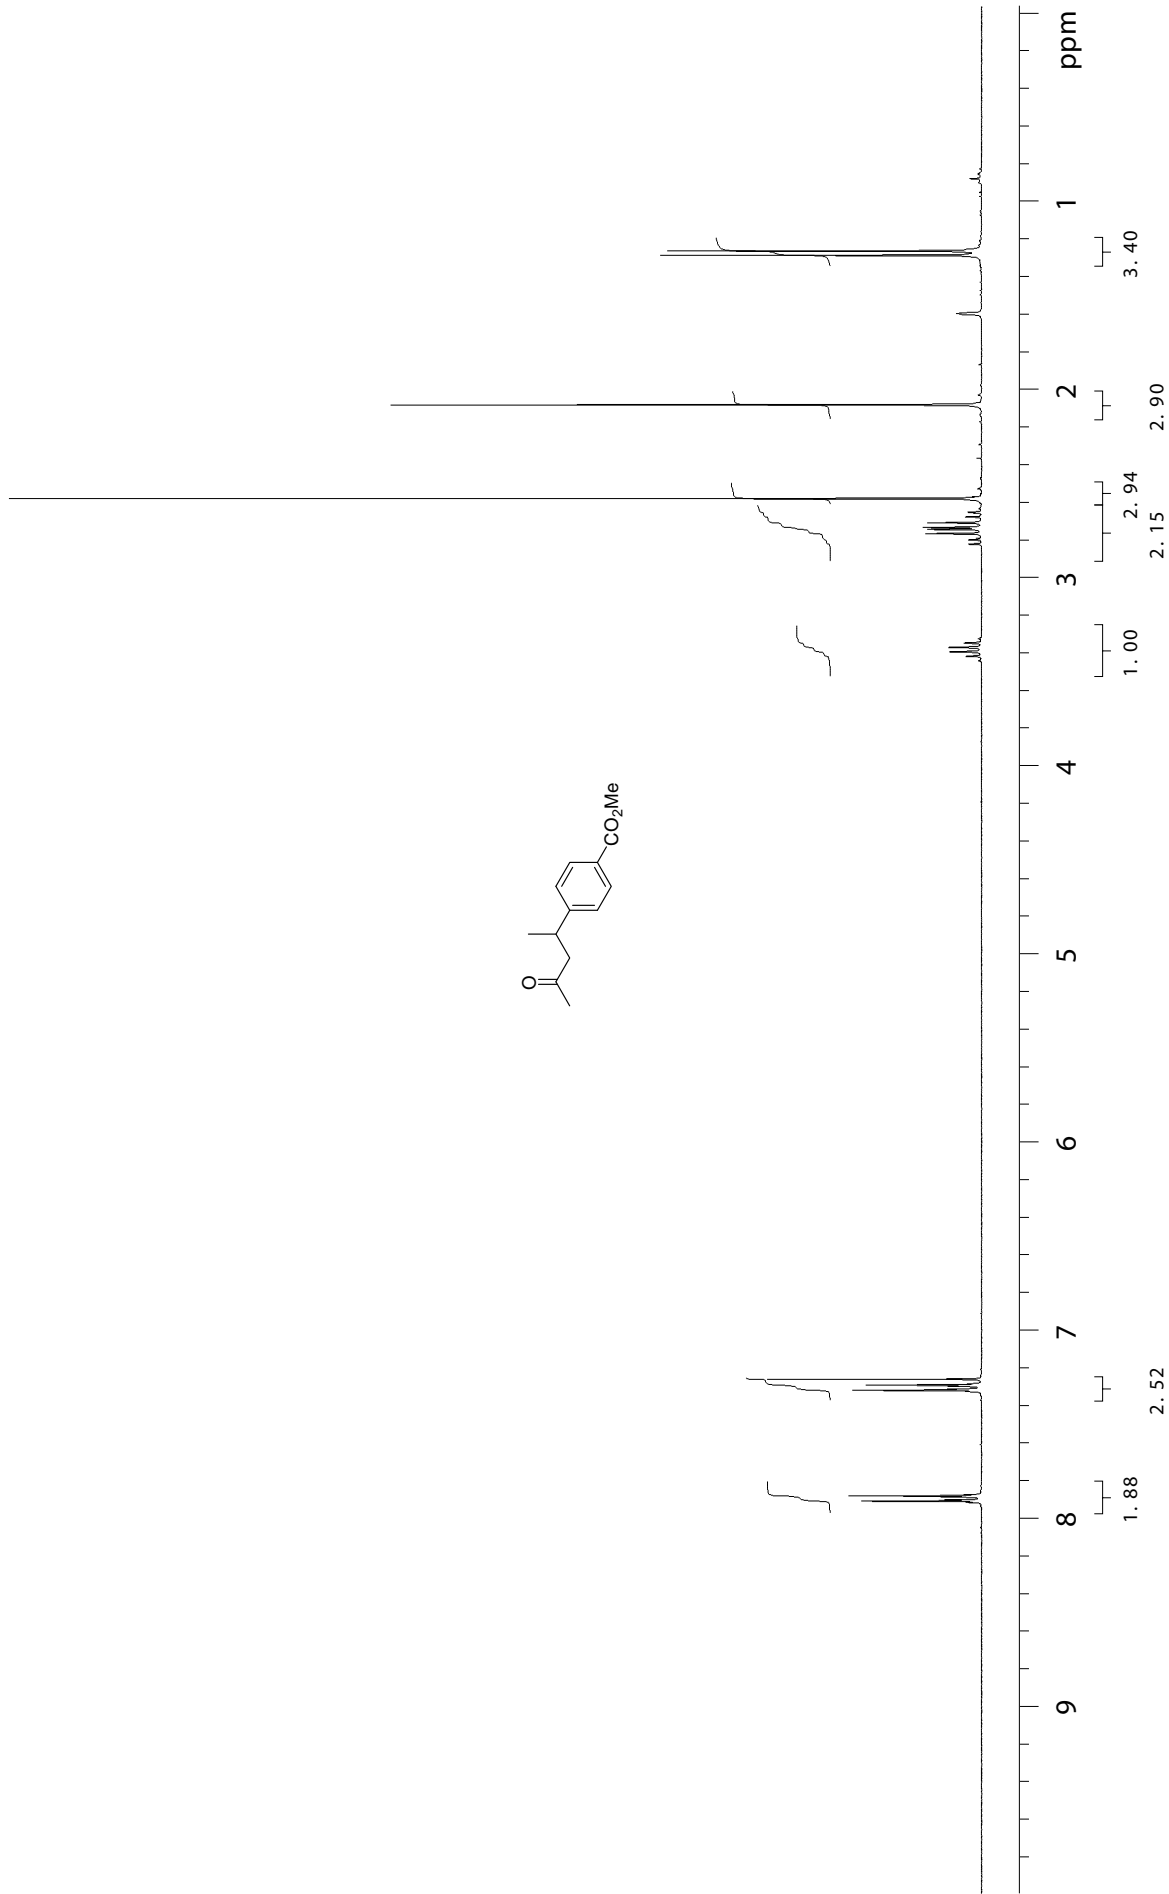



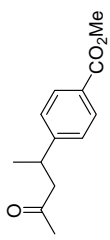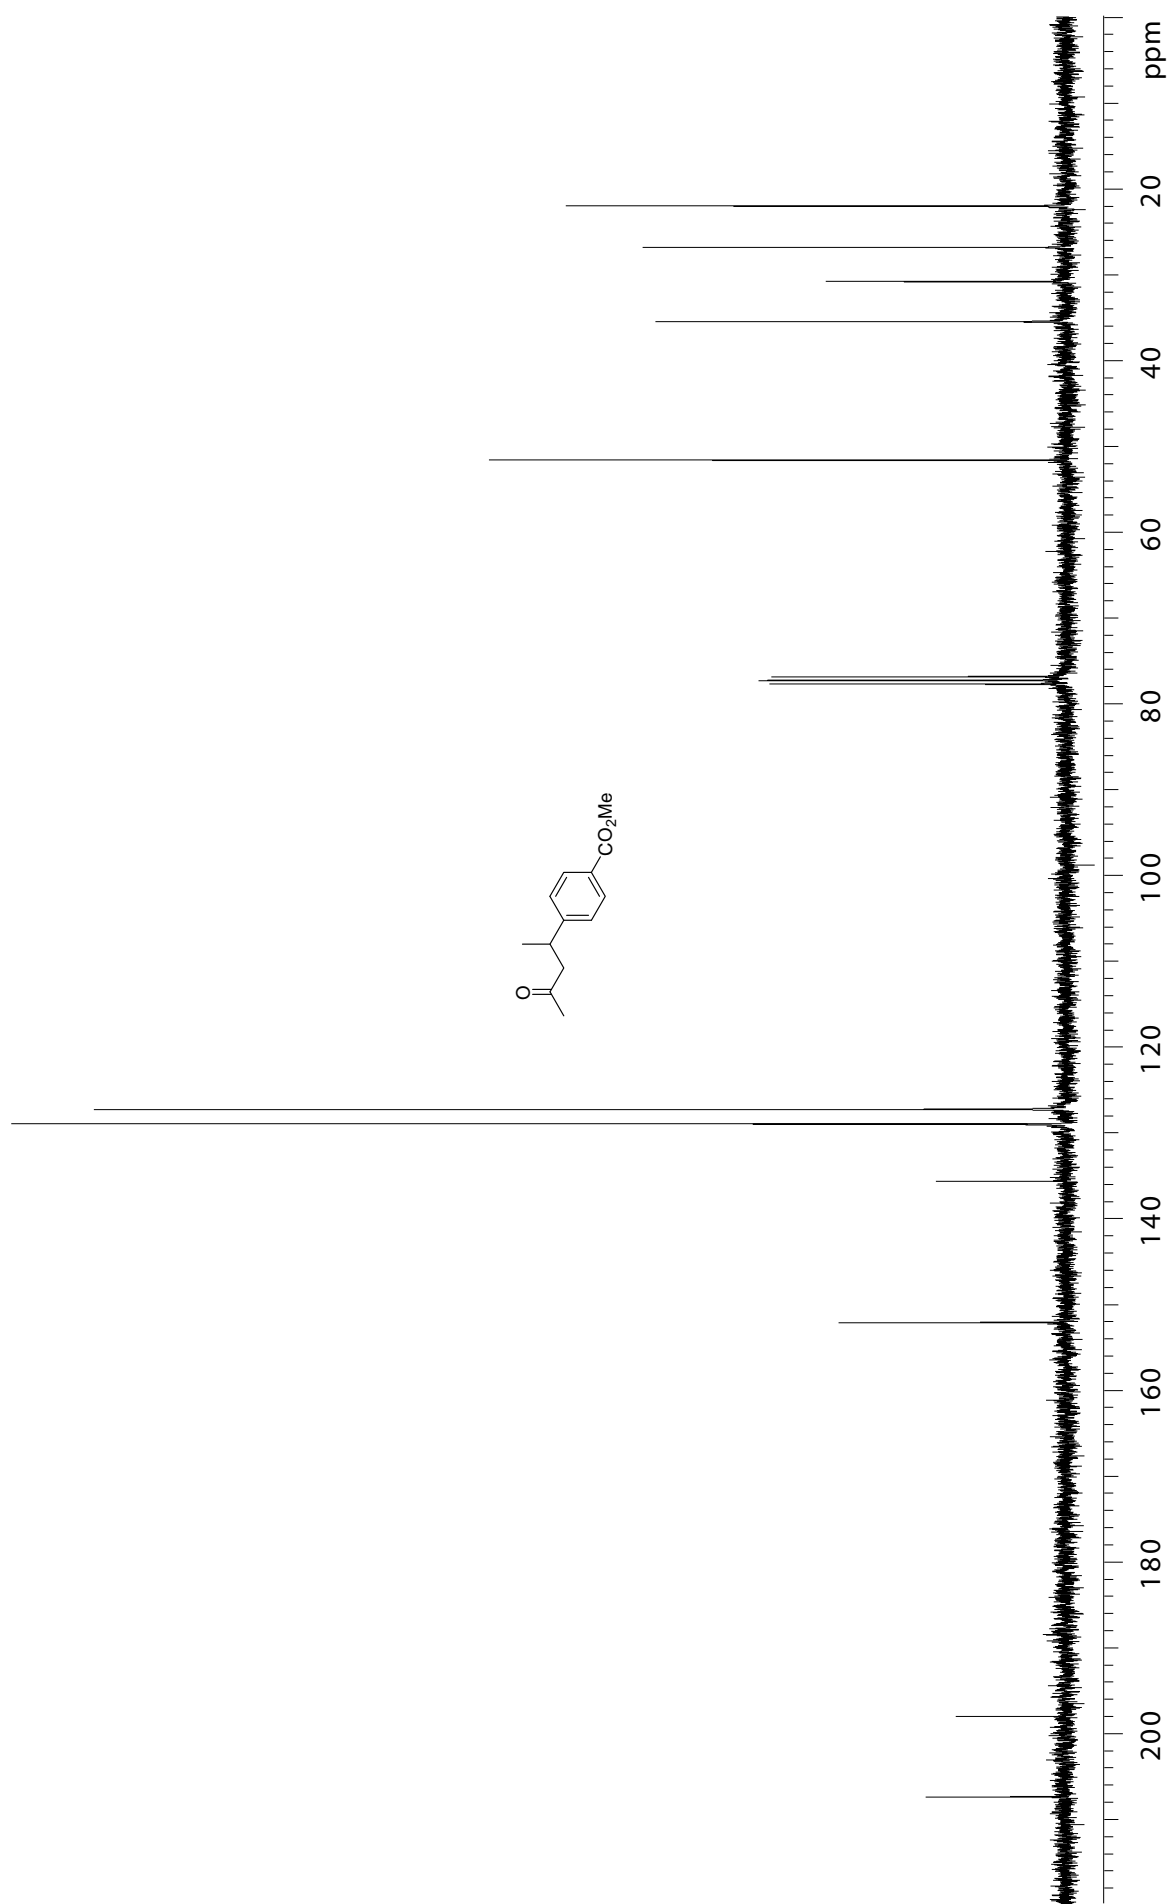

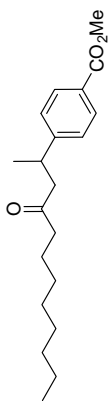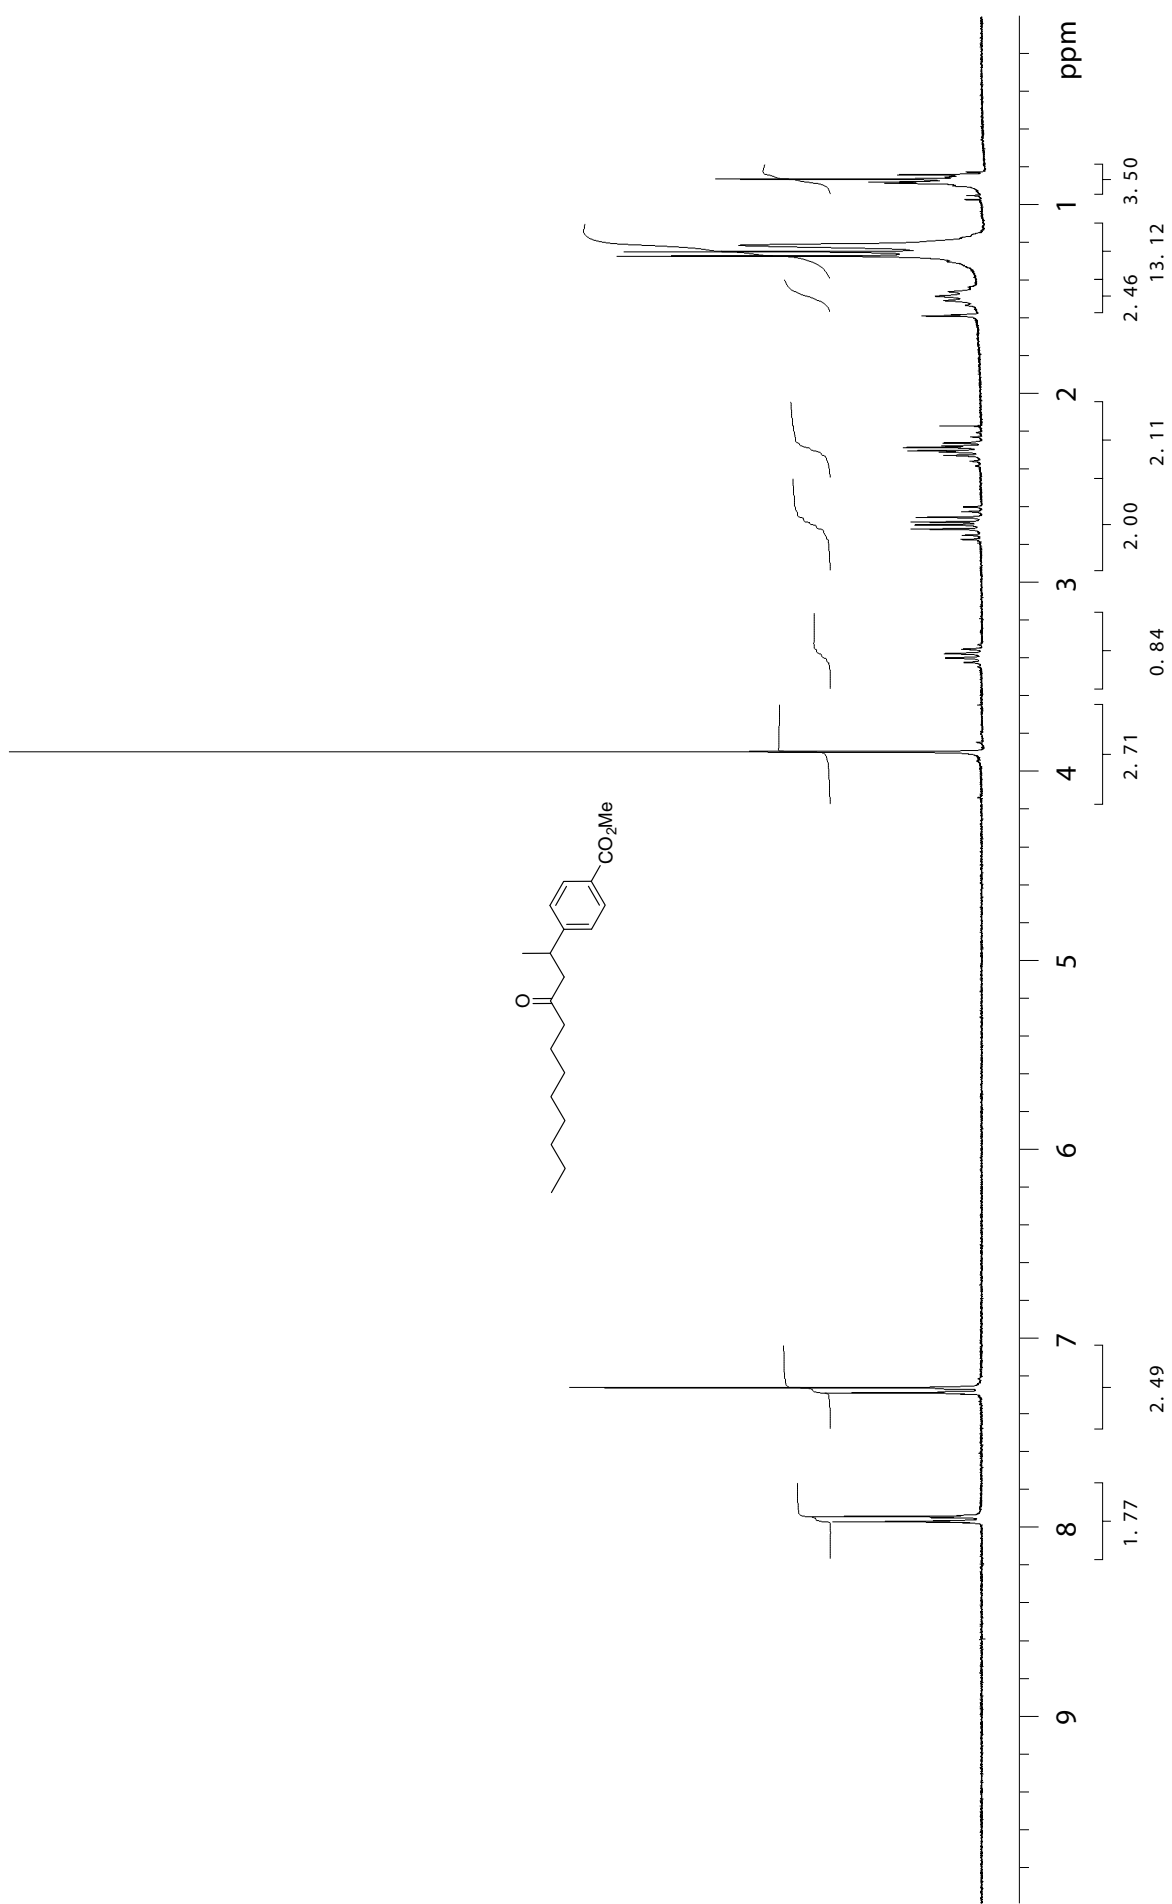

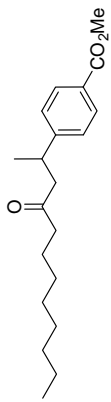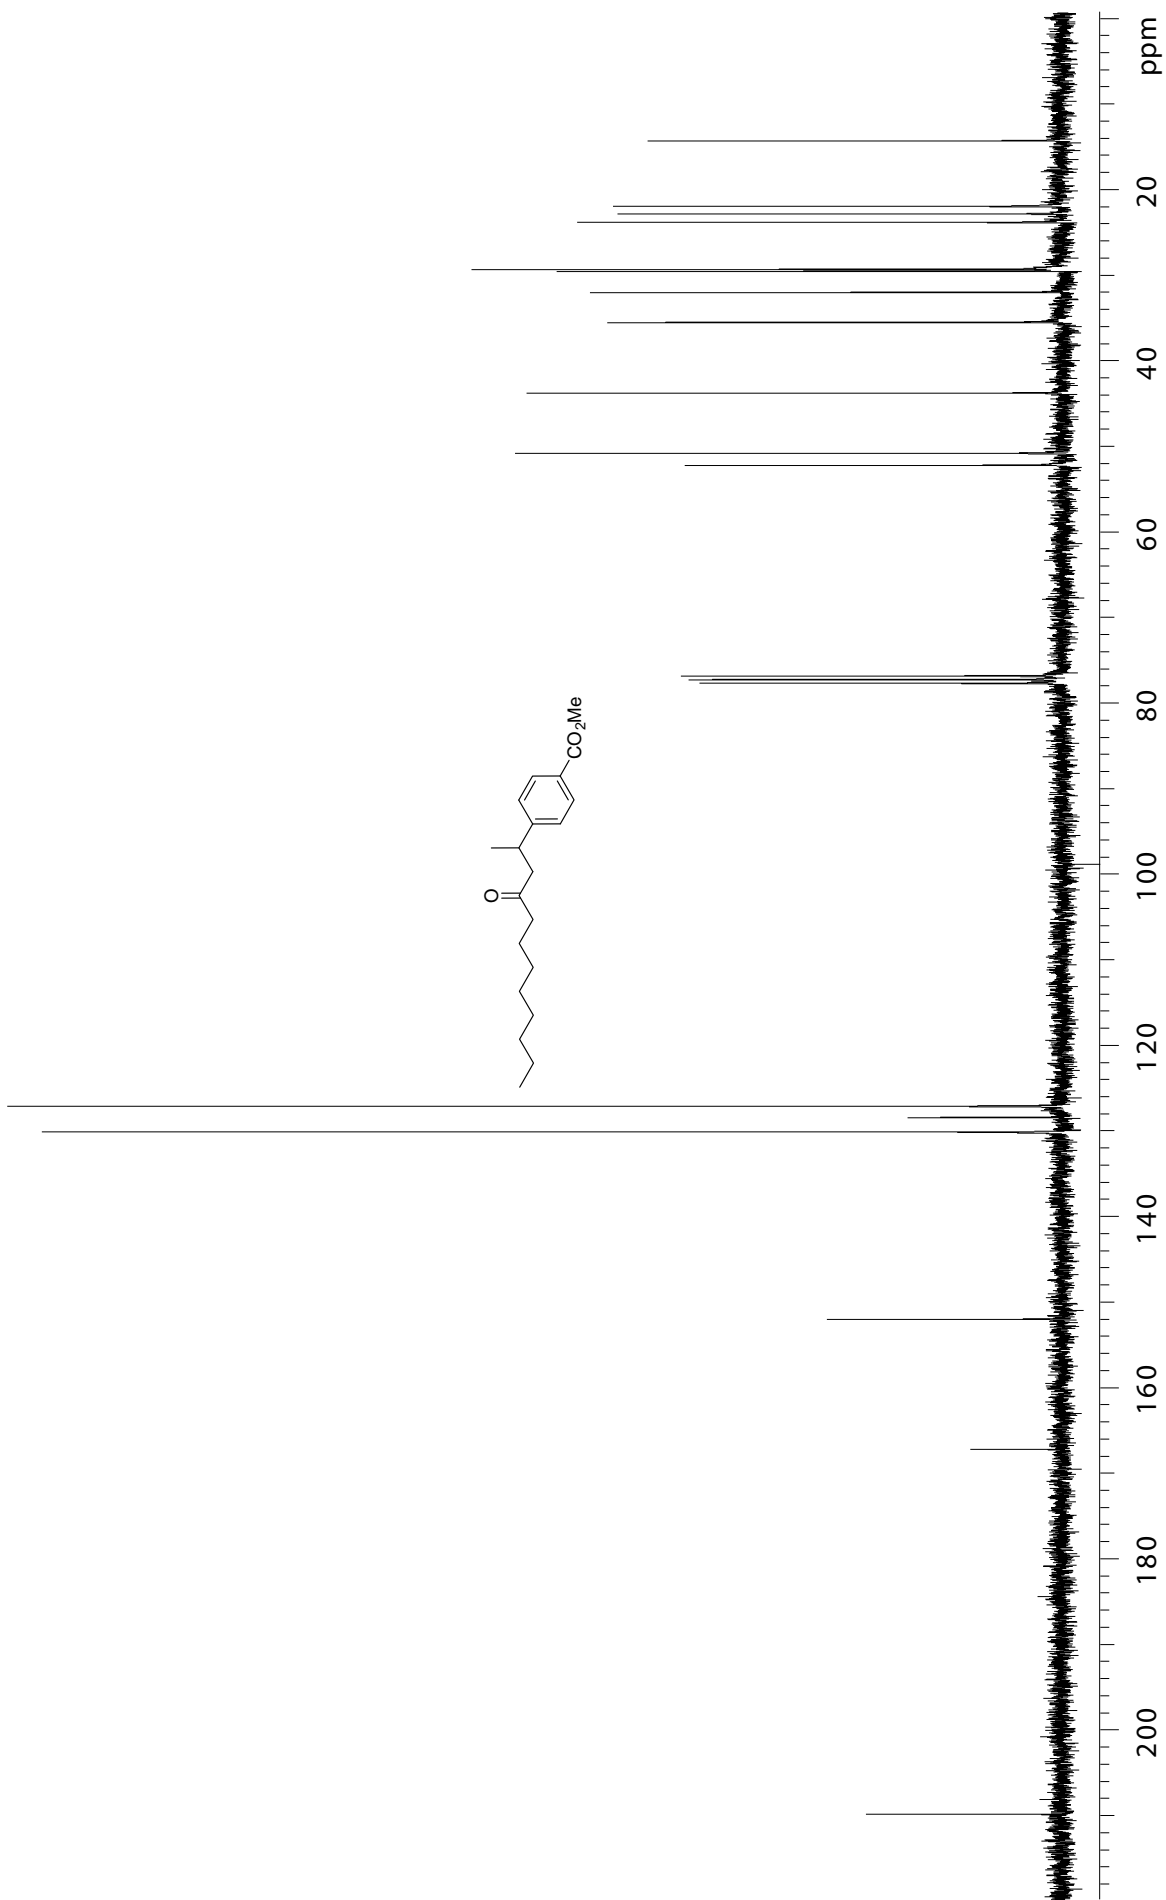

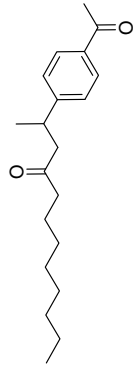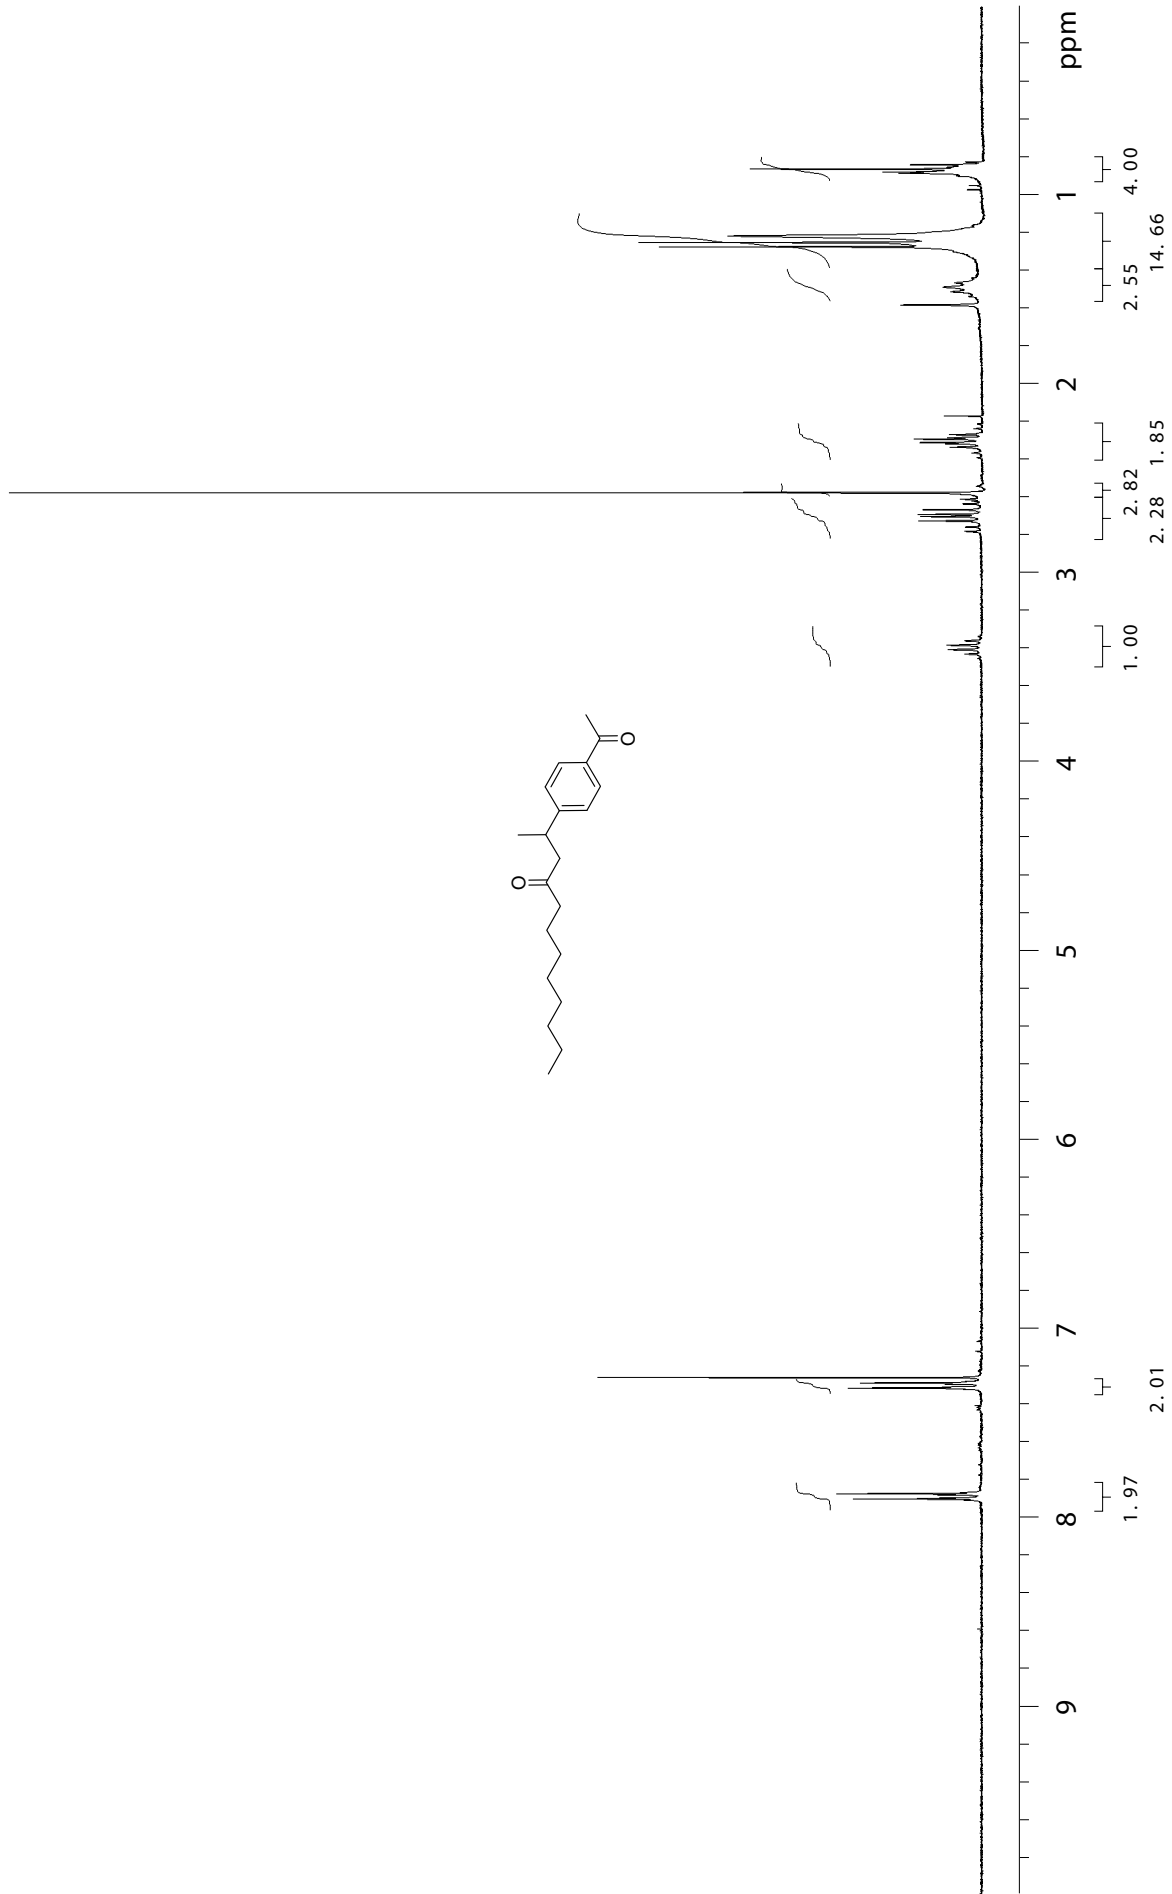

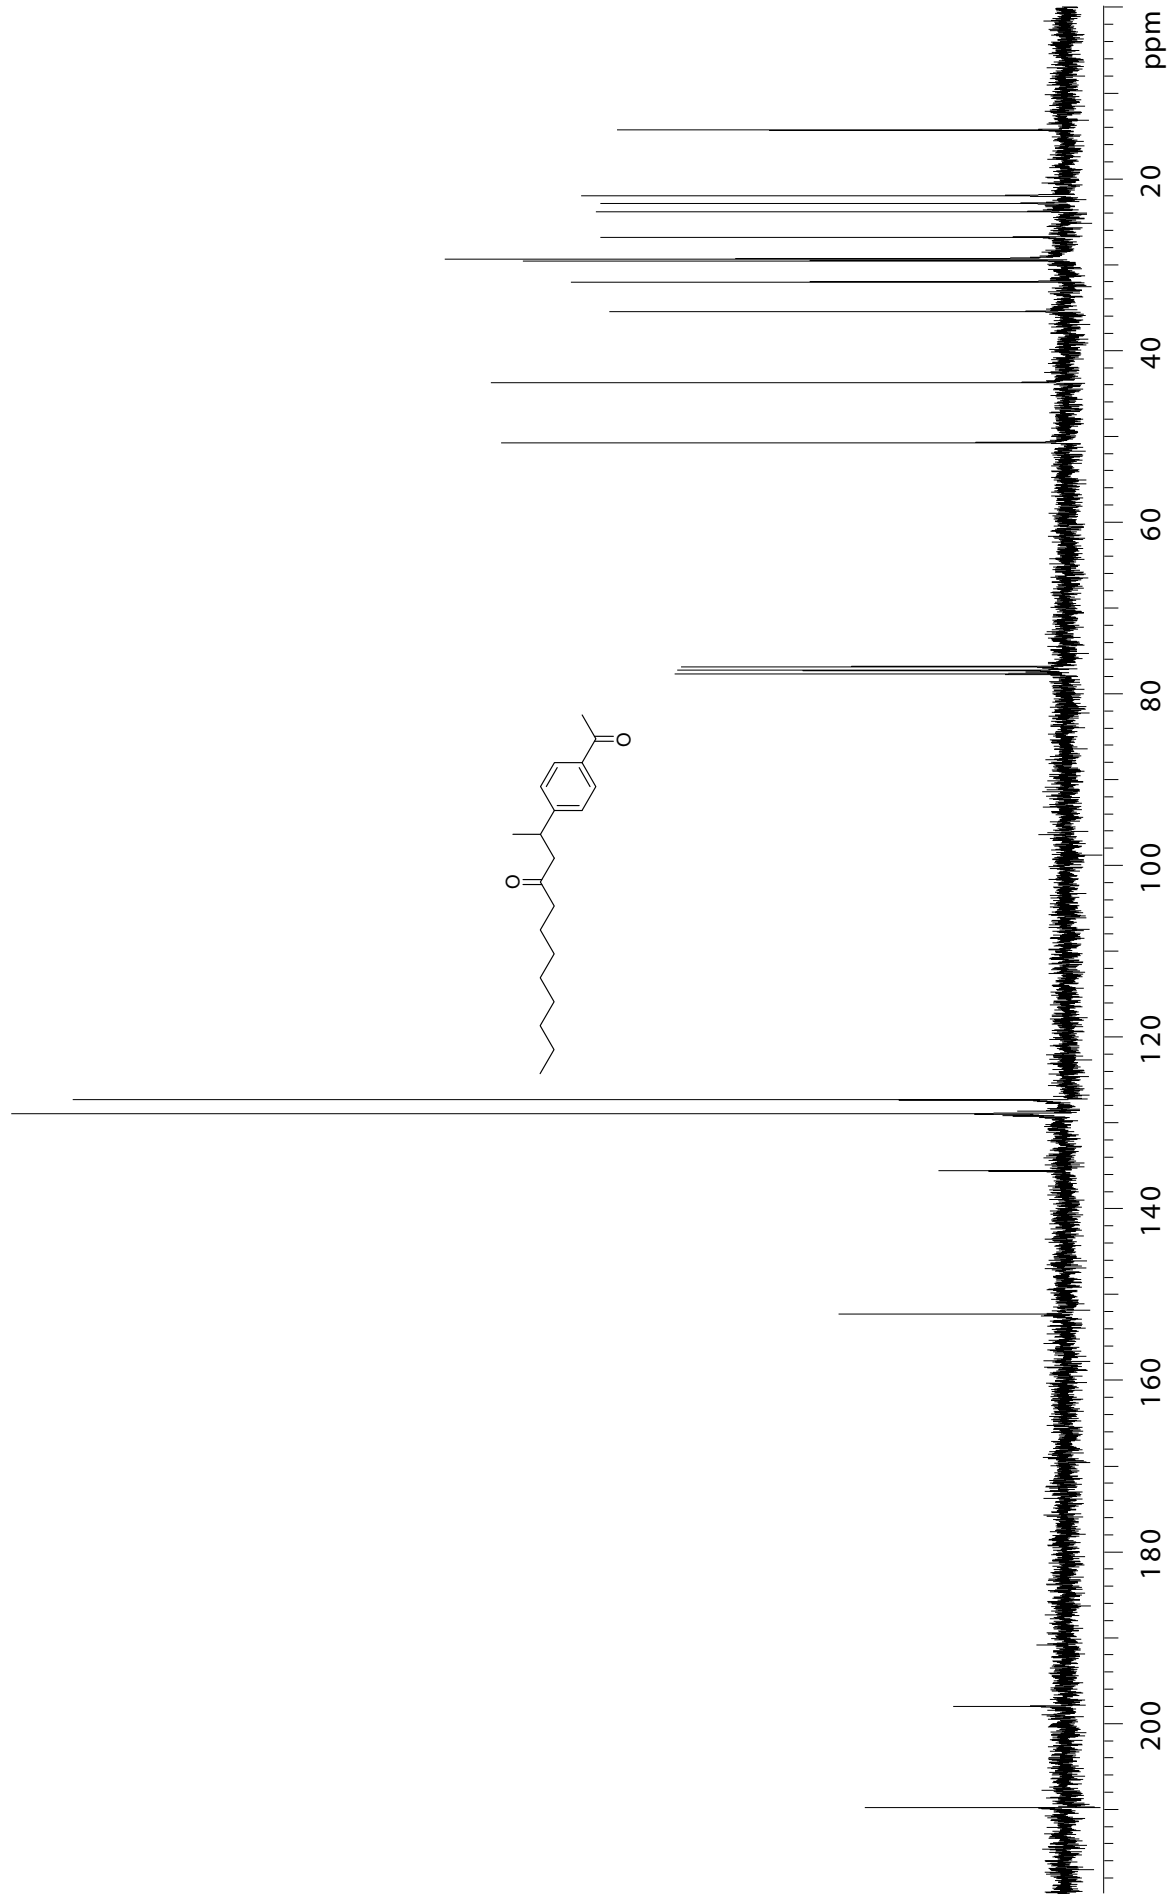

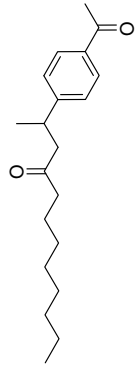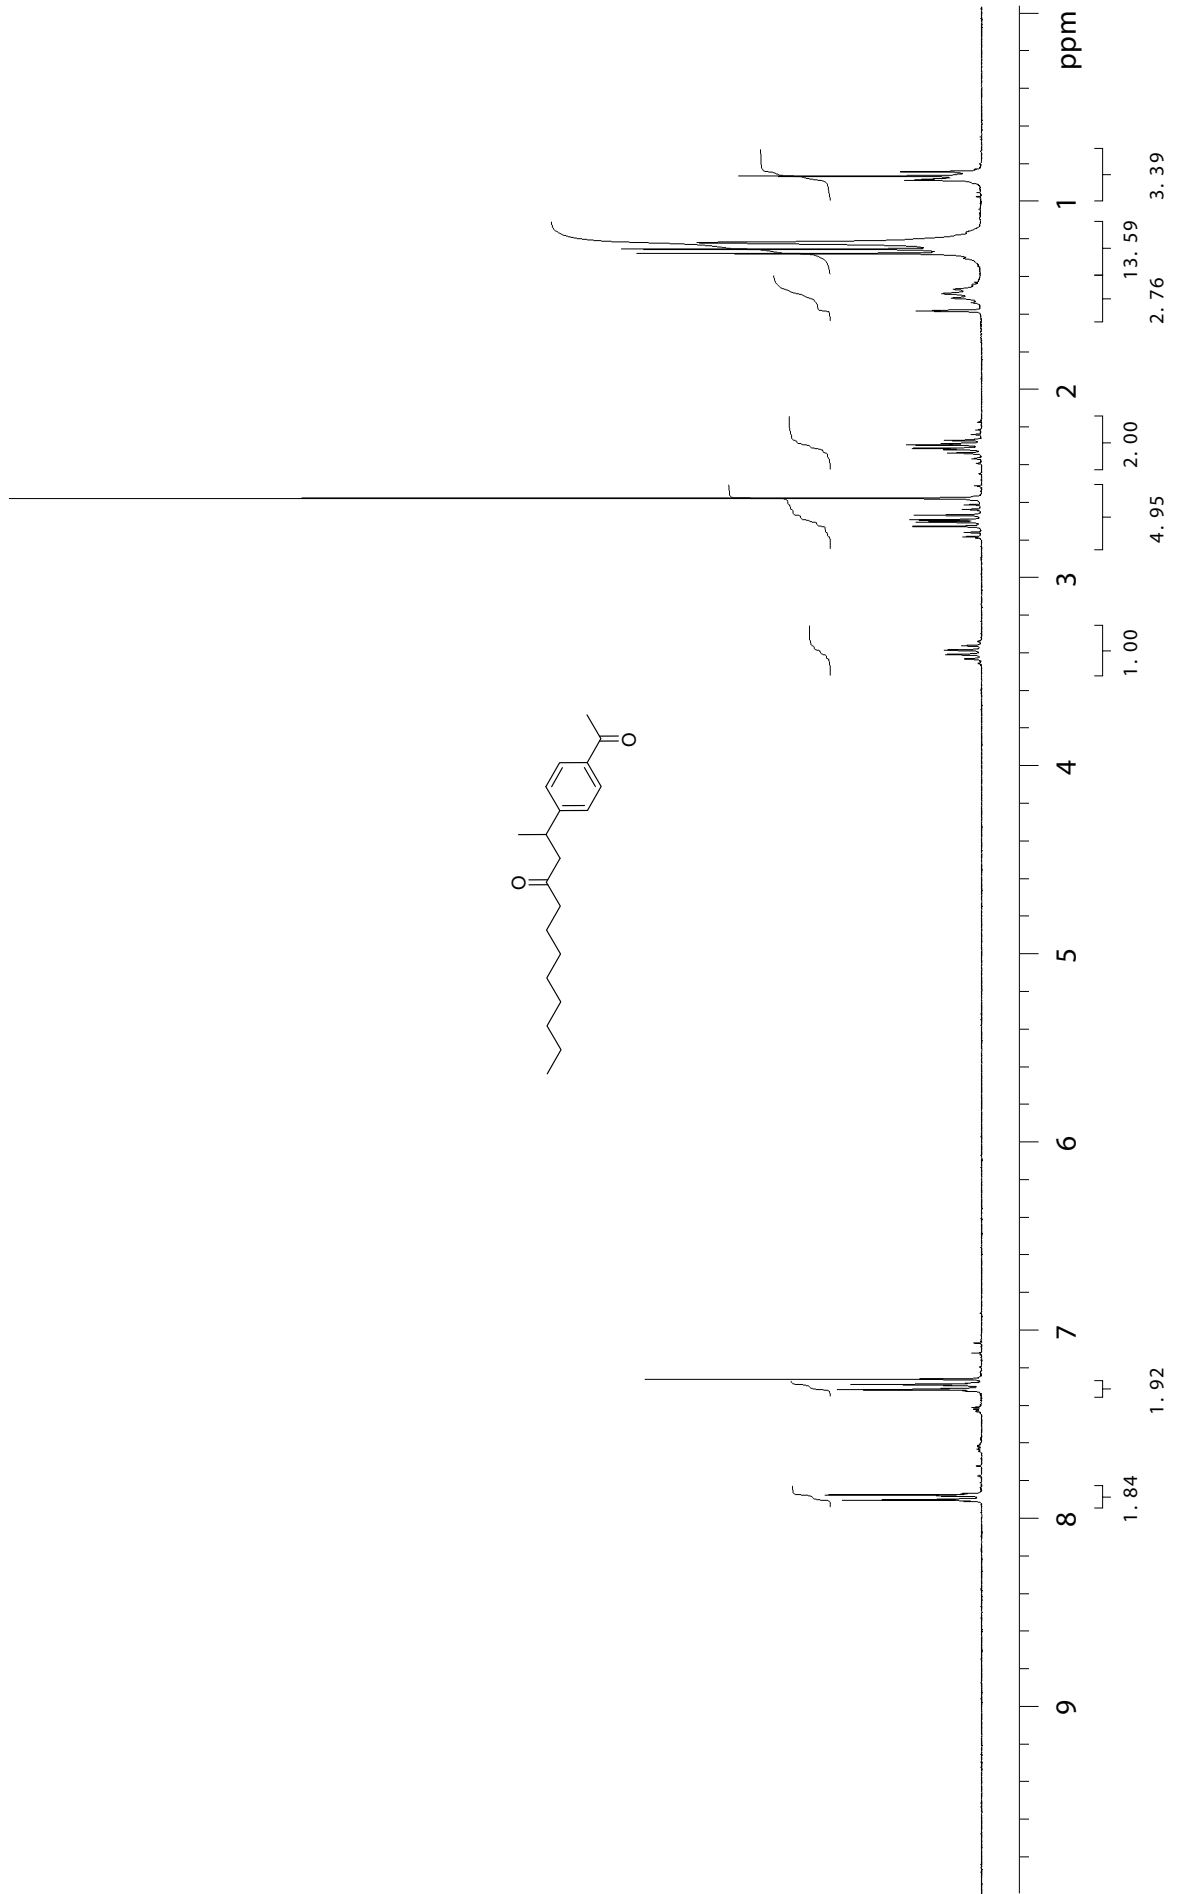

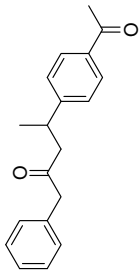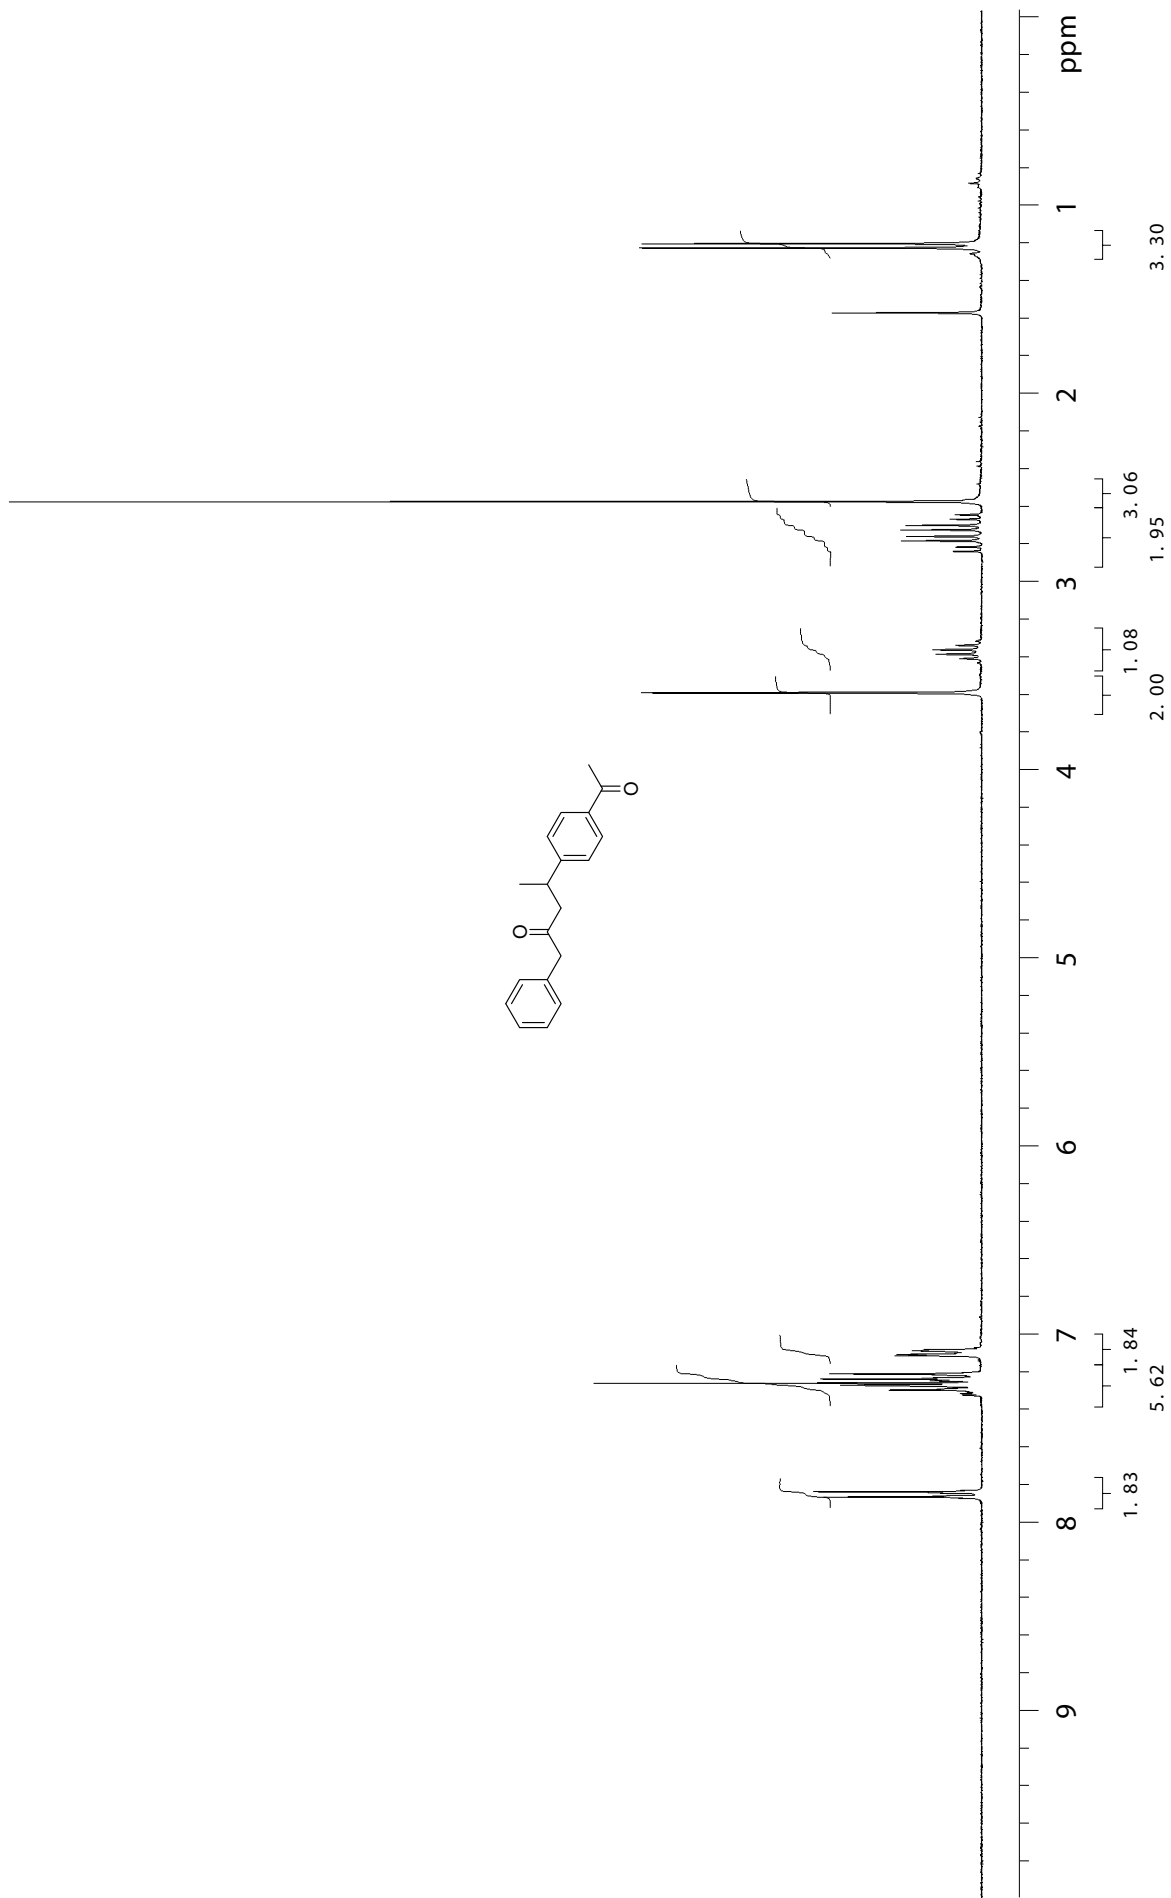

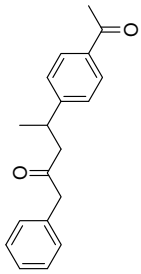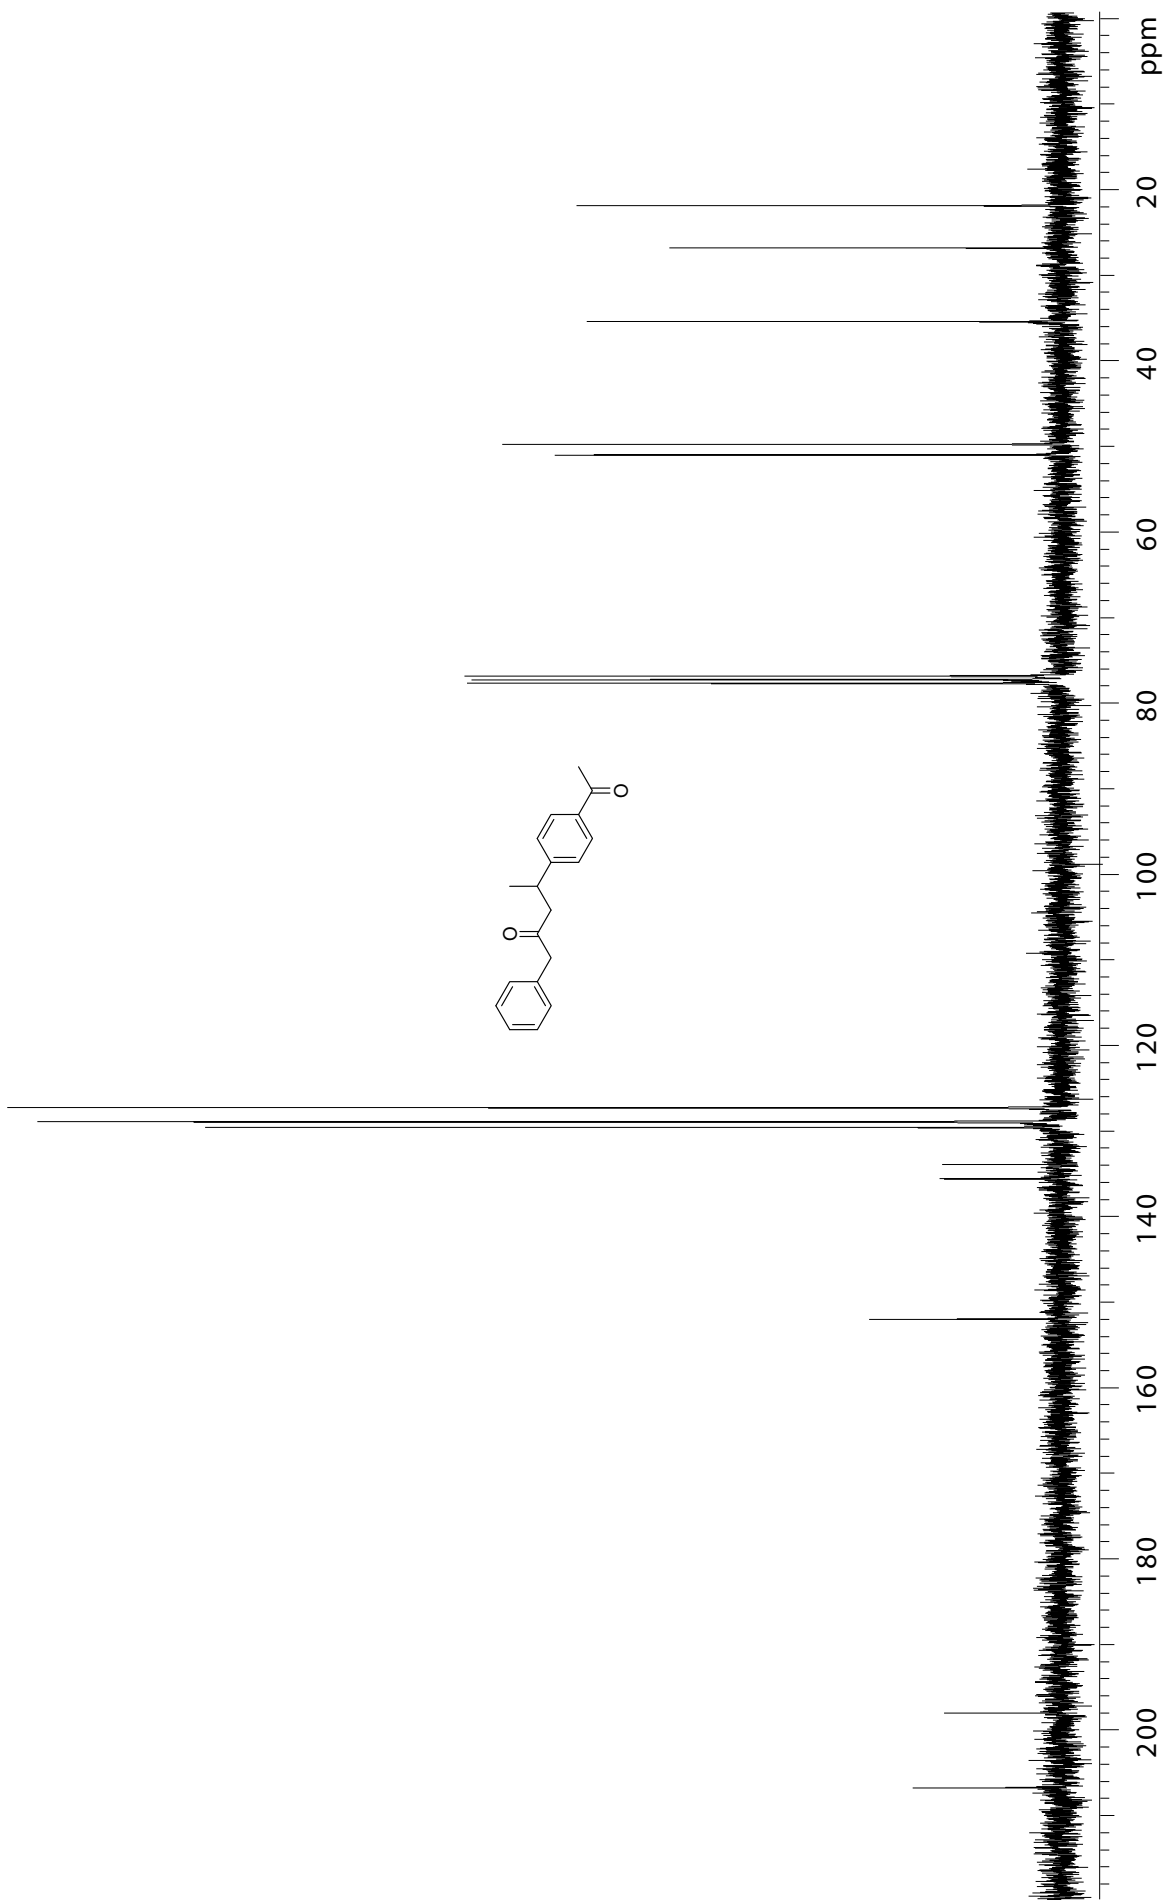



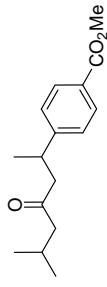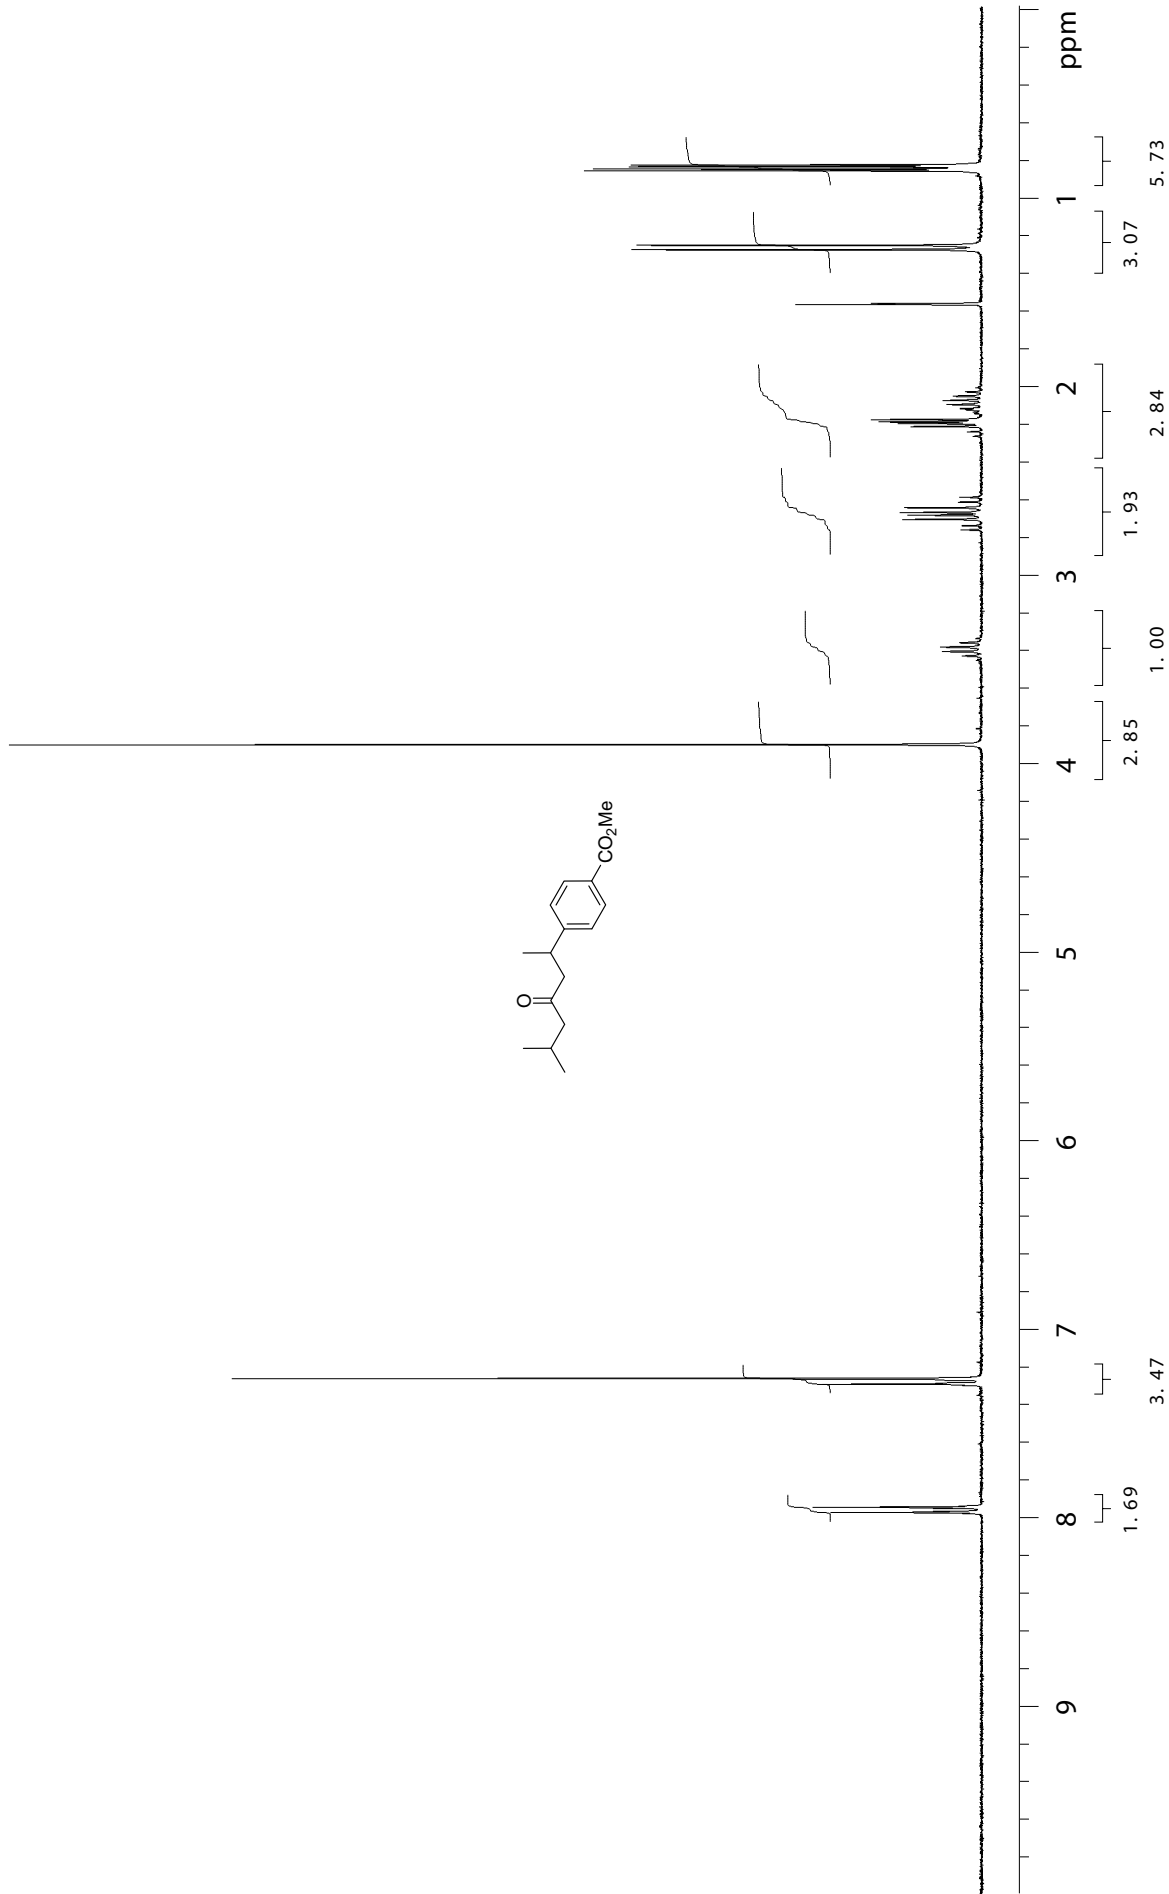

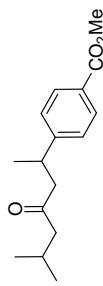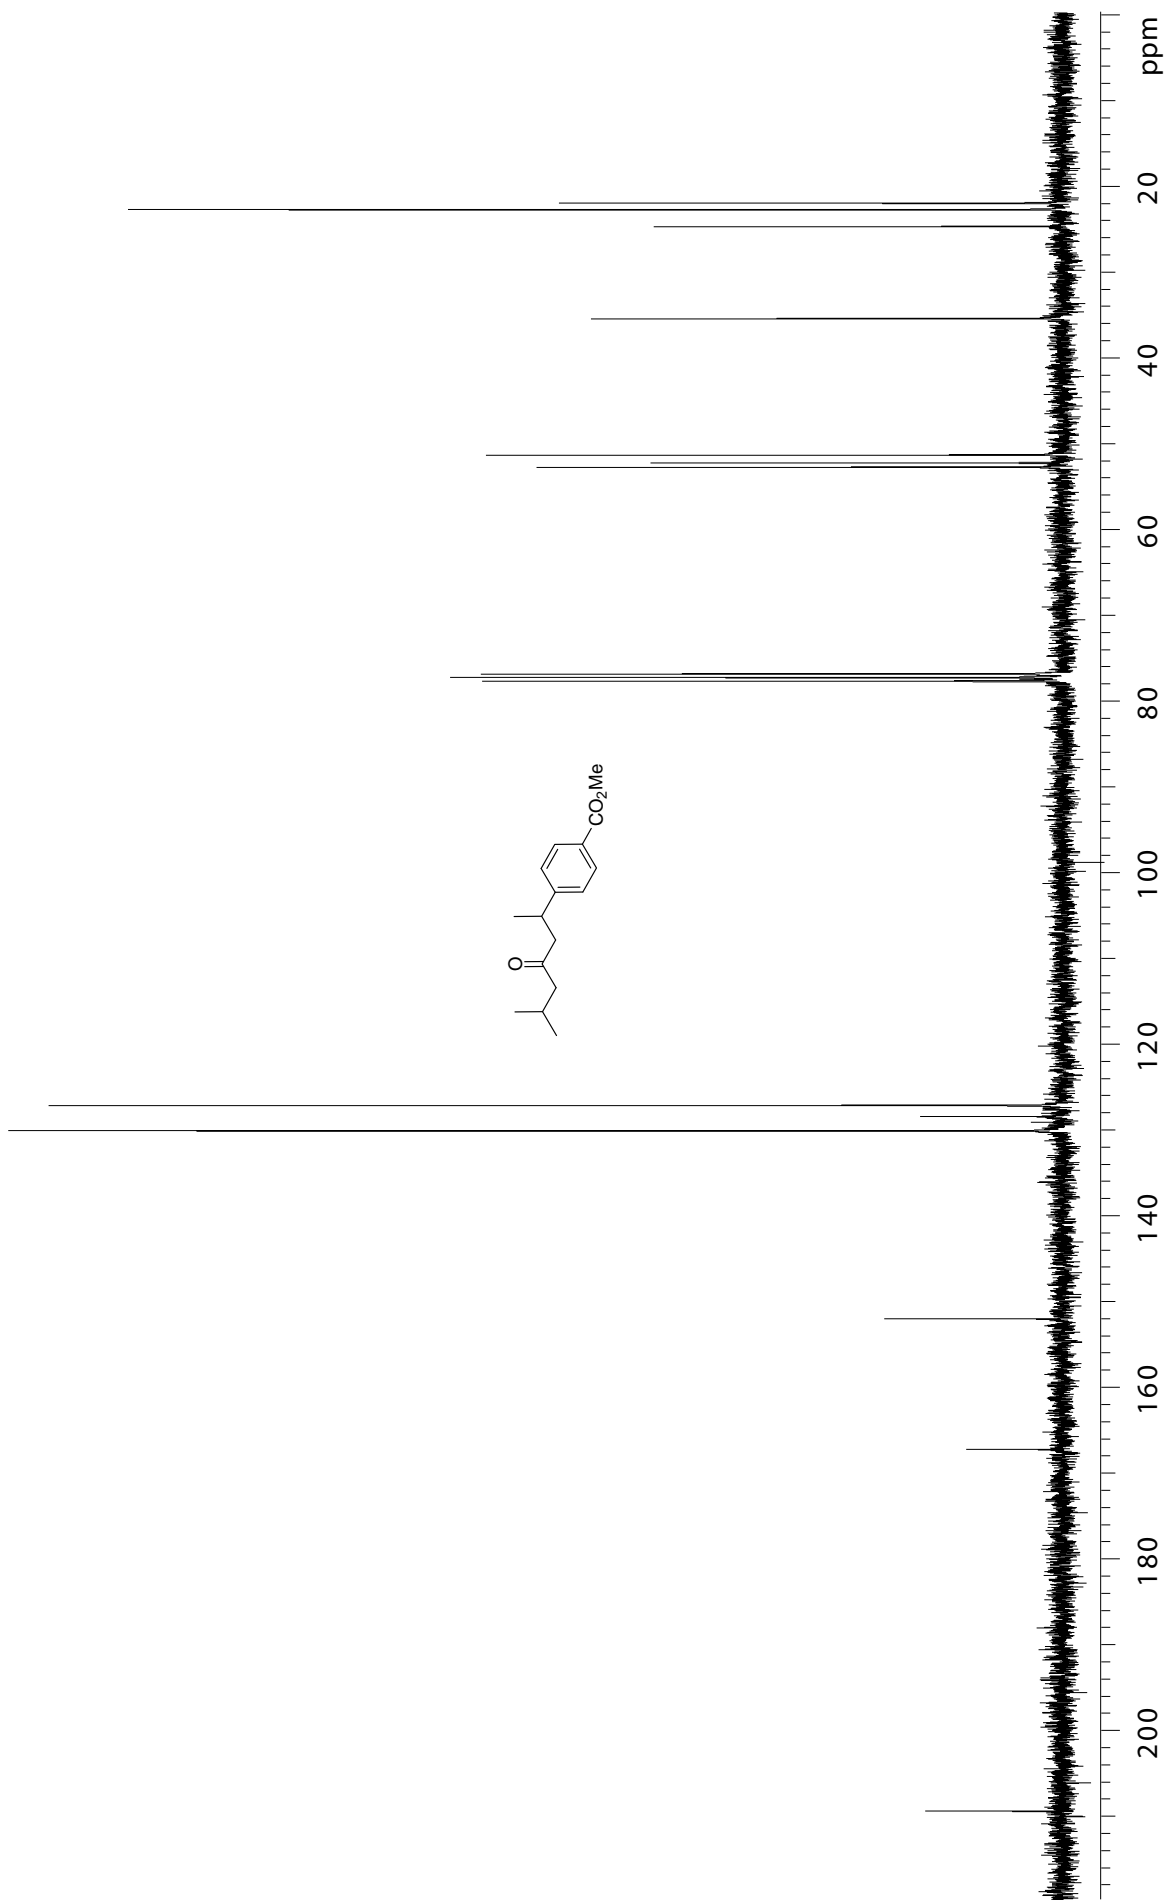

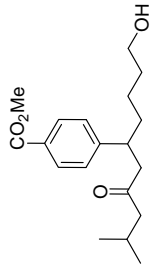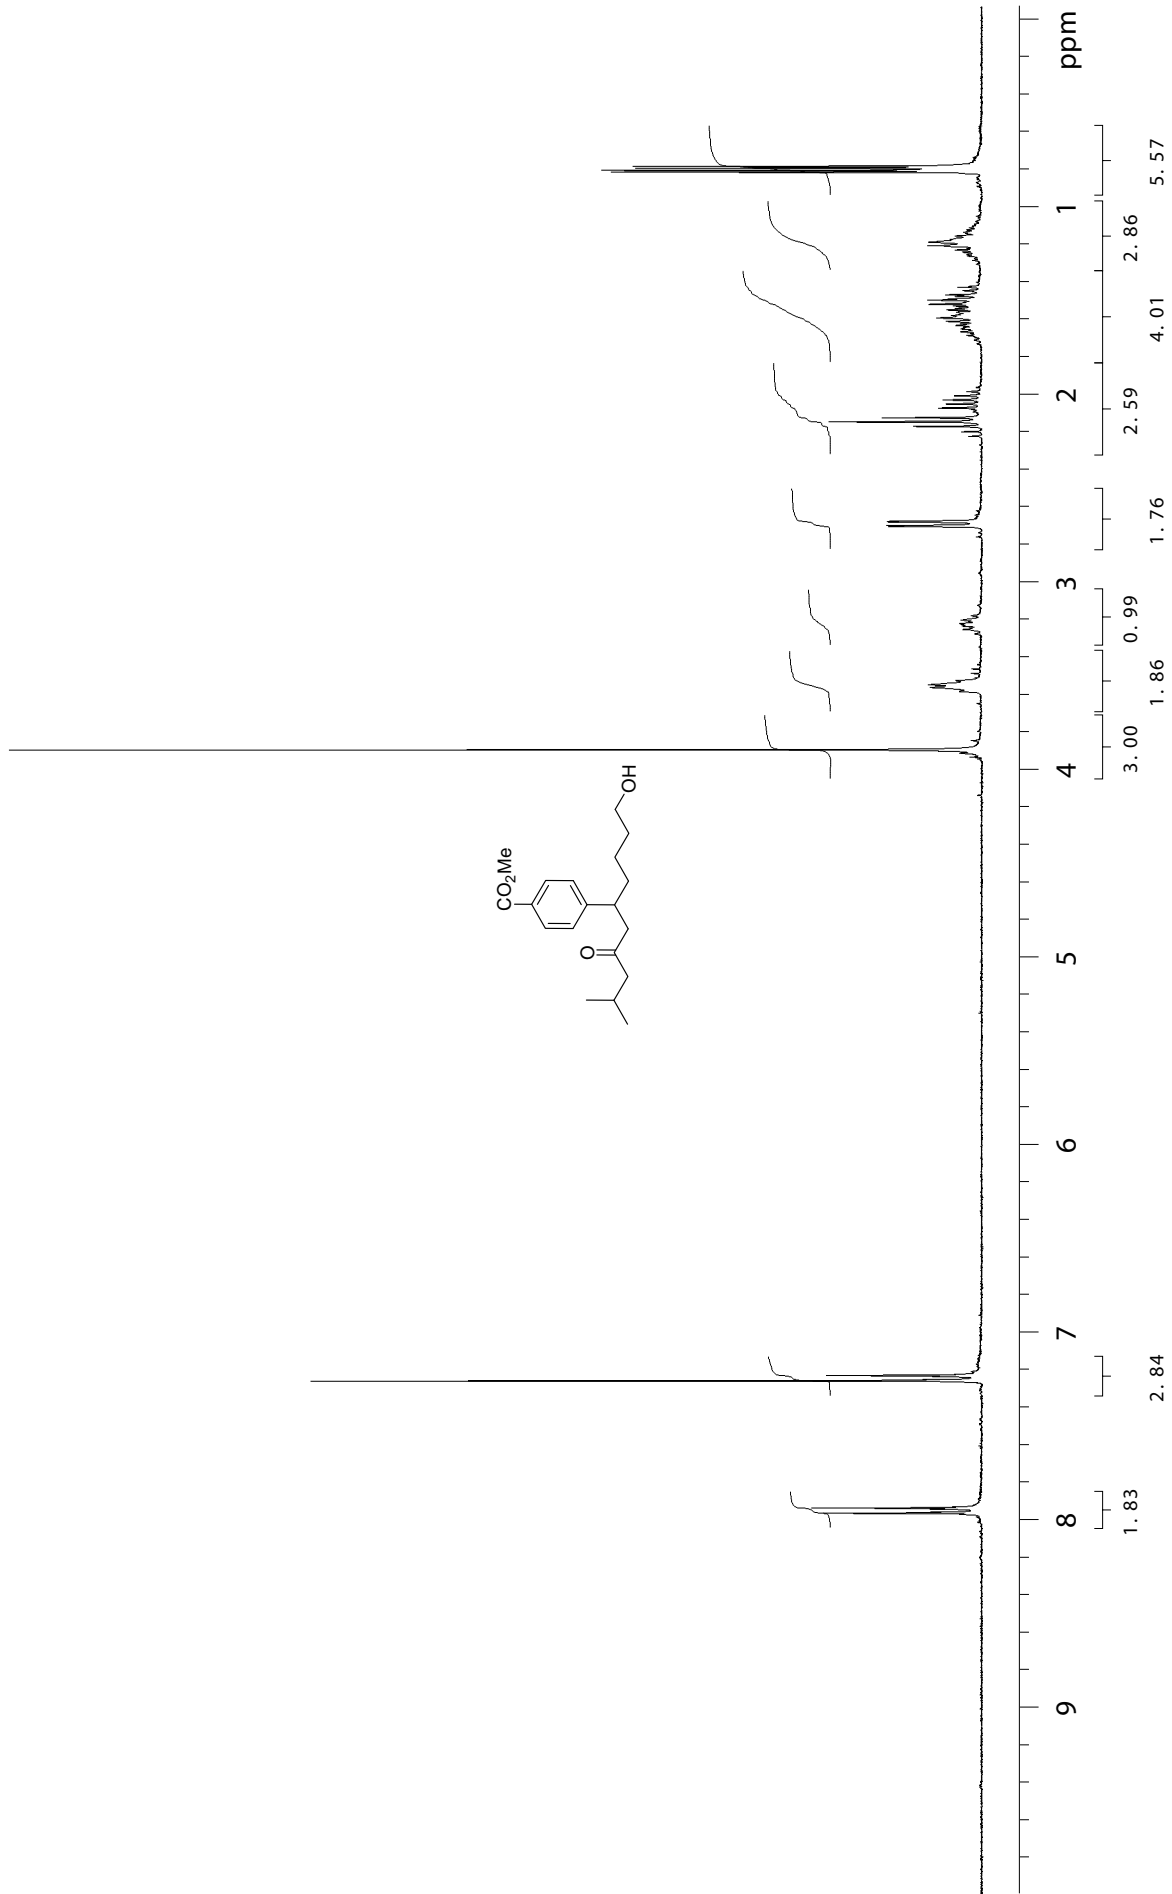

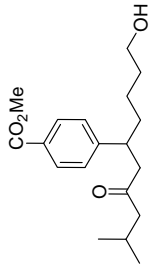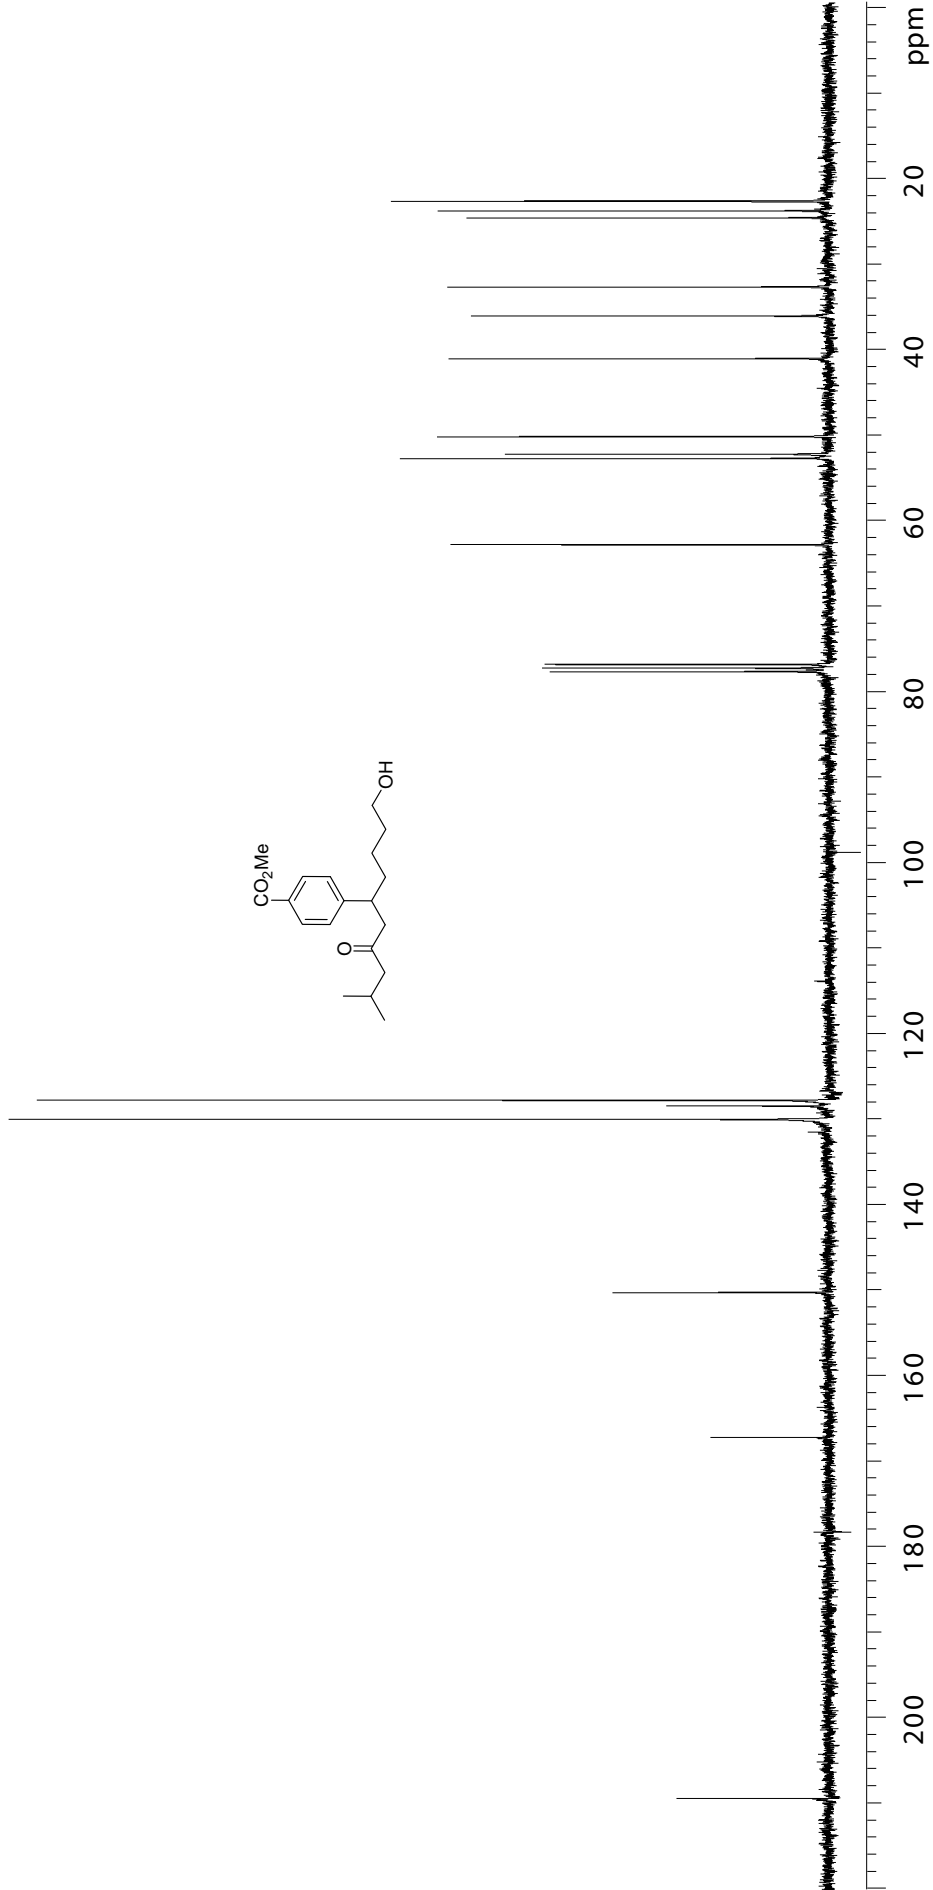

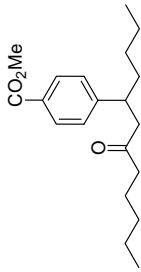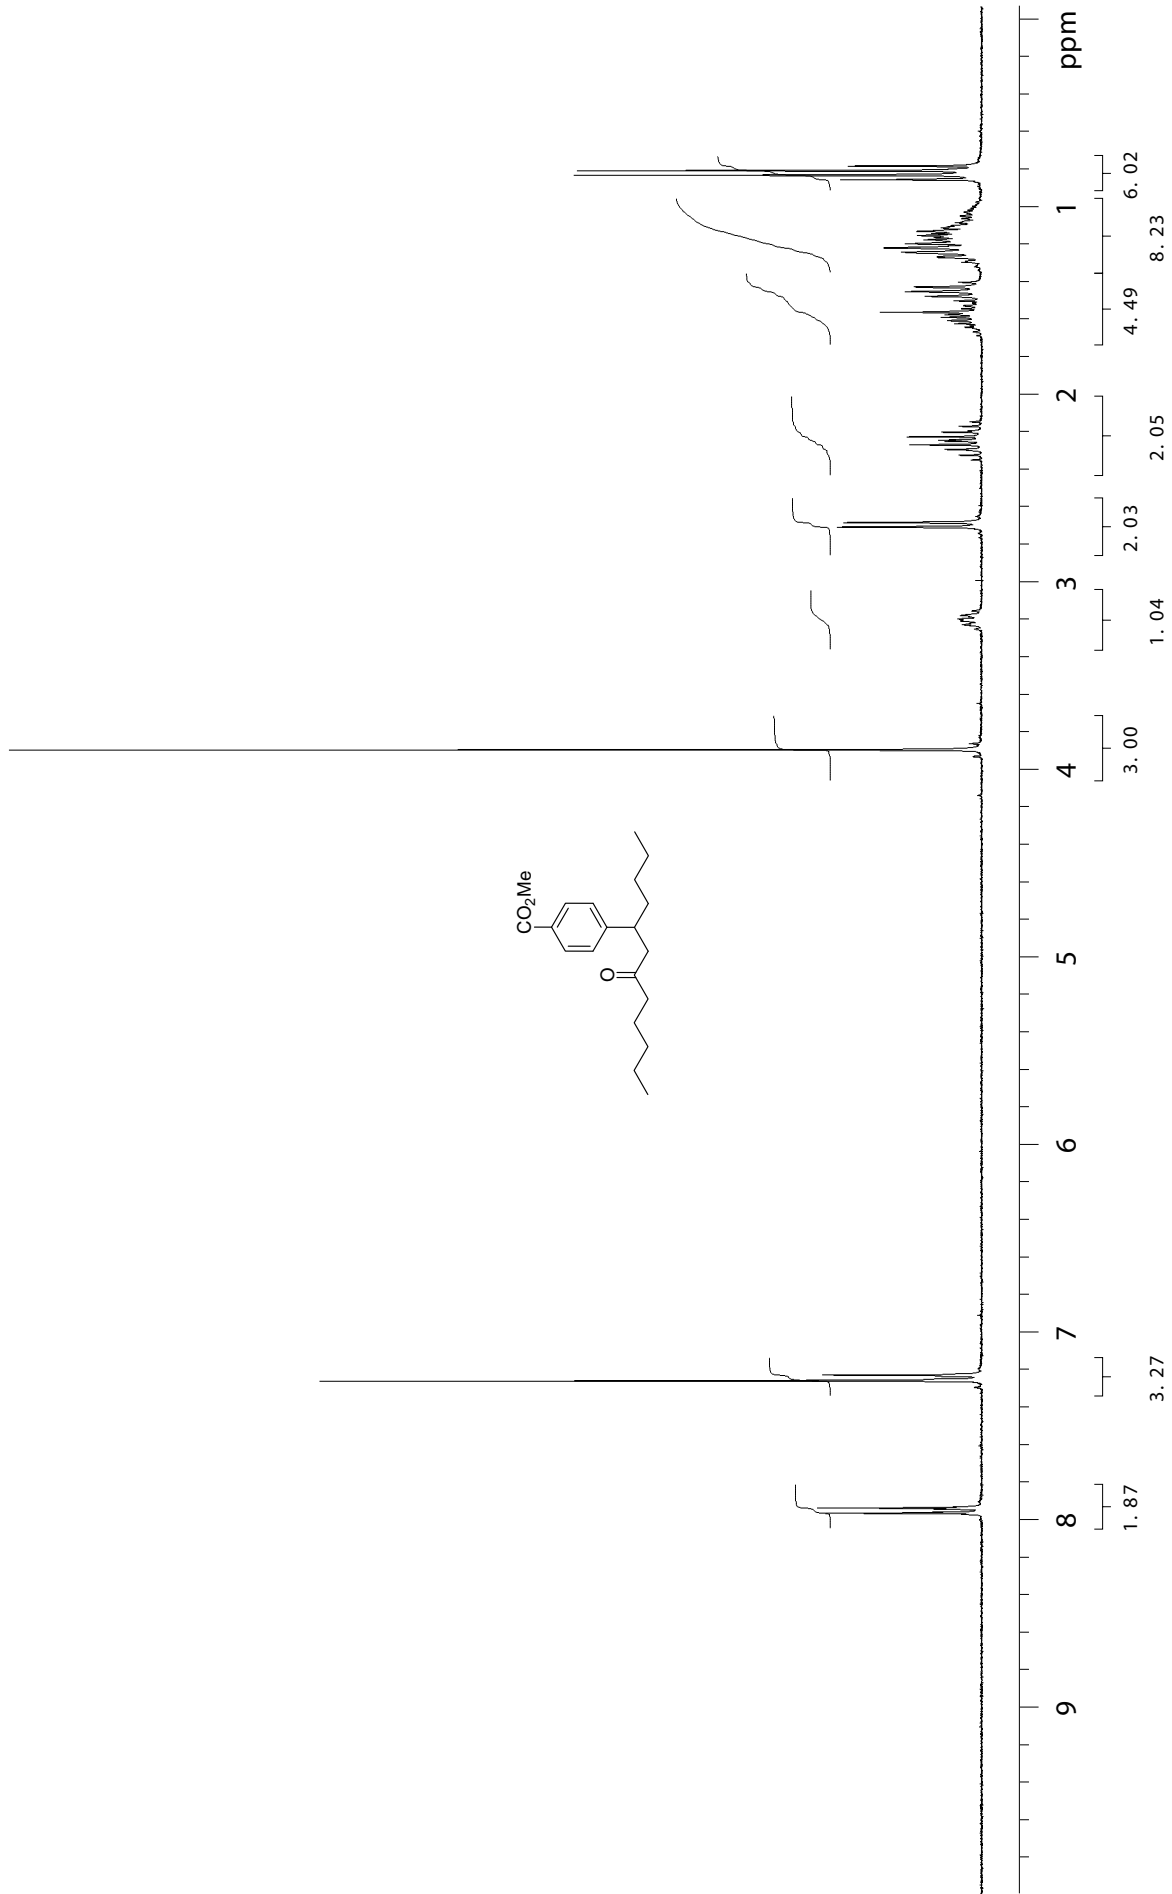

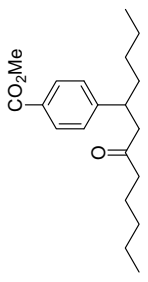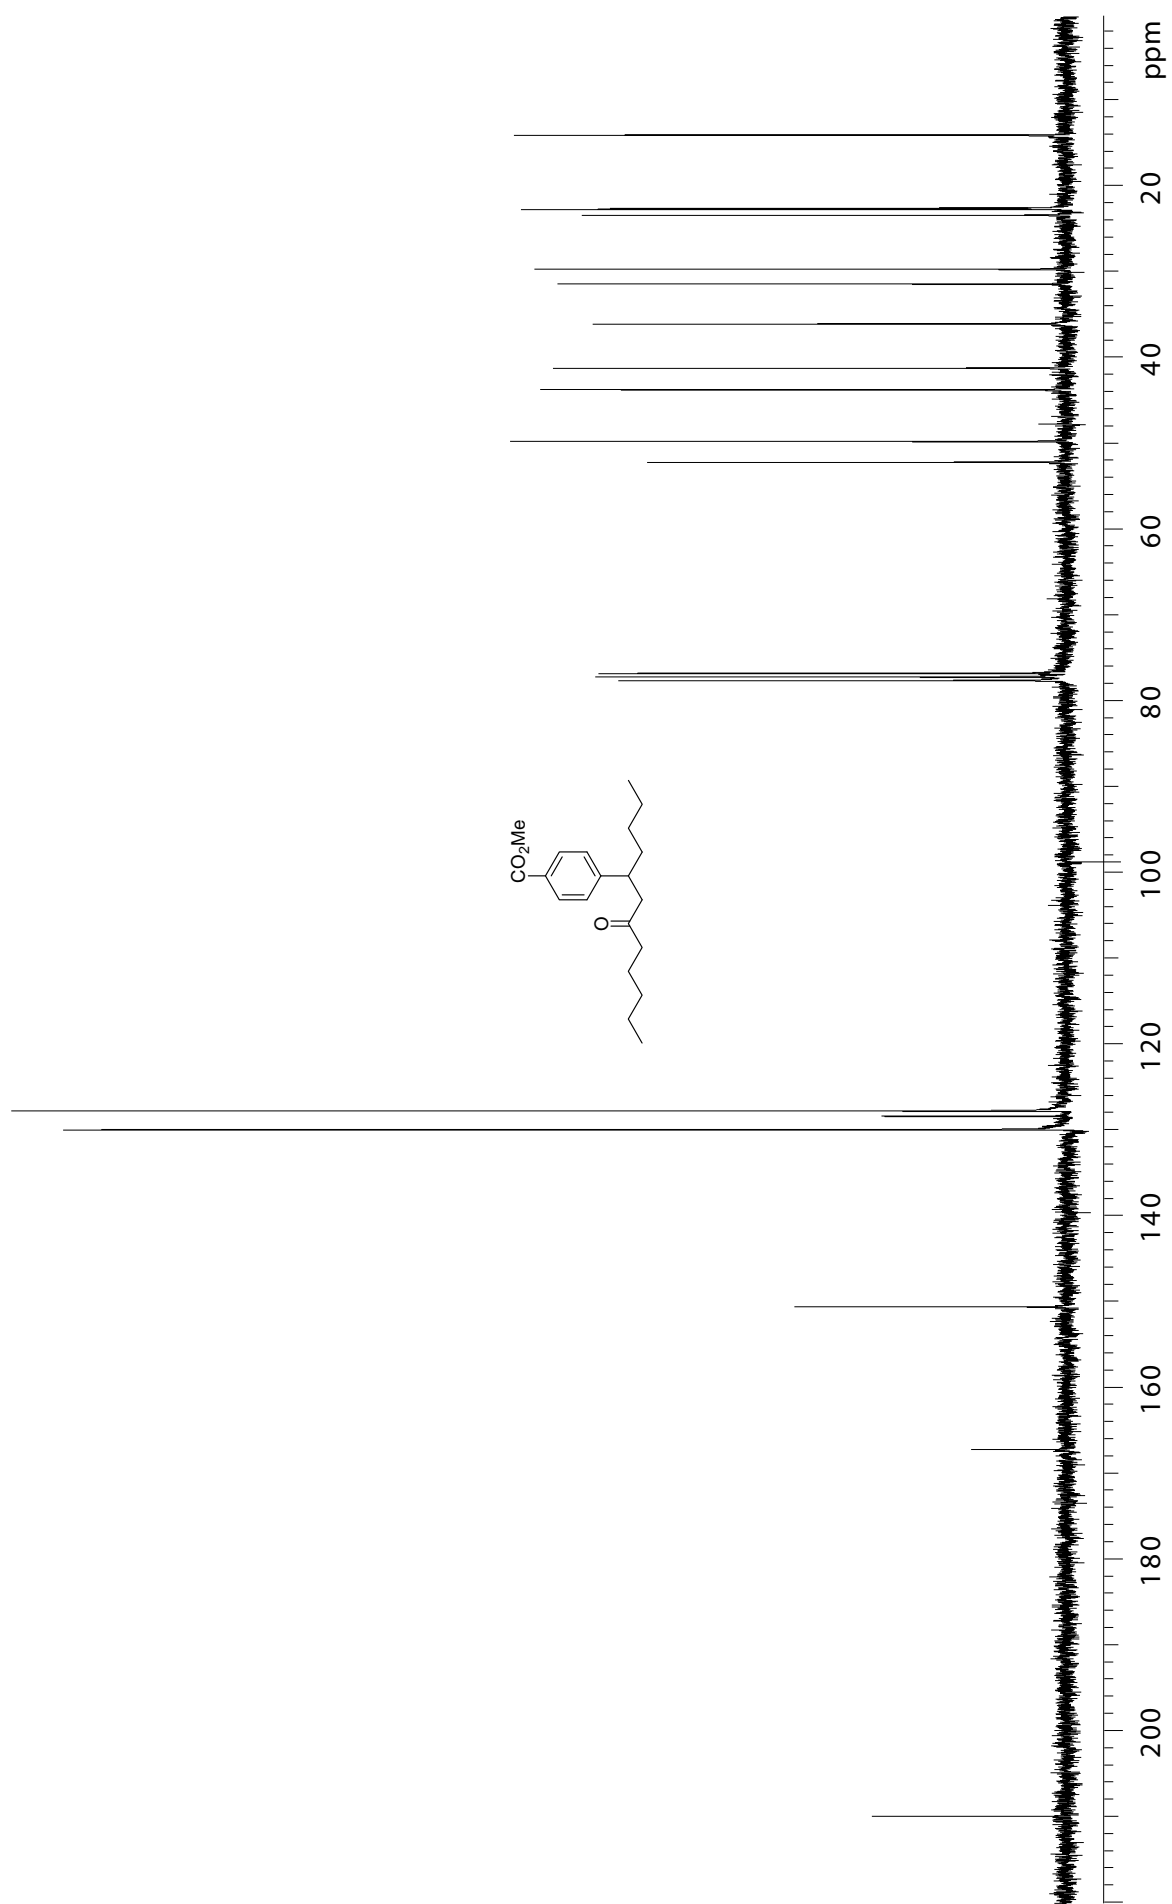

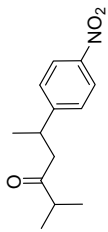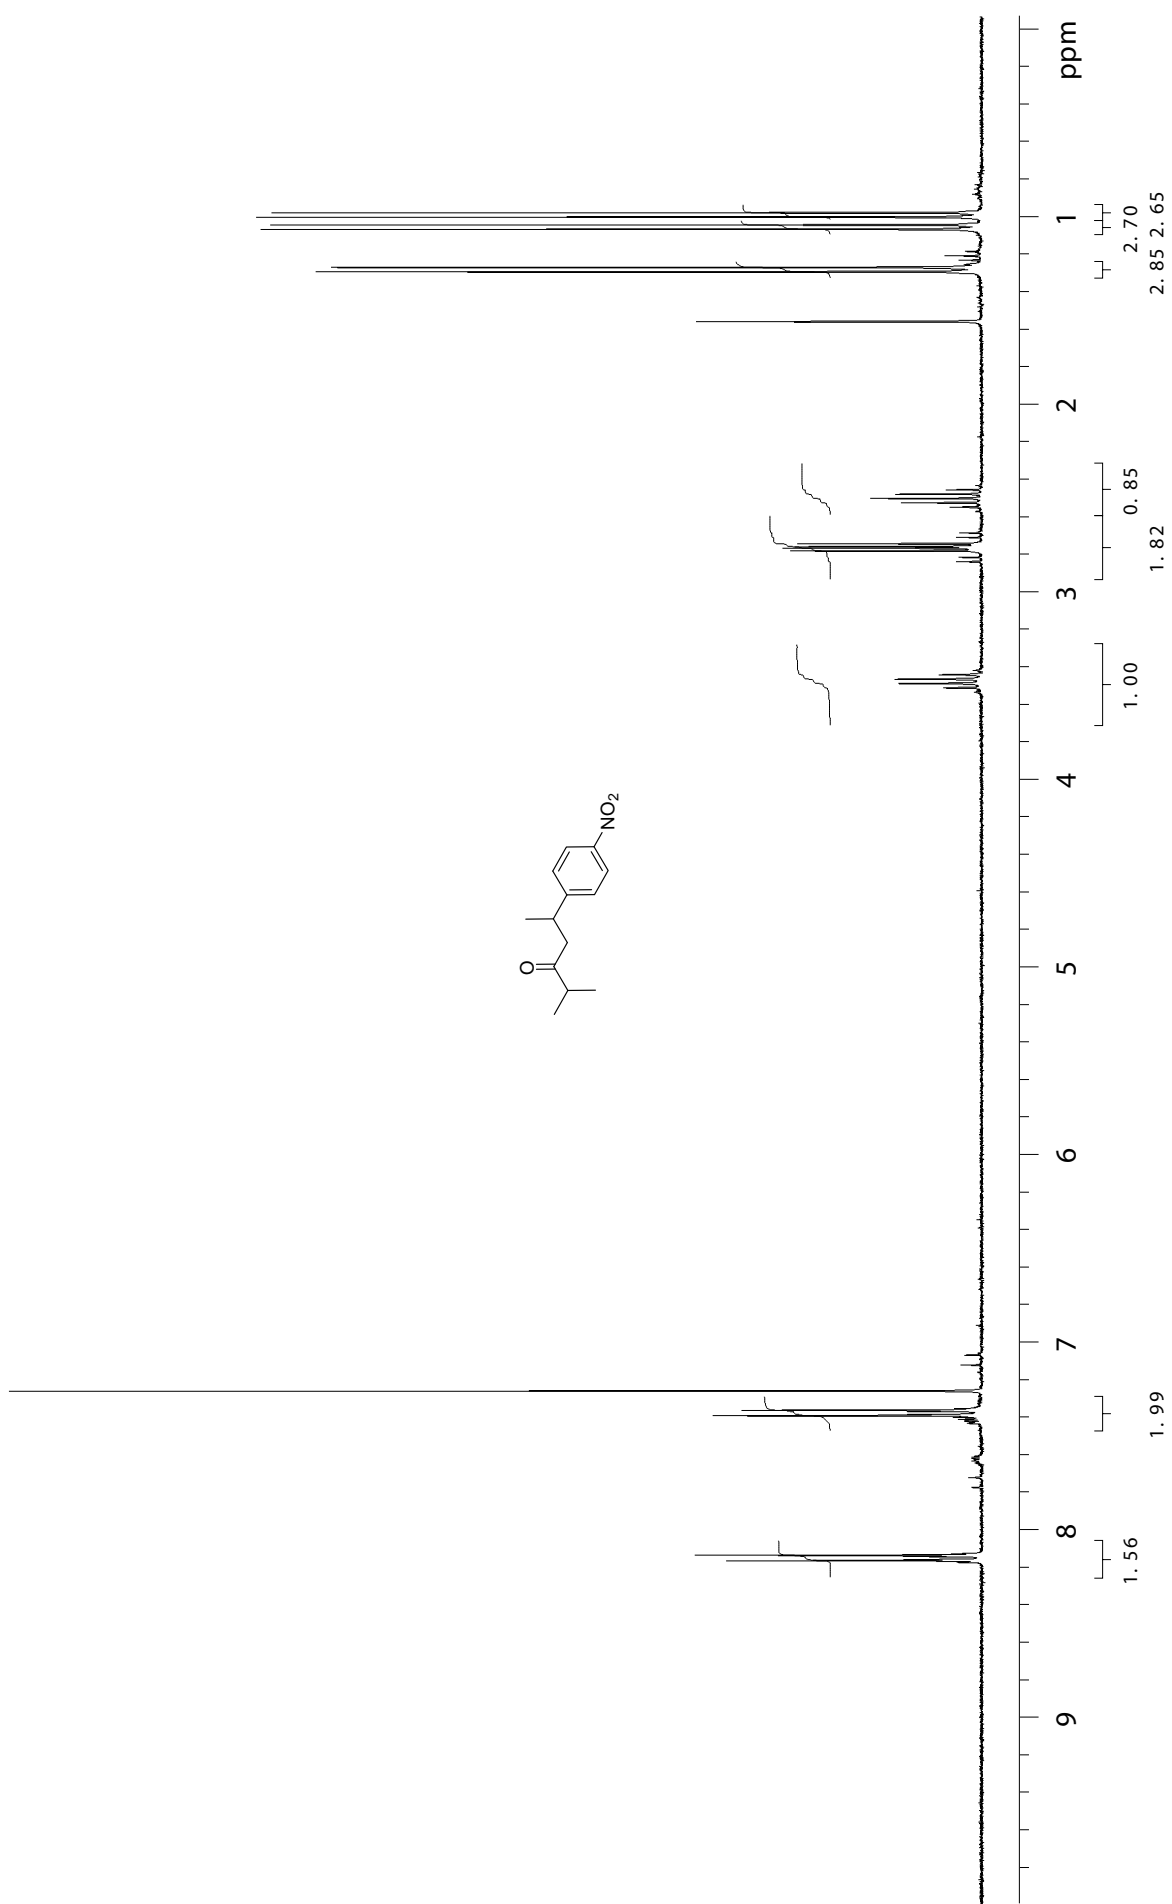

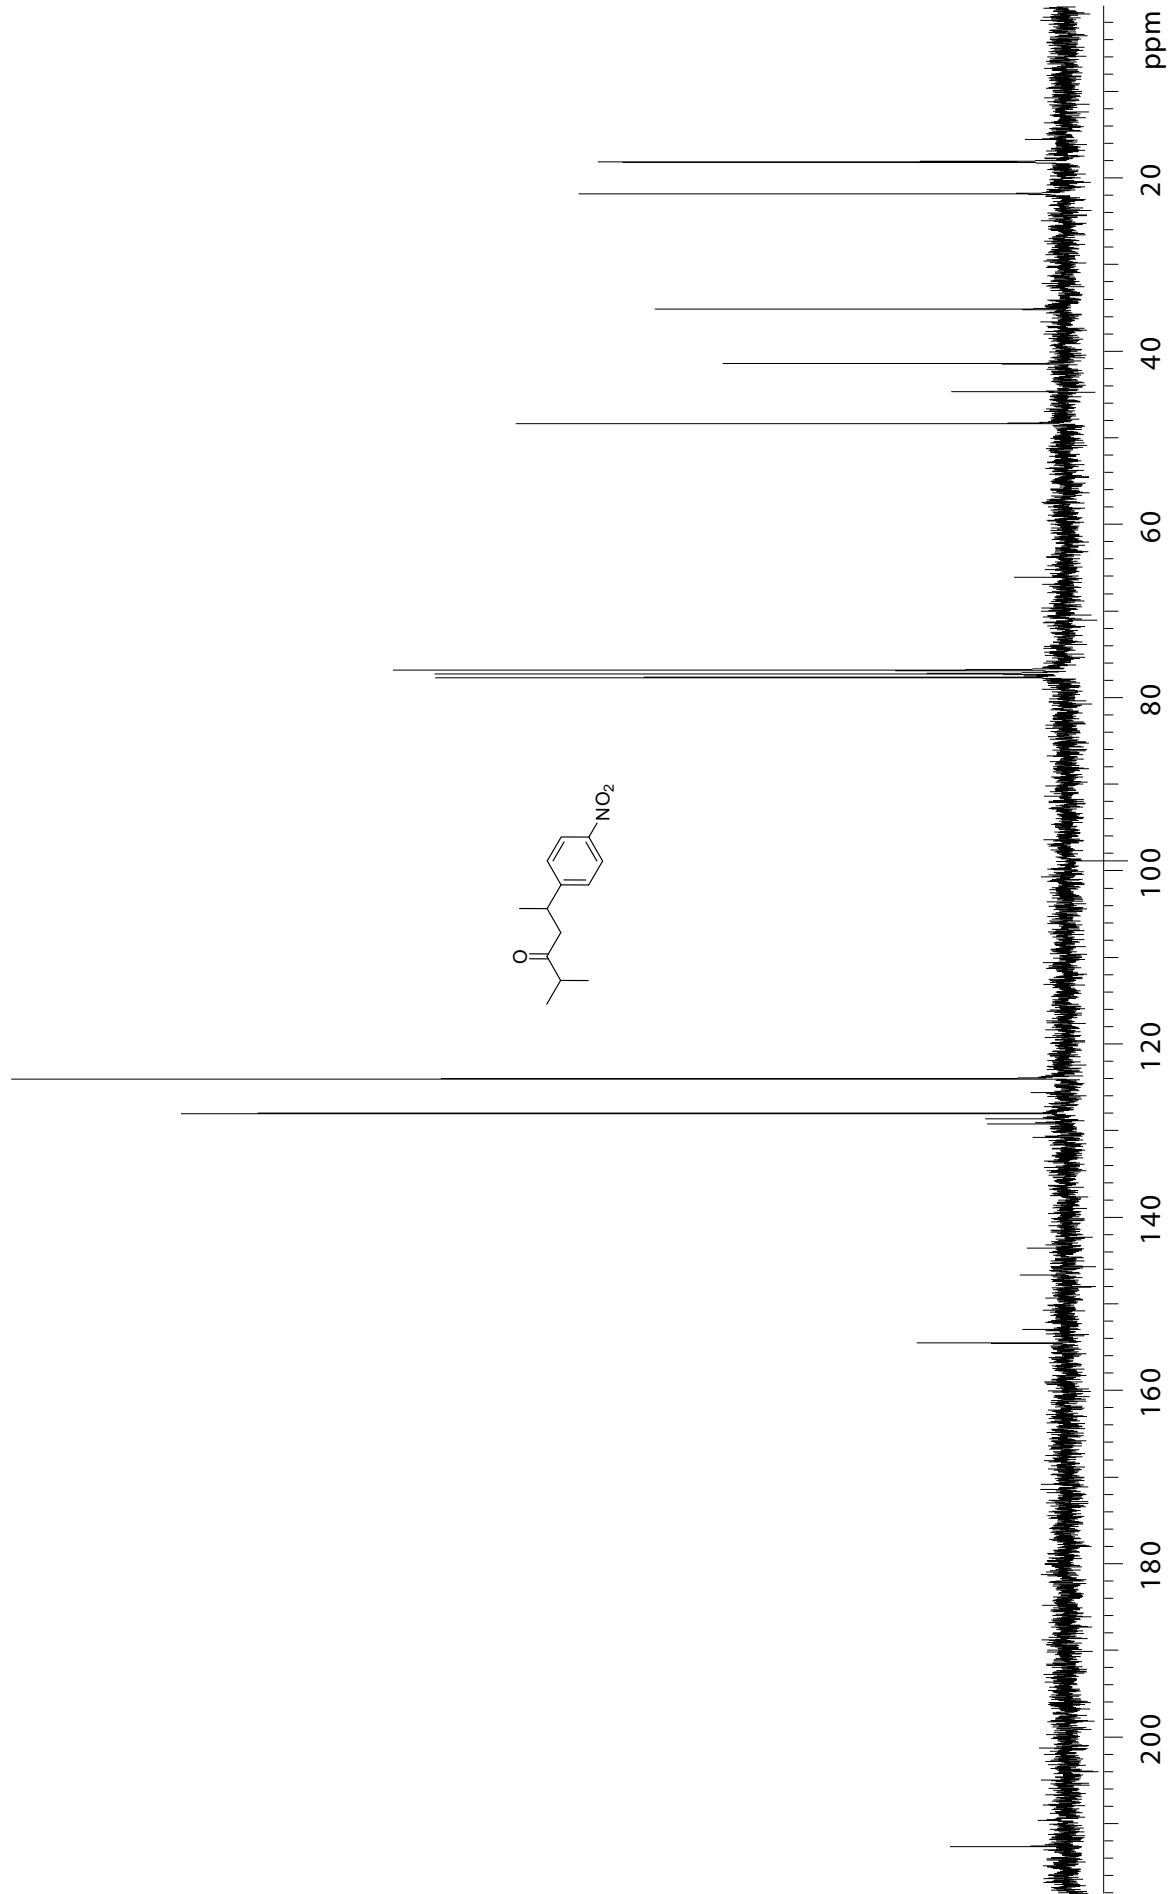



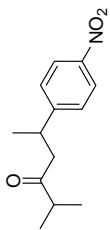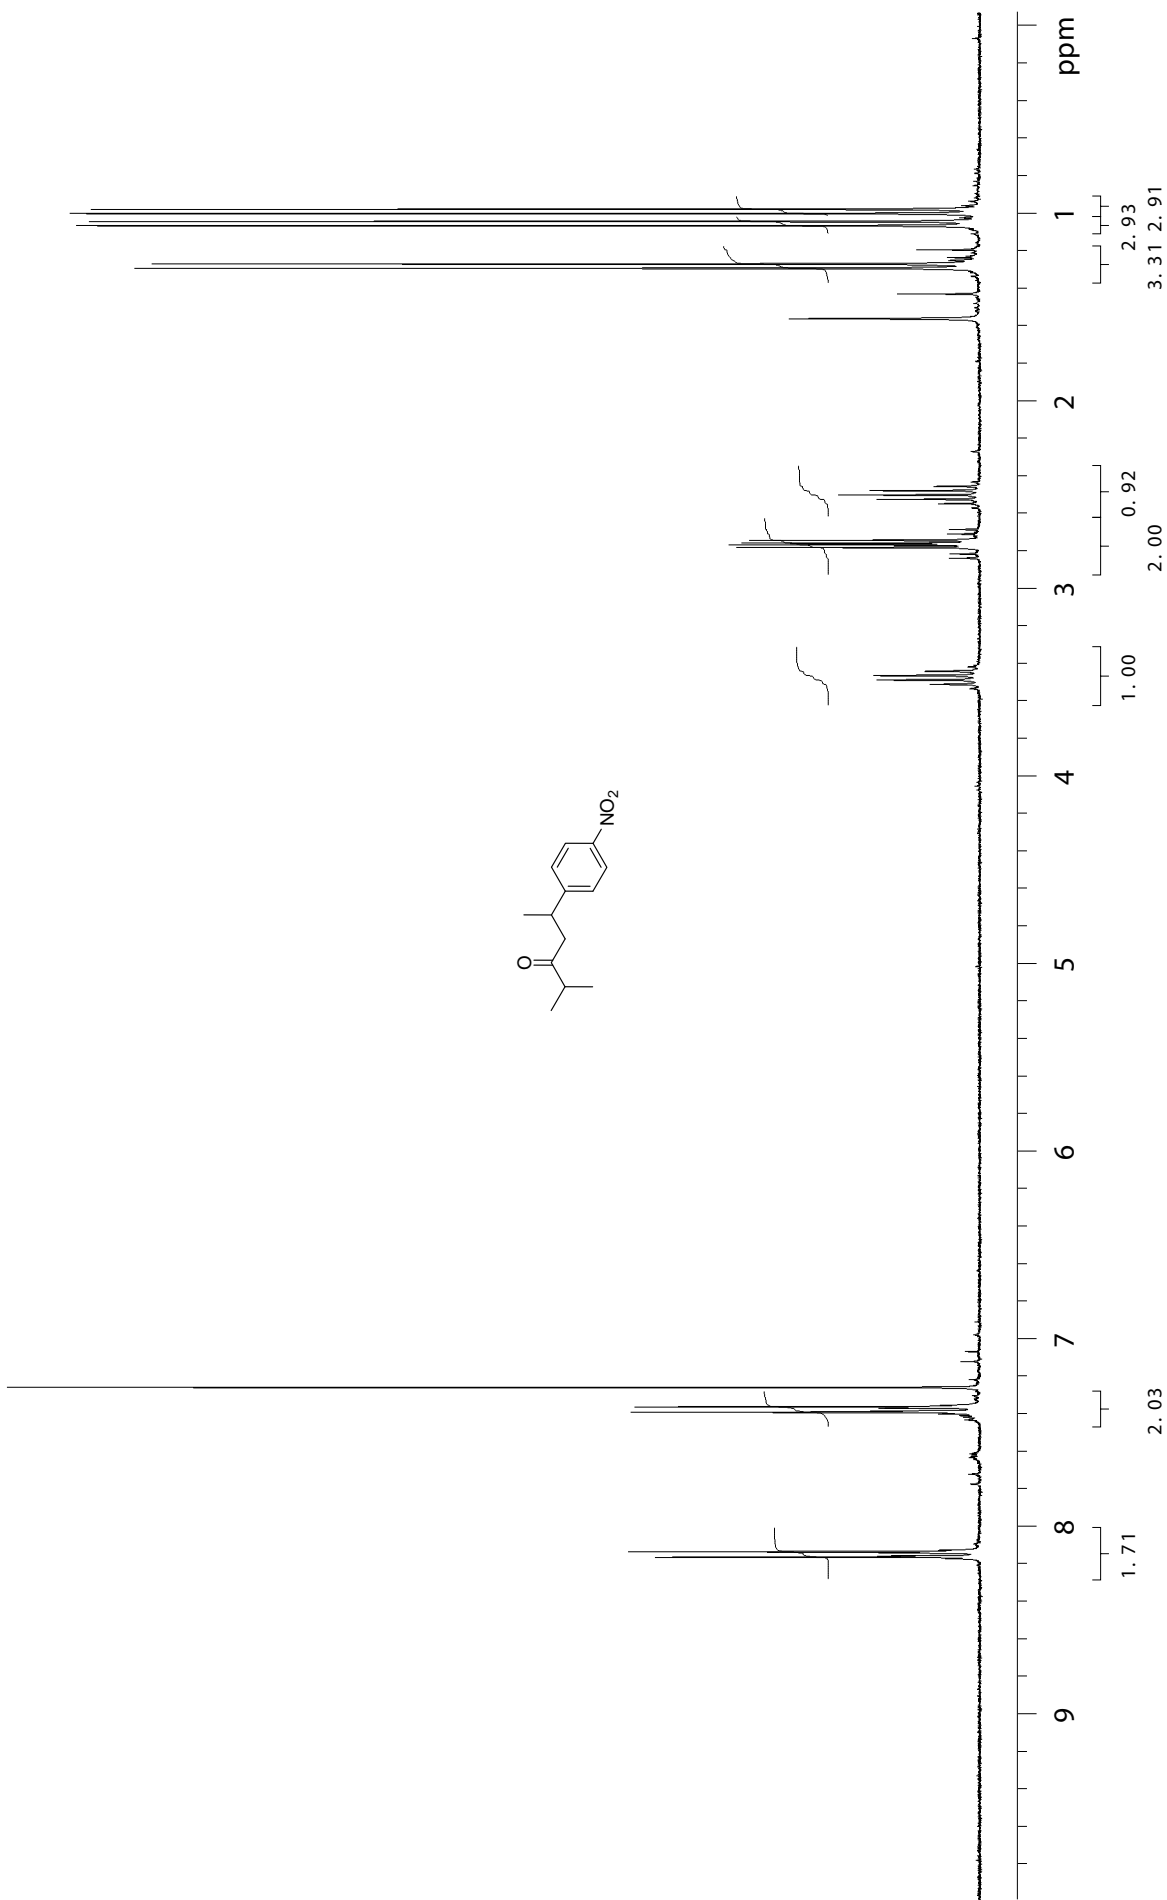

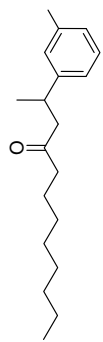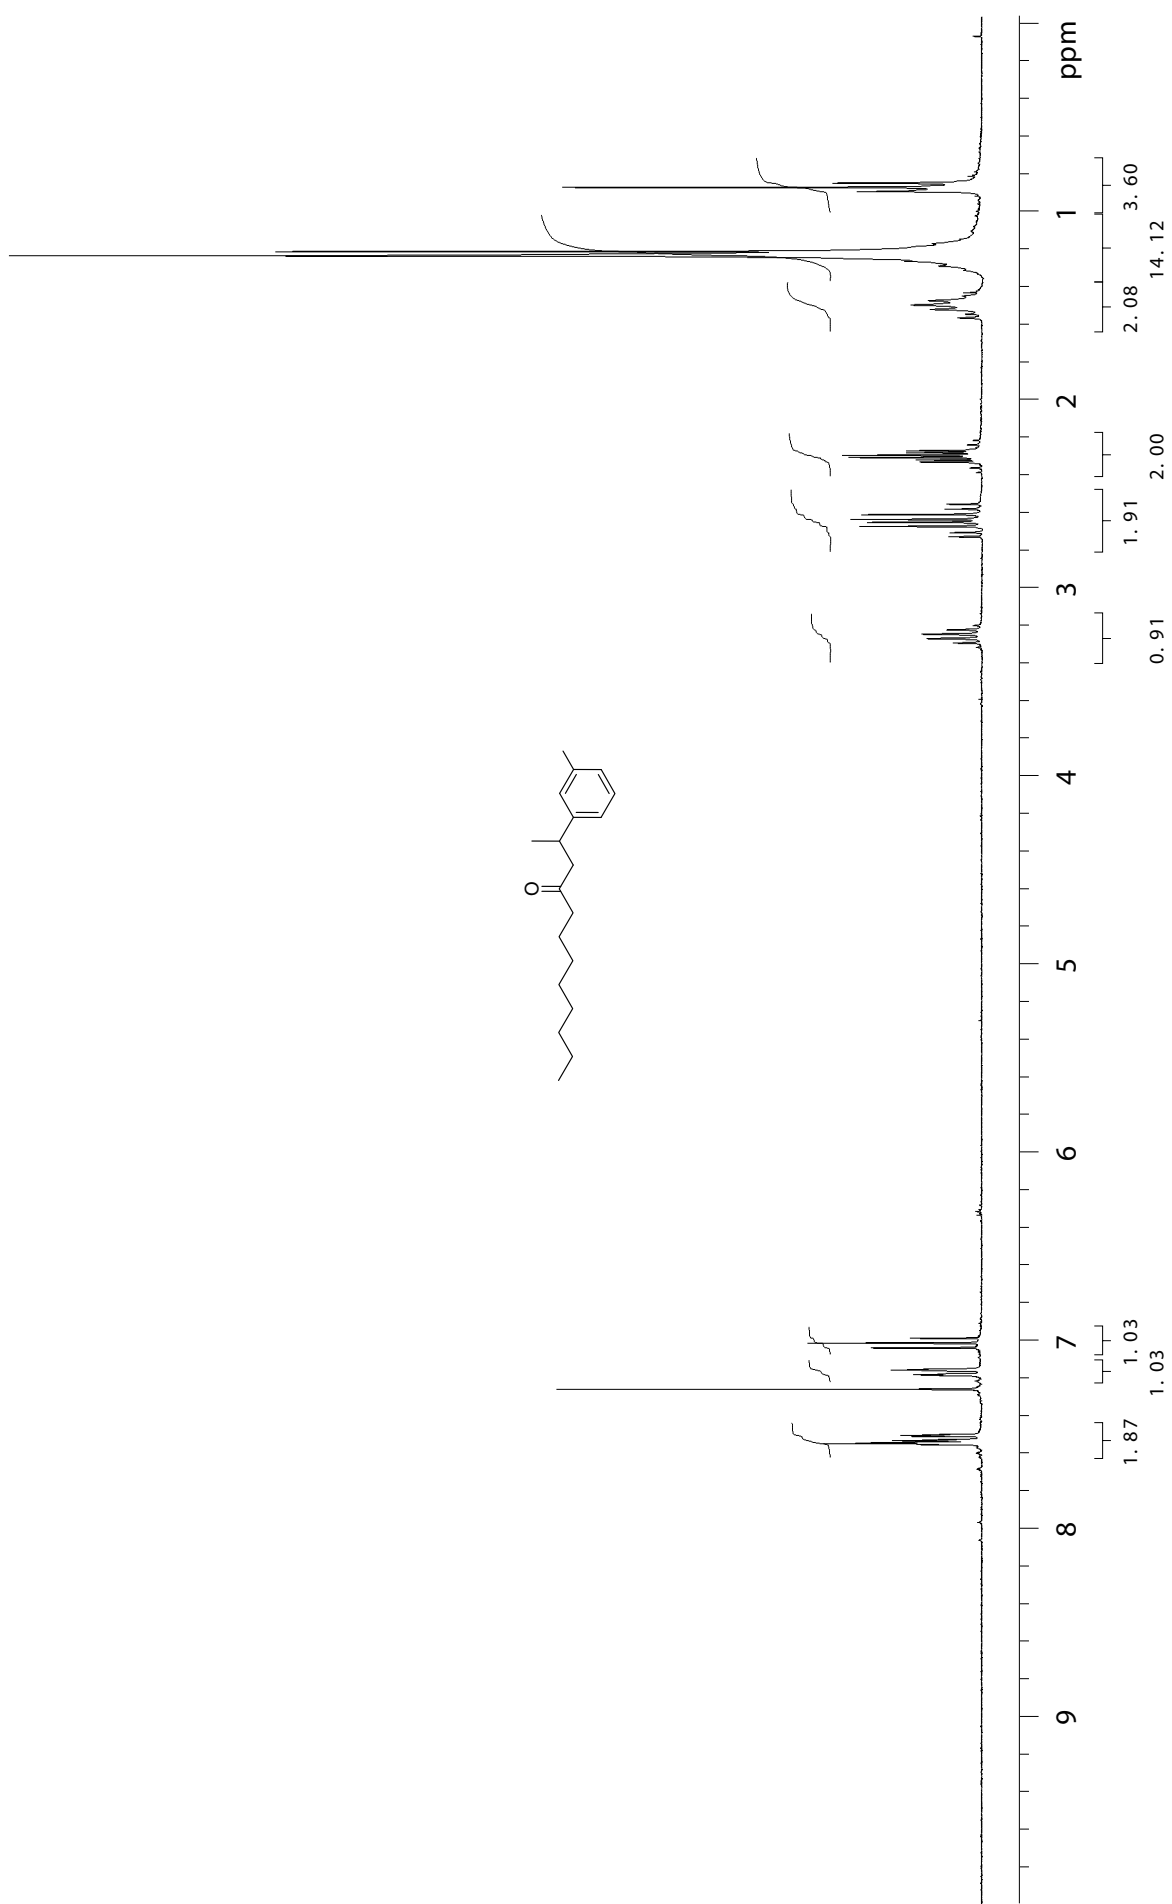

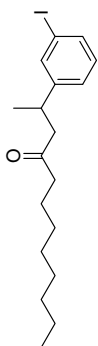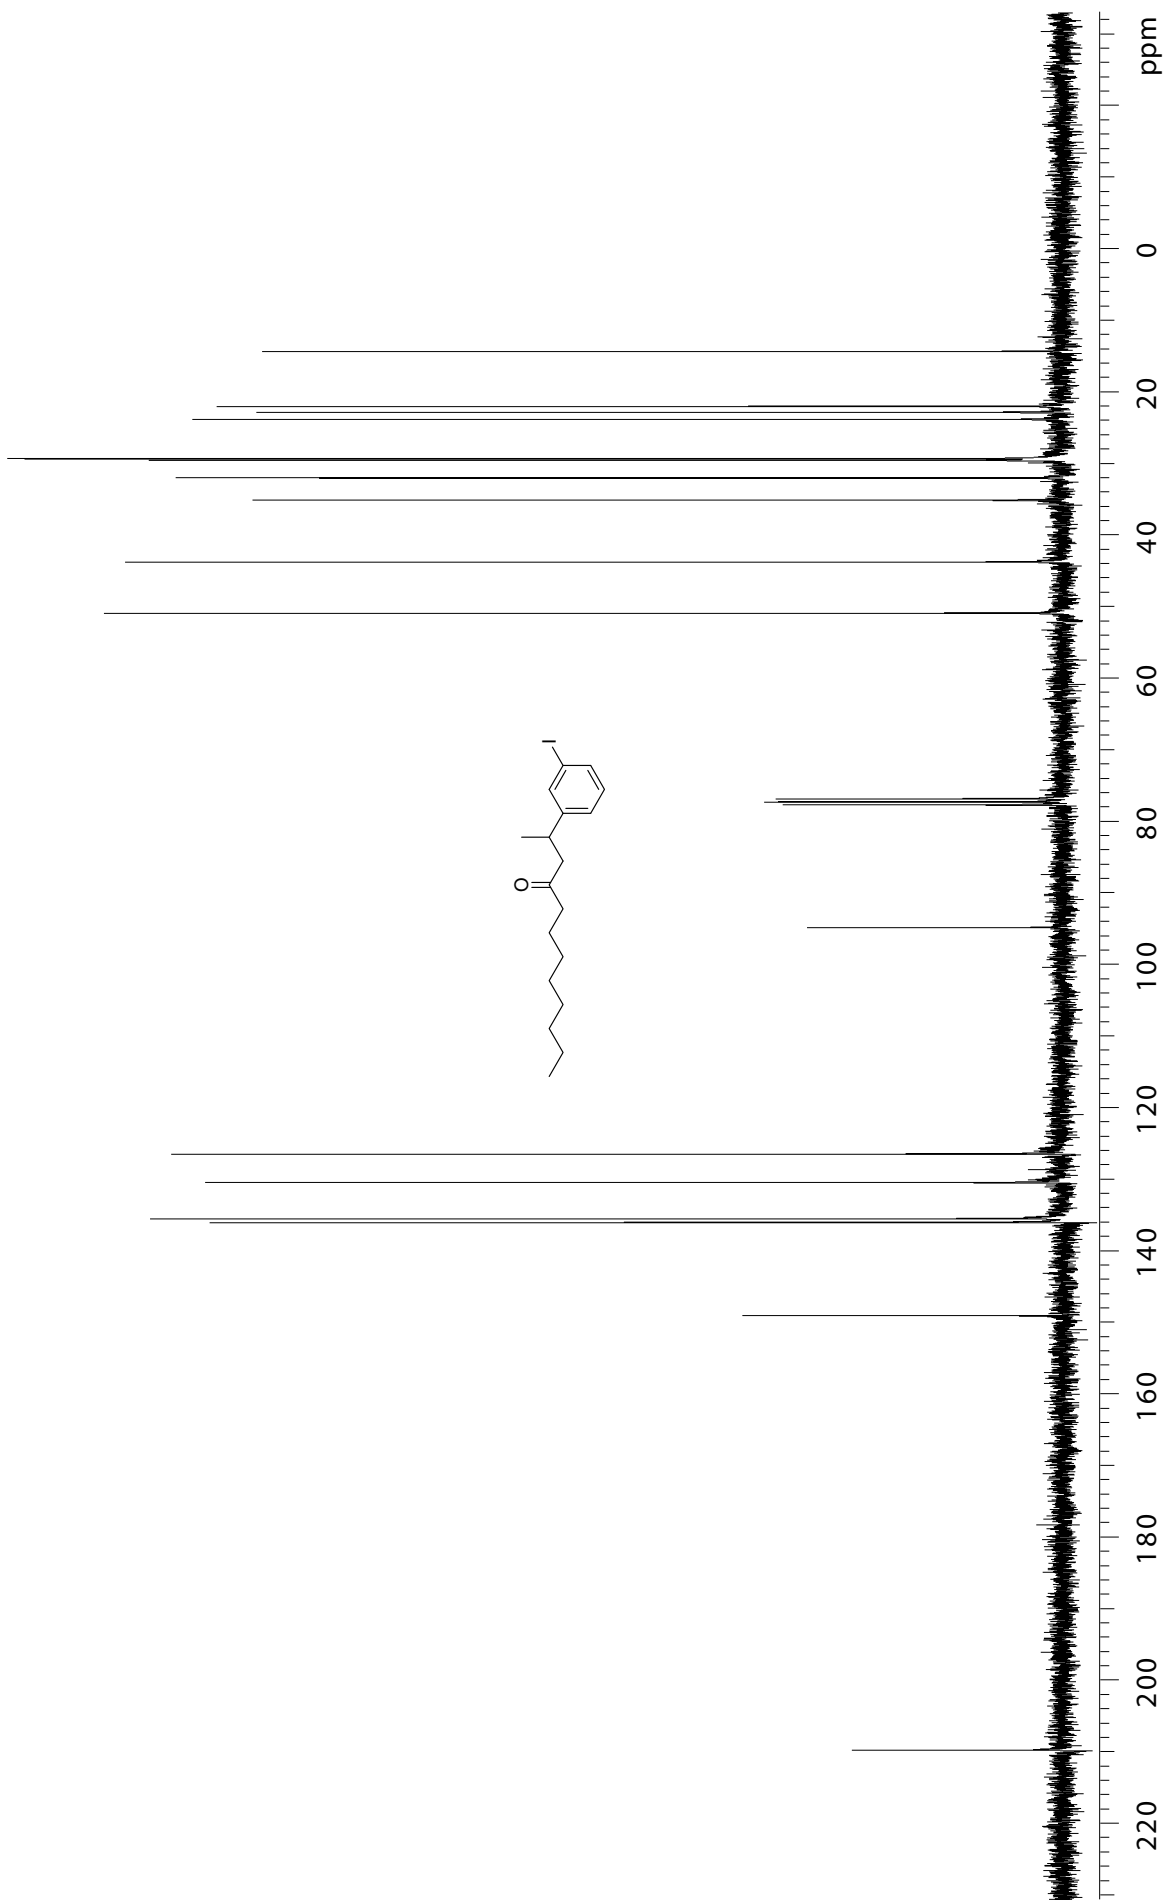

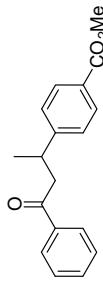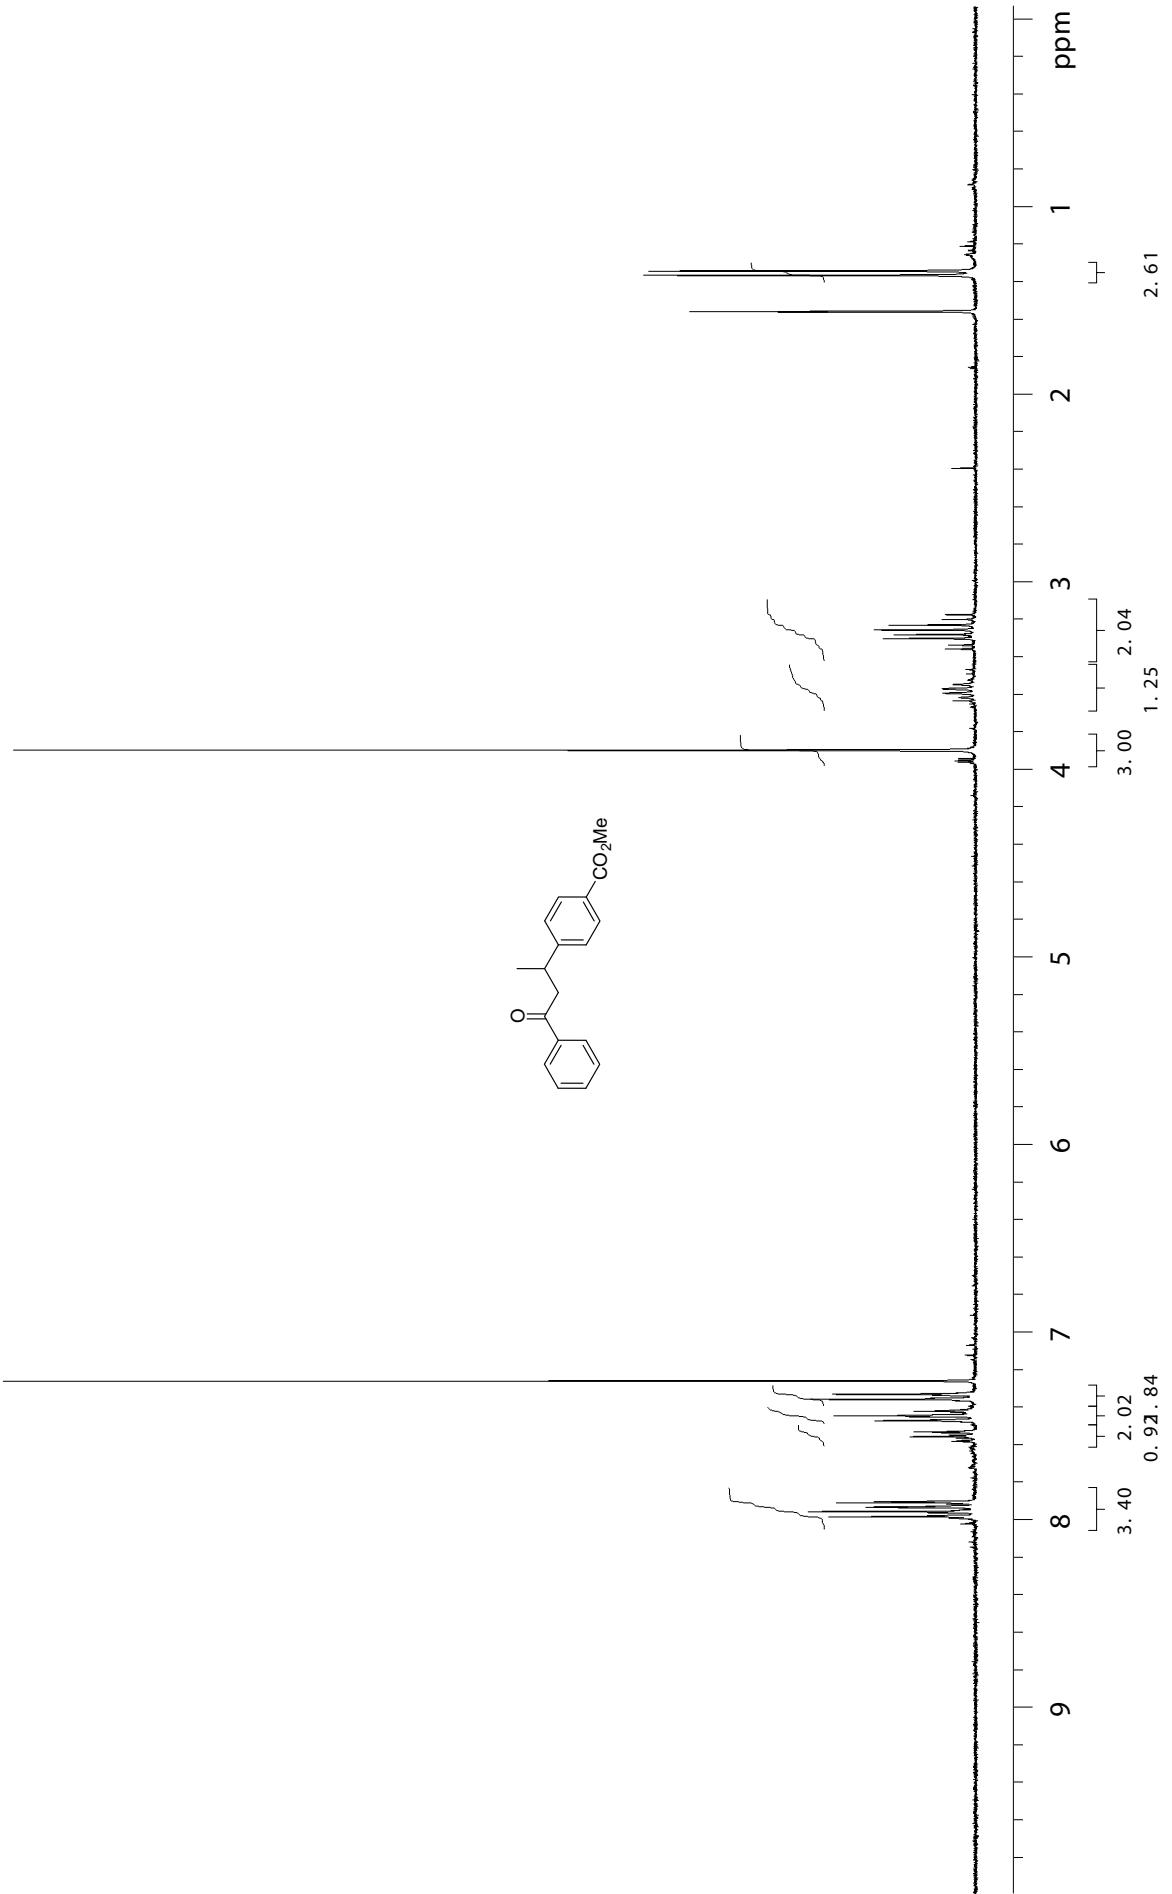

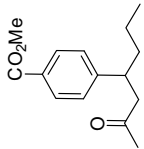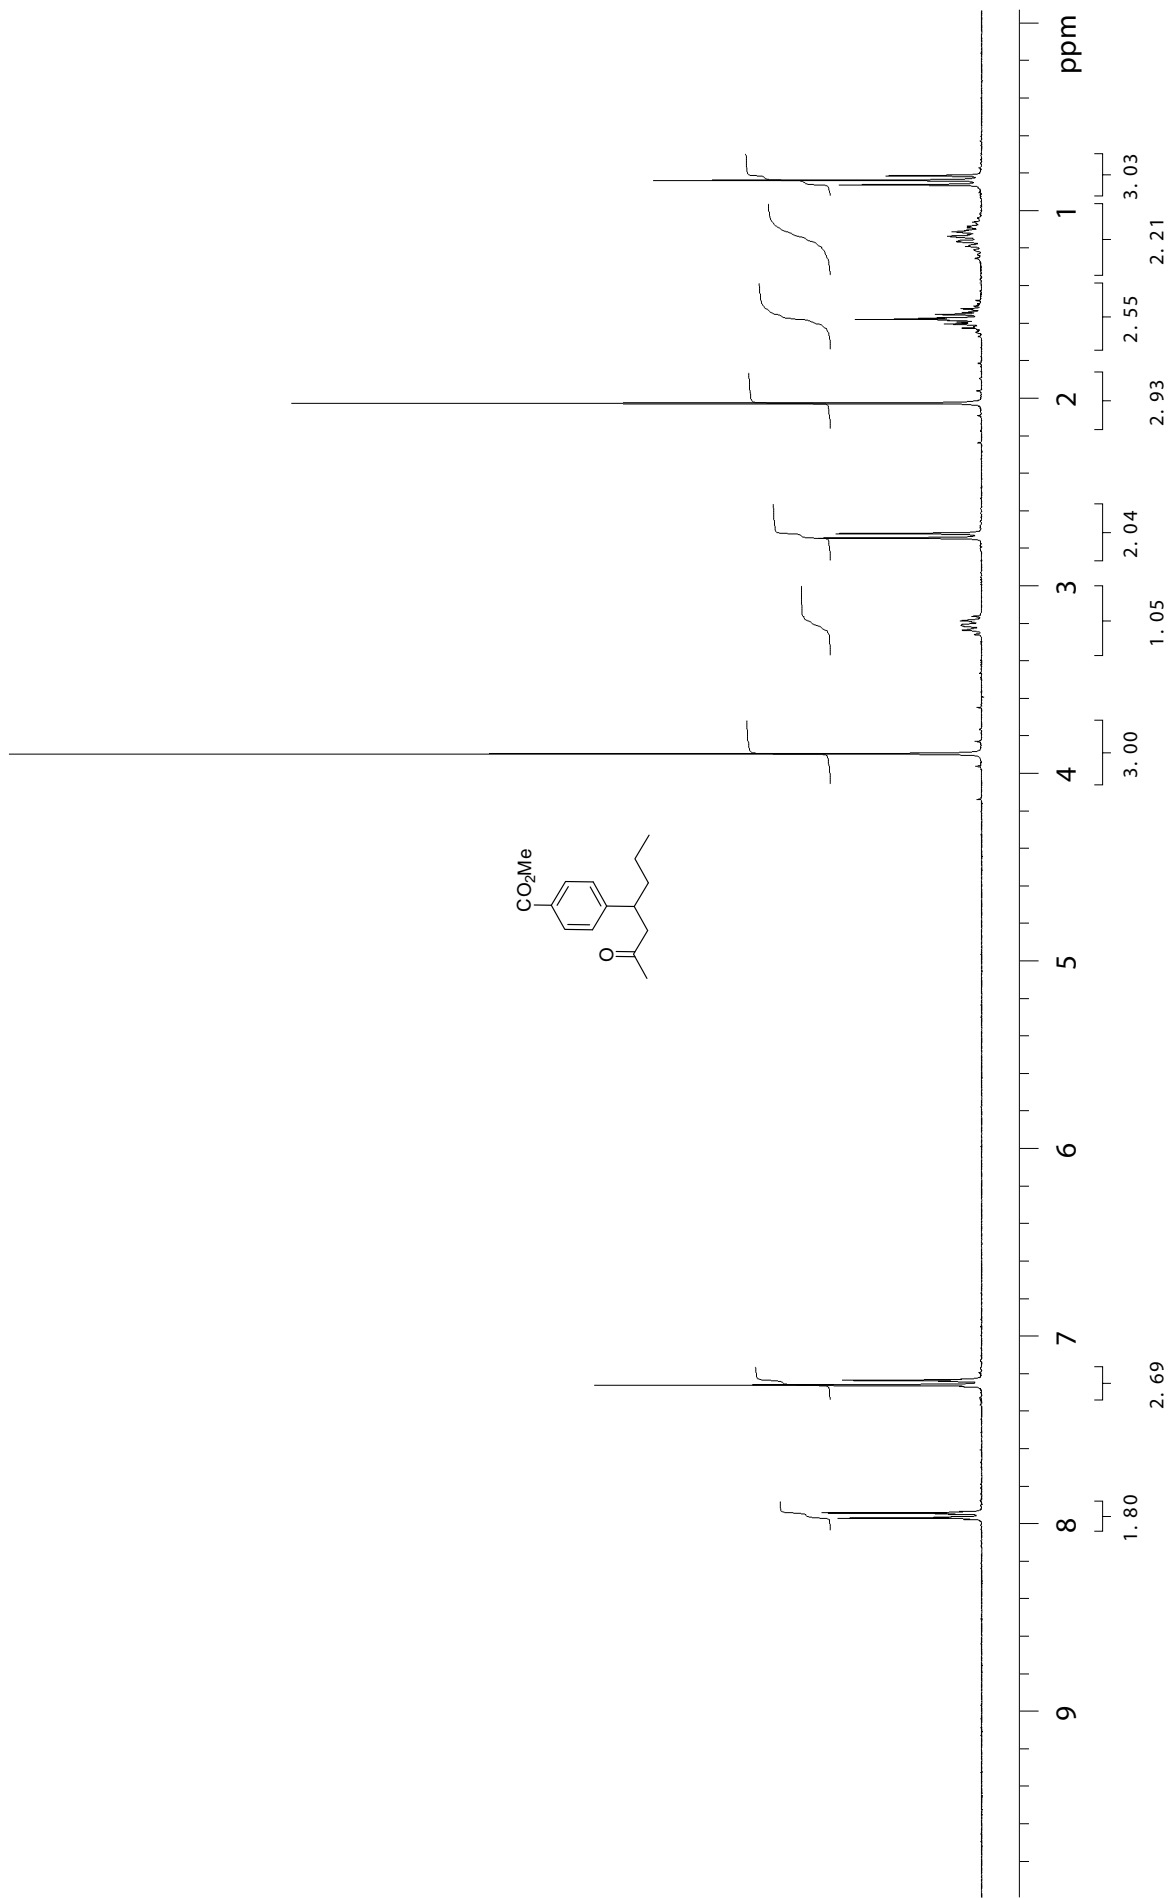

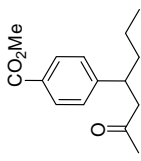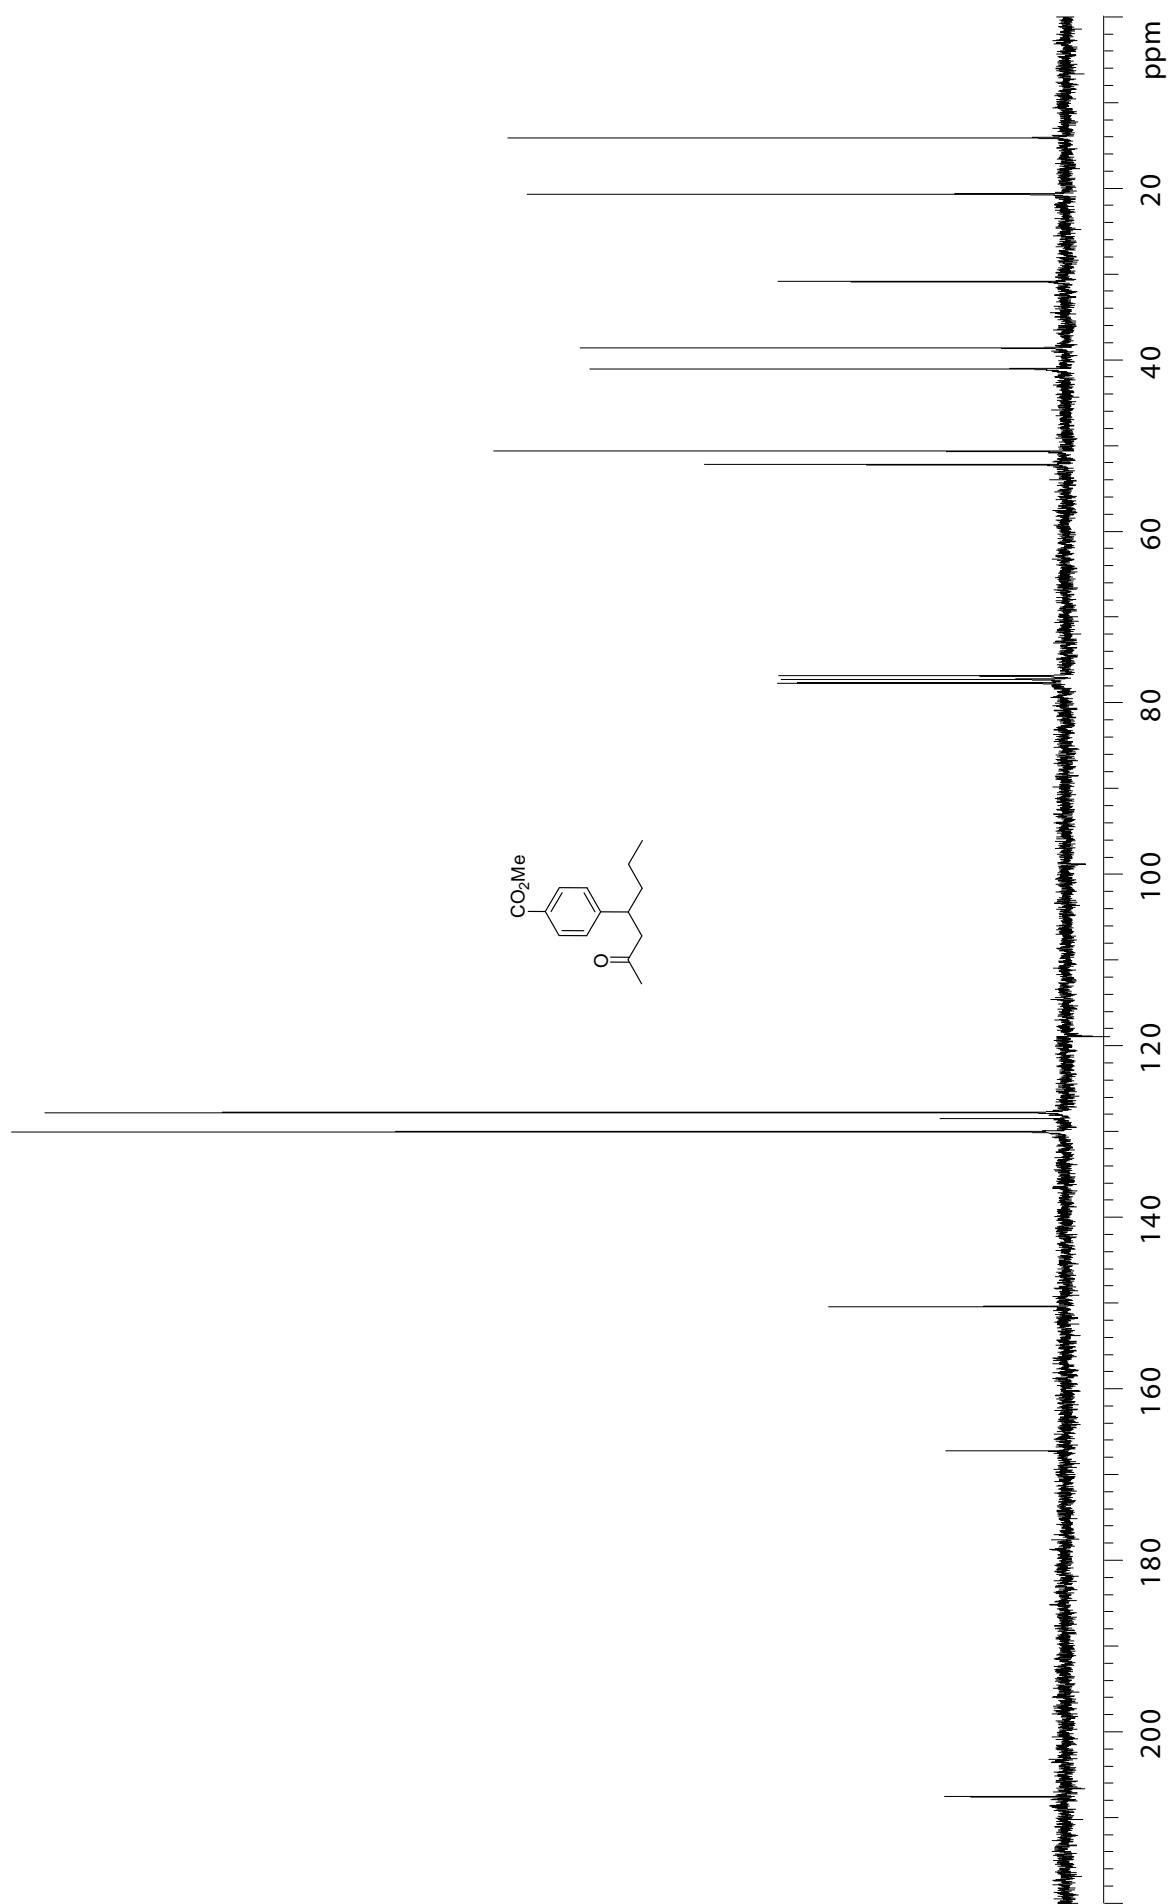

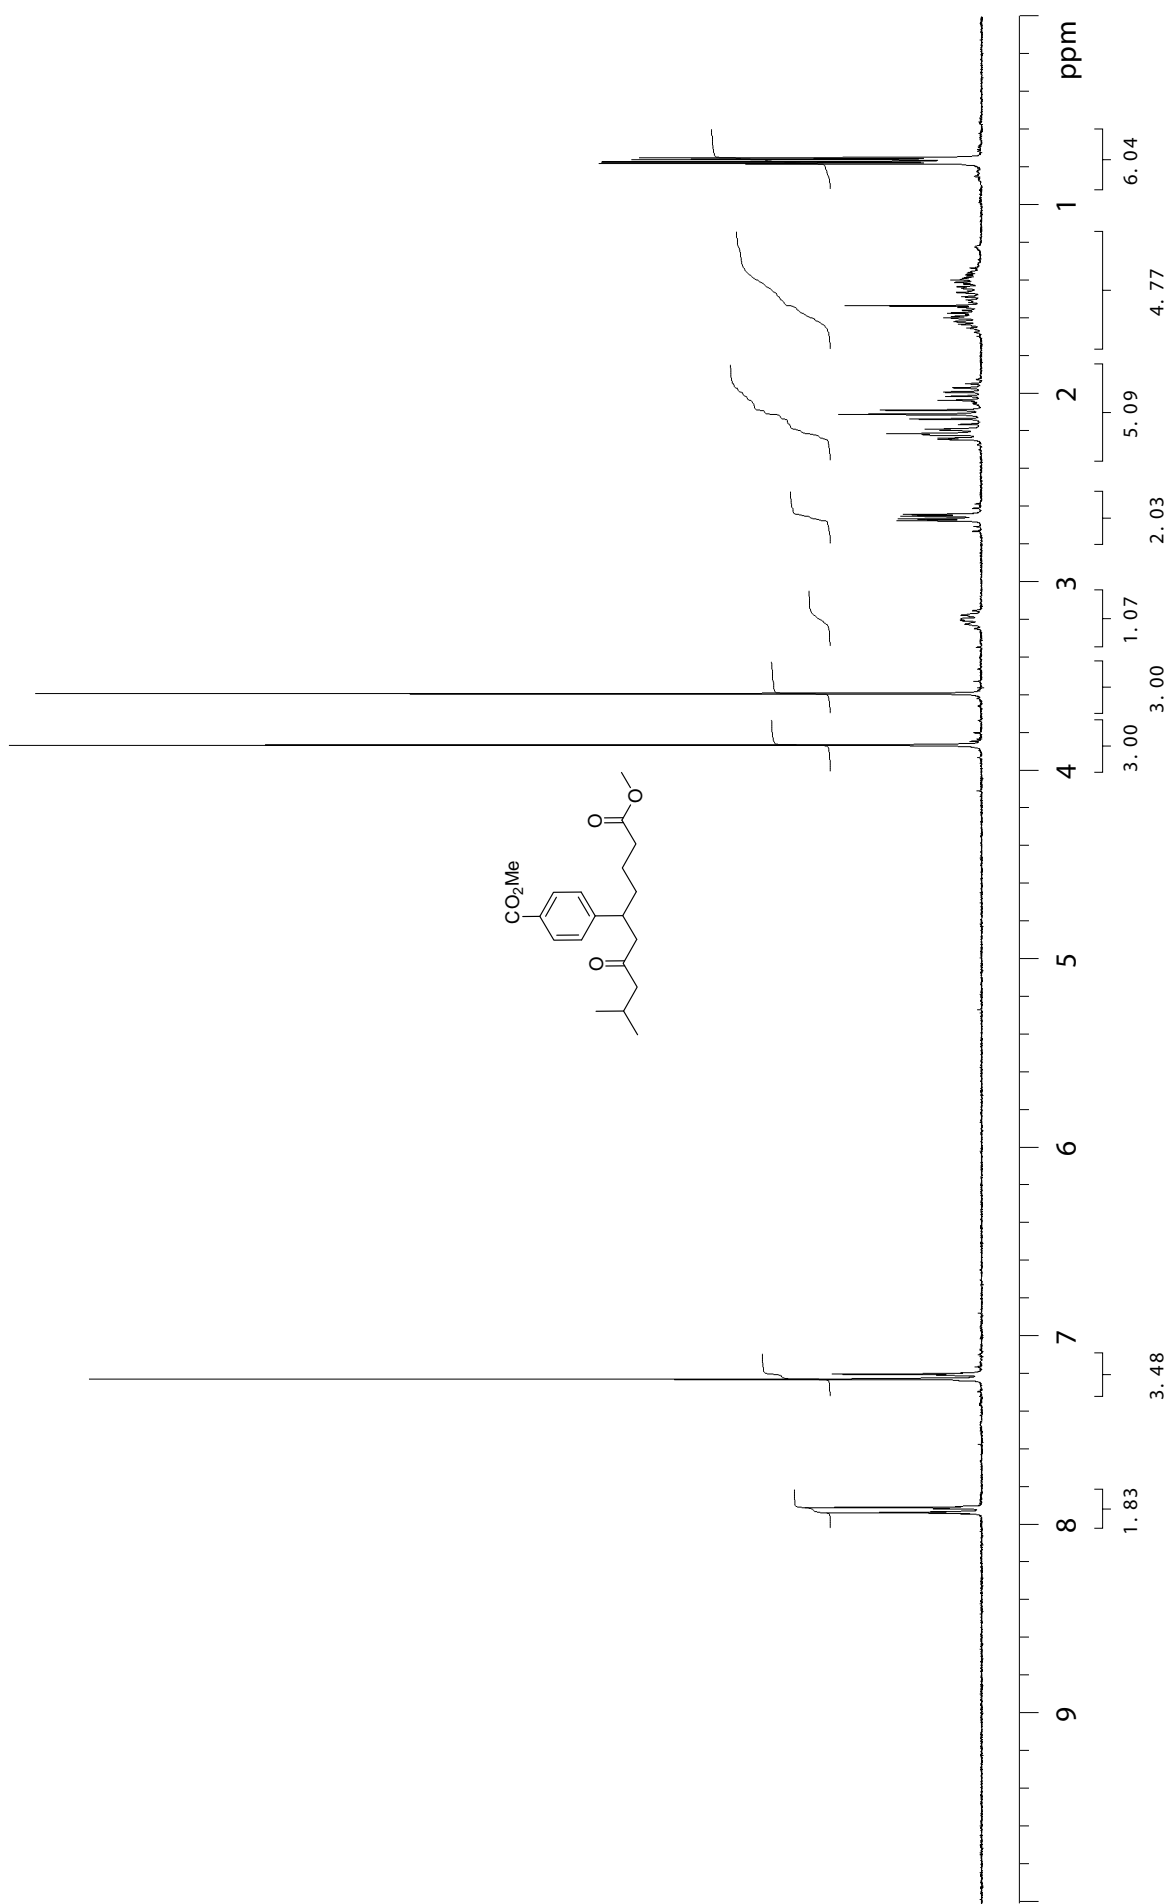

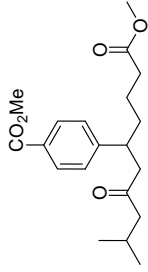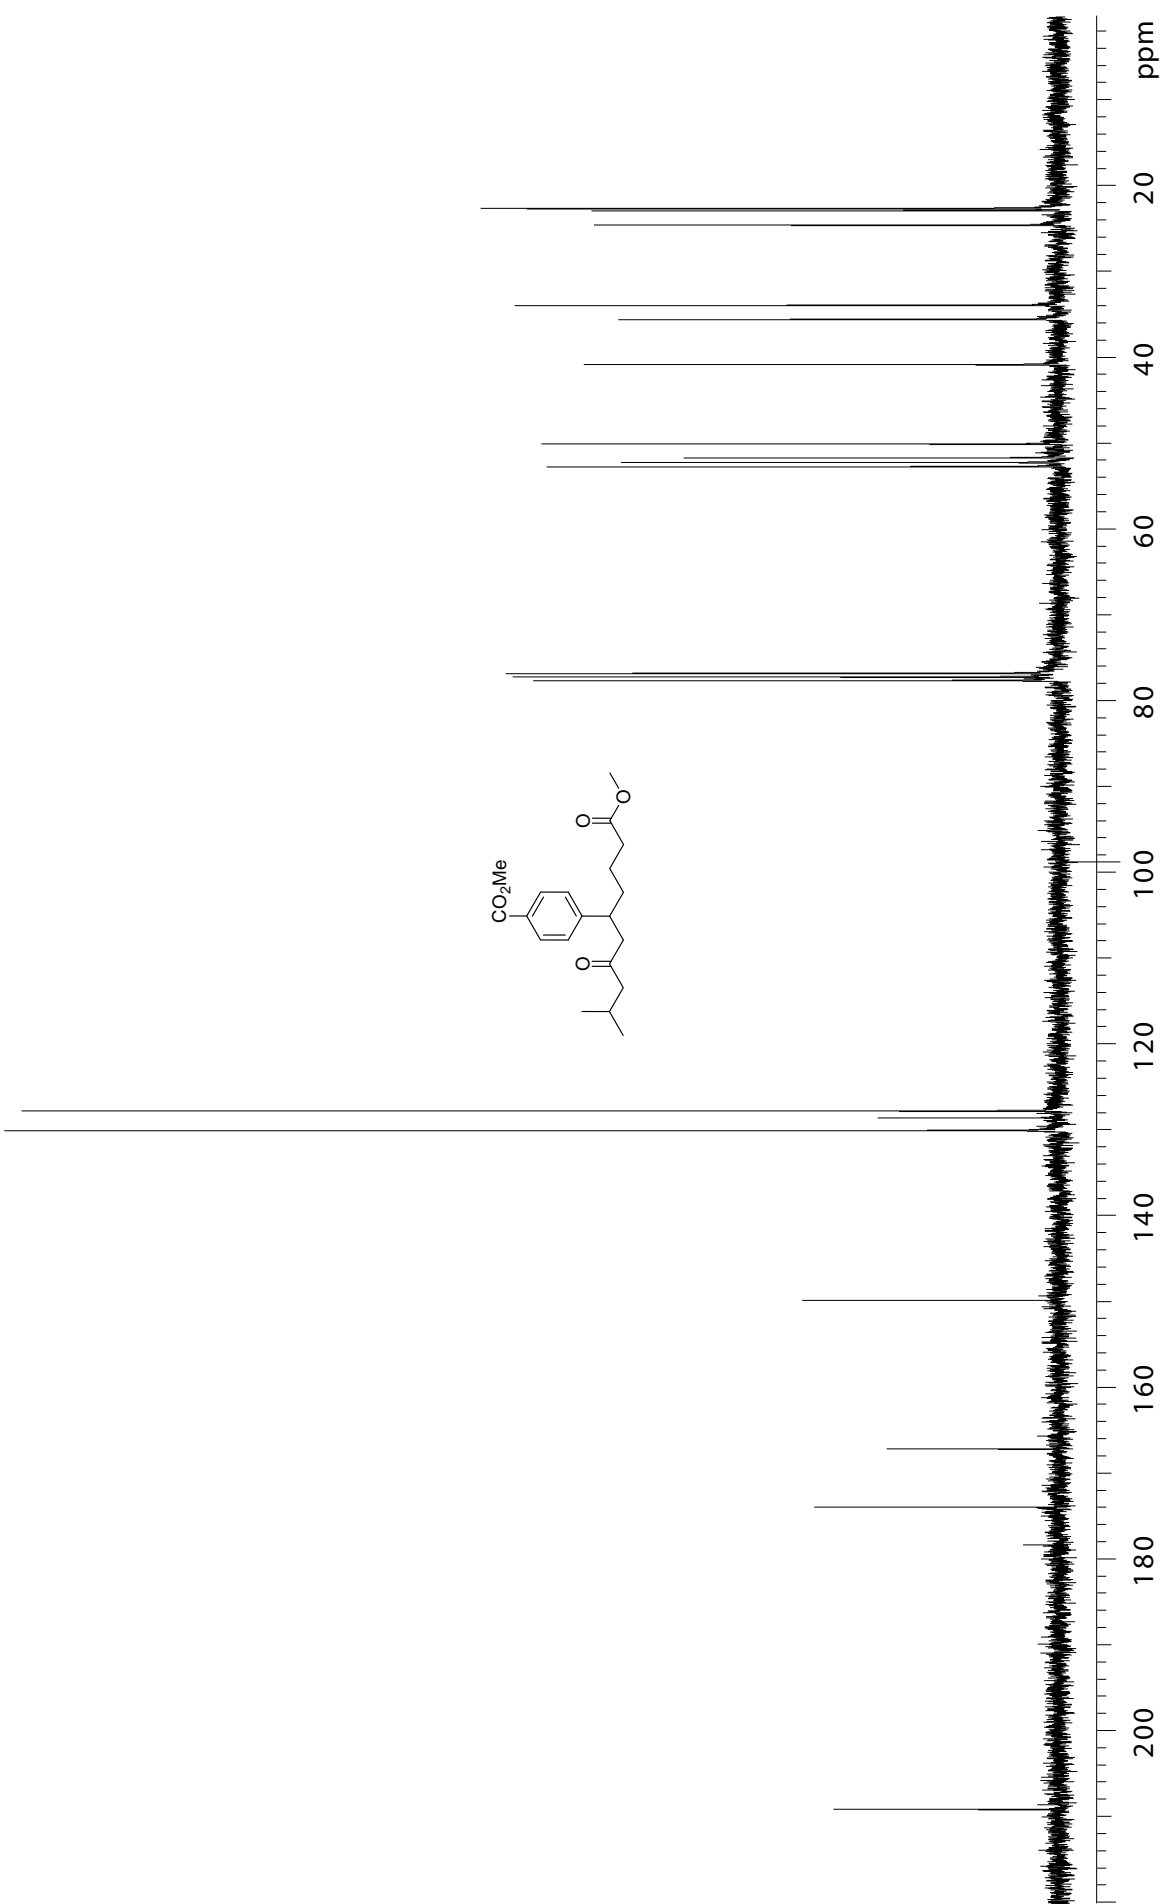



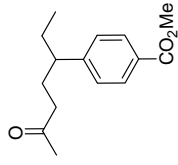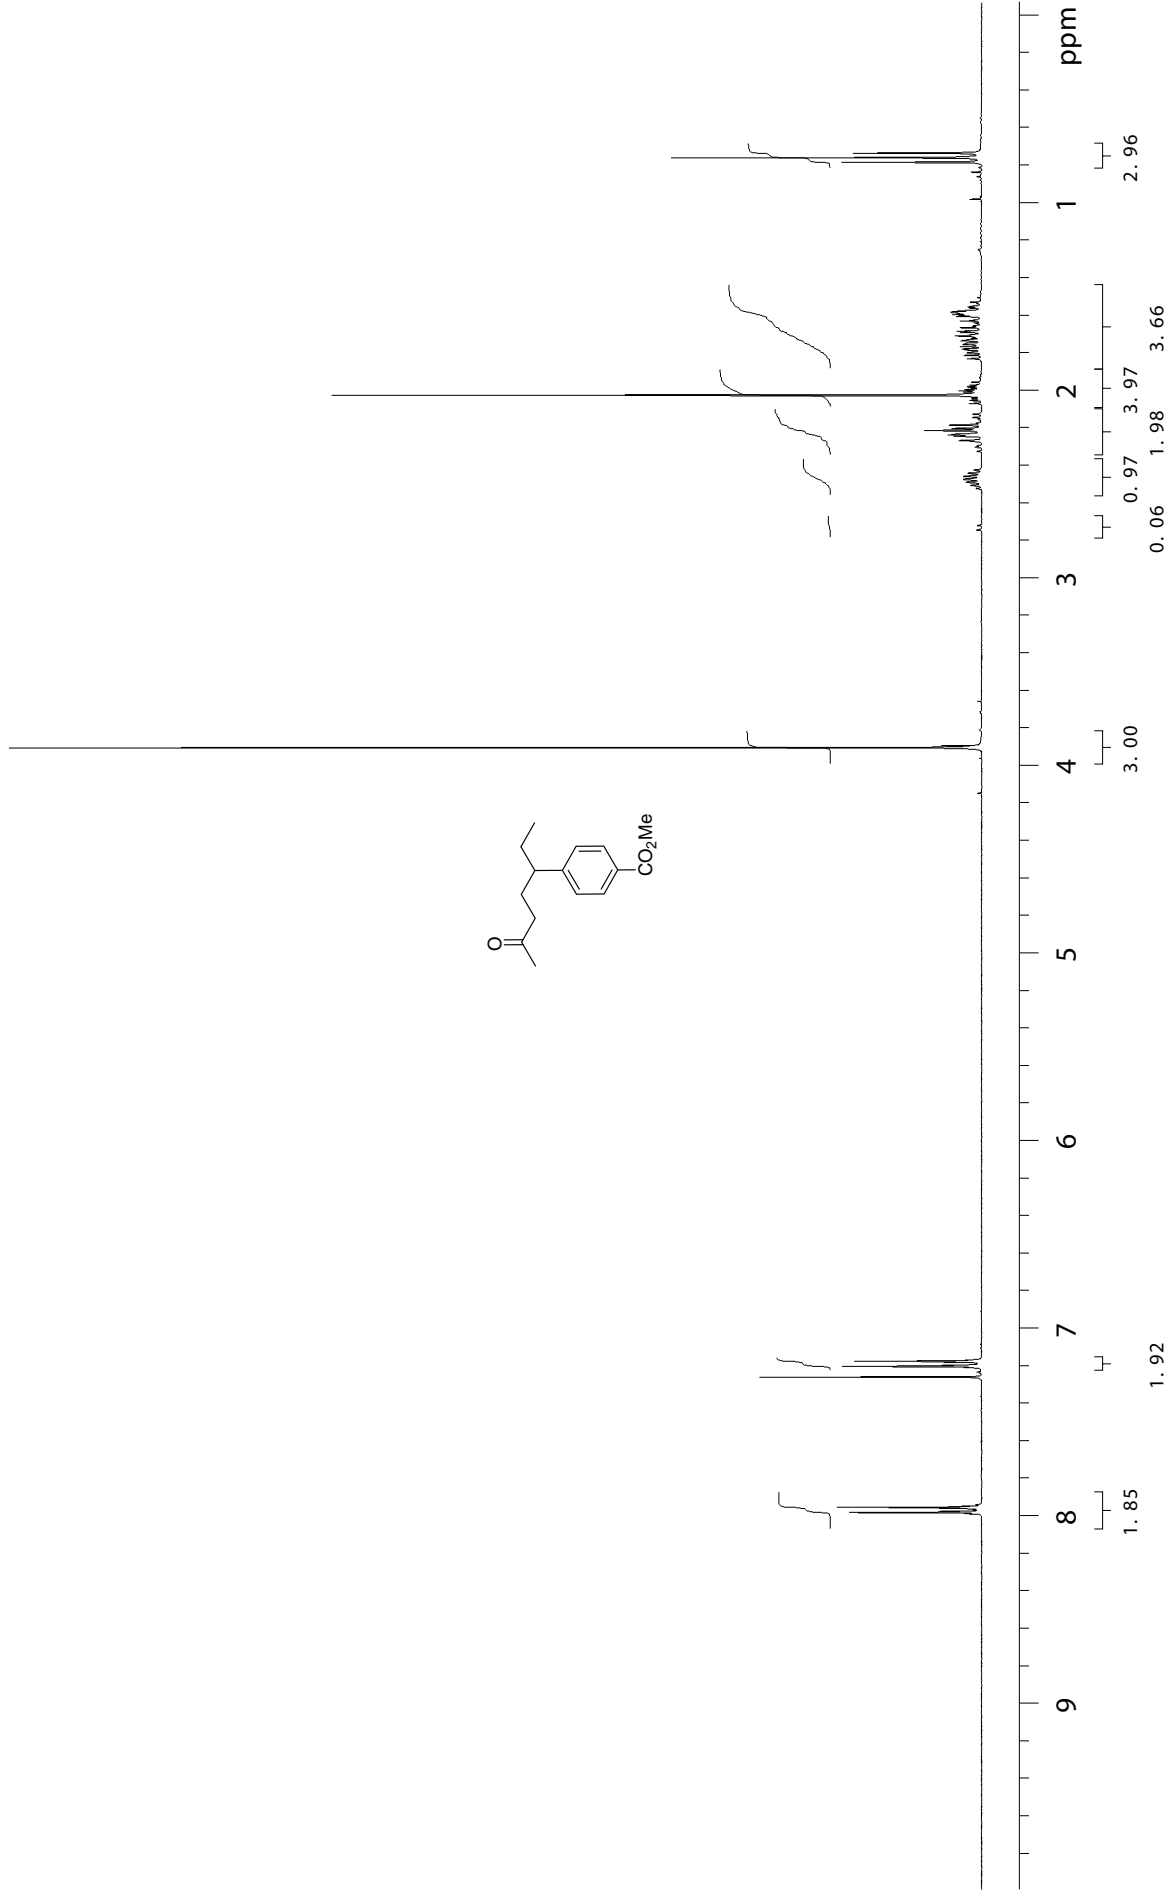

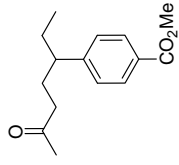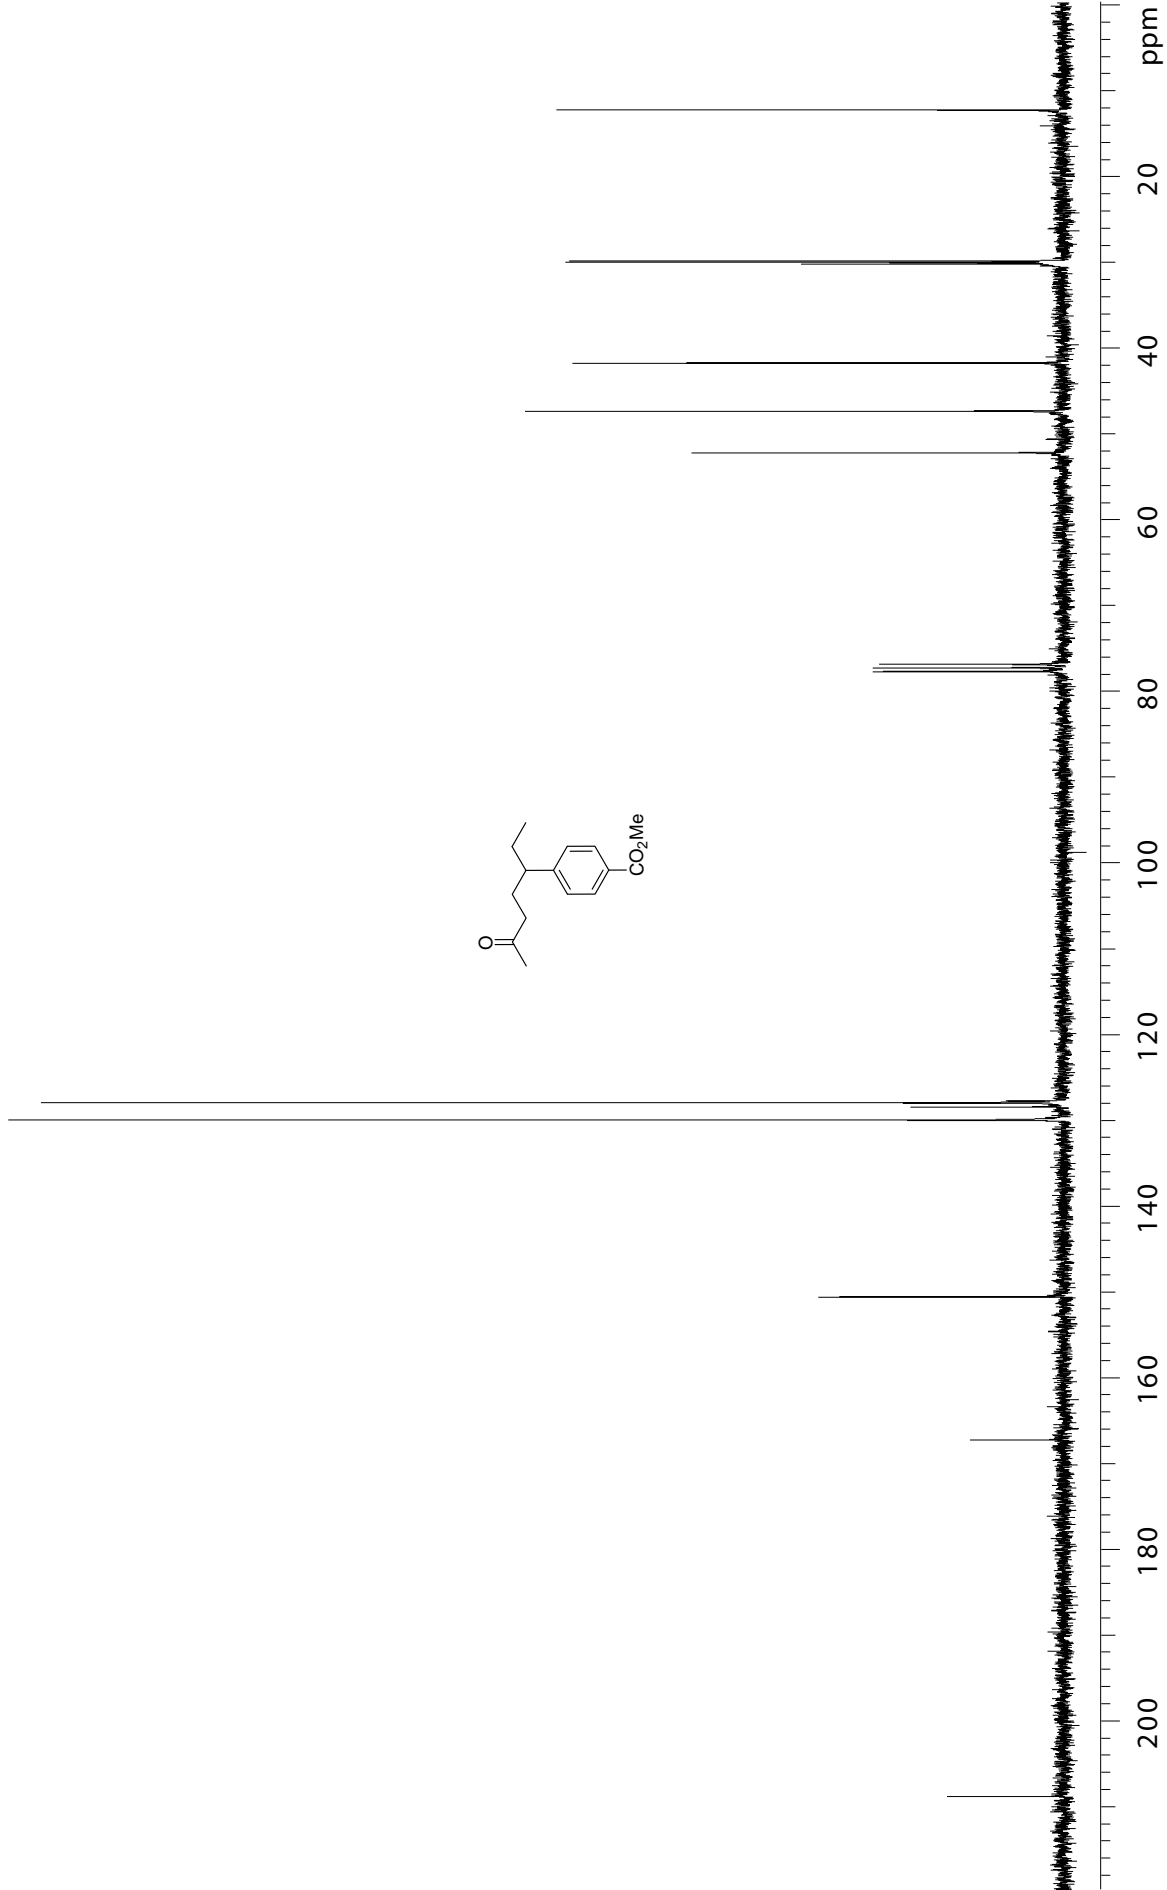

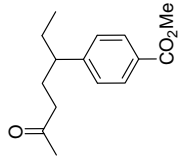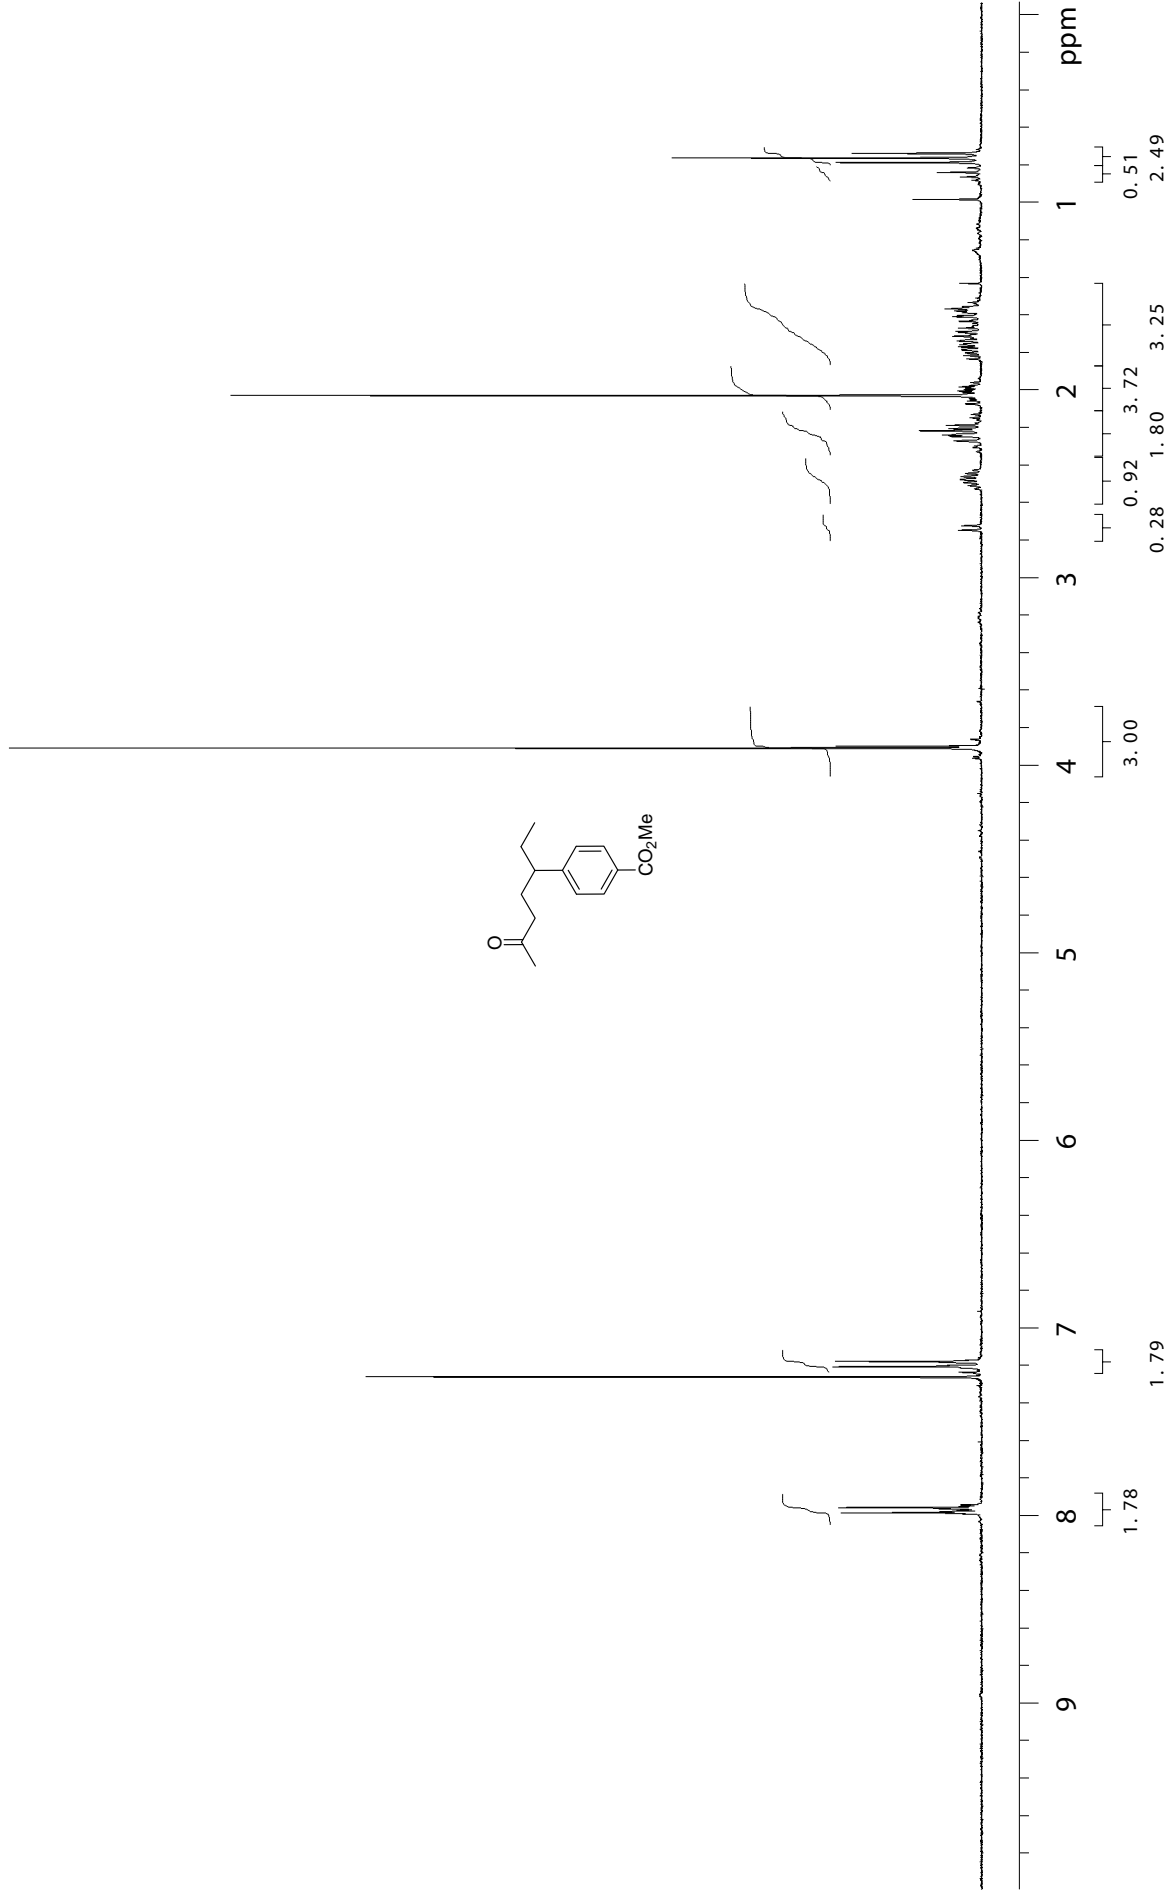

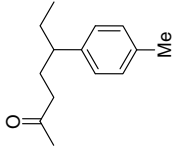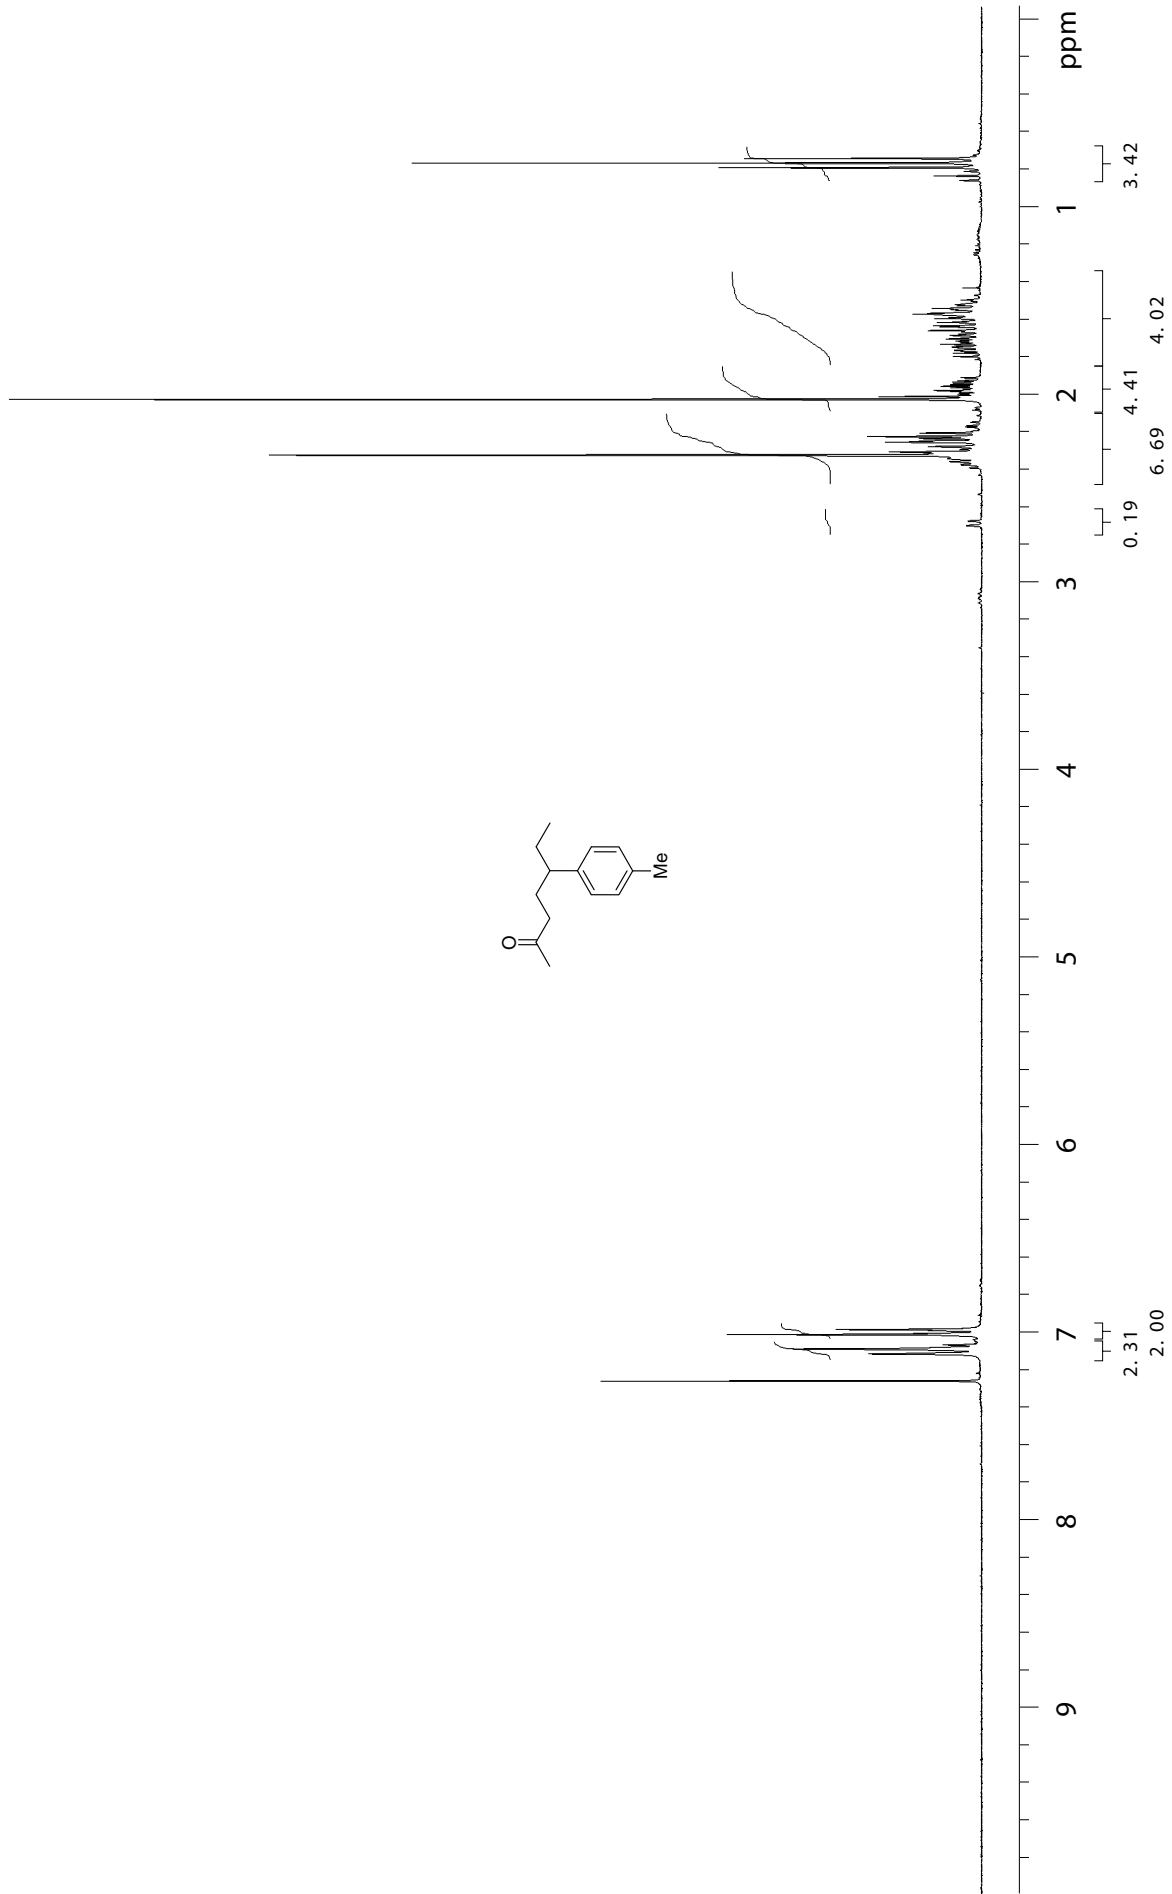

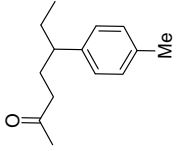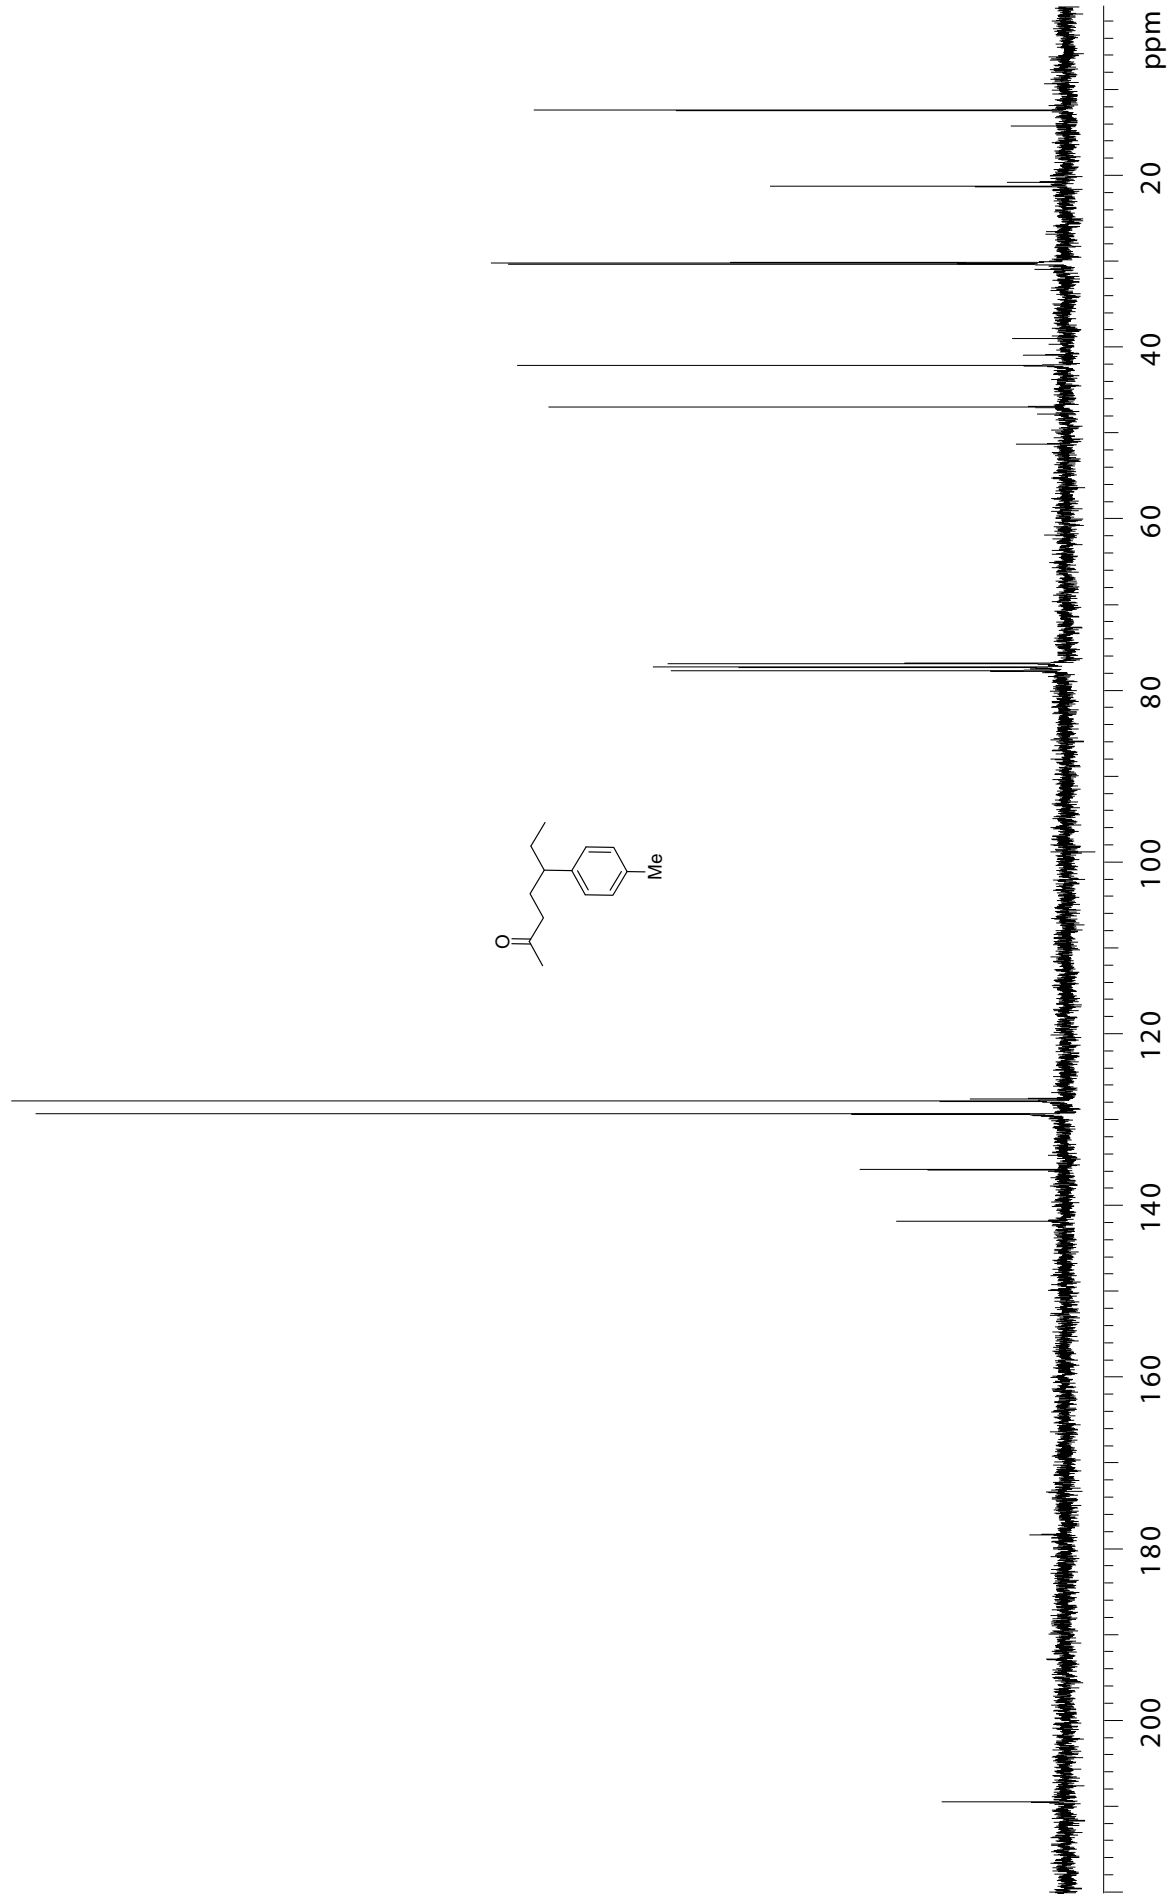

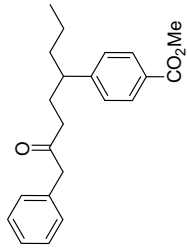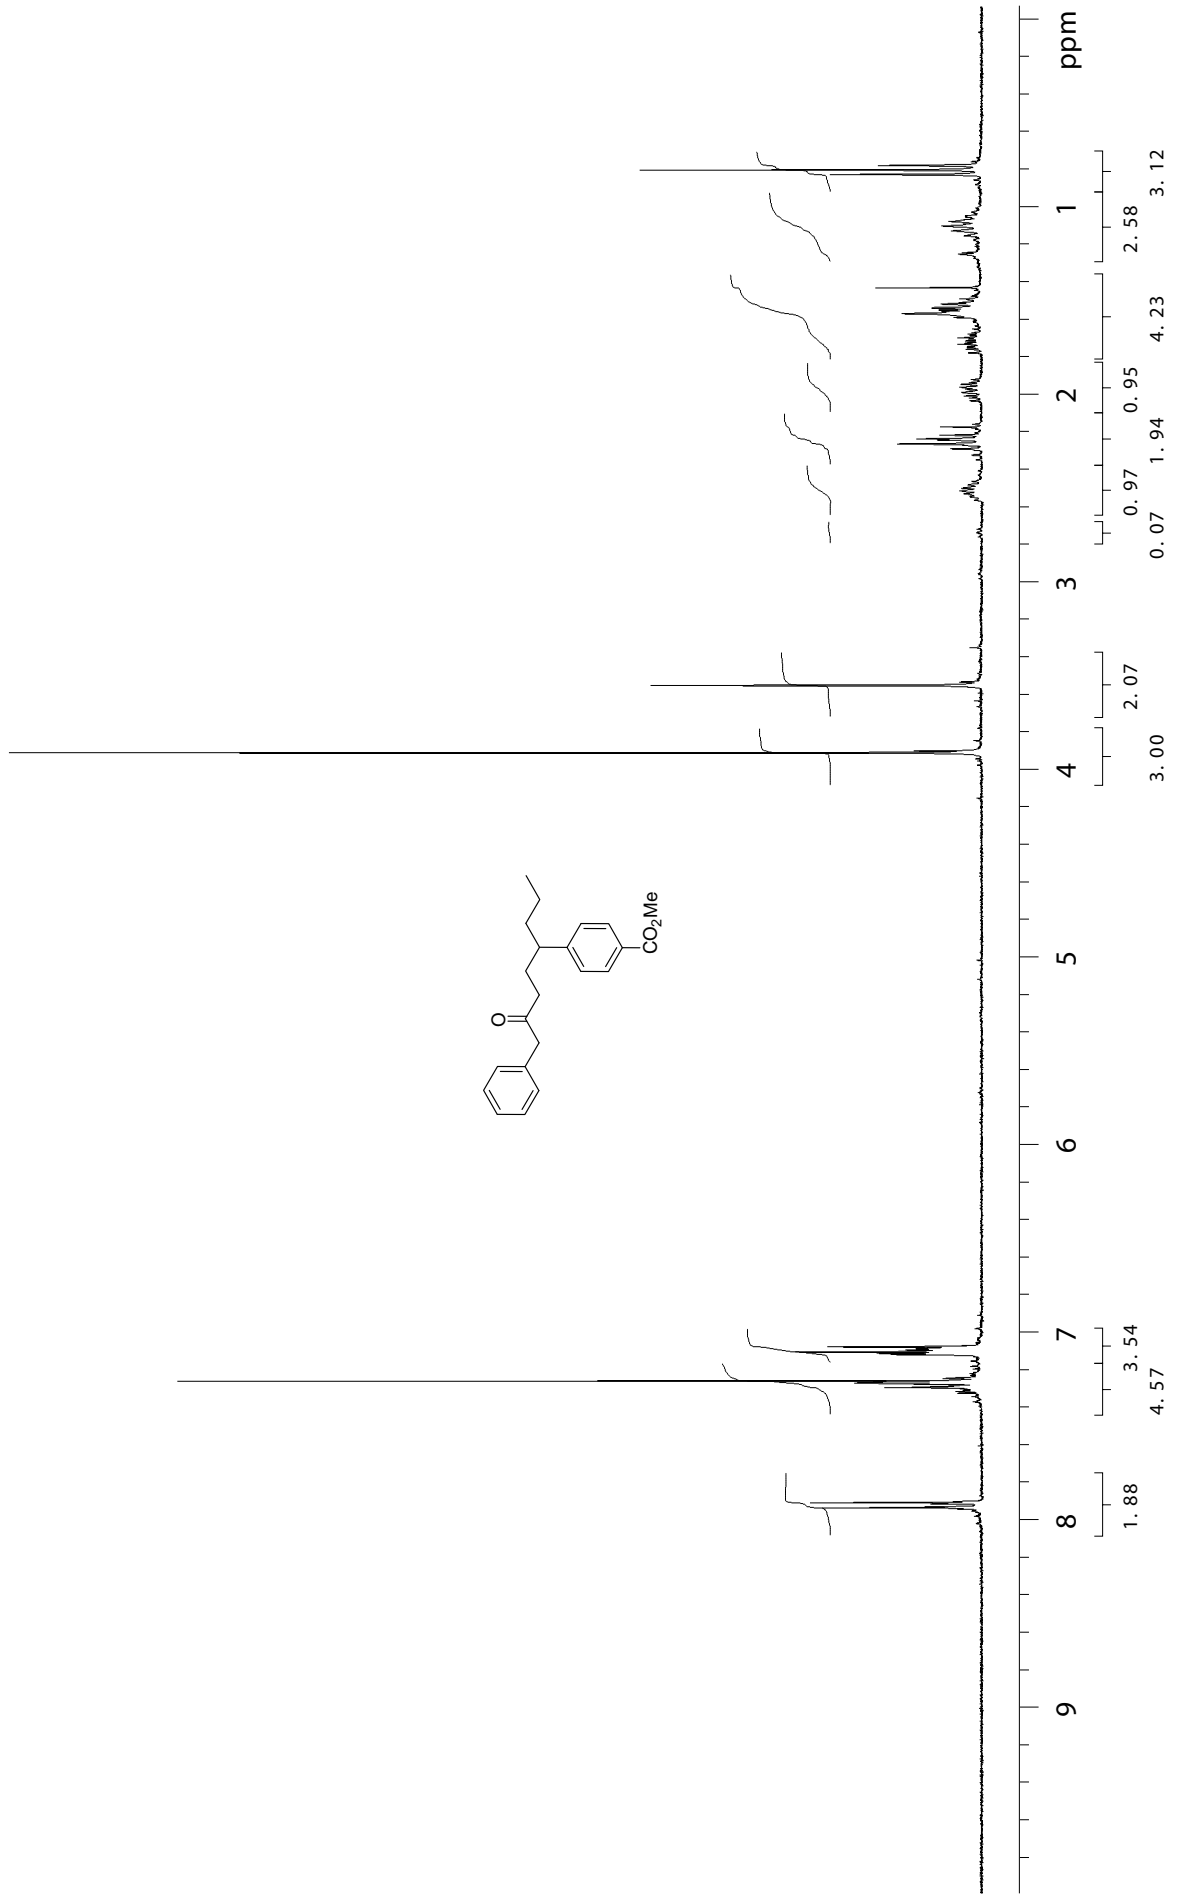

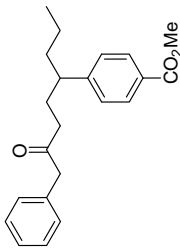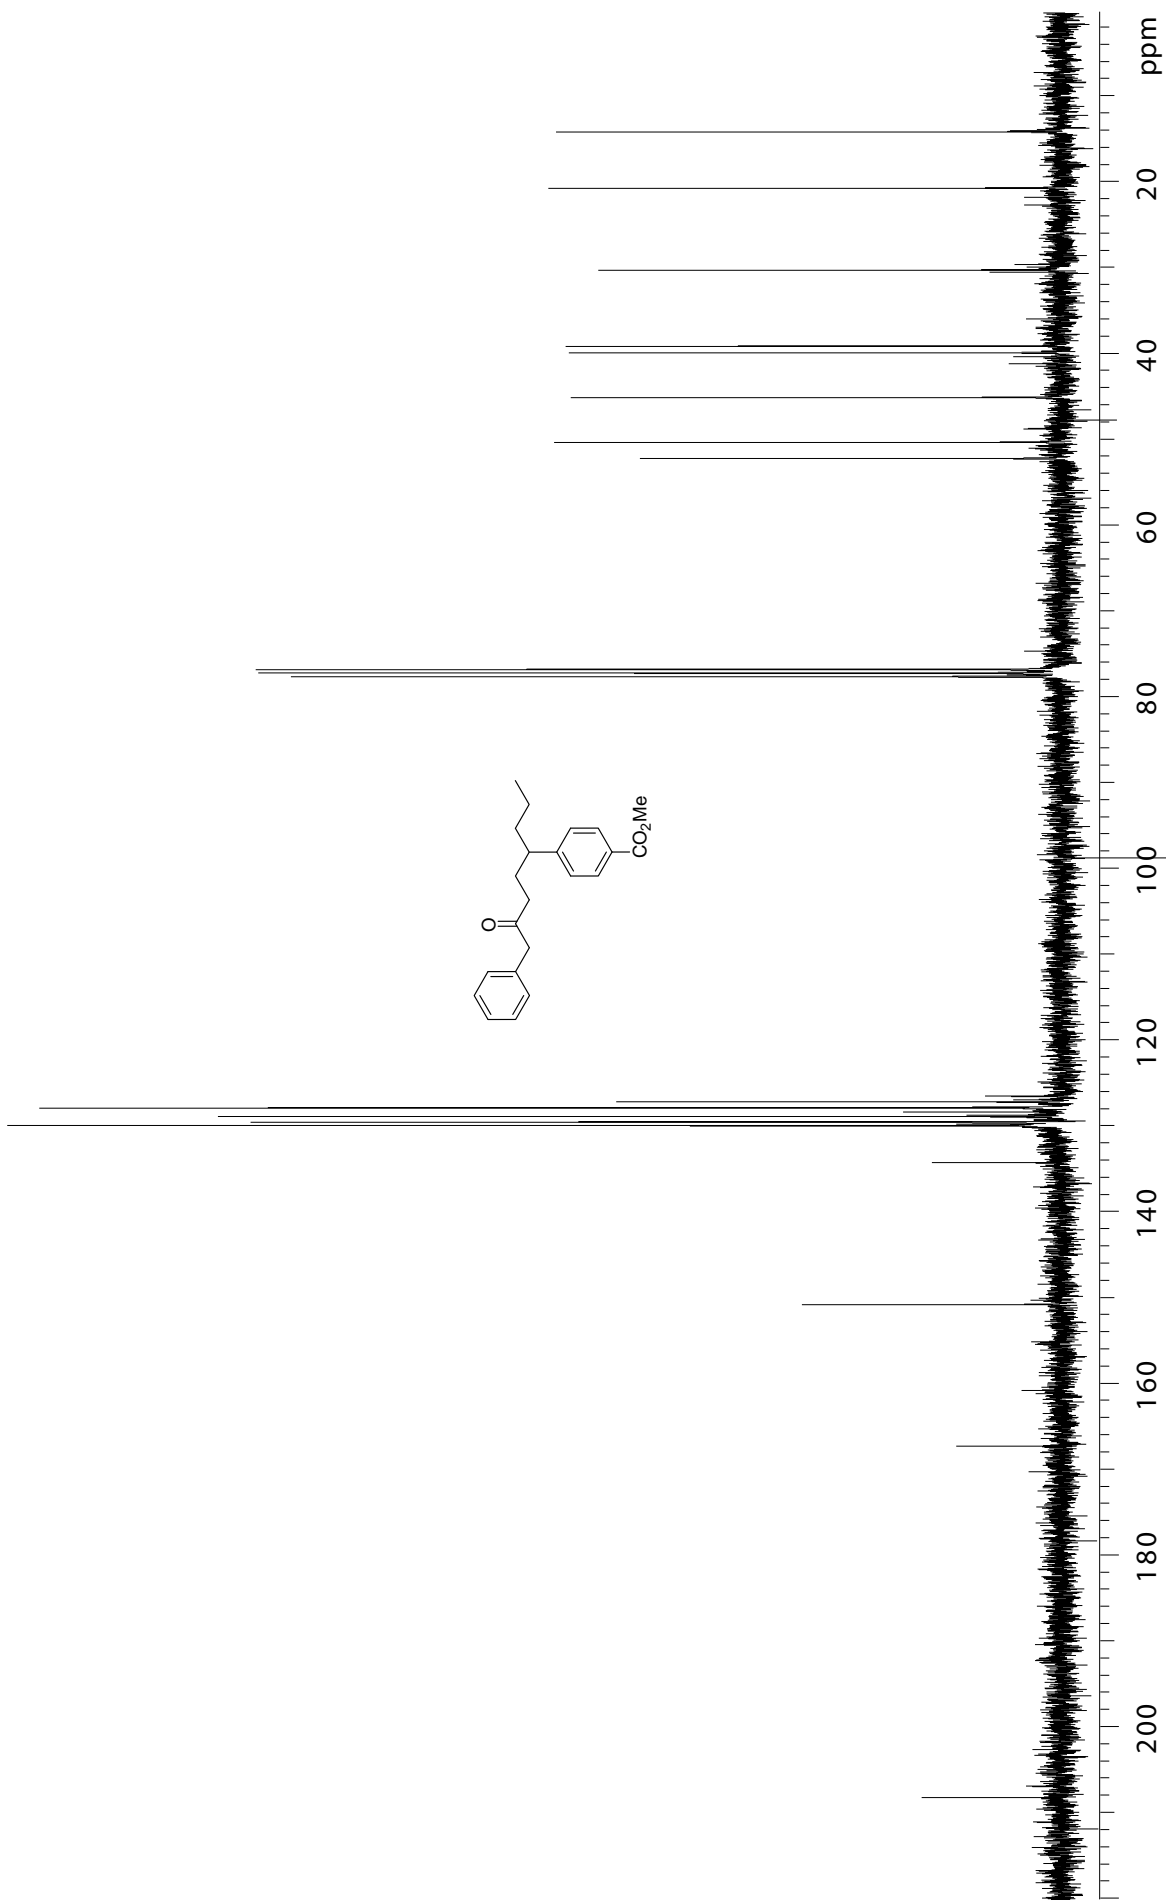

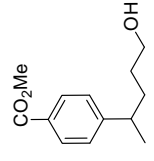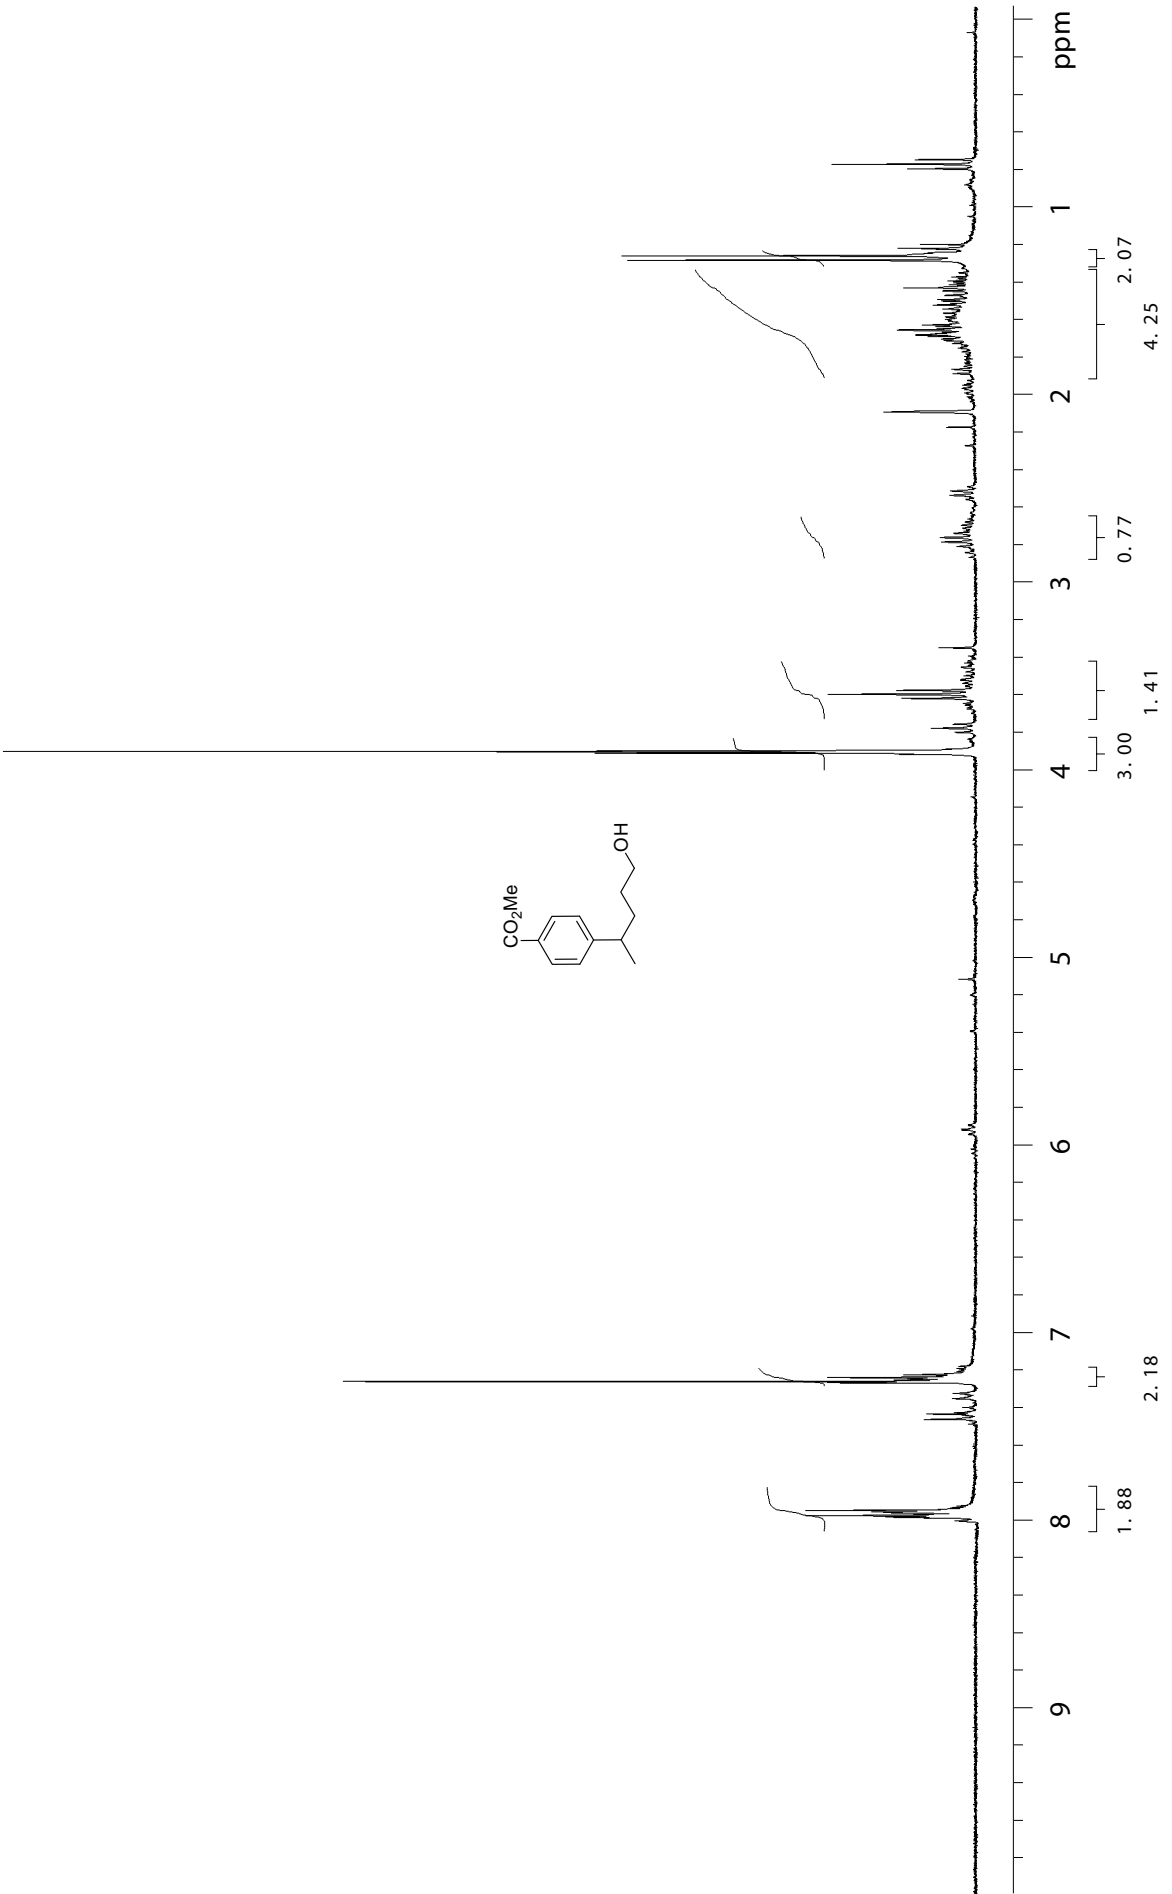



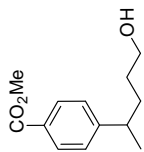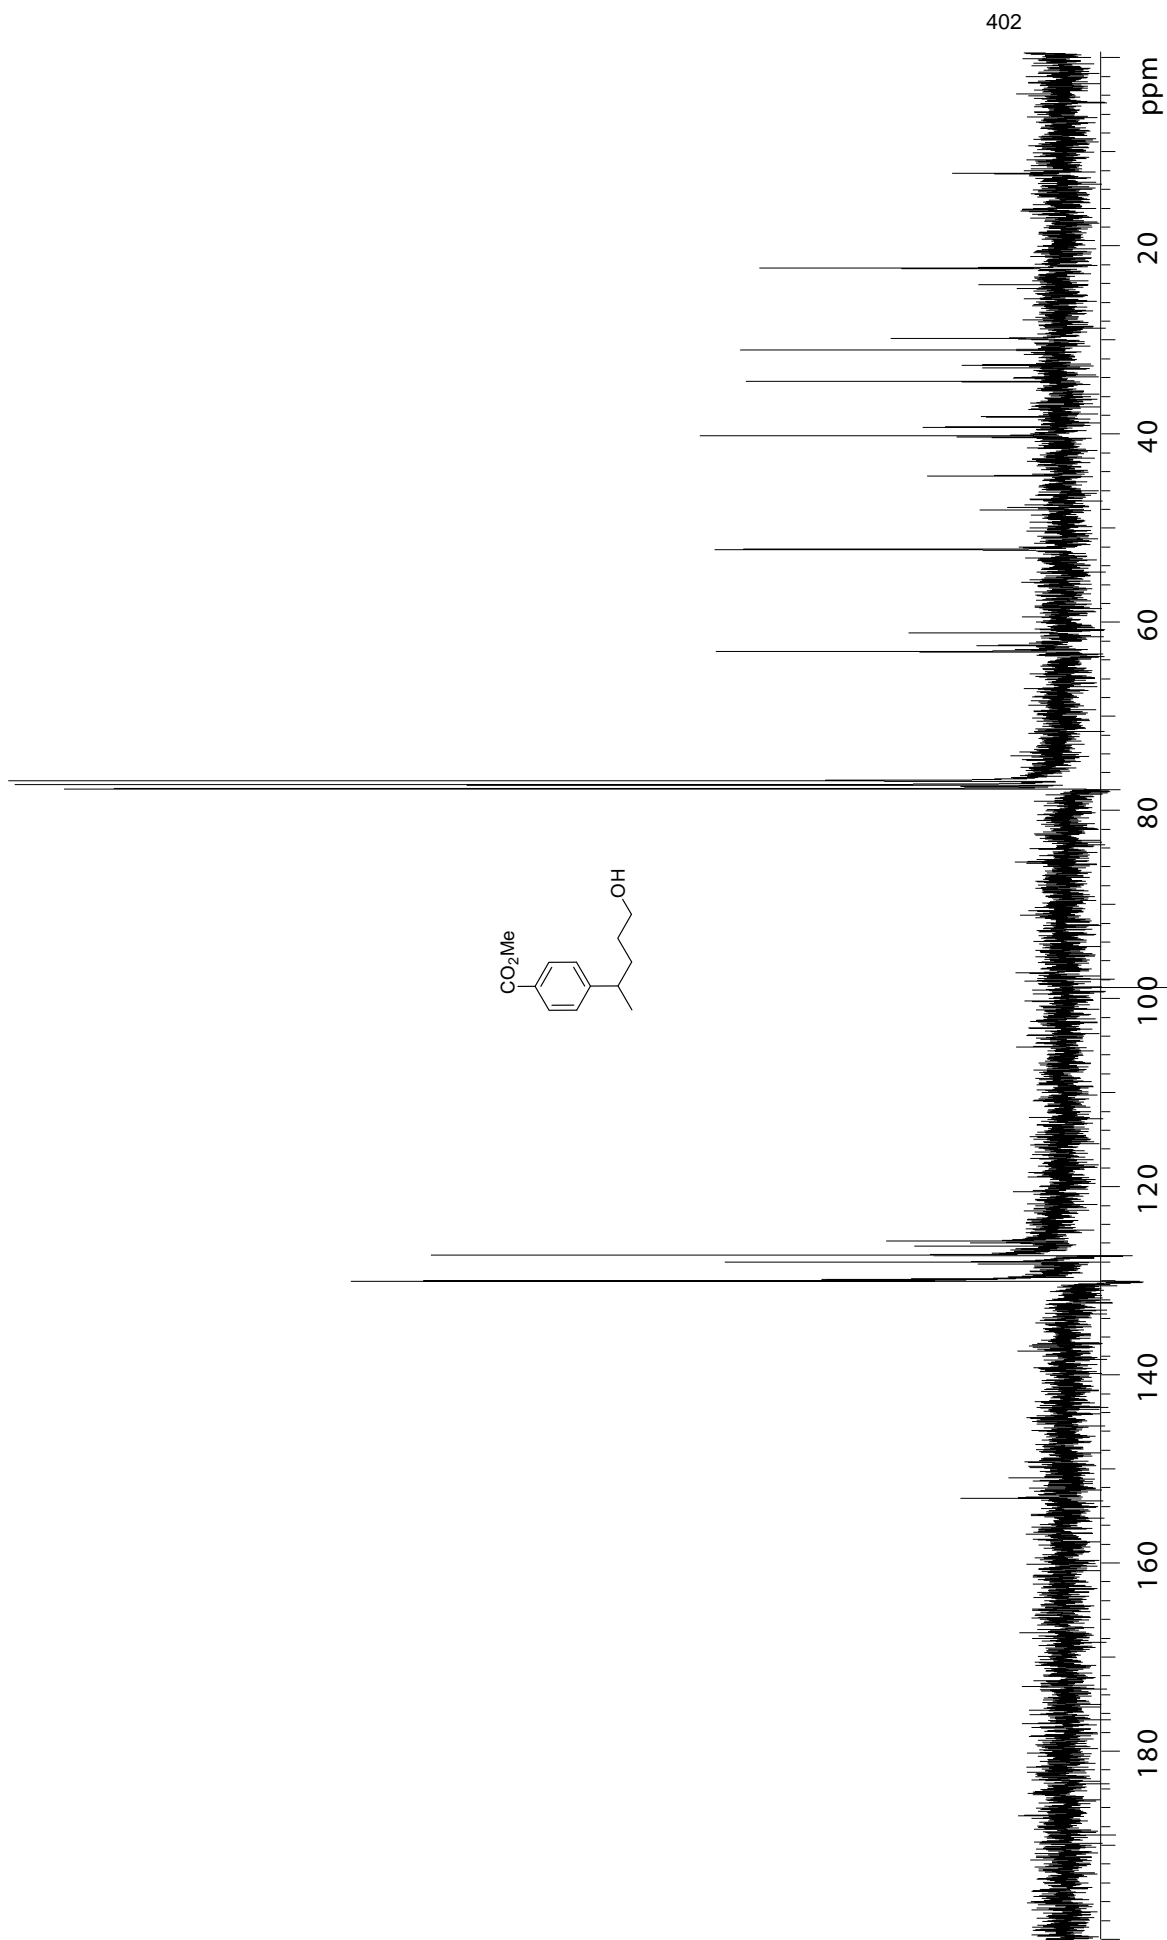

mei-03-2-OMe-H

Archive directory: /home/nmr/vnmr1/vnmr sys/dat a

File: mei-03-2-OMe-H

Pulse Sequence: s2pul

Solvent: CDCl3

Ambient temperature

File: mei-03-2-OMe-H

INOVA-500 "nmr - sun"

Relax. delay 1.000 sec

Pulse 46.7 degrees

Acq. time 4.000 sec

Wdth 4499.9 Hz

41 repetitions

OBSERVE H1, 300.0771288 MH

DATA PROCESSING

FT size 65536

Total time 27 hr, 49 min, 37 sec

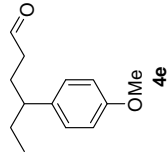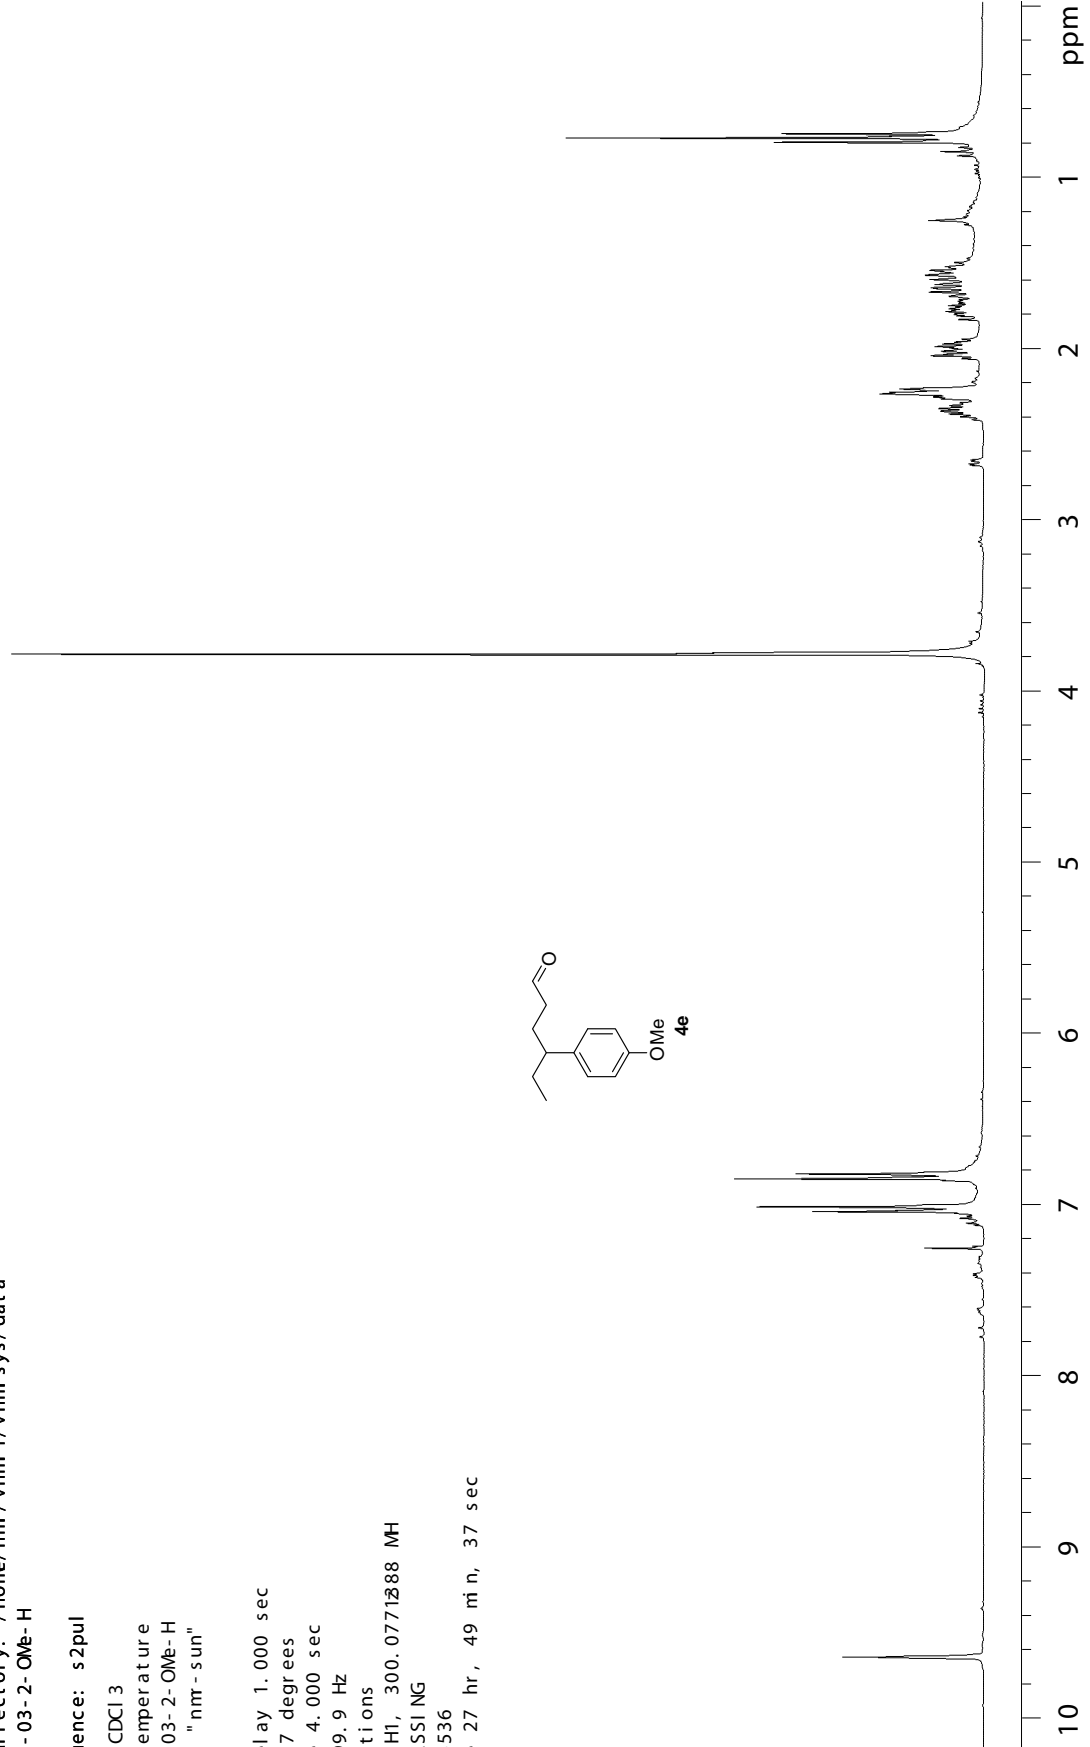

Pulse Sequence: s2pul

Solvent: CDCl3

Ambient temperature

File: mei-03-2-p-OMe-C

INOVA-500 "nmr-sun"

Pulse 41.7 degrees

Acq. time 1.815 sec

Wdth 16501.7 Hz

287 repetitions

OBSERVE C13, 75.4544385 MH

DECOUPLE H1, 300.07821256 MH

Power 37 dB

continuously on

WALTZ-16 modulated

DATA PROCESSING

Line broadening 1.0 Hz

FT size 65536

Total time 10 hr, 7 min, 58 sec

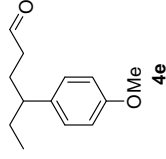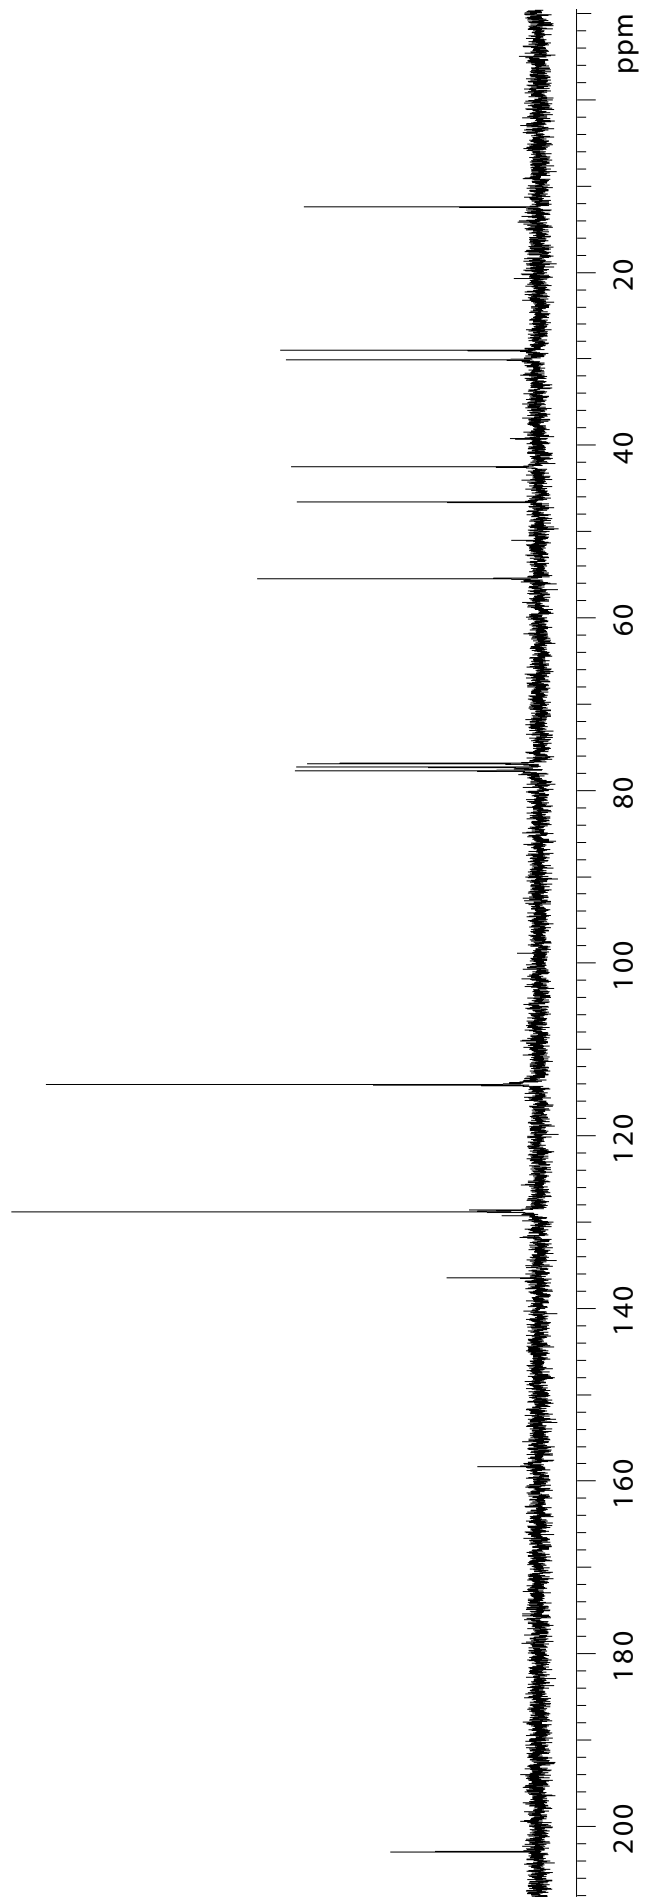

mei-3-2-ol-2

Archive directory: /home/nmr/vnmr1/vnmr sys/dat a

File: mei-03-2-ol-pure-H

Pulse Sequence: s2pul

Solvent: CDCl3

Ambient temperature

File: mei-03-2-ol-pure-H

INOVA-500 "nmr-sun"

Relax. delay 1.000 sec

Pulse 46.7 degrees

Acq. time 4.000 sec

Wdth 4499.9 Hz

37 repetitions

OBSERVE H1, 300.0771875 MH

DATA PROCESSING

FT size 65536

Total time 2 hr, 46 min, 57 sec

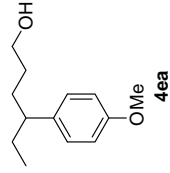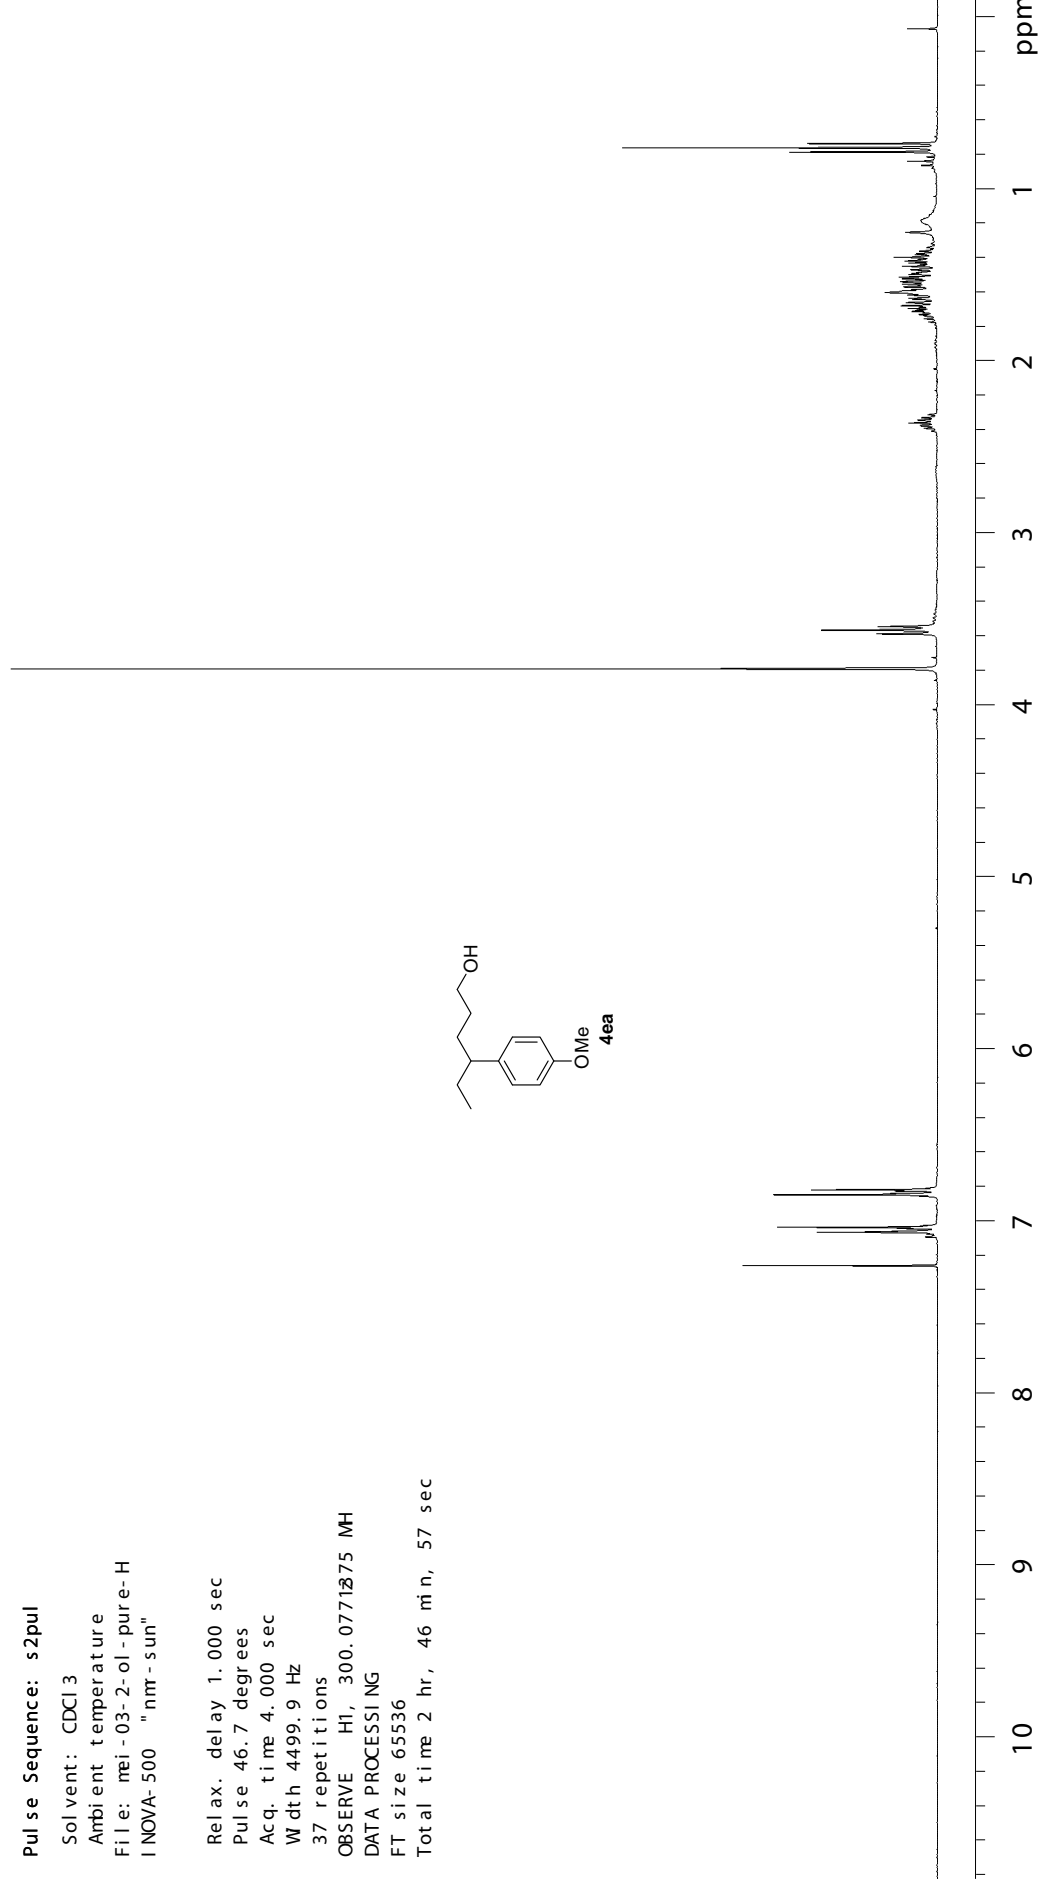

mei-03-2-ol-C

Pulse Sequence: s2pul

Solvent: CDCl3

Ambient temperature

File: mei-03-2-ol-C

INOVA-500 "nmr-sun"

Pulse 41.7 degrees

Acq. time 1.815 sec

Wdth 16501.7 Hz

989 repetitions

OBSERVE C13, 75.4544571 MHz

DECOUPLE H1, 300.0782156 MHz

Power 37 dB

continuously on

WALTZ-16 modulated

DATA PROCESSING

Line broadening 1.0 Hz

FT size 65536

Total time 101 hr, 19 min, 47 sec

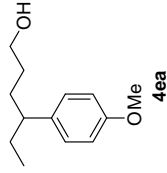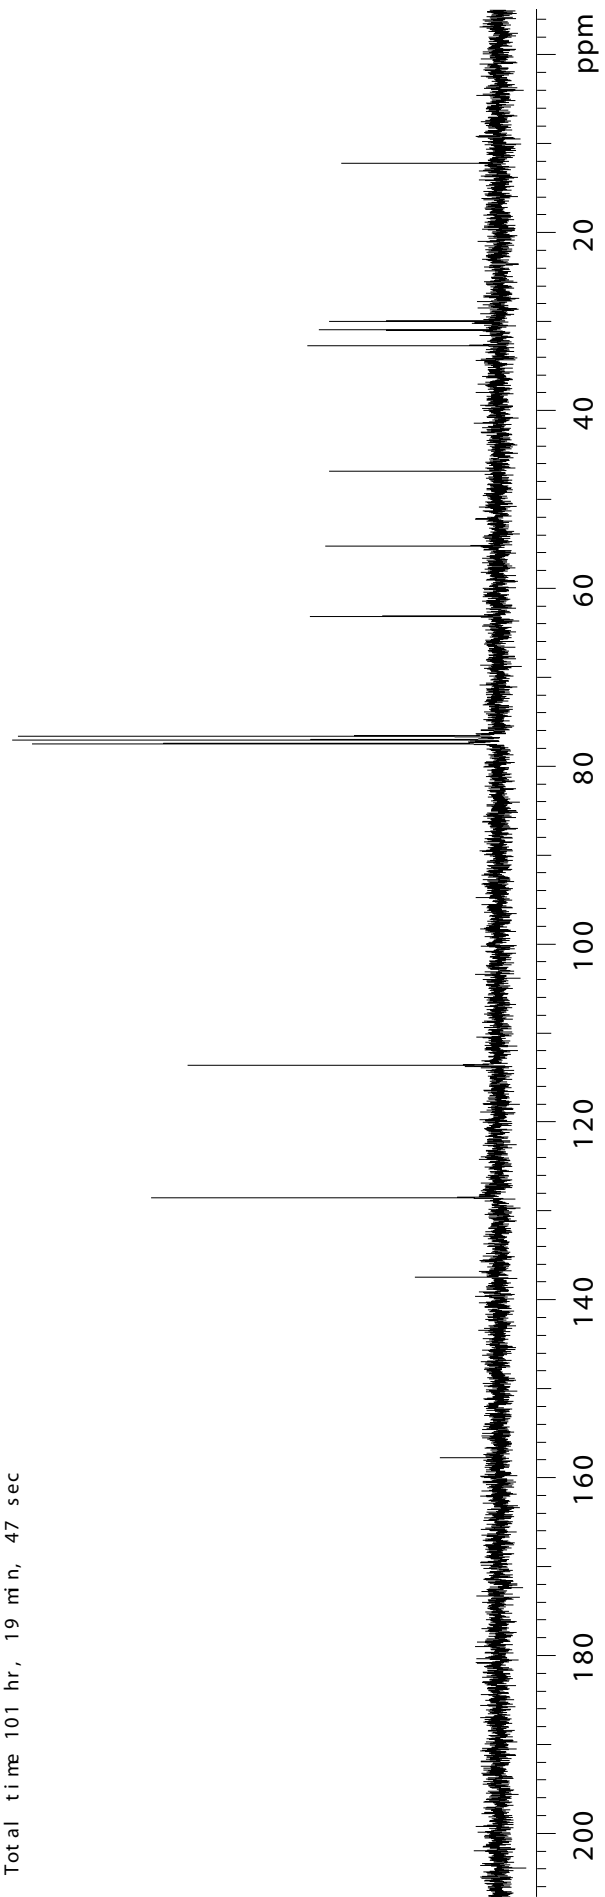

mei-03-4-acetyl-H

Archive directory: /home/nmr/vnmr1/vnmr sys/dat a

File: mei-03-4-acetyl-H

Pulse Sequence: s2pul

Solvent: CDCl3

Ambient temperature

File: mei-03-4-acetyl-H

INOVA-500 "nmr-sun"

Relax. delay 1.000 sec

Pulse 46.7 degrees

Acq. time 4.000 sec

Width 4499.9 Hz

83 repetitions

OBSERVE H1, 300.0771870 MHz

DATA PROCESSING

FT size 65536

Total time 27 hr, 49 min, 37 sec

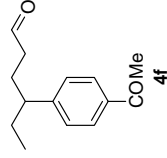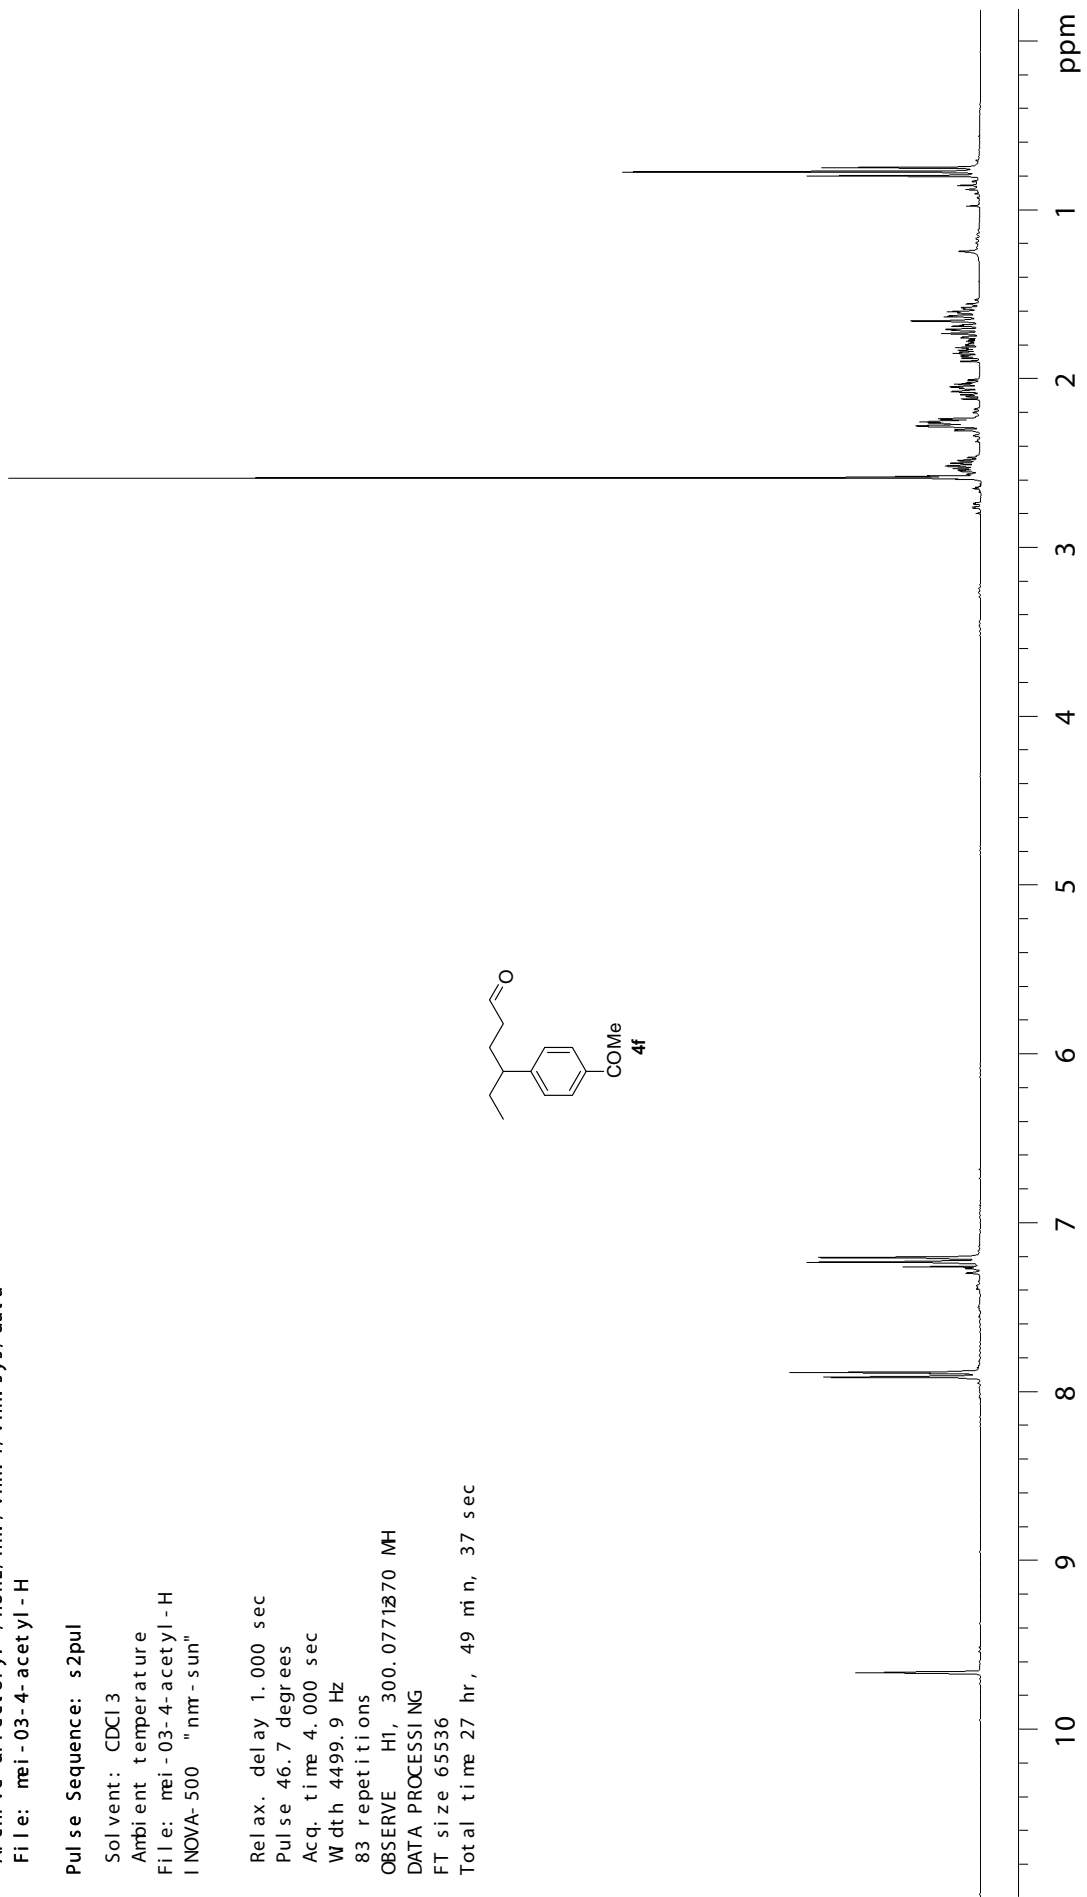

Pulse Sequence: s2pul

Solvent: CDCl<sub>3</sub>

Ambient temperature

File: mei-03-4-acetyl-C

INOVA-500 "nmr-sun"

Pulse 41.7 degrees

Acq. time 1.815 sec

Wdth 16501.7 Hz

1758 repetitions

OBSERVE C13, 75.4544581 MHz

DECOUPLE H1, 300.0782156 MHz

Power 37 dB

continuously on

WALTZ-16 modulated

DATA PROCESSING

Line broadening 1.0 Hz

FT size 65536

Total time 1 hr, 47 sec

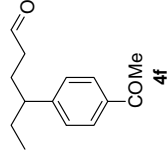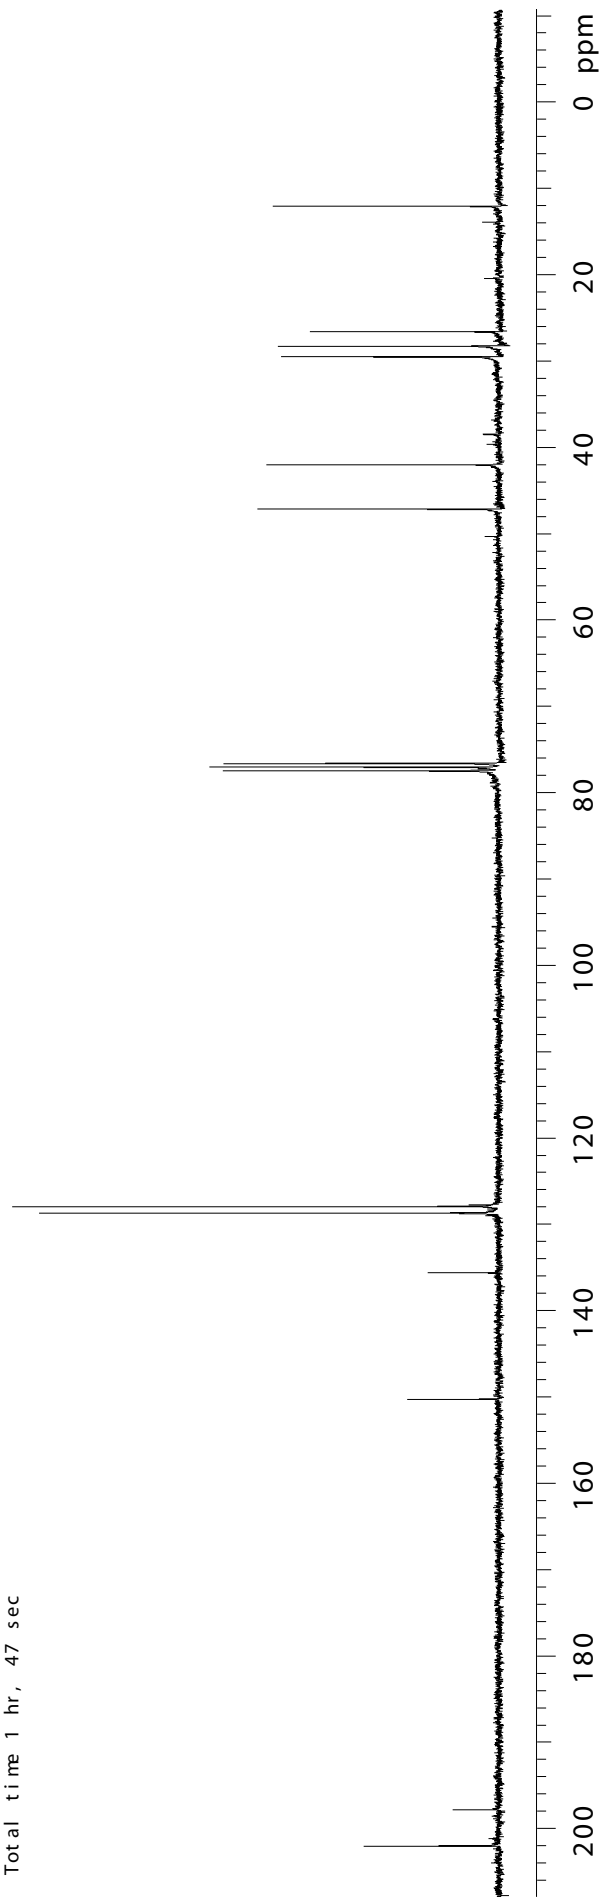

mei-03-4-acetyl-ol-H

Archive directory: /home/nmr/vnmr1/vnmr sys/dat a

File: mei-03-4-acetyl-ol-H

Pulse Sequence: s2pul

Solvent: CDCl3

Ambient temperature

File: mei-03-4-acetyl-ol-H

INOVA-500 "nmr-sun"

Relax. delay 1.000 sec

Pulse 46.7 degrees

Acq. time 4.000 sec

Width 4499.9 Hz

31 repetitions

OBSERVE H1, 300.0771829 MHz

DATA PROCESSING

FT size 65536

Total time 2 hr, 46 min, 57 sec

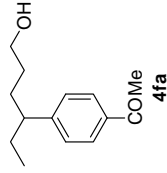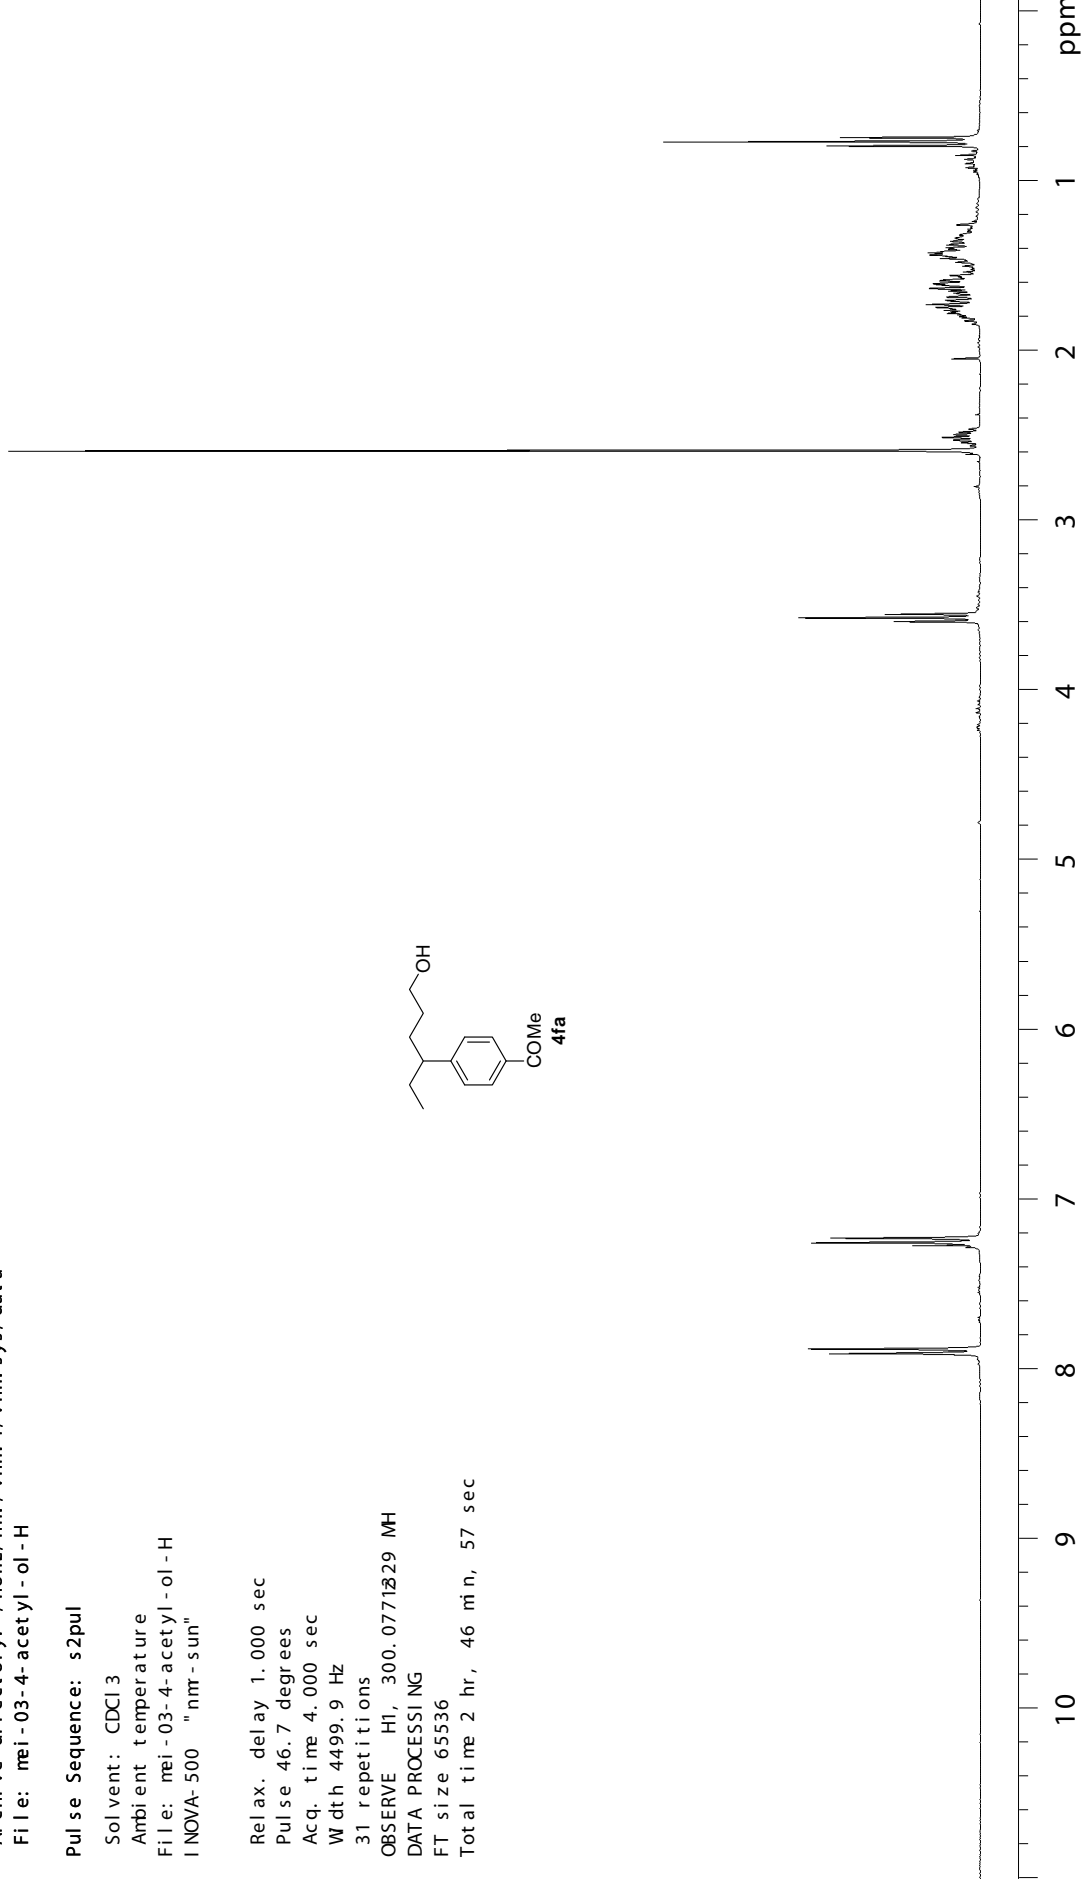



Pulse Sequence: s2pul

Solvent: CDCl<sub>3</sub>  
Ambient temperature  
File: mei-03-4-acetyl-ol-C  
INOVA-500 "nmr-sun"

Pulse 41.7 degrees  
Acq. time 1.815 sec  
Wdth 16501.7 Hz  
394 repetitions  
OBSERVE C13, 75.4544581 MH  
DECOUPLE H1, 300.07821256 MH  
Power 37 dB  
continuously on  
WALTZ-16 modulated  
DATA PROCESSING  
Line broadening 1.0 Hz  
FT size 65536  
Total time 1 hr, 47 sec

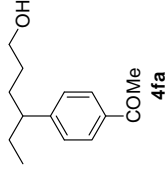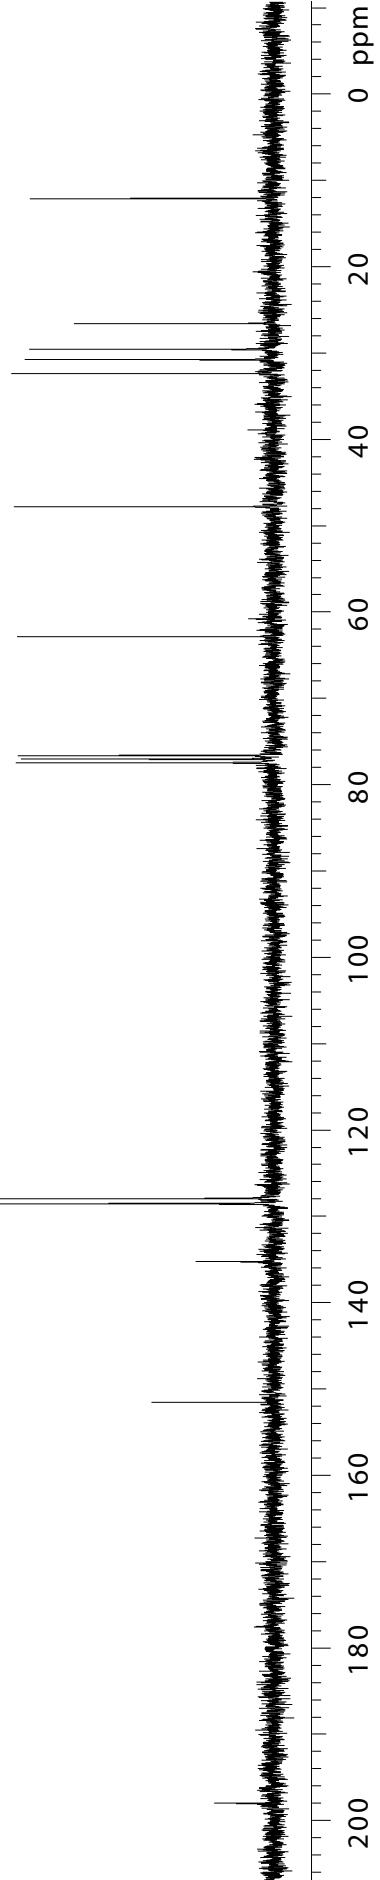

mei-02-184-ester-H

Archive directory: /home/nmr/vnmr1/vnmr sys/dat a

File: mei-02-184-ester-H

Pulse Sequence: s2pul

Solvent: CDCl3

Ambient temperature

File: mei-02-184-ester-H

INOVA-500 "nmr-sun"

Relax. delay 1.000 sec

Pulse 46.7 degrees

Acq. time 4.000 sec

Width 4499.9 Hz

44 repetitions

OBSERVE H1, 300.0771871 MH

DATA PROCESSING

FT size 65536

Total time 2 hr, 46 min, 57 sec

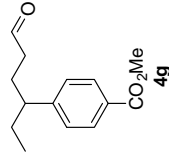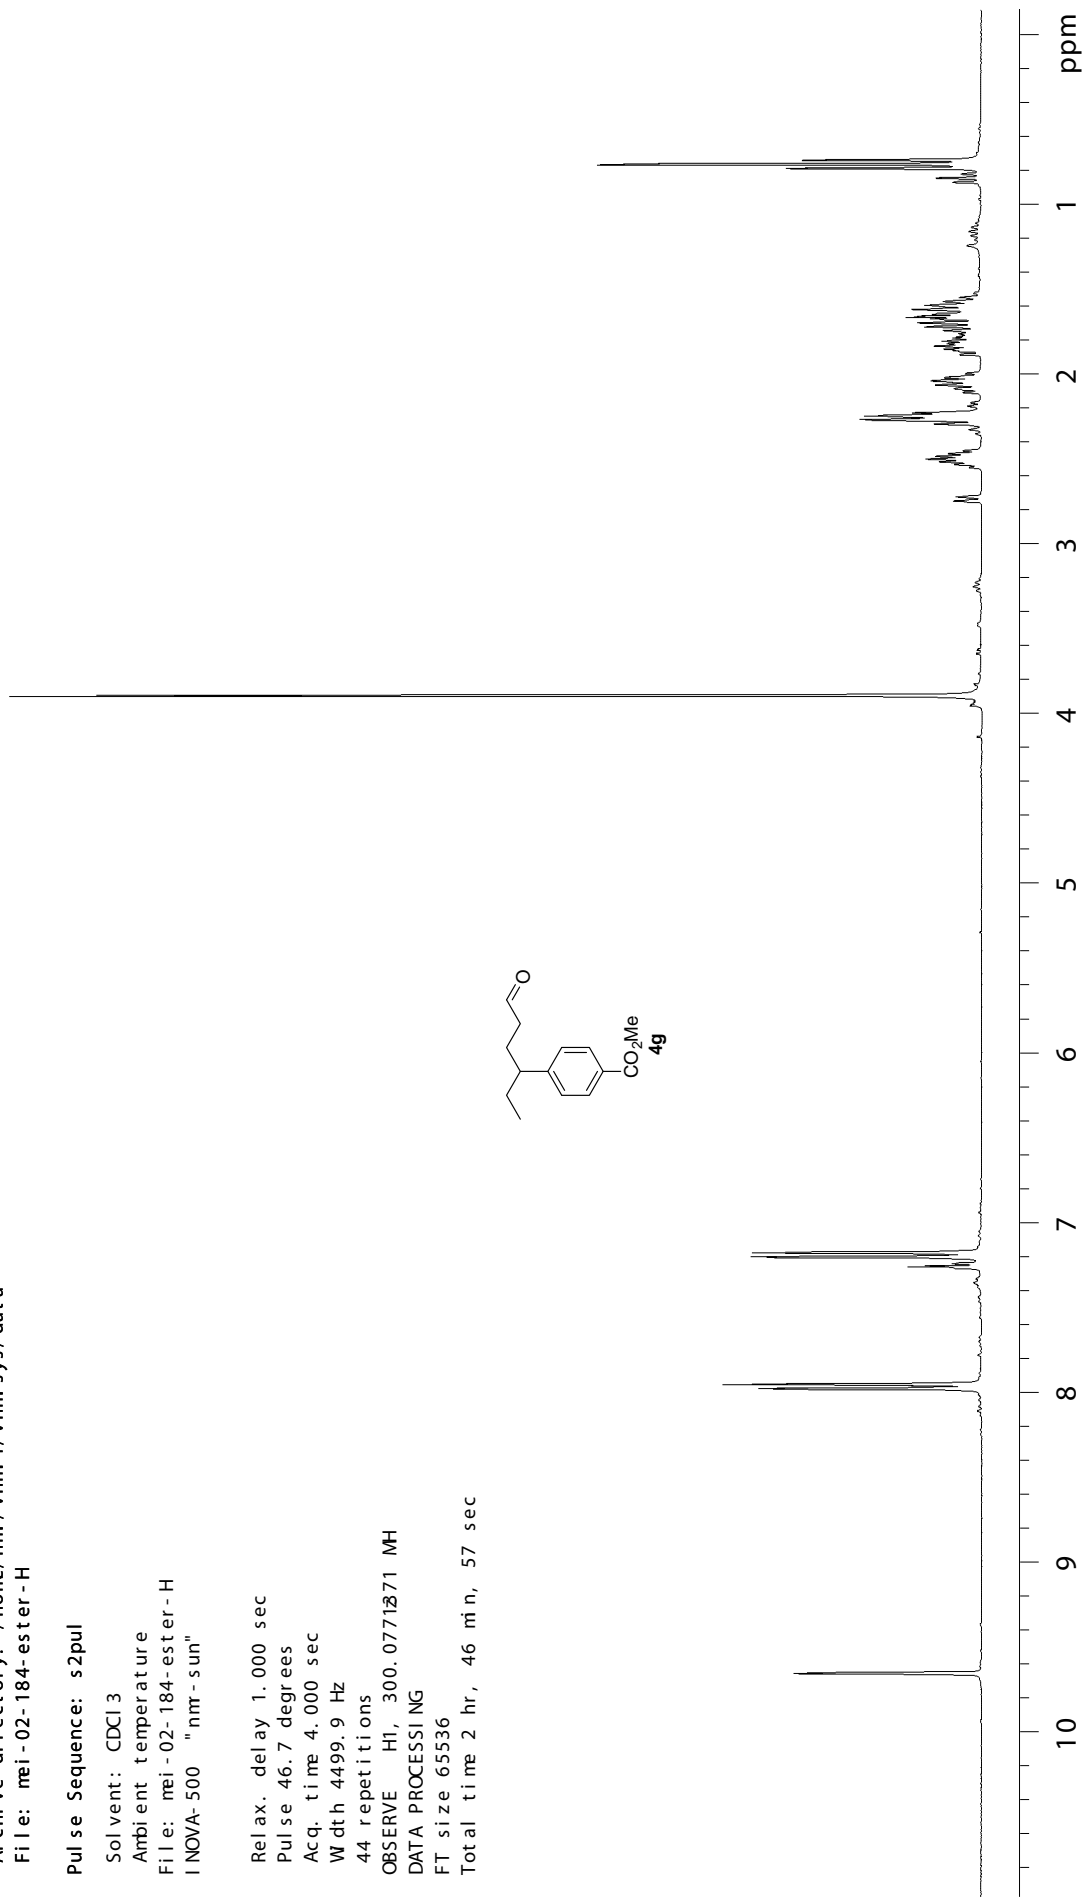

mei-02-184-ester-C

Pulse Sequence: s2pul

Solvent: CDCl3

Ambient temperature

File: mei-02-184-ester-C

INOVA-500 "nmr-sun"

Pulse 41.7 degrees

Acq. time 1.815 sec

Wdth 16501.7 Hz

499 repetitions

OBSERVE C13, 75.4544581 MH

DECOUPLE H1, 300.0782156 MH

Power 37 dB

continuously on

WALTZ-16 modulated

DATA PROCESSING

Line broadening 1.0 Hz

FT size 65536

Total time 1 hr, 47 sec

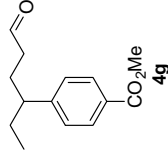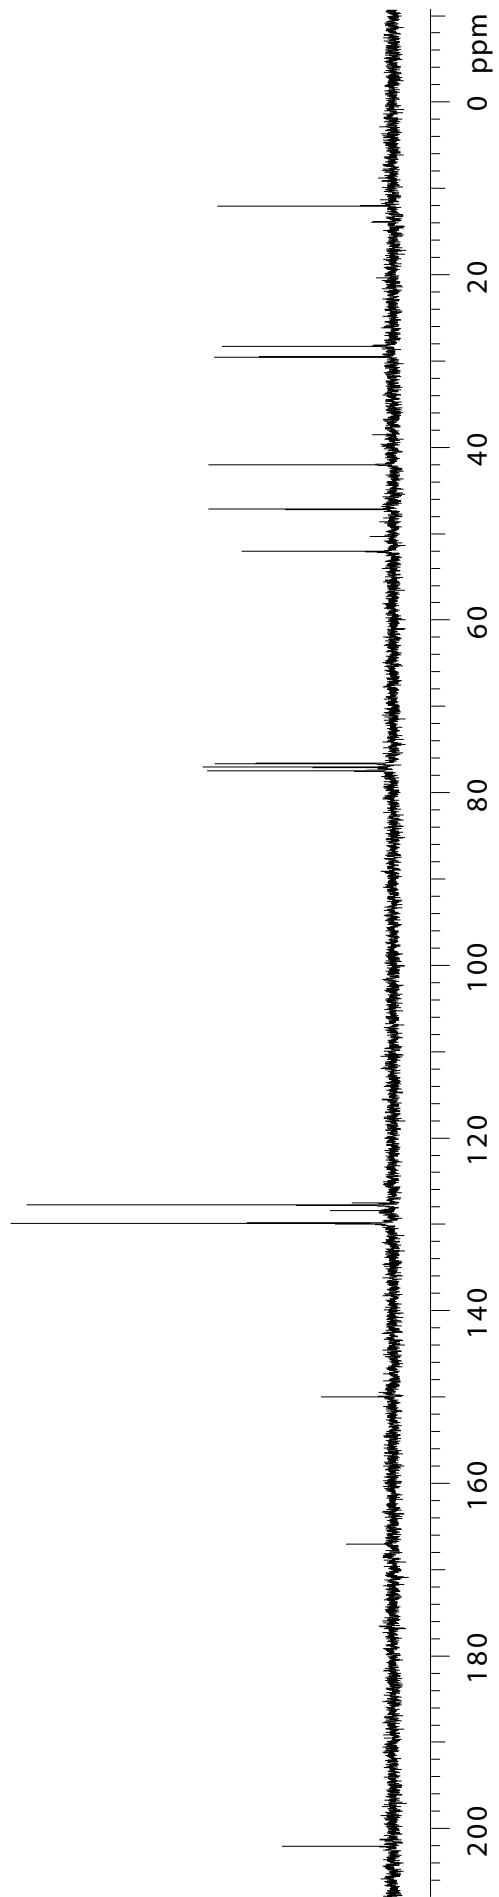

mei-02-184-ester-ol-H

Archive directory: /home/nmr/vnmr1/vnmrSYS/data

File: mei-02-184-ester-ol-H

Pulse Sequence: s2pul

Solvent: CDCl3

Ambient temperature

File: mei-02-184-ester-ol-H

INOVA-500 "nmr-sun"

Relax. delay 1.000 sec

Pulse 46.7 degrees

Acq. time 4.000 sec

Width 4499.9 Hz

30 repetitions

OBSERVE H1, 300.0771271 MH

DATA PROCESSING

FT size 65536

Total time 2 hr, 46 min, 57 sec

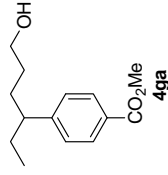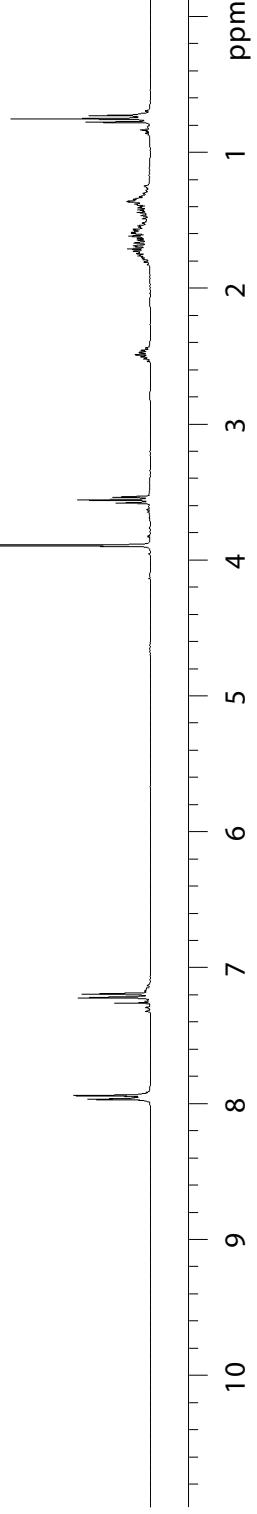

Pulse Sequence: s2pul

Solvent: CDCl3

Ambient temperature

File: mei-02-184-ester-ol - C

INOVA-500 "nmr-5un"

Pulse 41.7 degrees

Acq. time 1.815 sec

Wdth 16501.7 Hz

1412 repetitions

OBSERVE C13, 75.4544581 MH

DECOUPLE H1, 300.0782156 MH

Power 37 dB

continuously on

WALTZ-16 modulated

DATA PROCESSING

Line broadening 1.0 Hz

FT size 65536

Total time 10 hr, 7 min, 58 sec

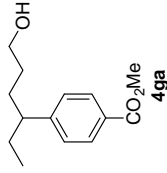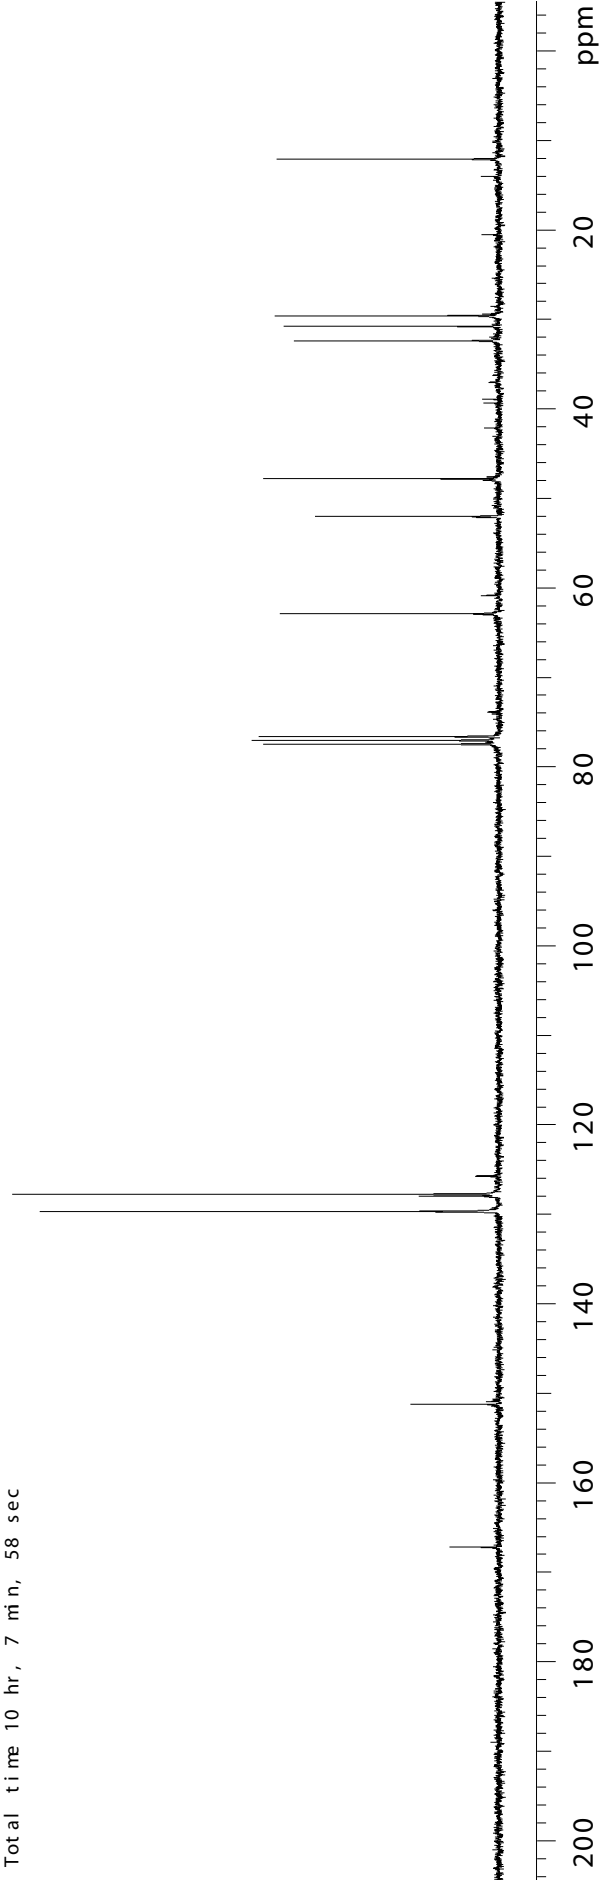

mei-02-188-pure-H

Archive directory: /home/nmr/vnmr1/vnmr sys/dat a

File: mei-02-188-pure-H

Pulse Sequence: s2pul

Solvent: CDCl3

Ambient temperature

File: mei-02-188-pure-H

INOVA-500 "nmr-sun"

Relax. delay 1.000 sec

Pulse 46.7 degrees

Acq.time 4.000 sec

Width 4499.9 Hz

20 repetitions

OBSERVE H1, 300.077188 MH

DATA PROCESSING

FT size 65536

Total time 2 hr, 46 min, 57 sec

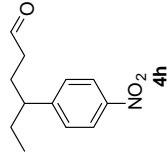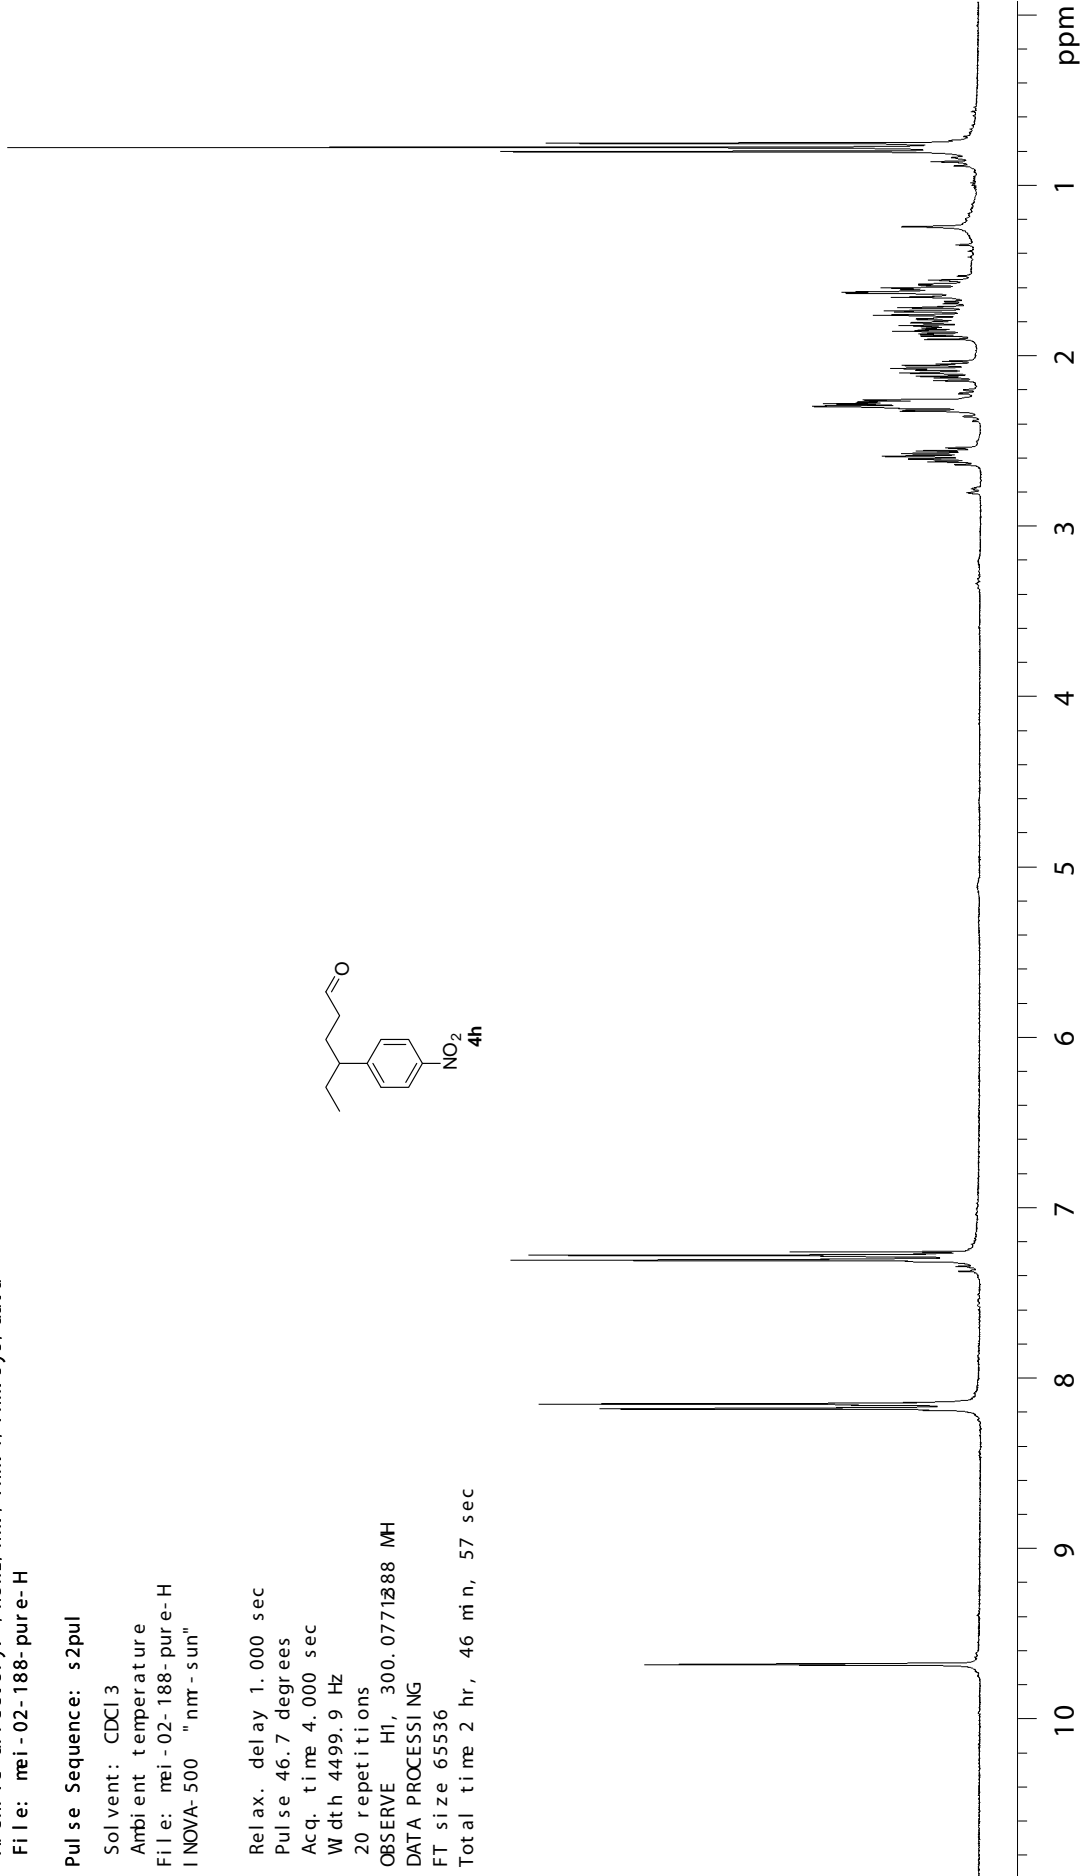

Pulse Sequence: s2pul

Solvent: CDCl3

Ambient temperature

File: mei-02-188-pur e-C

INOVA-500 "nmr - sun"

Pulse 41.7 degrees

Acq. time 1.815 sec

Wdth 16501.7 Hz

3374 repetitions

OBSERVE C13, 75.4544586 MHz

DECOUPLE H1, 300.0782156 MHz

Power 37 dB

continuously on

WALTZ-16 modulated

DATA PROCESSING

Line broadening 1.0 Hz

FT size 65536

Total time 101 hr, 19 min, 47 sec

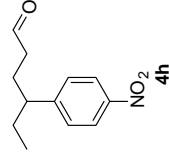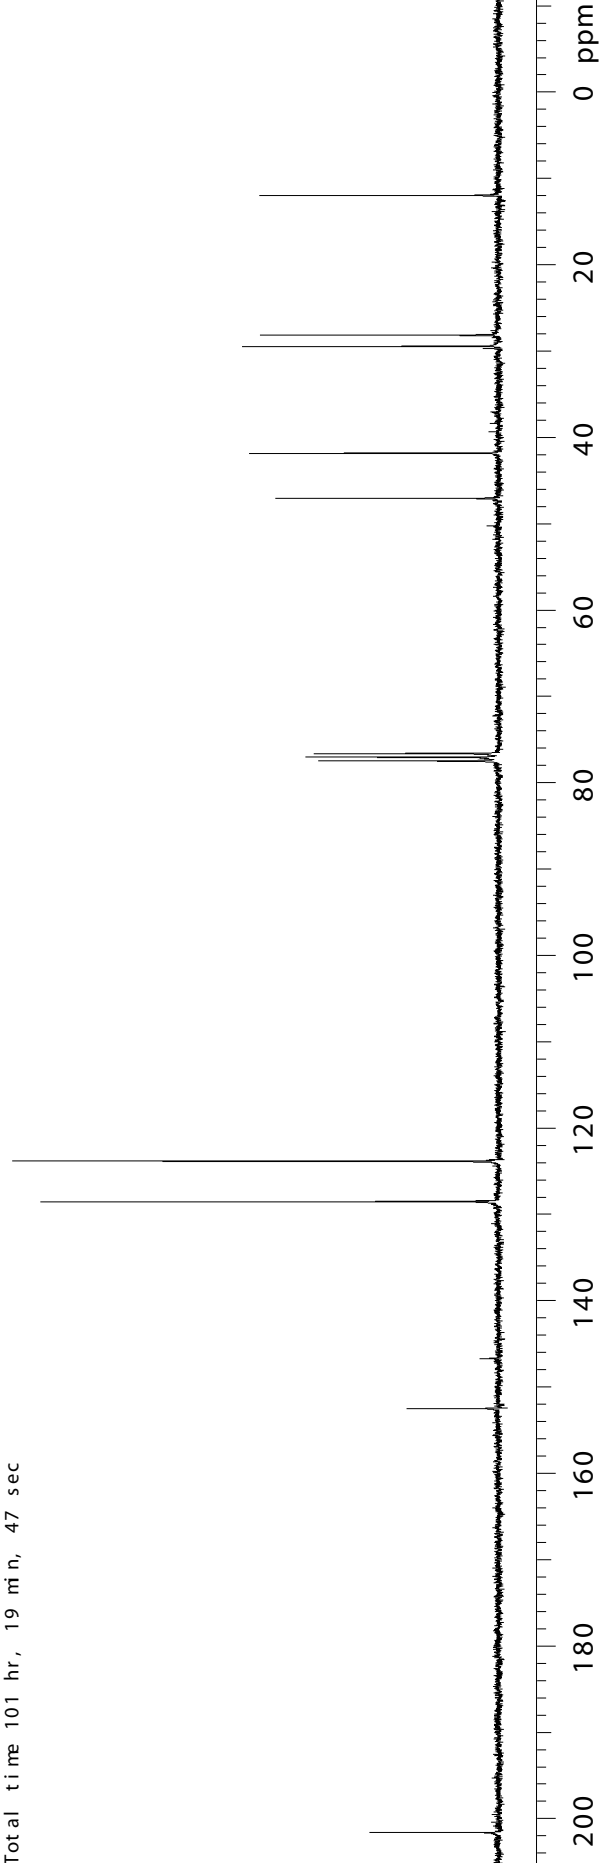

mei-02-188-ol - pure-H

Archive directory: /home/nmr/vnmr1/vnmr sys/dat a

File: mei-02-188-ol - pure-H

Pulse Sequence: s2pul

Solvent: CDCl3

Ambient temperature

File: mei-02-188-ol - pure-H

INOVA-500 "nmr - sun"

Relax. delay 1.000 sec

Pulse 46.7 degrees

Acq. time 4.000 sec

Wdth 4499.9 Hz

31 repetitions

OBSERVE H1, 300.077188 MH

DATA PROCESSING

FT size 65536

Total time 2 hr, 46 min, 57 sec

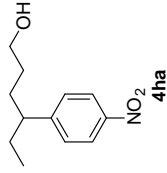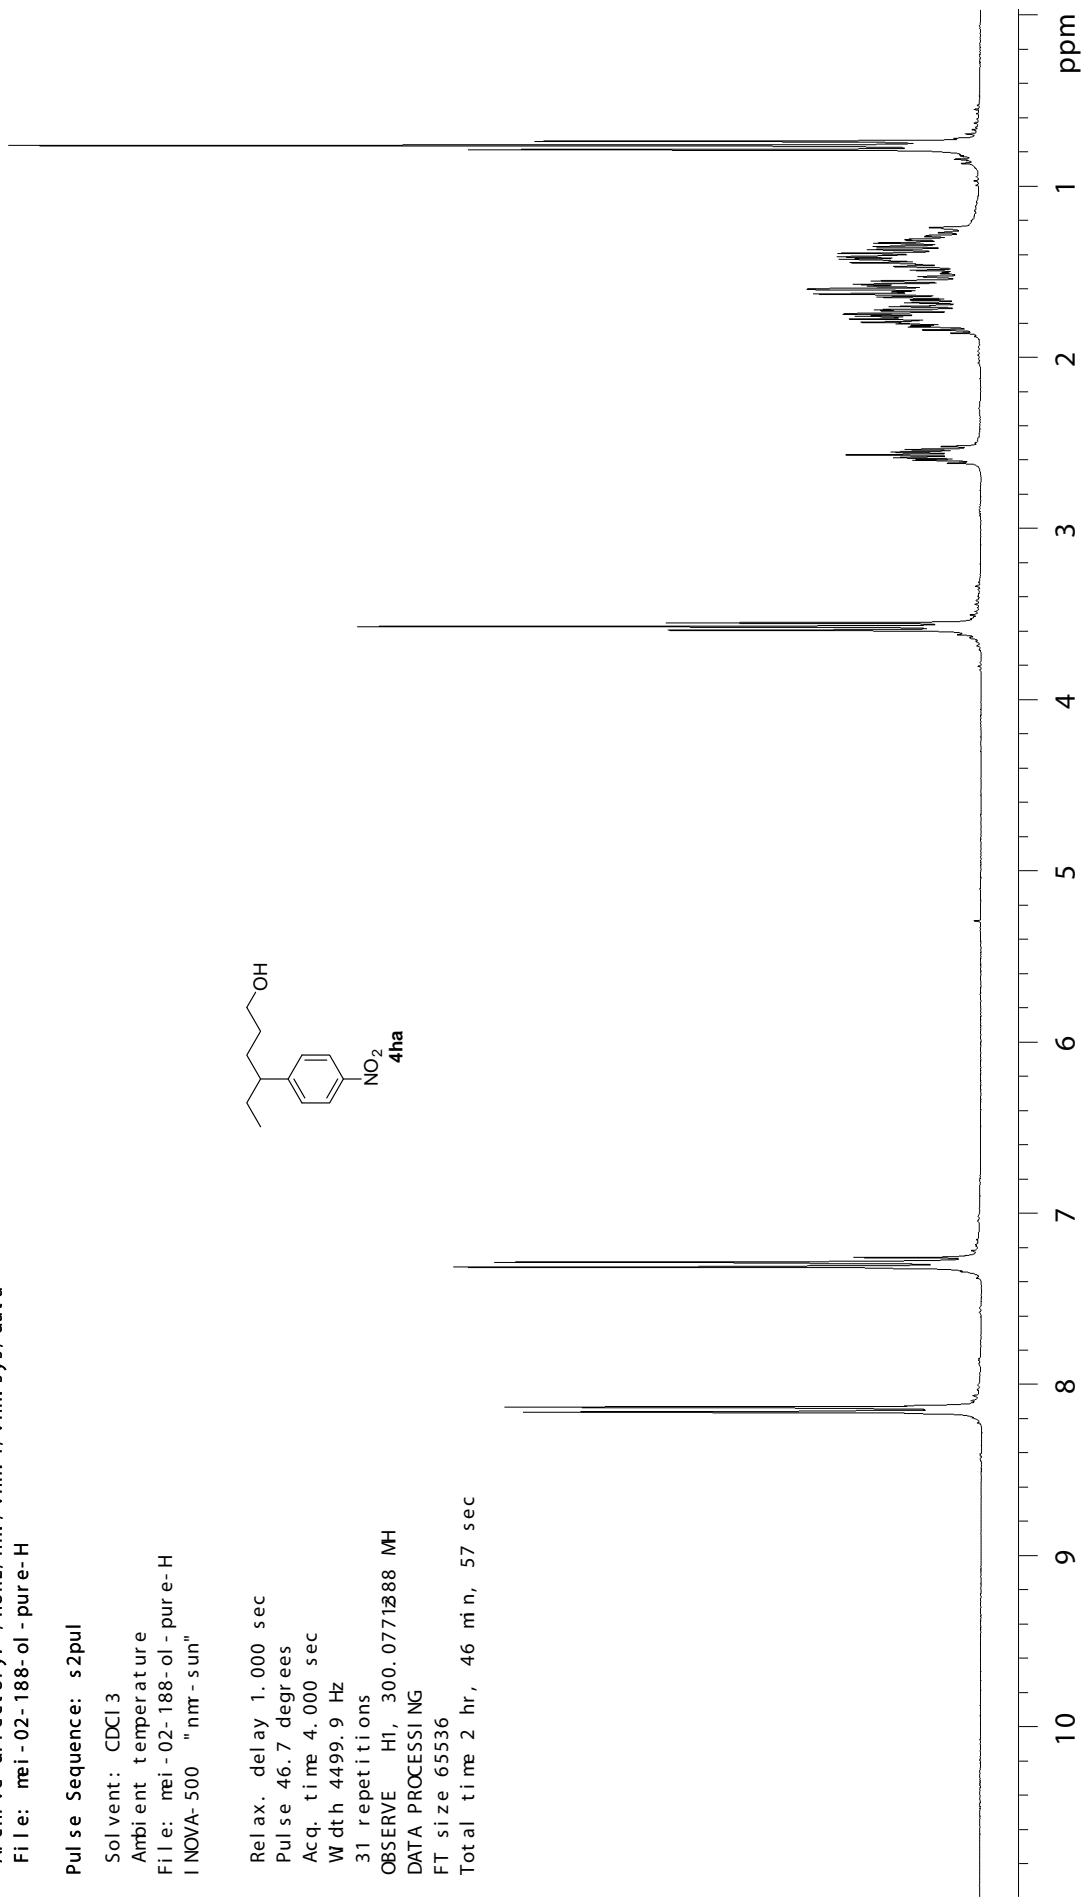



Pulse Sequence: s2pul

Solvent: CDCl3

Ambient temperature

File: mei-02-188-ol - pure - C

INOVA-500 "nmr - sun"

Pulse 41.7 degrees

Acq. time 1.815 sec

Wdth 16501.7 Hz

1181 repetitions

OBSERVE C13, 75.4544591 MHz

DECOUPLE H1, 300.0782156 MHz

Power 37 dB

continuously on

WALTZ-16 modulated

DATA PROCESSING

Line broadening 1.0 Hz

FT size 65536

Total time 101 hr, 19 min, 47 sec

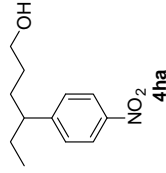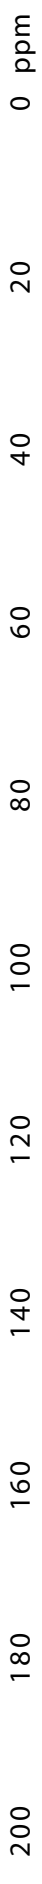

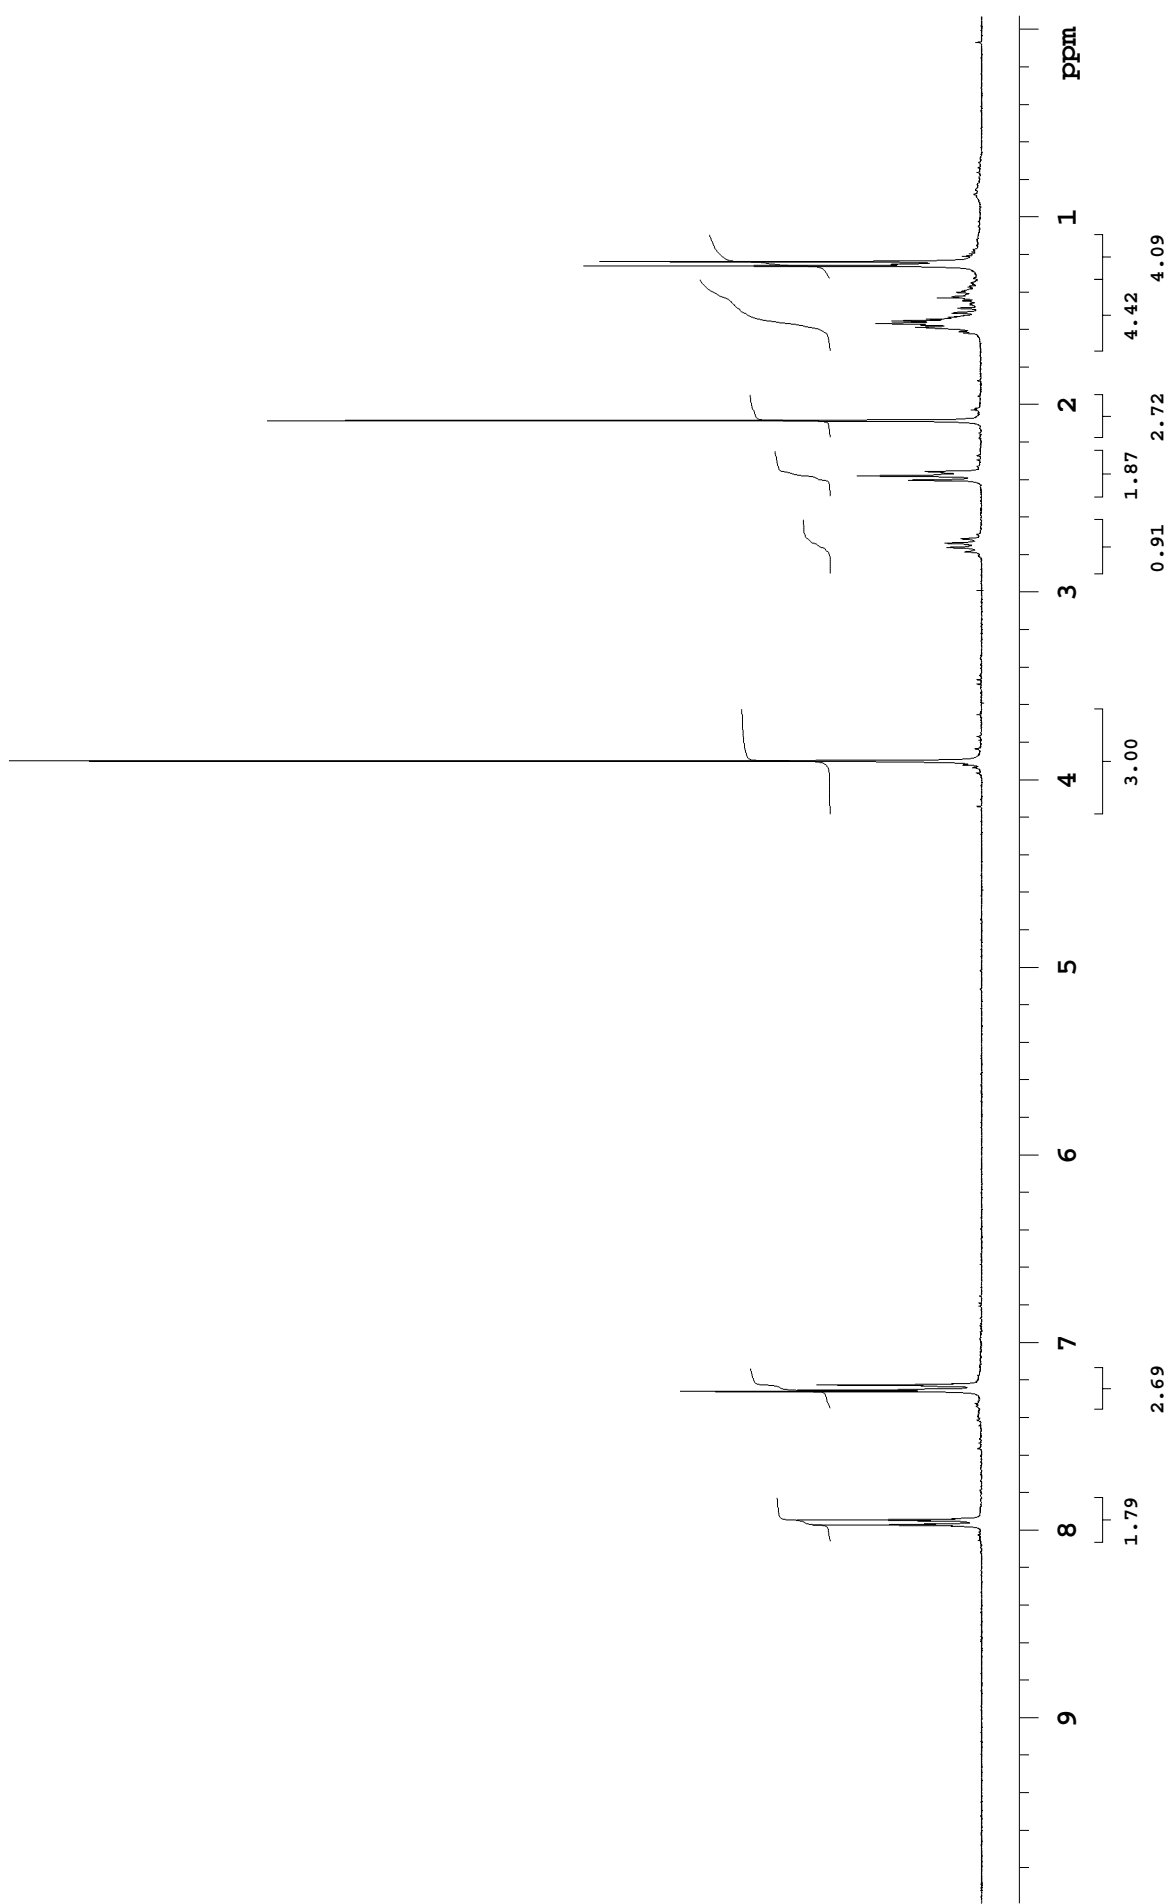

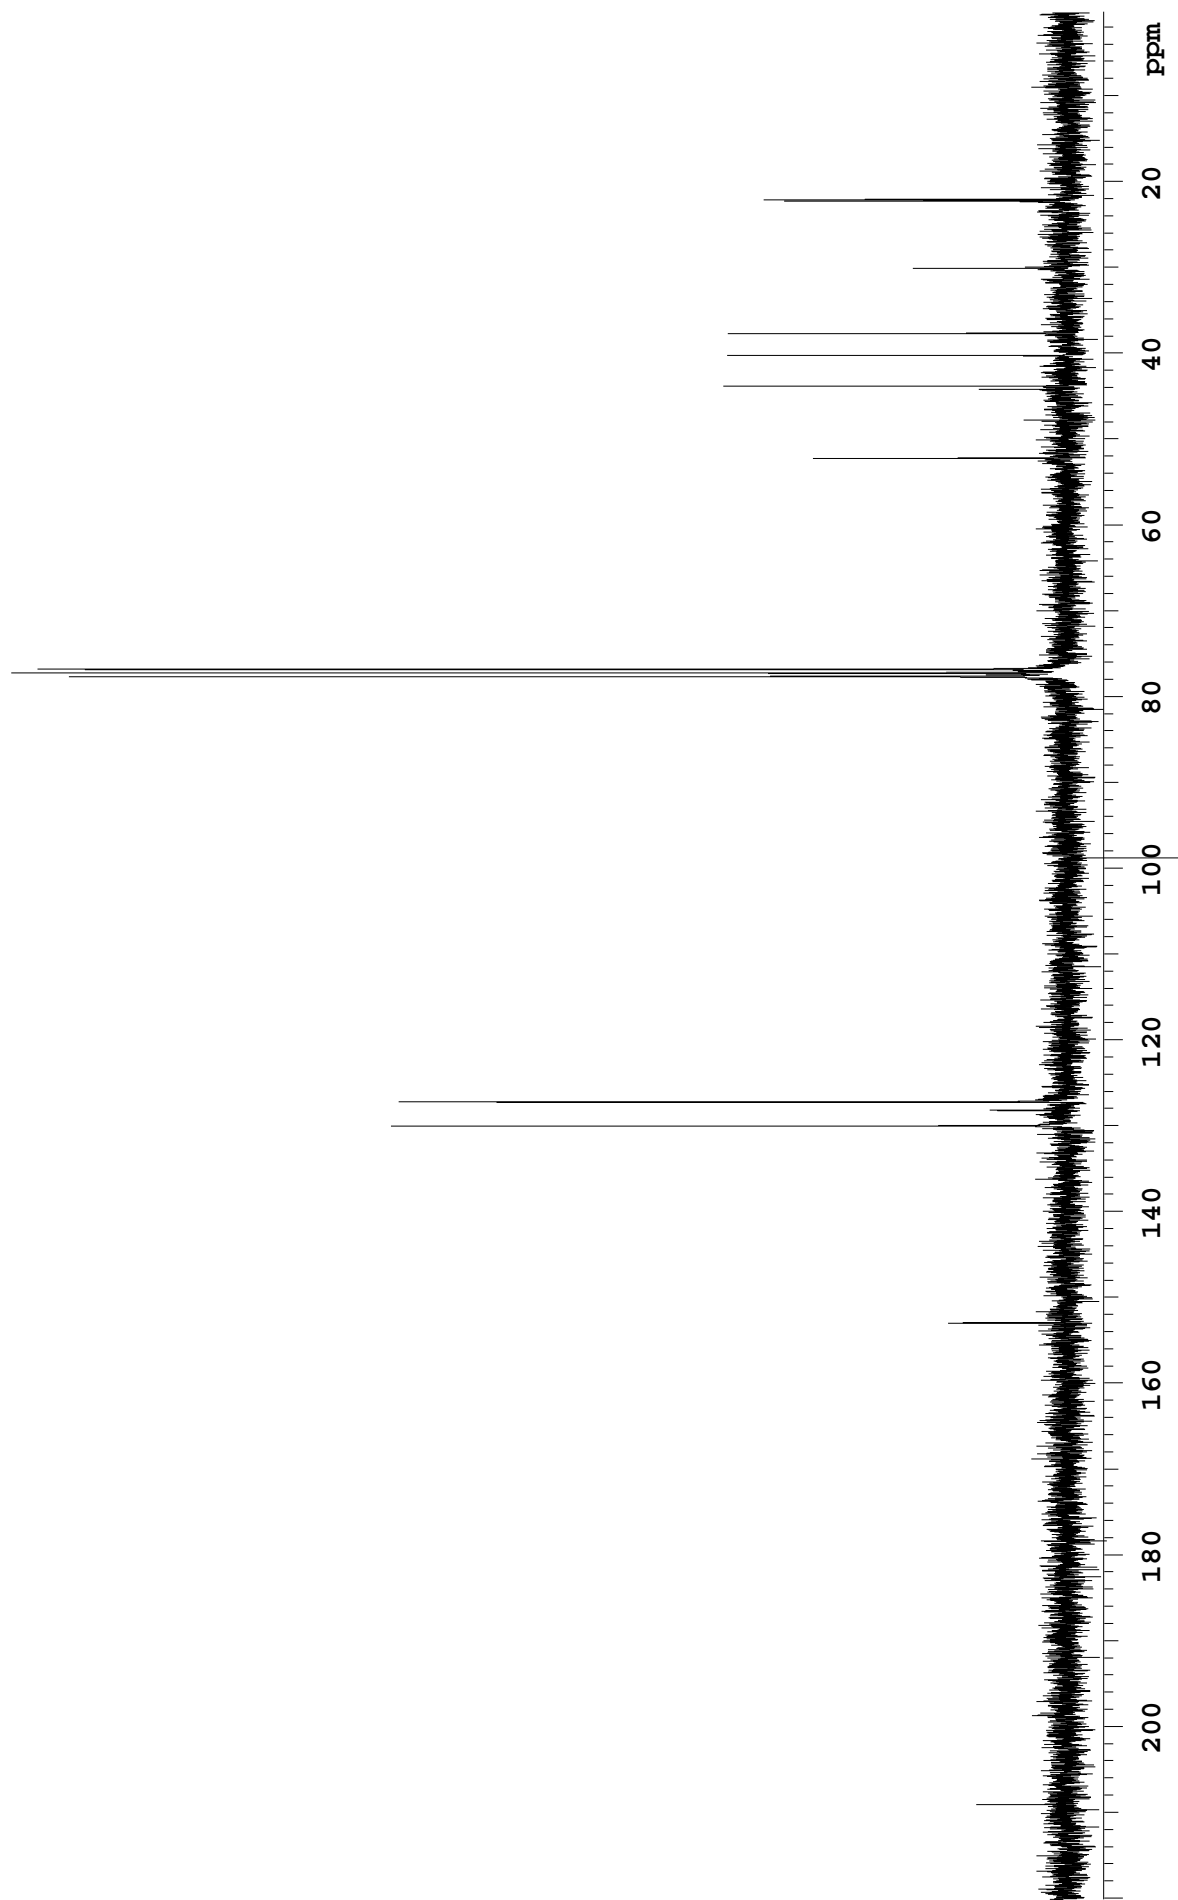

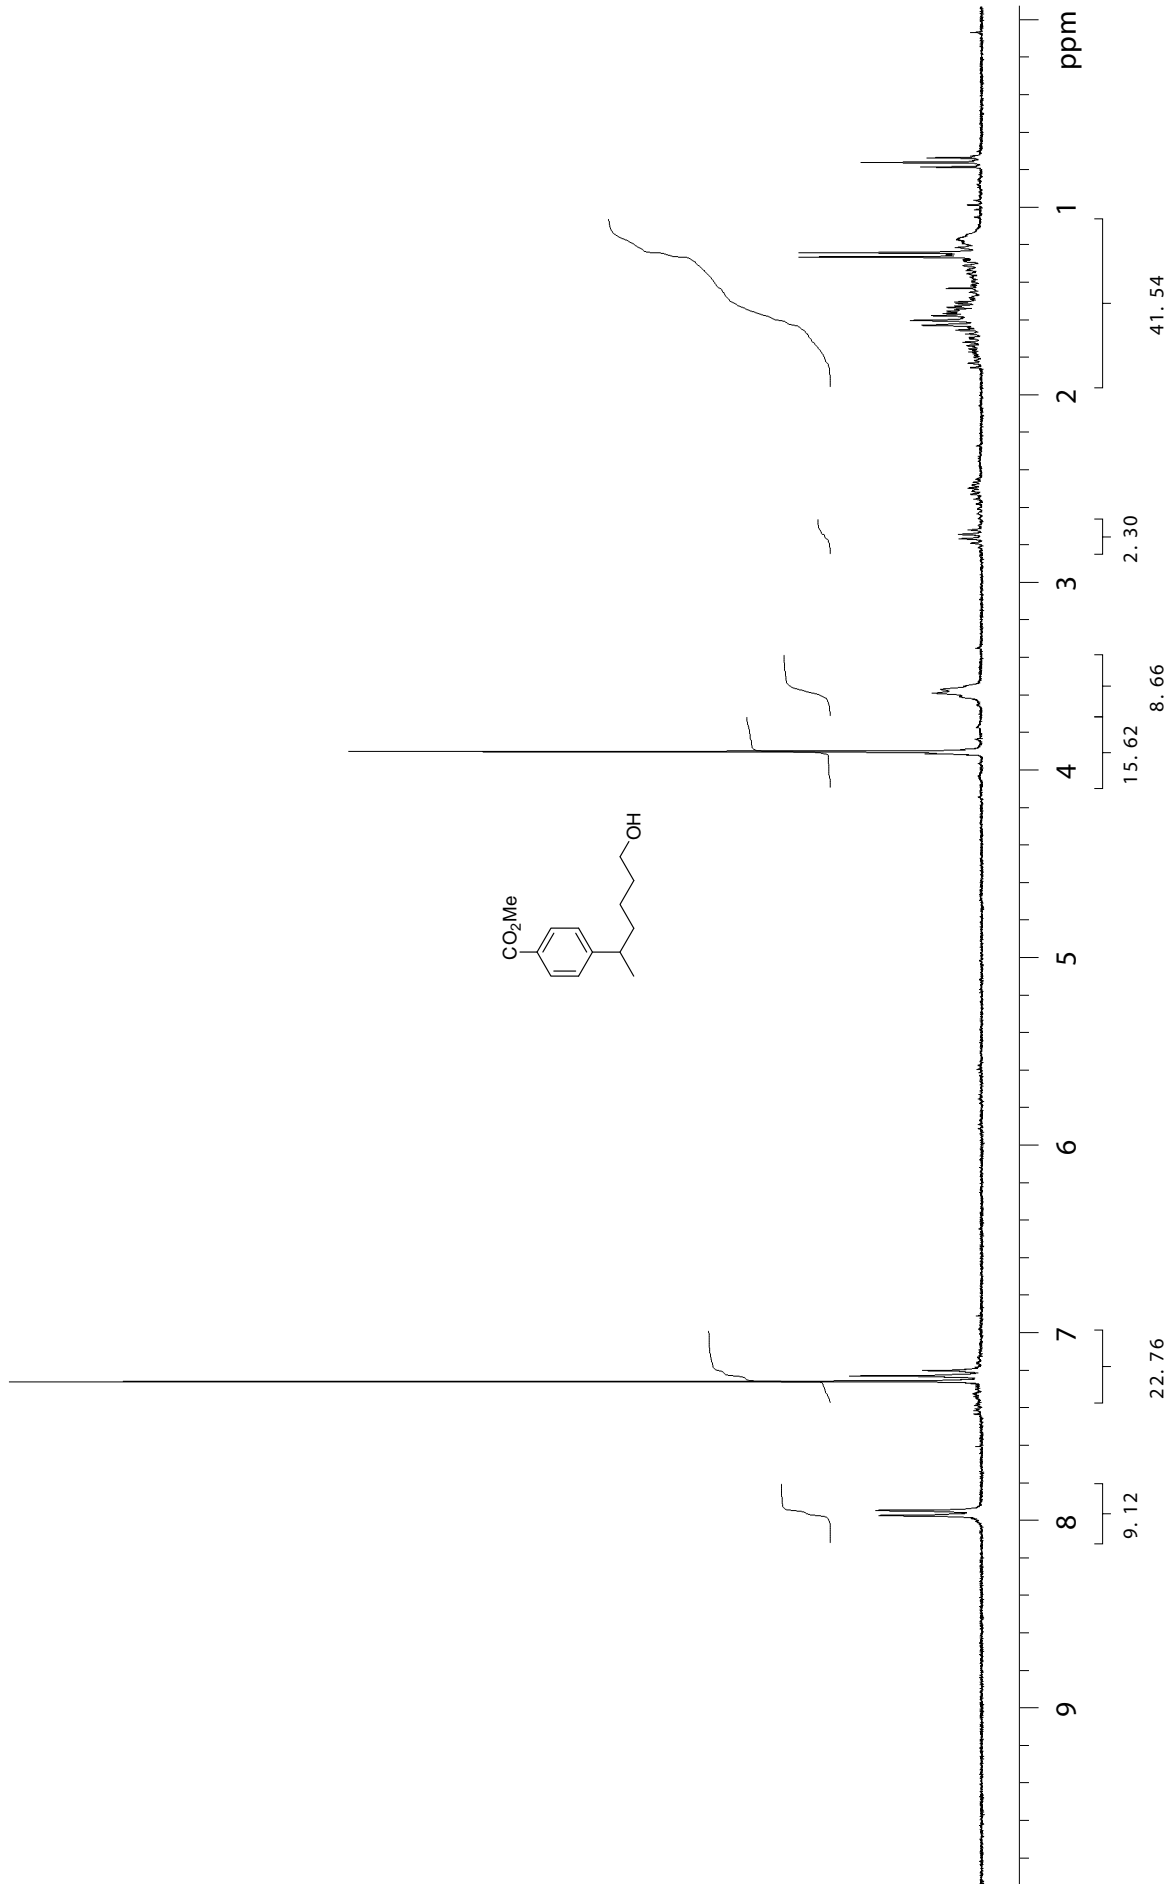

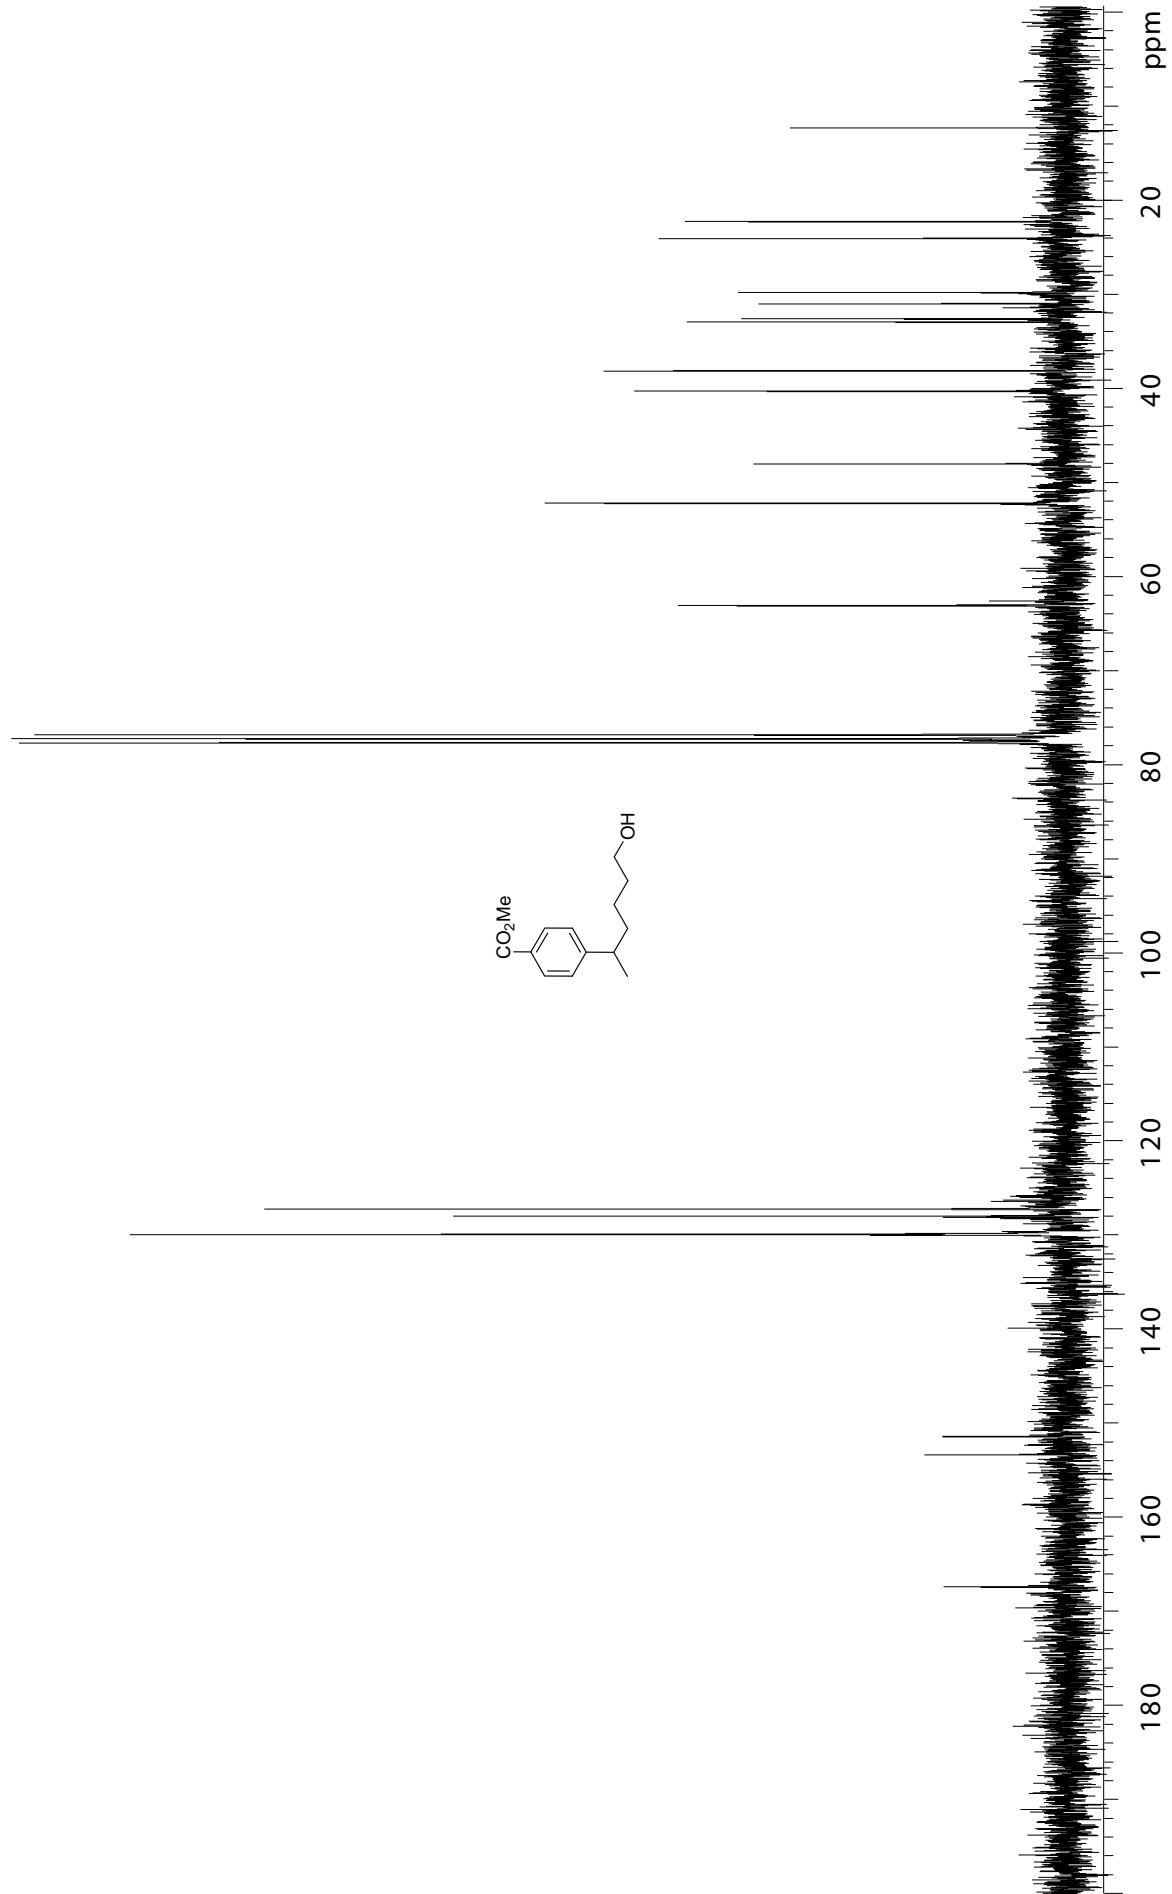

## References and Notes

1. D. Mc Cartney, P. J. Guiry, The asymmetric Heck and related reactions. *Chem. Soc. Rev.* **40**, 5122 (2011). [doi:10.1039/c1cs15101k](https://doi.org/10.1039/c1cs15101k) [Medline](#)
2. M. Shibasaki, E. M. Vogl, T. Ohshima, Asymmetric Heck reaction. *Adv. Synth. Catal.* **346**, 1533 (2004). [doi:10.1002/adsc.200404203](https://doi.org/10.1002/adsc.200404203)
3. A. B. Dounay, L. E. Overman, The asymmetric intramolecular Heck reaction in natural product total synthesis. *Chem. Rev.* **103**, 2945 (2003). [doi:10.1021/cr020039h](https://doi.org/10.1021/cr020039h) [Medline](#)
4. M. S. Sigman, E. W. Werner, Imparting catalyst control upon classical palladium-catalyzed alkenyl C-H bond functionalization reactions. *Acc. Chem. Res.* **45**, 874 (2012). [doi:10.1021/ar200236v](https://doi.org/10.1021/ar200236v) [Medline](#)
5. K. Yonehara *et al.*, Palladium-catalyzed asymmetric intermolecular arylation of cyclic or acyclic alkenes using phosphinite-oxazoline ligands derived from d-glucosamine. *J. Organomet. Chem.* **603**, 40 (2000). [doi:10.1016/S0022-328X\(00\)00069-3](https://doi.org/10.1016/S0022-328X(00)00069-3)
6. K. S. Yoo *et al.*, Asymmetric intermolecular heck-type reaction of acyclic alkenes via oxidative palladium(II) catalysis. *Org. Lett.* **9**, 3933 (2007). [doi:10.1021/ol701584f](https://doi.org/10.1021/ol701584f) [Medline](#)
7. K. S. Yoo *et al.*, Asymmetric intermolecular boron Heck-type reactions via oxidative palladium(II) catalysis with chiral tridentate NHC-amidate-alkoxide ligands. *J. Org. Chem.* **75**, 95 (2010). [doi:10.1021/jo901977n](https://doi.org/10.1021/jo901977n) [Medline](#)
8. I. P. Beletskaya, A. V. Cheprakov, The heck reaction as a sharpening stone of palladium catalysis. *Chem. Rev.* **100**, 3009 (2000). [doi:10.1021/cr9903048](https://doi.org/10.1021/cr9903048) [Medline](#)
9. J. B. Melpolder, R. F. Heck, Palladium-catalyzed arylation of allylic alcohols with aryl halides. *J. Org. Chem.* **41**, 265 (1976). [doi:10.1021/jo00864a017](https://doi.org/10.1021/jo00864a017)
10. F. Berthiol, H. Doucet, M. Santelli, Synthesis of  $\beta$ -aryl ketones by tetraphosphine/palladium catalysed Heck reactions of 2- or 3-substituted allylic alcohols with aryl bromides. *Tetrahedron* **62**, 4372 (2006). [doi:10.1016/j.tet.2006.02.061](https://doi.org/10.1016/j.tet.2006.02.061)
11. V. Calò, A. Nacci, A. Monopoli, V. Ferola, Palladium-catalyzed heck arylations of allyl alcohols in ionic liquids: Remarkable base effect on the selectivity. *J. Org. Chem.* **72**, 2596 (2007). [doi:10.1021/jo070005f](https://doi.org/10.1021/jo070005f) [Medline](#)
12. E. W. Werner, M. S. Sigman, A highly selective and general palladium catalyst for the oxidative Heck reaction of electronically nonbiased olefins. *J. Am. Chem. Soc.* **132**, 13981 (2010). [doi:10.1021/ja1060998](https://doi.org/10.1021/ja1060998) [Medline](#)
13. E. W. Werner, M. S. Sigman, Operationally simple and highly (E)-styrenyl-selective Heck reactions of electronically nonbiased olefins. *J. Am. Chem. Soc.* **133**, 9692 (2011). [doi:10.1021/ja203164p](https://doi.org/10.1021/ja203164p) [Medline](#)

14. S. Bouquillon, B. Ganchegui, B. Estrine, F. Hénin, J. Muzart, Heck arylation of allylic alcohols in molten salts. *J. Organomet. Chem.* **634**, 153 (2001). [doi:10.1016/S0022-328X\(01\)01149-4](https://doi.org/10.1016/S0022-328X(01)01149-4)
15. R. C. Larock, W.-Y. Leung, S. Stolz-Dunn, Synthesis of aryl-substituted aldehydes and ketones via palladium-catalyzed coupling of aryl halides and non-allylic unsaturated alcohols. *Tetrahedron Lett.* **30**, 6629 (1989). [doi:10.1016/S0040-4039\(00\)70636-8](https://doi.org/10.1016/S0040-4039(00)70636-8)
16. J. M. Richter *et al.*, Enantiospecific total synthesis of the hapalindoles, fischerindoles, and welwitindolinones via a redox economic approach. *J. Am. Chem. Soc.* **130**, 17938 (2008). [doi:10.1021/ja806981k](https://doi.org/10.1021/ja806981k) [Medline](#)
17. N. Z. Burns, P. S. Baran, R. W. Hoffmann, Redox economy in organic synthesis. *Angew. Chem. Int. Ed.* **48**, 2854 (2009). [doi:10.1002/anie.200806086](https://doi.org/10.1002/anie.200806086) [Medline](#)
18. K. B. Urkalan, M. S. Sigman, Palladium-catalyzed oxidative intermolecular difunctionalization of terminal alkenes with organostannanes and molecular oxygen. *Angew. Chem. Int. Ed.* **48**, 3146 (2009). [doi:10.1002/anie.200900218](https://doi.org/10.1002/anie.200900218) [Medline](#)
19. K. Kikukawa, K. Nagira, F. Wada, T. Matsuda, Reaction of diazonium salts with transition metals—III: Palladium(0)-catalyzed arylation of unsaturated compounds with arenediazoium salts. *Tetrahedron* **37**, 31 (1981). [doi:10.1016/S0040-4020\(01\)97711-7](https://doi.org/10.1016/S0040-4020(01)97711-7)
20. J. G. Taylor, A. V. Moro, C. R. D. Correia, Evolution and synthetic applications of the Heck–Matsuda reaction: The return of arenediazonium salts to prominence. *Eur. J. Org. Chem.* **2011**, 1403 (2011). [doi:10.1002/ejoc.201001620](https://doi.org/10.1002/ejoc.201001620)
21. A. Roglans, A. Pla-Quintana, M. Moreno-Mañas, Diazonium salts as substrates in palladium-catalyzed cross-coupling reactions. *Chem. Rev.* **106**, 4622 (2006). [doi:10.1021/cr0509861](https://doi.org/10.1021/cr0509861) [Medline](#)
22. K. H. Jensen, T. P. Pathak, Y. Zhang, M. S. Sigman, Palladium-catalyzed enantioselective addition of two distinct nucleophiles across alkenes capable of quinone methide formation. *J. Am. Chem. Soc.* **131**, 17074 (2009). [doi:10.1021/ja909030c](https://doi.org/10.1021/ja909030c) [Medline](#)
23. B. W. Michel, A. M. Camelio, C. N. Cornell, M. S. Sigman, A general and efficient catalyst system for a Wacker-type oxidation using TBHP as the terminal oxidant: Application to classically challenging substrates. *J. Am. Chem. Soc.* **131**, 6076 (2009). [doi:10.1021/ja901212h](https://doi.org/10.1021/ja901212h) [Medline](#)
24. R. I. McDonald, P. B. White, A. B. Weinstein, C. P. Tam, S. S. Stahl, Enantioselective Pd(II)-catalyzed aerobic oxidative amidation of alkenes and insights into the role of electronic asymmetry in pyridine-oxazoline ligands. *Org. Lett.* **13**, 2830 (2011). [doi:10.1021/ol200784y](https://doi.org/10.1021/ol200784y) [Medline](#)
25. K. Kikushima, J. C. Holder, M. Gatti, B. M. Stoltz, Palladium-catalyzed asymmetric conjugate addition of arylboronic acids to five-, six-, and seven-membered  $\beta$ -substituted cyclic enones: Enantioselective construction of all-carbon quaternary

- stereocenters. *J. Am. Chem. Soc.* **133**, 6902 (2011). [doi:10.1021/ja200664x](https://doi.org/10.1021/ja200664x)  
[Medline](#)
26. K. C. Harper, M. S. Sigman, Three-dimensional correlation of steric and electronic free energy relationships guides asymmetric propargylation. *Science* **333**, 1875 (2011). [doi:10.1126/science.1206997](https://doi.org/10.1126/science.1206997) [Medline](#)
27. K. C. Harper, E. N. Bess, M. S. Sigman, Multidimensional steric parameters in the analysis of asymmetric catalytic reactions. *Nat. Chem.* **4**, 366 (2012).  
[doi:10.1038/nchem.1297](https://doi.org/10.1038/nchem.1297) [Medline](#)
28. B. W. Michel, L. D. Steffens, M. S. Sigman, On the mechanism of the palladium-catalyzed tert-butylhydroperoxide-mediated Wacker-type oxidation of alkenes using quinoline-2-oxazoline ligands. *J. Am. Chem. Soc.* **133**, 8317 (2011).  
[doi:10.1021/ja2017043](https://doi.org/10.1021/ja2017043) [Medline](#)
29. K. H. Jensen, J. D. Webb, M. S. Sigman, Advancing the mechanistic understanding of an enantioselective palladium-catalyzed alkene difunctionalization reaction. *J. Am. Chem. Soc.* **132**, 17471 (2010). [doi:10.1021/ja108106h](https://doi.org/10.1021/ja108106h) [Medline](#)
30. T. Hayashi, K. Yamasaki, Rhodium-catalyzed asymmetric 1,4-addition and its related asymmetric reactions. *Chem. Rev.* **103**, 2829 (2003). [doi:10.1021/cr020022z](https://doi.org/10.1021/cr020022z)  
[Medline](#)
31. S. W. Smith, G. C. Fu, Asymmetric carbon-carbon bond formation  $\gamma$  to a carbonyl group: Phosphine-catalyzed addition of nitromethane to allenes. *J. Am. Chem. Soc.* **131**, 14231 (2009). [doi:10.1021/ja9061823](https://doi.org/10.1021/ja9061823) [Medline](#)
32. S. L. Zultanski, G. C. Fu, Catalytic asymmetric  $\gamma$ -alkylation of carbonyl compounds via stereoconvergent Suzuki cross-couplings. *J. Am. Chem. Soc.* **133**, 15362 (2011). [doi:10.1021/ja2079515](https://doi.org/10.1021/ja2079515) [Medline](#)
33. K. S. Ayyar, G. S. K. Rao, Studies in terpenoids. IV. Synthetic studies in juvabionones and analogues. Conversion of *ar* - (+)-turmerone to *ar* - (+)-juvabione. *Can. J. Chem.* **46**, 1467 (1968). [doi:10.1139/v68-242](https://doi.org/10.1139/v68-242)
34. K. Tanaka *et al.*, Use of 1,1'-binaphthalene-8,8'-diol as a chiral auxiliary for asymmetric Michael addition. Application to the syntheses of turmeronol A and B. *Chem. Pharm. Bull.* **47**, 1053 (1999). [doi:10.1248/cpb.47.1053](https://doi.org/10.1248/cpb.47.1053)
35. L. Djakovitch, M. Wagner, C. G. Hartung, M. Beller, K. Koehler, Pd-catalyzed Heck arylation of cycloalkenes—studies on selectivity comparing homogeneous and heterogeneous catalysts. *J. Mol. Catal. Chem.* **219**, 121 (2004).  
[doi:10.1016/j.molcata.2004.04.035](https://doi.org/10.1016/j.molcata.2004.04.035)
36. K. A. Parker, J. J. Petraitis, R. W. Kosley Jr., S. L. Buchwald, Reactions of propargyl alcohols with amide acetals. *J. Org. Chem.* **47**, 389 (1982).  
[doi:10.1021/jo00342a002](https://doi.org/10.1021/jo00342a002)
37. J. Suffert, D. Toussaint, An easy and useful preparation of propynyllithium from (Z/E)-1-bromopropene. *J. Org. Chem.* **60**, 3550 (1995). [doi:10.1021/jo00116a051](https://doi.org/10.1021/jo00116a051)
38. W. R. Roush, J. A. Straub, R. J. Brown, Total synthesis of carbohydrates. 5. Stereochemistry of the epoxidations of acyclic allylic amides. Applications



- towards the synthesis of 2,3,6-trideoxy-3-aminohexoses. *J. Org. Chem.* **52**, 5127 (1987). [doi:10.1021/jo00232a014](https://doi.org/10.1021/jo00232a014)
39. K.-K. Chan, N. Cohen, J. P. De Noble, A. C. Specian Jr., G. Saucy, Synthetic studies on (2R,4'R,8'R)- $\alpha$ -tocopherol. Facile syntheses of optically active, saturated, acyclic isoprenoids via stereospecific [3,3]sigmatropic rearrangements. *J. Org. Chem.* **41**, 3497 (1976). [doi:10.1021/jo00884a001](https://doi.org/10.1021/jo00884a001) [Medline](#)
40. D. A. Oare, M. A. Henderson, M. A. Sanner, C. H. Heathcock, Acyclic stereoselection. 46. Stereochemistry of the Michael addition of N,N-disubstituted amide and thioamide enolates to  $\alpha,\beta$ -unsaturated ketones. *J. Org. Chem.* **55**, 132 (1990). [doi:10.1021/jo00288a027](https://doi.org/10.1021/jo00288a027)
41. S. Ma, B. Wu, X. Jiang, S. Zhao, Studies on Pd(II)-catalyzed synthesis of (Z)- $\alpha$ -haloalkylidene- $\beta$ -lactones from cyclocarbonylation of 2-alkynols and the subsequent coupling reactions. *J. Org. Chem.* **70**, 2568 (2005). [doi:10.1021/jo0480038](https://doi.org/10.1021/jo0480038) [Medline](#)
42. A. Parenty, J.-M. Campagne, C. Aroulanda, P. Lesot, Routine use of natural abundance deuterium NMR in a polypeptidic chiral oriented solvent for the determination of the enantiomeric composition of chiral building blocks. *Org. Lett.* **4**, 1663 (2002). [doi:10.1021/ol020038b](https://doi.org/10.1021/ol020038b) [Medline](#)
43. J. B. Baudin, S. A. Julia, R. Lorne, Substituted propargyl sulfoxides: Synthesis and [2,3]-sigmatropic rearrangement in the presence of thiophilic reagents. *Bull. Soc. Chim. Fr.* **129**, 440 (1992).
44. D. Hoppe, T. Kramer,  $\alpha$ -Deprotonierung eines  $\alpha$ -chiralen 2-Alkenylcarbamats unter Retention und Lithium-Titan-Austausch unter Inversion - zur Homoaldol-Reaktion unter 1,3-Chiralitätsübertragung. *Angew. Chem.* **98**, 171 (1986). [doi:10.1002/ange.19860980212](https://doi.org/10.1002/ange.19860980212)
45. M. Z. Chen *et al.*, Preparation of stereodefined homoallylic amines from the reductive cross-coupling of allylic alcohols with imines. *J. Org. Chem.* **75**, 8048 (2010). [doi:10.1021/jo101535d](https://doi.org/10.1021/jo101535d) [Medline](#)
46. D. Savoia, E. Tagliavini, C. Trombini, A. Umani-Ronchi, Active metals from potassium-graphite. Highly dispersed nickel on graphite as a new catalyst for the stereospecific semihydrogenation of alkynes. *J. Org. Chem.* **46**, 5340 (1981). [doi:10.1021/jo00339a016](https://doi.org/10.1021/jo00339a016)
47. X. Li *et al.*, Chemoselective conjugate reduction of  $\alpha,\beta$ -unsaturated ketones catalyzed by rhodium amido complexes in aqueous media. *J. Org. Chem.* **75**, 2981 (2010). [doi:10.1021/jo100256t](https://doi.org/10.1021/jo100256t) [Medline](#)
48. R. Naef, A. Velluz, A. Jaquier, New volatile sulfur-containing constituents in a simultaneous distillation-extraction extract of red bell peppers (*Capsicum annuum*). *J. Agric. Food Chem.* **56**, 517 (2008). [doi:10.1021/jf072493y](https://doi.org/10.1021/jf072493y) [Medline](#)
49. L.-J. Gazzard, W. B. Motherwell, D. Sandham, Rhodium promoted isomerisation of allylic alkoxides: A new method for enolate anion formation. *J. Chem. Soc. Perkin Trans. 1* **8**, 979 (1999). [doi:10.1039/a901370i](https://doi.org/10.1039/a901370i)

50. D. Yang, G. C. Micalizio, Convergent and stereodivergent synthesis of complex 1-aza-7-oxabicyclo[2.2.1]heptanes. *J. Am. Chem. Soc.* **133**, 9216 (2011).  
[doi:10.1021/ja202900h](https://doi.org/10.1021/ja202900h) [Medline](#)
51. K. G. Rutherford, W. Redmon, *Org. Synth.* **5**, 133 (1973).
